# Supplementary material for: The Lipogenic Regulator SREBP2 Induces Transferrin in Circulating Melanoma Cells and Suppresses Ferroptosis
Source: Oxford University Press journal article supplement (doi:10.1158/2159-8290.cd-19-1500), 2020-11-17
Supplement: 21598290cd191500-sup-234279_2_supp_6710147_qjjkp9.xlsx [file 21598290cd191500-sup-234279_2_supp_6710147_qjjkp9.xlsx]

## Sheet: Mel167.CTC.vs.Mel167.Primary
Gene	Log2FoldChange	P value	FDR-adjust P value
TUBA1B	8.94872	8.46836e-06	0.00203972
PPIB	8.66951	0.000130826	0.00438877
PAGE5	8.50223	4.19155e-07	0.0019419
FDPS	8.30862	9.65959e-05	0.00396123
ALDOC	8.24292	5.4088e-06	0.00203972
CYP51A1	7.9814	1.5887e-06	0.0019419
PHB	7.90131	0.000231537	0.00557298
MRPS18A	7.47658	2.37611e-05	0.00249772
SUMF2	7.31525	0.000567876	0.00805843
GAPDH	7.25249	0.000126024	0.00431962
UCN2	7.20002	1.04559e-06	0.0019419
AIMP2	7.15624	3.42829e-06	0.0019419
PPP1CA	7.10126	0.000101099	0.00401048
MAGEA1	7.07283	5.9524e-06	0.00203972
PYCR1	7.04517	2.55421e-05	0.00252094
PDIA6	7.0111	0.000109102	0.00402593
LOXL3	6.98568	8.85117e-06	0.00203972
BIN3	6.91752	2.15186e-06	0.0019419
BECN1	6.88016	4.51388e-05	0.00316916
CCDC86	6.87072	1.51011e-06	0.0019419
ACO2	6.86486	0.000126449	0.00431962
ACAT2	6.64755	1.68558e-06	0.0019419
PCDHGC3	6.61882	1.00734e-05	0.00203972
ZMAT5	6.61443	1.82785e-06	0.0019419
HGS	6.61098	1.31685e-05	0.00208951
CDK4	6.61019	1.19807e-05	0.00203972
CALR	6.60834	0.00962024	0.0364281
HSD17B12	6.5817	3.48958e-06	0.0019419
TSPAN7	6.57712	0.000267557	0.00592997
PRMT5	6.5766	1.66176e-06	0.0019419
HMGCS1	6.42878	0.000123375	0.00427843
P4HB	6.42003	0.00384888	0.0212595
TMEM179B	6.38738	0.0039154	0.0214422
NHP2	6.3426	0.00051617	0.00767223
NDUFS7	6.33949	4.35203e-05	0.00316507
TF	6.31152	0.000991709	0.0105162
MTX1	6.30346	2.63693e-06	0.0019419
NAPA	6.29115	3.82377e-05	0.00295689
MAT2A	6.27455	9.75878e-05	0.00397442
HIST1H2BK	6.20495	0.000635156	0.00854663
EIF3L	6.18938	9.64953e-06	0.00203972
SEC24C	6.18887	6.32512e-06	0.00203972
ICAM1	6.15381	9.60611e-06	0.00203972
WIPI1	6.14263	0.000197871	0.00521031
NUDT22	6.12302	6.95726e-05	0.00348376
SLAMF9	6.06841	2.67271e-05	0.00253439
RFXANK	6.06616	0.000145437	0.00462165
PIAS3	6.03854	2.92329e-06	0.0019419
GBA	6.02368	0.000120365	0.00423118
ZDHHC4	6.00947	5.3098e-05	0.00321164
TAF6	5.93504	4.13238e-06	0.0019419
MLST8	5.88986	6.42868e-06	0.00203972
CCT5	5.88647	8.93619e-06	0.00203972
ATG101	5.87969	1.06137e-05	0.00203972
SCO2	5.85207	1.43511e-05	0.00211905
BUD31	5.84535	0.00290997	0.018095
ABCB6	5.84117	2.61495e-05	0.00252094
FCRLA	5.83814	0.000836948	0.00985147
ANGPTL4	5.82291	0.00352026	0.0202689
HMGN4	5.80471	5.84698e-06	0.00203972
RPS6KB2	5.78556	3.65415e-05	0.00289912
APOBEC3B	5.78438	8.51672e-06	0.00203972
ACTL6A	5.78377	0.00364838	0.0205703
WDR74	5.7769	3.77827e-06	0.0019419
M6PR	5.7631	0.00274063	0.0175314
TUBB4B	5.74589	0.00312574	0.018813
VPS52	5.73615	2.53247e-05	0.00252094
HYOU1	5.73517	8.12585e-06	0.00203972
NOC2L	5.73195	5.60684e-05	0.00330939
MAGEA3	5.72868	0.00295629	0.018242
MPG	5.69298	0.000145814	0.00462165
CENPBD1	5.6715	9.41709e-06	0.00203972
C11orf98	5.66675	0.000714158	0.0091557
SLC4A2	5.66237	7.27615e-06	0.00203972
IER3	5.65631	0.00156054	0.0129903
PGAM1	5.64309	0.00148001	0.0126769
PRDX1	5.6299	6.49145e-06	0.00203972
ACOT8	5.60758	0.000349493	0.00670346
PLIN3	5.59886	0.00222919	0.0157164
RNF40	5.57949	4.66521e-05	0.00316916
CHMP6	5.56657	6.45169e-06	0.00203972
GAPDHS	5.52787	7.55513e-06	0.00203972
FBXW9	5.51606	1.52793e-05	0.00219165
RNF26	5.42351	5.80896e-06	0.00203972
ITGB3	5.41228	0.000384181	0.00688277
YIPF2	5.39049	0.000261709	0.0059214
MAGEA6	5.38518	0.0015495	0.0129603
TUBA1C	5.37038	0.000463122	0.00733076
RAB4B	5.35843	0.00016554	0.00481211
TFPT	5.35786	0.00390541	0.0214137
AGT	5.35641	9.83414e-06	0.00203972
NME7	5.3226	2.00154e-05	0.00239753
SPTLC1	5.30897	0.000170561	0.00488035
ANGPTL2	5.28178	0.0018334	0.0140266
LCN2	5.25144	0.0115111	0.0405661
IDH3A	5.24409	5.43789e-05	0.00325687
TFIP11	5.23967	1.771e-05	0.00225396
TMEM186	5.22565	1.10493e-05	0.00203972
BOLA2	5.20465	2.39182e-05	0.00249772
FKBP3	5.19031	0.000970841	0.0104578
PHPT1	5.17945	0.0196159	0.0570229
MAN2C1	5.17239	7.59152e-06	0.00203972
RECQL	5.14558	0.000985614	0.0104912
KAT5	5.14478	7.6696e-06	0.00203972
PPP2R5D	5.13164	4.58353e-05	0.00316916
SUMO1	5.12872	0.0121165	0.0418725
LASP1	5.1245	1.55627e-05	0.00219165
HARS	5.12286	0.000531141	0.00778115
CYB561A3	5.11213	1.64105e-05	0.00221378
F2RL2	5.08866	0.0033652	0.0196916
PRDX2	5.08539	0.0119868	0.0415567
KBTBD4	5.07472	8.41535e-06	0.00203972
MED31	5.073	0.00178055	0.0138126
INTS3	5.04981	1.47207e-05	0.00214116
C17orf49	5.04383	0.000725919	0.00924847
PNPO	5.03037	0.000318421	0.00632499
HMGN2	5.01986	1.59853e-05	0.00220999
MRPL9	5.01252	0.00518667	0.0250936
SHC1	5.00139	4.91664e-05	0.00316916
EBP	4.99633	0.013613	0.0450688
ARF5	4.97727	0.00471025	0.0237797
SDR39U1	4.96997	7.99086e-06	0.00203972
KRT27	4.9673	0.000181053	0.00494878
ECE1	4.95745	0.00103145	0.0107209
BAAT	4.95335	0.00593844	0.0271408
MANBA	4.95324	1.6708e-05	0.00221378
EEF2KMT	4.94369	5.55607e-05	0.00329534
DDT	4.92461	0.00440589	0.0228002
CNOT1	4.913	0.000336148	0.00653991
MOB2	4.85594	1.10291e-05	0.00203972
DNAJC14	4.84344	0.000225184	0.00551963
LSM1	4.81142	2.24036e-05	0.00240111
CD70	4.80865	7.91847e-05	0.00363168
PFKFB4	4.80459	0.00244124	0.0164337
FN1	4.8038	0.000822539	0.0097969
ARL2BP	4.79317	2.46313e-05	0.00250788
THTPA	4.79061	2.49023e-05	0.00251452
ITIH5	4.78943	1.40282e-05	0.00211905
SPSB3	4.75571	4.97529e-05	0.00316916
KCTD11	4.75426	2.94968e-05	0.00266263
NUBP1	4.74521	0.000535376	0.00781036
POLR2B	4.74027	0.00147916	0.0126769
FIBP	4.70643	0.0123174	0.0422989
RBBP4	4.69494	0.00297856	0.0183427
SPAG5	4.68224	0.00532006	0.0254901
ALG12	4.67984	1.25265e-05	0.00204064
THBS2	4.67799	0.000242435	0.0056963
PLK1	4.67625	0.0119176	0.0414568
C16orf58	4.66048	0.00429291	0.022511
TMEM97	4.65796	0.0164664	0.0507023
DRG2	4.65525	0.000861561	0.00993957
IQCK	4.65448	3.15831e-05	0.00269848
TNFRSF10B	4.6532	0.00431857	0.0225489
PRELID1	4.64831	0.00229362	0.0159422
NEFH	4.64361	2.21298e-05	0.00240111
SQLE	4.63174	0.00371002	0.0207551
CTSA	4.63066	2.14603e-05	0.00240111
MAGEC1	4.62564	0.000178792	0.00494878
IFT20	4.60965	0.000333172	0.00652355
MARS	4.60416	0.00380837	0.0211696
RAD23A	4.60217	0.00256671	0.0168966
CYP1A1	4.59755	0.00106086	0.0108464
TCP1	4.58651	0.0139948	0.0458167
ZDHHC12	4.57666	0.0104246	0.0382027
SLC20A1	4.5488	0.000418228	0.00707744
TRMT61B	4.54233	3.32666e-05	0.00278793
KIT	4.53678	0.00634654	0.0283
CT55	4.53333	3.11892e-05	0.00269848
DNAJC11	4.52087	8.06306e-05	0.00366225
AP1G2	4.51055	8.29011e-05	0.00367127
ITGA4	4.51019	3.0551e-05	0.00266623
NCAPG	4.50871	8.03403e-05	0.00366225
DNAJC7	4.50813	0.0099988	0.0372919
EMC4	4.49805	0.0344825	0.0838755
PAEP	4.49685	0.00563764	0.0262969
CKS1B	4.48399	0.0284744	0.0739269
PLIN2	4.48022	0.00405221	0.0218564
HBP1	4.47199	0.00284424	0.017876
KCNE4	4.46718	0.000364194	0.00679347
TVP23B	4.45268	0.000753279	0.00934375
KATNB1	4.42789	0.00198352	0.0146966
SRSF9	4.42377	6.32391e-05	0.00337519
RACGAP1	4.39877	0.00317062	0.0190051
LPCAT3	4.39273	3.00855e-05	0.00266623
MRPL4	4.38365	0.00243214	0.0164327
KXD1	4.37882	0.0044493	0.022918
HEATR1	4.37796	0.000223416	0.00550343
FBXO6	4.37708	0.001557	0.0129903
RNF123	4.37281	1.73971e-05	0.00223745
RIPK4	4.36051	0.000348035	0.00668735
JKAMP	4.35409	0.000590842	0.00825019
ITGB1	4.35116	0.000102216	0.00402593
FOXM1	4.34142	2.09762e-05	0.00240111
EIF3M	4.33624	0.00655769	0.0288312
NRSN2	4.33566	0.0074122	0.0310464
SAA1	4.3324	0.143919	0.23609
TMEM69	4.33202	0.00975612	0.0367501
PPID	4.3234	2.93251e-05	0.00266263
NTMT1	4.3159	0.0014678	0.0126026
PCSK7	4.3132	3.43756e-05	0.00280001
TSPAN31	4.31167	0.000560355	0.00799449
TMEM177	4.29544	0.000861828	0.00993957
LRRC59	4.28855	0.00161226	0.0131723
SPAG4	4.27617	0.00241676	0.0163862
SGSM3	4.26115	0.000538474	0.00783224
CERS2	4.25999	2.09673e-05	0.00240111
DIABLO	4.25665	5.82906e-05	0.00333924
DDOST	4.25374	2.11042e-05	0.00240111
C1QTNF3	4.24167	0.000662319	0.00876779
ZNF410	4.23804	3.37879e-05	0.00278793
SLC2A6	4.21712	0.000588044	0.00824637
HDHD2	4.21499	7.2265e-05	0.00353173
NUDT17	4.21166	3.57472e-05	0.00289245
SLC7A6OS	4.21023	2.35614e-05	0.00249772
ARFGAP2	4.19612	0.00200515	0.0147763
C19orf70	4.19158	0.0710505	0.139875
EME1	4.1877	8.3615e-05	0.00367485
ZP3	4.18535	5.97811e-05	0.00334242
HTRA2	4.18525	4.16192e-05	0.00312217
CCDC107	4.18474	0.00182952	0.0140145
TEX30	4.1613	0.0342668	0.0835672
ARMCX6	4.15675	3.76056e-05	0.00295689
TOMM34	4.15166	0.0251642	0.067395
ZFPL1	4.15102	0.0223744	0.0623333
RNF185	4.13515	0.00408798	0.0219643
TFB1M	4.13392	0.000314214	0.0062933
EEF1D	4.1271	3.38005e-05	0.00278793
AURKB	4.12078	0.0492442	0.107226
PPIL2	4.1156	0.000207808	0.00535653
IFRD2	4.11322	0.000435438	0.00716149
CENPM	4.11138	0.00439211	0.0227592
SLC16A13	4.10748	2.5946e-05	0.00252094
DPH1	4.09966	0.000422277	0.00711503
SH3BGRL3	4.09883	5.70748e-05	0.00333656
TTI2	4.09618	4.82245e-05	0.00316916
DHX16	4.09617	0.0119173	0.0414568
ETFB	4.091	0.00117172	0.0113743
CXorf40B	4.09096	0.00151401	0.0128574
METTL3	4.09003	0.00281956	0.0177858
IL1B	4.07873	0.0811123	0.153982
CLCC1	4.07698	0.000597812	0.00830829
BORA	4.07543	0.00114969	0.0112466
CENPN	4.06905	0.00640089	0.0284283
BIRC5	4.0644	0.0241895	0.0656188
PSMD7	4.05032	0.000287541	0.00608869
TECR	4.04928	0.000115261	0.00415414
CBWD2	4.04615	0.00326854	0.0193765
NCAPG2	4.03552	0.00965921	0.0365133
IGF2BP3	4.03477	4.88149e-05	0.00316916
STAG1	4.03343	5.84079e-05	0.00333924
LPXN	4.03292	0.0137909	0.0453802
HMGCL	4.02996	0.00659763	0.0289522
SERPINB2	4.02804	0.0765918	0.147626
RFC3	4.02701	0.0395887	0.0922719
GPC6	4.019	0.000102301	0.00402593
METTL18	4.01254	0.00334517	0.0196308
ENTPD6	4.00847	6.86482e-05	0.0034752
GOT1	3.99616	0.0230405	0.0635406
CCDC22	3.98594	0.00262125	0.0171631
RAB36	3.98372	0.000471084	0.00736024
DHCR7	3.9833	0.0019222	0.0144082
TCTN1	3.9799	0.0100092	0.0372919
PCDHGA12	3.97605	0.000412059	0.00704131
PBK	3.9714	0.0460578	0.102453
METTL17	3.96867	0.000436741	0.00716647
ADAM17	3.96834	0.00141633	0.012375
OGFOD2	3.96627	5.04928e-05	0.00316916
PCBP1	3.95714	0.000199689	0.00521062
RAMP1	3.95624	9.50353e-05	0.00394946
MSMO1	3.95349	4.81528e-05	0.00316916
TBC1D14	3.94811	5.18769e-05	0.00316916
PC	3.94694	5.12162e-05	0.00316916
C6orf47	3.94193	0.00177521	0.0137886
DDX49	3.93928	0.0160969	0.0500819
C19orf57	3.93674	0.00522721	0.0252184
SPATS1	3.93608	0.00172936	0.0136934
MRPL49	3.93021	0.0344145	0.0838131
ARAF	3.91967	0.0245875	0.0662864
TOE1	3.90603	0.00333349	0.0195905
ITLN2	3.90239	0.000522873	0.00770453
ATF6B	3.901	0.000729413	0.00926623
HPS3	3.88677	0.000557652	0.00798757
SPRYD3	3.87817	0.0167803	0.0513069
ANKRD37	3.87796	4.65796e-05	0.00316916
COL19A1	3.8779	0.000732486	0.00926623
AURKA	3.87691	0.0153323	0.0487967
ADGRE5	3.87396	0.00662605	0.0290273
HILPDA	3.87393	0.000701891	0.00910371
ELMO2	3.8735	0.00981708	0.0368835
SSB	3.85833	0.00681469	0.0295171
SEMA3A	3.84605	3.65282e-05	0.00289912
HSD17B7	3.84584	0.0100596	0.0374262
C7orf49	3.84234	0.002371	0.0162291
LGALS12	3.83607	7.10348e-05	0.00351378
AP4M1	3.82873	0.000375593	0.00682172
MRPS11	3.82785	0.00362764	0.0205645
TOMM40L	3.82031	0.000368589	0.00682172
DOLPP1	3.81406	0.004018	0.0217896
ZCCHC17	3.8051	0.0110377	0.0396062
PSMC3IP	3.80381	0.000334044	0.00653017
PIGF	3.80328	0.00077157	0.00948394
WDR6	3.80155	0.000819841	0.00979161
ZNF770	3.80128	0.000216952	0.0054574
BNIP3	3.79794	0.0143086	0.0464091
TMLHE	3.79416	7.66557e-05	0.00361909
KRT79	3.78939	0.000164099	0.00480335
BRF2	3.786	0.000296239	0.00619768
MDFI	3.78314	0.000273838	0.00592997
LENG1	3.78028	0.00113752	0.0111929
C6orf223	3.77949	7.15342e-05	0.00352421
STK19	3.77412	0.00021501	0.00545018
TFRC	3.774	0.000752625	0.00934375
C17orf53	3.77198	0.000863143	0.00993957
MPPE1	3.76869	4.14654e-05	0.00312217
GFM2	3.7656	0.00481285	0.0240729
FIP1L1	3.76299	0.00553629	0.0260469
NSDHL	3.76197	0.000896164	0.0101195
CAMTA2	3.76102	0.000150527	0.00466729
CCNE2	3.75663	0.000108752	0.00402593
KIF2C	3.75309	0.0356146	0.0856528
ST6GALNAC2	3.74081	0.00275278	0.0175529
ARAP1	3.73325	6.82993e-05	0.0034752
MVD	3.73245	6.02523e-05	0.00334242
MAGEA10	3.73081	0.0011452	0.0112127
INSIG2	3.73052	0.0180205	0.0539049
CDC20	3.7259	0.00115513	0.0112817
IL1RAPL1	3.71944	0.000610317	0.0083666
NRM	3.70815	0.00248052	0.0165884
TRPT1	3.69896	0.00985028	0.0369514
TANGO2	3.69487	0.0119418	0.0415092
PMM2	3.69422	0.00829739	0.033117
C16orf70	3.69159	0.000265062	0.00592997
CCDC28B	3.68967	0.00384389	0.0212595
TMSB15A	3.6873	4.88881e-05	0.00316916
ETFRF1	3.67713	0.000993579	0.0105195
HEXIM2	3.67527	5.80365e-05	0.00333924
ASL	3.67355	0.00502166	0.024656
CYTL1	3.67047	0.0435477	0.0987502
LCN1	3.66895	8.66252e-05	0.00372671
PPP1R36	3.66828	5.10472e-05	0.00316916
SKA3	3.66639	0.00932007	0.0356075
BAIAP2L2	3.66321	0.000512887	0.0076607
ANKMY2	3.6609	0.0222937	0.0621739
MED15	3.6597	0.00109488	0.0109953
NIPA2	3.65452	0.0125971	0.0428485
MMP8	3.65139	0.000271317	0.00592997
COX20	3.64859	0.0136982	0.0452216
GPATCH3	3.64128	0.0057118	0.0265147
ACOT13	3.64104	0.00100215	0.0105736
PMAIP1	3.63984	0.0171575	0.0521469
EXOSC8	3.63771	0.0011183	0.0111036
ORC5	3.62746	0.0189209	0.0556346
SNUPN	3.62735	0.0396447	0.0923507
COQ6	3.62301	0.0235801	0.0645246
MMS19	3.62035	0.0340425	0.0831363
SLC25A19	3.61792	8.45634e-05	0.00370321
FAP	3.60674	0.000494338	0.00754035
LGALS8	3.605	0.0414215	0.0953983
ZNF408	3.59698	0.00431849	0.0225489
WDR83	3.59602	0.0143509	0.0465215
AGA	3.58661	0.0404492	0.0937243
KIFC1	3.58321	0.0001528	0.00466729
EMC9	3.58206	0.0025	0.0166367
ZNF595	3.57844	0.00408243	0.0219539
HIST1H1C	3.57749	0.0531803	0.11339
TK1	3.55963	0.00181124	0.0139444
ART3	3.55022	7.76982e-05	0.00361954
ZNF490	3.54873	0.000121406	0.00423812
C1orf112	3.54847	0.000139012	0.00454997
NOL12	3.54839	0.0216651	0.0610621
ADAT1	3.54796	0.00853196	0.0337808
VPS37B	3.54732	0.000594693	0.00829447
APOO	3.54696	0.0188849	0.0555856
SLC22A18AS	3.54627	0.00382723	0.0212261
NUF2	3.54031	0.0475421	0.104524
C16orf89	3.53955	0.000952059	0.0103966
ANKZF1	3.53787	0.0300432	0.0768205
MIF	3.53575	0.00413573	0.022114
DYNC1LI2	3.53521	0.0024402	0.0164337
ZNF287	3.53213	0.00140081	0.0122978
RPE	3.53093	0.0321577	0.0801315
ZNF880	3.52713	0.00636671	0.0283486
RAB1B	3.52645	0.0162973	0.0504614
RELL1	3.52081	0.00293991	0.018224
RAB17	3.51723	0.00118383	0.0114431
TIPIN	3.51009	0.0020134	0.0148102
EFTUD2	3.5089	0.00325084	0.0192997
RCC1	3.50693	0.000817729	0.00978948
TSTA3	3.50463	0.0455919	0.101756
PIGB	3.50349	0.000514126	0.00766983
TBCCD1	3.4936	0.00237381	0.0162392
FANCA	3.48685	0.00103365	0.0107209
GAGE12H	3.47941	0.000256626	0.00587163
CREB3L4	3.47936	0.00135786	0.0121898
RAD54L	3.47568	0.000315047	0.0062933
CBY1	3.47011	0.0614842	0.126
TEAD2	3.46876	0.000341336	0.00659881
IPPK	3.46809	7.18963e-05	0.00352783
ZNF28	3.46566	0.00349491	0.0201895
L3MBTL2	3.4655	0.027929	0.0729293
SMARCC2	3.46545	0.0133968	0.0445521
MIF4GD	3.45817	0.00516392	0.0250368
DHX38	3.45745	8.32053e-05	0.00367127
SLC12A8	3.45283	0.000164551	0.00480335
CDCA5	3.44606	0.0162906	0.0504533
ZNF468	3.44589	0.00247561	0.0165646
CHPF2	3.44147	0.0150931	0.0482615
SLC35G2	3.44108	0.00305028	0.0185507
CXorf40A	3.43932	0.000536778	0.00781686
MRPS18C	3.43433	0.0338145	0.0828112
MAGEC2	3.43308	0.000316256	0.00630346
QPCTL	3.42209	0.0188593	0.0555638
HDDC3	3.42206	0.00010694	0.00402593
CES2	3.42205	0.00191194	0.0143489
DFNA5	3.4215	0.0310593	0.0783892
LCP1	3.42109	0.00668756	0.0291921
ZC3HC1	3.4198	0.0474273	0.104371
MCM2	3.41879	0.000912424	0.0102033
NT5C2	3.41207	0.0103264	0.0380367
RAD51	3.41197	0.00532236	0.0254901
MILR1	3.40858	0.000164209	0.00480335
PRPF4	3.40592	0.0592868	0.122764
MAD2L1	3.40483	0.0174454	0.0527333
ABCC10	3.40058	0.00433157	0.0225878
SEC61A2	3.39862	0.00401426	0.0217869
PEX10	3.39612	0.00213568	0.0152951
SLC39A7	3.38942	0.000108403	0.00402593
HK1	3.38907	8.22448e-05	0.00367127
UBAP1	3.38599	0.0138632	0.0455296
NUP188	3.38295	0.000477271	0.00740012
CCDC134	3.38132	0.000431752	0.00716149
PSKH1	3.37629	0.00301039	0.0184366
PRIMPOL	3.37499	0.00021983	0.0054574
KDELR3	3.37376	0.00168286	0.0134633
PIP5K1B	3.3731	0.000109411	0.00402593
HOXA4	3.3715	8.87258e-05	0.0037674
PISD	3.36434	0.00469456	0.0237705
TBC1D10A	3.36356	0.00661384	0.0289842
RTN4IP1	3.3611	0.00692962	0.0298525
LBHD1	3.35519	0.00042533	0.00712084
CA6	3.35125	7.73108e-05	0.00361909
SC5D	3.34798	0.000501666	0.00759823
NDUFAF4	3.34787	0.0553098	0.116797
TMEM234	3.34489	0.0234868	0.0643991
FAM60A	3.34281	9.2032e-05	0.00385673
XRCC6	3.34273	0.000162649	0.00480335
PPP5C	3.34042	0.0175138	0.0528355
NOSIP	3.34016	0.000112095	0.00407611
TBC1D19	3.33906	0.000724091	0.00923481
MECR	3.33631	0.0379043	0.0895774
RPAIN	3.33413	0.00350613	0.0202085
TPSAB1	3.32958	0.000167847	0.004856
AZI2	3.32952	0.00425675	0.0224055
TRIB3	3.32844	0.0205515	0.0588526
ARHGDIA	3.32299	0.000238975	0.00565181
INTS8	3.32133	0.00357915	0.020425
TPX2	3.31038	0.0116675	0.0409983
UFSP2	3.30386	0.0409043	0.0945278
ZNF77	3.30332	0.000252054	0.00581265
TRAF2	3.30255	0.0109493	0.0393844
ABCF2	3.30189	0.00478414	0.0240129
ABHD10	3.29965	0.00161012	0.0131723
PQLC2	3.29803	0.00635664	0.0283244
CDC26	3.29673	0.000107357	0.00402593
PKMYT1	3.29613	0.00235902	0.0161833
INPP5B	3.29443	0.00322593	0.0192266
OSGIN1	3.28665	0.0112309	0.0399657
PLA2G4A	3.28022	0.0071953	0.0305357
IARS	3.27816	0.00805609	0.0326141
XYLB	3.27772	0.000432459	0.00716149
ZNF415	3.2772	0.000314689	0.0062933
ANKFY1	3.27463	0.00274779	0.0175405
ST5	3.26898	0.000582149	0.00819435
UBQLN4	3.26593	0.00439239	0.0227592
SPC25	3.26433	0.00248451	0.0165969
PES1	3.26095	0.000110252	0.00402593
KYAT1	3.25996	0.00343037	0.0199487
POLR2C	3.25991	0.0696001	0.13807
SHCBP1	3.25939	0.000711946	0.00914674
CLP1	3.25891	0.0283877	0.0737704
P4HA2	3.25768	0.00132623	0.0120565
IFT122	3.2567	0.00267911	0.0173158
PDHA1	3.2551	0.00153844	0.0129211
DOLK	3.25472	0.000105767	0.00402593
STK11IP	3.25019	0.022693	0.0628858
SLC25A45	3.24763	0.00167438	0.0134589
MGST1	3.24493	0.000257831	0.00587719
RFC2	3.24413	0.00565035	0.0263295
C8orf88	3.24087	0.000109855	0.00402593
INTS7	3.23764	0.0153009	0.0487601
MAN1B1	3.23631	8.52465e-05	0.00370656
MINK1	3.23484	0.00157252	0.0130346
MYBBP1A	3.23319	0.024334	0.0658792
PTCD1	3.22922	0.00727809	0.0307057
XRCC1	3.22795	0.000524394	0.00770453
ZNF695	3.22413	0.000310372	0.0062933
RLF	3.2206	0.010109	0.0375333
SNAI1	3.21897	0.0142331	0.0462501
TPRKB	3.21395	0.110925	0.193667
IFITM1	3.21201	0.111719	0.194887
C17orf80	3.21124	0.000788121	0.00961005
AMPD2	3.21071	0.0330208	0.0815989
FAIM	3.20565	0.0191668	0.0561313
PDK2	3.20479	0.000441626	0.00720399
MOSPD1	3.20453	0.0313517	0.0788341
STYXL1	3.2032	0.0244044	0.0659528
COQ9	3.20181	0.0673347	0.134625
TRIT1	3.20045	0.031561	0.0791006
SQSTM1	3.19374	0.00348941	0.0201673
MIIP	3.19362	0.0129802	0.0435332
CDCA7L	3.18531	0.000403149	0.00698983
PIGU	3.181	0.00792253	0.032292
PIGH	3.17909	0.0475821	0.104561
DNAJC2	3.17862	0.0133573	0.0444684
PGAP2	3.1758	0.05397	0.114719
POLD2	3.17392	0.000147147	0.00462171
SUV39H1	3.17261	0.00965404	0.0365133
HEY1	3.172	0.00595673	0.0271728
ZFP82	3.17027	0.0024914	0.0166247
FAM162A	3.16926	8.91079e-05	0.0037674
GLA	3.1666	0.0344563	0.0838755
KYAT3	3.16417	0.0394222	0.0920562
SELENOT	3.16152	0.0177626	0.0533711
COL9A3	3.15857	0.0731112	0.142747
DDIAS	3.15827	0.0059077	0.0270359
TRAP1	3.15629	0.00446735	0.0229874
NAGA	3.15436	0.00817783	0.0328782
AREL1	3.15227	0.0278176	0.0727161
PLOD1	3.14888	0.000123152	0.00427843
EIF3C	3.14819	0.00016812	0.004856
EPHA3	3.14571	0.00179873	0.0139104
PHLDB1	3.141	0.000310137	0.0062933
BSDC1	3.14018	0.0869172	0.161661
MCM5	3.13805	0.000382771	0.0068775
KPNA2	3.13397	0.000600228	0.00830829
CLSPN	3.1309	0.00465246	0.0236283
ZNHIT3	3.13063	0.0141547	0.0461057
RNF214	3.12802	0.000362904	0.00677976
CCNF	3.12684	0.000125829	0.00431962
TUBGCP4	3.12332	0.00160187	0.0131353
RABGEF1	3.12191	0.000221663	0.00547126
NARS2	3.11978	0.0602466	0.124138
FADS2	3.11904	0.00997382	0.0372319
TESK2	3.11304	0.00854937	0.0338046
CEP70	3.11183	0.00585995	0.0269006
C8orf59	3.10472	0.12361	0.210373
DKC1	3.10349	0.0441729	0.099742
CEP85	3.09773	0.0101732	0.0377029
COASY	3.09697	0.00216503	0.0154151
CLPB	3.09521	0.00790702	0.0322735
SLC25A15	3.09472	0.0114134	0.0403492
LHFPL1	3.09119	0.000173596	0.00490898
MBOAT1	3.08747	0.000169895	0.00487271
PDCD10	3.08683	0.0391482	0.0916483
GCHFR	3.08477	0.000247624	0.00574549
SUPV3L1	3.08354	0.000377961	0.00685152
LRWD1	3.08235	0.0332475	0.0819484
GAS8	3.08146	0.0339443	0.0830127
SGTA	3.08145	0.000119083	0.00422628
TDRKH	3.07703	0.00196635	0.0146177
WFS1	3.07492	0.000556328	0.00797796
NCAPH	3.07383	0.0424126	0.0970399
SNX11	3.07347	0.0275325	0.0721716
HSPA5	3.07177	0.000120861	0.00423118
DNASE2B	3.06862	0.00130699	0.0119527
IDI1	3.06846	0.000304814	0.0062803
MTUS1	3.06594	0.00112181	0.0111072
SLC43A3	3.06401	0.000130332	0.00438877
MRPL19	3.06328	0.0353599	0.0853135
TTK	3.06217	0.0036137	0.0205454
MRPL47	3.05854	0.0092811	0.0355343
TRIM16	3.05713	0.011084	0.039704
RIOK3	3.05713	0.0241719	0.0656148
ANAPC15	3.05633	0.00271959	0.0174856
RP11-398C13.8	3.05539	0.000103533	0.00402593
TMEM45A	3.05463	0.000123962	0.00427843
SCAMP3	3.05356	0.0022137	0.0156531
DDX39A	3.0518	0.000339959	0.00659304
CTU2	3.04895	0.0245242	0.0661887
WDR73	3.04763	0.0157529	0.0495161
RAB8A	3.04564	0.00578311	0.026708
C18orf8	3.0433	0.00512497	0.0249172
FAM109B	3.0431	0.0241223	0.0655384
TPSD1	3.0393	0.000140411	0.00456261
TMEM17	3.03732	0.0115892	0.0407941
NRBF2	3.03058	0.071875	0.141067
SARS2	3.02967	0.0586168	0.121799
PSMD4	3.02949	0.000793154	0.00963707
KIF20A	3.02823	0.06753	0.134883
ZNF473	3.02476	0.011599	0.0408169
MYO19	3.02372	0.00263779	0.0171886
TBC1D22A	3.01577	0.0100112	0.0372919
GRIK2	3.01465	0.00103775	0.0107451
RPAP1	3.00948	0.0146261	0.0471631
EIF4H	3.00724	0.00152875	0.0128904
ACY3	3.00711	0.00014243	0.00460219
EXOSC2	3.00682	0.0210051	0.0596561
EXOC7	3.00606	0.000955725	0.0103966
UCHL1	3.0048	0.00137941	0.0122483
IL27RA	3.00447	0.0127316	0.0431019
ALKBH2	3.00407	0.0291786	0.0751485
CLCN2	3.00358	0.000325588	0.00640585
CRCP	3.00151	0.0627939	0.127678
EXO5	3.00026	0.000395552	0.00697886
NR0B1	2.99906	0.00653114	0.0287766
FARSA	2.99685	0.00356093	0.0203877
DTX4	2.99241	0.00690615	0.0297739
PSMD2	2.99133	0.000235813	0.00561631
FAM120B	2.99021	0.0639129	0.129136
AGMO	2.98972	0.0284877	0.0739301
FAM210A	2.98353	0.0662871	0.13301
PTN	2.98258	0.00389942	0.0214119
C1GALT1	2.98055	0.0167698	0.0513069
ZNF841	2.97889	0.000981613	0.0104791
WDR25	2.97544	0.00988409	0.0370023
ASF1B	2.97515	0.00016131	0.00480335
FAF2	2.97402	0.0243325	0.0658792
GSKIP	2.97317	0.0153405	0.04881
TSSC1	2.97212	0.0220602	0.0617059
GEMIN7	2.97009	0.046687	0.103435
CNN2	2.96967	0.00892706	0.0347323
TMEM255B	2.96906	0.000793545	0.00963707
CDK5	2.96903	0.00215162	0.0153482
PFAS	2.96658	0.0361014	0.0865229
LSM12	2.96514	0.000867852	0.00996704
MAOB	2.96306	0.124744	0.211688
NFKBIL1	2.96271	0.0605861	0.124648
TTLL1	2.96168	0.000708188	0.00913241
TLDC1	2.96082	0.011969	0.0415411
BPHL	2.95897	0.0140521	0.045906
USO1	2.95707	0.0390357	0.091466
PYROXD2	2.95655	0.00013111	0.00438877
PDIA5	2.95433	0.0423362	0.0968841
PLPP7	2.95244	0.0304011	0.0773673
CENPL	2.95197	0.0125232	0.0426801
TUBB3	2.94624	0.0105887	0.0385151
AARS	2.94432	0.000319952	0.00632499
ALG1L	2.94381	0.000338157	0.00656853
CDC42SE1	2.94258	0.0618016	0.126417
TCIRG1	2.93799	0.0080139	0.0325187
DAAM2	2.93763	0.000303819	0.0062803
THAP1	2.93307	0.0229436	0.0633502
MFSD5	2.9325	0.000243532	0.00571108
KLHL22	2.93162	0.0163072	0.0504633
SUV39H2	2.93102	0.0087601	0.0342609
NUP88	2.93045	0.0438523	0.0992087
FBXO36	2.92882	0.00754076	0.0313815
RIBC2	2.92874	0.00135005	0.012183
CDK2AP1	2.92718	0.00180927	0.013938
METAP1	2.92343	0.0466903	0.103435
TUT1	2.92215	0.0203163	0.0584244
EED	2.92208	0.0825517	0.155771
FOPNL	2.92141	0.0256683	0.0684302
PPAT	2.91953	0.0750073	0.145292
NUMA1	2.91793	0.00092885	0.0102653
CKLF	2.9169	0.0286794	0.0742697
SMIM20	2.91629	0.0656763	0.132121
KRT12	2.91131	0.00192401	0.014413
ZNF574	2.91048	0.0112577	0.0399962
ZNF32	2.91026	0.00402596	0.021793
MND1	2.9091	0.00466976	0.0236645
RPN1	2.90803	0.000194399	0.00521031
MNS1	2.90768	0.00346806	0.0200914
NPRL3	2.90757	0.0314811	0.0789808
SAA2	2.90459	0.147268	0.24038
RFC5	2.9034	0.00552099	0.0259944
C21orf2	2.90042	0.00443674	0.0228919
CEP19	2.89964	0.0506564	0.109582
MKS1	2.89782	0.0379493	0.0896317
C1orf131	2.89608	0.0358613	0.086098
RITA1	2.89493	0.0466667	0.103423
ZNF521	2.89468	0.00225679	0.0158188
TMEM173	2.8914	0.0651877	0.131365
GLB1L	2.88921	0.00388968	0.0213828
TTC38	2.88814	0.0014297	0.0124259
WDR53	2.8869	0.0140157	0.0458302
FUZ	2.88393	0.00453619	0.023248
WDR45	2.88319	0.00733943	0.0308898
WDR3	2.88271	0.045598	0.101756
CBR3	2.88228	0.028203	0.0733781
TATDN1	2.87993	0.058909	0.122152
TRAF7	2.87922	0.0272657	0.071664
APTX	2.87921	0.00482232	0.0240742
TMEM199	2.87859	0.0461891	0.102607
RP11-27I1.4	2.87815	0.00190806	0.0143374
TIMELESS	2.87623	0.0232859	0.0640204
PTCHD4	2.87437	0.00213716	0.0152951
EXOSC9	2.8722	0.00113426	0.0111851
ZNF160	2.87088	0.0303821	0.0773522
LCMT1	2.86724	0.00713254	0.0303748
ZNF669	2.8647	0.007541	0.0313815
YARS	2.86159	0.00234325	0.0161026
NDEL1	2.86105	0.0898839	0.165816
TMEM39A	2.86002	0.0433621	0.0984571
UBE2S	2.85844	0.0126986	0.0430617
ISCA1	2.85814	0.0662816	0.13301
LBR	2.8578	0.0323309	0.0803537
WNK4	2.85391	0.0218767	0.0614882
ZNF649	2.85307	0.00363611	0.0205645
TUBG2	2.85112	0.138521	0.229423
CCDC163	2.84989	0.00275548	0.0175529
PMPCA	2.84827	0.000217428	0.0054574
ZNF140	2.84601	0.00114531	0.0112127
RNASE4	2.8452	0.0288936	0.0745446
STC2	2.84192	0.00417316	0.0222169
PYCRL	2.8415	0.00425994	0.0224055
RBX1	2.84031	0.0452359	0.101207
APIP	2.83867	0.0171926	0.0522173
ORC6	2.83524	0.137959	0.228646
GNPNAT1	2.83276	0.0212615	0.0601606
SPHK2	2.82912	0.00206092	0.0149794
PRMT1	2.82688	0.000234083	0.00558599
LMLN	2.82531	0.0162473	0.0503704
DHRS7	2.82392	0.00664696	0.0290983
NUFIP1	2.82033	0.0371874	0.0883617
CTSV	2.8196	0.00332186	0.0195566
C9orf116	2.81853	0.00159309	0.0131133
ACTB	2.81751	0.00128448	0.0118354
GBE1	2.81732	0.000271937	0.00592997
H3F3A	2.81133	0.00340744	0.0198248
TTC26	2.81119	0.0277847	0.0726669
DNALI1	2.81099	0.000268205	0.00592997
COQ8B	2.81069	0.00162439	0.0132224
BRMS1	2.80975	0.00863707	0.0340069
ST3GAL1	2.80944	0.00810685	0.0327328
CHORDC1	2.80885	0.0473896	0.104344
PSEN1	2.80747	0.0418019	0.0959813
CSGALNACT1	2.80705	0.0328277	0.0813225
SERINC2	2.80655	0.0555528	0.117106
STIP1	2.80589	0.000435504	0.00716149
EIF1AD	2.80435	0.0685224	0.136553
DDIT4L	2.80424	0.00109917	0.0110181
RRP7A	2.79567	0.0219305	0.0615688
CD96	2.79423	0.000378917	0.00685868
MRPL38	2.79291	0.00789614	0.0322597
ZER1	2.79274	0.00675734	0.0294021
CD36	2.79268	0.0361086	0.0865229
BCCIP	2.79264	0.0209688	0.0596055
WDHD1	2.79257	0.0111815	0.0399226
SMG8	2.79217	0.0347761	0.0843046
IQGAP2	2.7889	0.0199371	0.0576549
TWNK	2.78827	0.00560639	0.0262113
FAM64A	2.78564	0.0198025	0.0573936
HENMT1	2.78264	0.00494668	0.0244591
UBR7	2.78156	0.0538336	0.114549
APEX2	2.78034	0.088977	0.164491
XRCC4	2.77815	0.0444294	0.100099
ARHGEF39	2.77774	0.000209659	0.00539287
NTAN1	2.77769	0.0598674	0.123599
UQCC1	2.77515	0.0476206	0.104589
MSH2	2.77503	0.0455055	0.101587
ACAA1	2.77302	0.00227396	0.0158943
LRGUK	2.77268	0.001633	0.0132546
CDCA8	2.77246	0.0023021	0.0159626
CLIC1	2.77173	0.000229129	0.00555457
ATG9B	2.7701	0.00055601	0.00797796
JMJD4	2.7672	0.108919	0.19112
DNAJC9	2.76578	0.00434865	0.022621
HMG20A	2.76147	0.000353643	0.0067323
UFD1L	2.7608	0.000961723	0.010417
CSAG3	2.75873	0.000473897	0.00738529
PRICKLE3	2.75696	0.00144389	0.0125117
ECE2	2.75476	0.0154126	0.0488853
PSMC6	2.75352	0.00282807	0.0178202
POPDC3	2.75214	0.0733788	0.14308
VIPAS39	2.75076	0.0208418	0.0593718
MINDY1	2.7468	0.0102946	0.0379653
LMAN2L	2.74622	0.0146253	0.0471631
UTP14A	2.74616	0.0368457	0.0878495
ZNF18	2.74592	0.00176961	0.0137886
SDSL	2.74475	0.0778376	0.149484
RCC2	2.74175	0.0260126	0.0690768
CYB5D2	2.73962	0.0492479	0.107226
CSAG2	2.73913	0.000628033	0.00848818
TWF1	2.73486	0.00151296	0.0128574
OIP5	2.73094	0.0319432	0.079845
PQBP1	2.72914	0.0199014	0.0575787
STARD4	2.72762	0.000262621	0.00592997
CLEC2B	2.72569	0.109894	0.192417
MFSD2A	2.72486	0.00327497	0.0193958
TRIM51	2.72269	0.00978811	0.0368399
ZNF766	2.72187	0.00117646	0.0113833
C16orf59	2.72071	0.043422	0.0985566
TMED1	2.71894	0.00495461	0.0244681
SRPRB	2.71803	0.00987031	0.0369925
TIMM17A	2.7175	0.0160668	0.0500562
GPR3	2.7123	0.0103789	0.0381639
UPK1A	2.71221	0.0160722	0.0500562
NCEH1	2.70982	0.00490336	0.0242907
CCDC59	2.70933	0.08766	0.162622
BCAP31	2.70847	0.000198412	0.00521062
TMEM53	2.70786	0.0537098	0.114325
GNL2	2.70655	0.00150659	0.0128347
ENTPD7	2.7052	0.00238043	0.0162655
TCTN3	2.70429	0.00354309	0.0203715
TSTD2	2.7022	0.00466093	0.0236296
ADORA2A	2.70117	0.000220208	0.0054574
IL13RA2	2.7011	0.0146136	0.0471479
RHOU	2.69899	0.00336784	0.0196976
HIST1H4H	2.6979	0.000929212	0.0102653
SLCO4A1	2.69576	0.0118132	0.0412383
HS6ST2	2.69355	0.000313896	0.0062933
FNTB	2.69206	0.000734278	0.00926798
PDSS2	2.69165	0.0334145	0.0822048
ZNF565	2.69065	0.000231506	0.00557298
PDE4C	2.6906	0.000736453	0.00927298
HIST1H1E	2.69009	0.0411407	0.0948588
TIMM8A	2.68881	0.0339938	0.0830733
CYP26A1	2.68856	0.00617549	0.0277943
PARN	2.68852	0.0113248	0.0401527
MPHOSPH6	2.68851	0.164881	0.261387
EXO1	2.68833	0.000401139	0.00698983
COPG1	2.68779	0.000475841	0.00739673
HMGCR	2.68679	0.000252416	0.00581265
RELL2	2.68675	0.00205112	0.0149722
CYB5B	2.68624	0.000358266	0.00675509
LIF	2.68406	0.00581401	0.0267655
HMGB3	2.68255	0.0252627	0.0675996
NRBP1	2.68171	0.000499413	0.00758772
DNTTIP2	2.67988	0.00620122	0.0278754
GTSE1	2.67954	0.00923493	0.0355343
IBTK	2.67807	0.0863517	0.160928
MAGT1	2.67565	0.0512292	0.110489
PSMC3	2.67532	0.000779823	0.00953721
GPATCH8	2.67495	0.0166479	0.0510523
MIEF1	2.67471	0.0800642	0.152452
MORN4	2.67307	0.0296471	0.0759867
AKTIP	2.67039	0.00325395	0.0193088
COL8A1	2.66777	0.0112252	0.0399657
MUL1	2.66687	0.000369895	0.00682172
HIRIP3	2.66672	0.0804882	0.153122
TFR2	2.66592	0.00155995	0.0129903
XRRA1	2.66465	0.0201304	0.0581037
BTBD19	2.66403	0.000883705	0.0100719
THOP1	2.66214	0.0410641	0.0947718
DHX35	2.65664	0.0567158	0.118942
FANCB	2.65464	0.00781169	0.0320817
SLC36A1	2.654	0.00739953	0.0310455
GTF3C5	2.65382	0.00188076	0.014211
CSTF2	2.65322	0.0138984	0.0455869
CDKN3	2.65139	0.0555132	0.117055
NDOR1	2.65035	0.00594079	0.0271408
GEMIN4	2.65014	0.000925174	0.0102575
DEPDC1	2.64677	0.00863951	0.0340069
KIN	2.64658	0.016014	0.0500215
YIPF1	2.64486	0.0813933	0.154359
BYSL	2.64477	0.0226411	0.0628274
ATG9A	2.64447	0.000509861	0.00764714
DDX56	2.64322	0.00189323	0.0142787
PLXNB3	2.6431	0.00240632	0.0163566
PCCA	2.64044	0.0031486	0.0189132
FTSJ1	2.64009	0.0214069	0.0604459
ZMYM1	2.63987	0.00976054	0.0367501
C1orf174	2.63959	0.0482523	0.105616
ZMPSTE24	2.63851	0.0294656	0.0756646
DNAJA3	2.63834	0.055884	0.117621
GALE	2.63722	0.00054996	0.00791757
ZNF22	2.6367	0.151641	0.246049
POLA1	2.63528	0.0277317	0.0726005
MBTPS1	2.63377	0.000303042	0.0062803
PELO	2.6331	0.0466971	0.103435
MEF2A	2.63277	0.0674084	0.134707
PEPD	2.63237	0.0746093	0.144902
CCDC189	2.63095	0.00664702	0.0290983
FADD	2.63082	0.00581174	0.0267651
TMEM161A	2.62888	0.000992401	0.0105162
THAP8	2.62741	0.0586595	0.121867
AMN1	2.62715	0.00190608	0.0143314
MRPS7	2.62369	0.000309354	0.0062933
CAP2	2.62098	0.0198695	0.0575192
STC1	2.61873	0.0632992	0.1283
ARHGEF19	2.61742	0.00205504	0.0149722
SYCE2	2.61527	0.00330526	0.0195083
UBR4	2.61419	0.000814629	0.00977715
RRP1	2.61361	0.0127571	0.0431402
KRI1	2.61266	0.0334314	0.0822048
PEX16	2.61103	0.000665944	0.00876779
BCAS3	2.61022	0.000270857	0.00592997
COG5	2.60913	0.021903	0.0615222
PRPF40B	2.60845	0.00125809	0.0117198
DCTN4	2.60753	0.0467811	0.103523
ELK1	2.60691	0.0472179	0.10406
PPWD1	2.6069	0.0987117	0.177623
ACSBG1	2.60549	0.00187937	0.014211
TMEM243	2.60516	0.0826988	0.155904
HIST1H3D	2.6049	0.0128426	0.0433305
SLC2A10	2.60388	0.0710045	0.139865
GNE	2.60381	0.0357195	0.0858251
TRIM48	2.60068	0.00102849	0.0107036
DHRS3	2.60039	0.000273024	0.00592997
MKLN1	2.59862	0.00903269	0.0349577
RGS5	2.59674	0.00600588	0.0273092
TMEM143	2.59671	0.0544344	0.115525
AAMP	2.59351	0.00866922	0.034069
TRAIP	2.59338	0.036109	0.0865229
BUB1B	2.59332	0.0507985	0.10977
TOM1L1	2.5926	0.00162003	0.0132045
LRRC46	2.5923	0.00140645	0.0123183
RFC4	2.59165	0.00368264	0.0206967
EMC1	2.59025	0.000452434	0.00725828
DYNLT3	2.58913	0.00107096	0.0108973
TMEM184C	2.58797	0.0748591	0.145198
ARMC9	2.58787	0.0703077	0.139022
NMD3	2.58736	0.0383627	0.090322
ATG13	2.58661	0.000979591	0.0104791
RAP1GAP	2.58471	0.0484737	0.10592
TOP3A	2.58467	0.000274221	0.00592997
ADAMTS4	2.5819	0.0212149	0.0600426
KRIT1	2.58165	0.0289522	0.0746282
FASTKD2	2.58091	0.000491272	0.00752694
CD320	2.58002	0.0205323	0.0588192
TPMT	2.57866	0.0478565	0.104976
F12	2.5773	0.00104732	0.0107894
PEX11B	2.57712	0.051963	0.111657
NASP	2.57614	0.0491739	0.107134
CCZ1B	2.57439	0.000851011	0.00990253
GSTT2B	2.57377	0.00310547	0.0187186
PUSL1	2.57301	0.0294475	0.0756646
MAGED1	2.57231	0.00128044	0.011816
ACSS2	2.57024	0.0329162	0.0814111
DPP3	2.56946	0.000445691	0.00722208
MCOLN1	2.56945	0.0488045	0.106462
TMEM231	2.56939	0.0571805	0.119629
ZNF614	2.56858	0.00841578	0.0334606
HJURP	2.56835	0.00615247	0.0277546
PCYT1A	2.56673	0.0437275	0.0990476
GBF1	2.56634	0.0031786	0.019028
BMS1	2.5624	0.0245358	0.066191
AP2A1	2.56183	0.00422131	0.0223176
C11orf70	2.56097	0.00224473	0.0157764
RIOK2	2.56078	0.0600206	0.123853
TMEM241	2.55956	0.00892896	0.0347323
TM7SF2	2.55832	0.00752402	0.0313604
ALG11	2.55773	0.00843735	0.0335244
FEN1	2.55771	0.00152356	0.0128695
PNPLA3	2.55762	0.0243968	0.0659528
STOML1	2.55755	0.00625533	0.0280009
THOC6	2.55358	0.00857341	0.0338668
KIF15	2.55346	0.00524774	0.0252927
ASF1A	2.55344	0.0356889	0.0857685
POT1	2.55221	0.0571428	0.119598
ARCN1	2.55039	0.00277209	0.0176093
ZNF34	2.55027	0.00165418	0.0133405
RETSAT	2.54832	0.0574477	0.119962
BCAT2	2.5478	0.0515081	0.110898
LYRM1	2.5448	0.00411984	0.0220773
UBOX5	2.54375	0.00282997	0.017823
PDGFRL	2.54363	0.00635324	0.0283196
SCML4	2.54294	0.00401572	0.0217869
ZNF543	2.54198	0.00110282	0.0110445
MRPL20	2.54179	0.0102334	0.0378424
PRKAR1B	2.54013	0.0174062	0.0526407
INVS	2.53877	0.00701732	0.0300834
TBCE	2.53657	0.0567474	0.118955
OTUB1	2.53344	0.000303837	0.0062803
CBLL1	2.53091	0.0160912	0.0500771
MRNIP	2.52646	0.000946762	0.0103772
SCAMP1	2.52585	0.0622182	0.12693
SPESP1	2.52299	0.0256061	0.068294
VPS72	2.52257	0.0286779	0.0742697
ZNF845	2.52168	0.025733	0.0685452
MRGPRX4	2.52098	0.0029482	0.0182385
ADA	2.51902	0.0456331	0.101798
MLLT11	2.51774	0.0101575	0.0376758
USP10	2.51731	0.000973952	0.0104578
ZCCHC6	2.51685	0.0185423	0.0549477
USP4	2.51555	0.0176134	0.0530662
CCDC66	2.51532	0.0104156	0.0381811
TROAP	2.5139	0.0131721	0.0439839
ZNF586	2.51188	0.00228963	0.0159422
CLDN12	2.51125	0.0920661	0.168743
PPP1R11	2.50967	0.00441377	0.0228216
ESPL1	2.50888	0.0142095	0.0462277
LDLR	2.50842	0.0012879	0.011858
C20orf24	2.5082	0.185476	0.286274
FAM213A	2.50672	0.000878704	0.0100346
GRIPAP1	2.50571	0.0468391	0.10358
MEA1	2.50321	0.0010928	0.0109891
USP18	2.50118	0.00125042	0.0116932
LIG3	2.50034	0.00174604	0.0137456
ADORA2B	2.49907	0.0344799	0.0838755
DIAPH3	2.49677	0.0422305	0.0967177
FOXL2NB	2.49671	0.00119634	0.0114823
SEC23B	2.49609	0.000528731	0.00775515
ARSE	2.49544	0.00256049	0.0168685
SRPK1	2.49471	0.00737109	0.0309591
SPATA18	2.49386	0.00105985	0.0108464
USP37	2.4937	0.0021111	0.0152174
JRKL	2.49303	0.0370264	0.0881263
PGBD2	2.49082	0.00204926	0.0149722
RAB20	2.4896	0.123787	0.210527
MAZ	2.48769	0.00445368	0.0229309
ABCF3	2.48673	0.00255328	0.0168445
CASP9	2.48473	0.00894425	0.0347585
UBE2T	2.48347	0.00239564	0.0163246
ACBD5	2.48333	0.0803392	0.152904
MDP1	2.48245	0.0669784	0.134023
SMIM3	2.48186	0.0453938	0.101412
CDK1	2.48114	0.00818753	0.0329063
ACSL1	2.4789	0.0744917	0.144742
CYB5R1	2.47824	0.103278	0.183355
TNFSF4	2.47761	0.00158281	0.0130756
ZNF350	2.47742	0.0279192	0.0729193
C6orf203	2.47734	0.110896	0.193658
UPF3A	2.47627	0.110359	0.192956
FASTKD5	2.47345	0.0714004	0.140343
DDX55	2.47293	0.0707186	0.139609
NIPSNAP1	2.47088	0.000437773	0.00716647
DPAGT1	2.47064	0.00230932	0.015968
FLAD1	2.47052	0.0142834	0.0463888
PEX3	2.46876	0.0733393	0.143026
CCDC24	2.46844	0.0100053	0.0372919
TBXAS1	2.46795	0.000622825	0.00845519
SLC27A5	2.46759	0.00508821	0.0247779
USP34	2.46748	0.00647303	0.0285824
MINPP1	2.46564	0.0321608	0.0801315
NFATC3	2.46487	0.000950843	0.0103966
REG3G	2.46377	0.00844308	0.0335363
ANKRD45	2.46274	0.0105528	0.0384366
LDLRAP1	2.46188	0.0452347	0.101207
POLR3A	2.46049	0.00647557	0.0285833
NUP107	2.4603	0.0622289	0.12693
PREB	2.45946	0.0837795	0.15731
GAA	2.45865	0.000853842	0.00991334
TSR1	2.4584	0.00372207	0.0207844
MGME1	2.45733	0.15914	0.254733
FAM53C	2.45538	0.000533322	0.00780374
MPP2	2.45238	0.00060064	0.00830829
GEMIN8	2.45158	0.0695849	0.138062
RNF20	2.45136	0.0088361	0.0344698
DNASE1L1	2.45044	0.000558962	0.00799449
SEC61A1	2.45003	0.0055028	0.0259488
TEN1	2.44984	0.0104978	0.0383862
COG1	2.44517	0.0312614	0.0786678
TMEM163	2.44462	0.00599366	0.0272841
METTL2B	2.44439	0.0862701	0.160801
GFPT2	2.44391	0.0416375	0.0957171
SND1	2.4437	0.000452038	0.00725828
PXN	2.44143	0.00395231	0.0215518
COPA	2.44139	0.000610821	0.0083666
UBE3B	2.43993	0.034563	0.0840178
UBXN11	2.4399	0.00309455	0.018662
R3HCC1	2.43945	0.0460695	0.102453
STN1	2.43889	0.0792367	0.151482
IL1RAP	2.43753	0.0678927	0.135519
ADK	2.4368	0.0425591	0.0972485
MSN	2.43612	0.000443041	0.00721543
CYB5D1	2.43597	0.00173403	0.013704
PCNA	2.43491	0.0555128	0.117055
HARBI1	2.43459	0.00470356	0.0237769
NR1H3	2.43406	0.0312308	0.0786678
MTERF3	2.43387	0.151831	0.246226
SEC22A	2.43194	0.0230171	0.0634959
PRR9	2.4312	0.000974017	0.0104578
TBRG1	2.4304	0.0816112	0.154593
DHCR24	2.42782	0.00141799	0.012375
THOC1	2.42551	0.0461641	0.102589
BFSP1	2.42546	0.00537421	0.0256292
TBCC	2.42474	0.0764979	0.147514
GPI	2.42339	0.000642409	0.00860631
HAUS8	2.42259	0.0369819	0.088087
INTS6L	2.42252	0.0330323	0.0815989
TMEM267	2.4206	0.0728935	0.142475
PLK4	2.42056	0.0118676	0.0413809
PI3	2.41999	0.425752	0.536518
TPSB2	2.41964	0.0148322	0.0477144
AK6	2.41864	0.00963287	0.0364605
VTI1A	2.418	0.00324121	0.0192894
IVNS1ABP	2.4179	0.000366098	0.00680819
SPICE1	2.41777	0.0165839	0.0509358
STUB1	2.41717	0.0225658	0.0626612
MED7	2.417	0.0110638	0.0396647
ZNF337	2.4166	0.00158799	0.0130918
ZNF14	2.4134	0.0157603	0.0495267
THNSL1	2.41199	0.081226	0.154102
IPO4	2.41157	0.000904299	0.0101738
SLC35C2	2.41133	0.0303451	0.0773055
CD177	2.41132	0.000368621	0.00682172
TCAF2	2.411	0.00228107	0.0159258
PORCN	2.41063	0.0157426	0.0494963
DALRD3	2.41042	0.0152739	0.0486996
TSPYL2	2.40967	0.0859489	0.160372
ST6GALNAC4	2.40793	0.0495994	0.107849
TACC3	2.40709	0.00354586	0.0203779
PRR4	2.40528	0.000397692	0.00698133
GINS4	2.40452	0.000360501	0.00675845
BEND5	2.40301	0.0281257	0.0732422
DUSP10	2.40165	0.00456563	0.0233499
CBWD5	2.40125	0.00162896	0.0132419
TPM3	2.3996	0.000520048	0.00770175
CCL20	2.39871	0.285392	0.396782
CDKN1A	2.39845	0.00113779	0.0111929
BBS4	2.39482	0.0527161	0.112645
WDYHV1	2.39458	0.0582446	0.121212
ABCB8	2.39342	0.000437079	0.00716647
ZNF394	2.39174	0.00698105	0.0299582
VDAC2	2.3913	0.0317475	0.0794695
UPRT	2.38999	0.0453233	0.101329
OSBPL1A	2.38738	0.0307017	0.0777922
FAM234A	2.38701	0.00253773	0.0167781
FIGNL1	2.38648	0.0675984	0.134976
PPEF1	2.38592	0.00037394	0.00682172
STX17	2.38489	0.0917543	0.168251
UGT8	2.3847	0.00146329	0.0125816
TGS1	2.3846	0.113458	0.197103
DEPDC7	2.38318	0.0336877	0.0826332
ENOX2	2.38023	0.0694794	0.13792
SESN2	2.3794	0.05823	0.121202
NIM1K	2.37935	0.00728861	0.0307289
ELOVL1	2.37874	0.000421103	0.0071064
EIF2B3	2.37837	0.000396468	0.00697886
GSTM4	2.3776	0.055316	0.116797
ERI2	2.37624	0.00503876	0.0246748
ECHS1	2.37601	0.00615381	0.0277546
KIAA1586	2.37581	0.00481734	0.0240729
CCNA2	2.37452	0.0629454	0.127865
UCP2	2.37447	0.122754	0.209266
C16orf62	2.3736	0.00370215	0.0207464
FAM175B	2.37211	0.0345892	0.0840182
HSPA8	2.37144	0.00246676	0.0165417
TTC1	2.37004	0.0805324	0.153167
PIGS	2.36917	0.00249836	0.0166349
SPIN2B	2.36913	0.0335713	0.0824637
CCT4	2.36779	0.000975496	0.0104578
TXLNG	2.36742	0.0395948	0.0922719
CNEP1R1	2.36458	0.0426583	0.0973609
NOP14	2.36383	0.0786316	0.150654
EIF2S1	2.36371	0.0159193	0.0498722
RNF138	2.36237	0.0864119	0.161016
CEP41	2.36174	0.0150303	0.0481516
DLX1	2.36161	0.00405536	0.0218564
SNRPA1	2.36111	0.00588116	0.0269527
TM9SF4	2.3556	0.000672748	0.00882882
INHA	2.3531	0.0155673	0.0491476
PGAP3	2.35264	0.0641669	0.129585
SMC1B	2.35246	0.00120856	0.0115181
SKIV2L	2.35231	0.00118948	0.0114614
ZNF530	2.35122	0.00222922	0.0157164
AMMECR1	2.3486	0.0261651	0.0694062
MTMR4	2.34844	0.0913176	0.167676
TAF1A	2.34818	0.0347923	0.084327
TUBE1	2.34601	0.0354289	0.0853956
SPDL1	2.34543	0.058529	0.121679
MAD1L1	2.34507	0.011778	0.0412077
SCFD1	2.34449	0.0197642	0.0573258
PPARD	2.34369	0.0172521	0.0523172
KIF1A	2.34299	0.000840413	0.00986276
MED21	2.34276	0.0687915	0.136888
ARF4	2.34242	0.00166368	0.0134068
ZBTB48	2.34057	0.0446176	0.100338
USP11	2.33989	0.000543628	0.00786972
CDRT4	2.33946	0.00573875	0.0266095
RNF19A	2.3357	0.0207373	0.0591905
SSSCA1	2.33567	0.00046262	0.00733076
TTF1	2.33542	0.0542017	0.115172
TBK1	2.33526	0.0246903	0.0664757
ARHGEF3	2.33405	0.000708588	0.00913241
PAPSS2	2.33377	0.0156735	0.0493554
DCAF11	2.33366	0.005157	0.0250231
EEF1AKMT1	2.33245	0.0525183	0.112433
CSRP2	2.33224	0.0562094	0.118143
BOC	2.33212	0.000818861	0.00978948
SHROOM2	2.33118	0.0184252	0.0547334
SUSD4	2.32888	0.00084993	0.00989938
ZNF816	2.32854	0.0134066	0.0445718
TXLNA	2.32806	0.0101129	0.0375333
PRPF6	2.32712	0.00290748	0.018095
ESCO2	2.32685	0.0273785	0.0718913
FNBP1L	2.32582	0.0269895	0.0711297
ZNF528	2.32221	0.00812357	0.0327752
ACTL8	2.3202	0.00165024	0.0133175
TRAPPC11	2.32005	0.0425273	0.0971939
TCTEX1D2	2.31972	0.00364049	0.0205645
FTH1	2.31937	0.0287043	0.0743027
CLUAP1	2.31924	0.00503324	0.0246675
RMI1	2.31772	0.0614755	0.126
CCDC157	2.31731	0.000996777	0.0105443
TMEM183A	2.31715	0.0944871	0.172043
PROKR1	2.31545	0.000675194	0.00884193
GAR1	2.31533	0.179134	0.278597
TMEM230	2.31307	0.00159803	0.0131303
ZFYVE27	2.31289	0.0601879	0.124102
CENPI	2.31221	0.00594218	0.0271408
RIOX2	2.31149	0.00262189	0.0171631
ARPP21	2.31142	0.0013685	0.0122314
MBTPS2	2.31058	0.0335862	0.082467
ZNF41	2.31044	0.00339764	0.019815
GNGT1	2.30681	0.03853	0.0906133
TFB2M	2.30584	0.0315974	0.0791715
RARG	2.30325	0.0445473	0.100291
WDR54	2.30282	0.000606007	0.00835687
TSNAX	2.30221	0.00931913	0.0356075
TRMU	2.30197	0.010341	0.0380674
BAX	2.3019	0.00229299	0.0159422
NR4A1	2.29997	0.00660475	0.0289547
MFSD11	2.29968	0.0845904	0.158408
SNAP47	2.29717	0.00601231	0.0273283
ZNF71	2.29685	0.00760366	0.0315669
PGM3	2.29562	0.00749084	0.0312793
KIF2A	2.29548	0.0824781	0.155704
PPCDC	2.29426	0.0166511	0.0510523
UPP1	2.2937	0.00167675	0.0134607
NOL6	2.28988	0.0159491	0.0499065
HBS1L	2.28927	0.0151791	0.048473
ECD	2.28719	0.0440873	0.0995857
DCP1B	2.28598	0.0656135	0.132048
SAMD15	2.28595	0.000664764	0.00876779
MRPS12	2.28505	0.000920004	0.0102374
DHDDS	2.28438	0.00111227	0.0110672
PNKP	2.28425	0.00089162	0.0100869
DCLRE1C	2.28362	0.0576511	0.120243
DDX59	2.28224	0.0148015	0.047641
HIST1H4I	2.28213	0.0471027	0.103909
KIAA1524	2.281	0.0104081	0.0381765
CUL7	2.27942	0.00102547	0.0107009
TRAFD1	2.2791	0.0283077	0.0736193
SNAI3	2.27787	0.00163462	0.0132546
ZNF675	2.27748	0.00209928	0.0151662
TRO	2.2767	0.00343631	0.0199688
ZNF267	2.2759	0.0515097	0.110898
MCEE	2.27557	0.117479	0.202333
LSM5	2.27557	0.0377676	0.0892889
SLC35A2	2.2746	0.000938958	0.0103446
BEX1	2.27307	0.0153686	0.0488486
NADSYN1	2.27257	0.00846819	0.0335923
DBN1	2.27193	0.00457913	0.0234091
ZNF701	2.27034	0.0121137	0.0418725
COG2	2.26999	0.0207395	0.0591905
KPTN	2.2685	0.0994254	0.178539
ALG14	2.26814	0.03994	0.0929145
POPDC2	2.26809	0.00123289	0.0116515
SARDH	2.26674	0.00282233	0.0177932
GPR18	2.2663	0.00262757	0.0171769
RNF157	2.26623	0.0470783	0.103909
FNDC3B	2.26495	0.00324693	0.0192966
RANGAP1	2.26268	0.0220093	0.0616624
POLR3H	2.2626	0.0482949	0.105644
DDIT4	2.26251	0.00428974	0.0225041
FAM104A	2.2624	0.000824751	0.0098006
RRP9	2.26217	0.179842	0.279342
RBM4B	2.26124	0.0798989	0.152294
CDCA2	2.26025	0.0314786	0.0789808
POLR2J2	2.2597	0.00156228	0.0129938
TTC25	2.25826	0.0102796	0.0379362
TP53BP1	2.25742	0.0107946	0.0390318
MCTS1	2.25636	0.0141387	0.046078
MLX	2.25579	0.00119331	0.0114693
PCYT1B	2.25499	0.00326642	0.0193734
GYS1	2.25451	0.00137916	0.0122483
TTYH2	2.25442	0.00511428	0.0248949
DCPS	2.25217	0.0041432	0.0221306
PIGA	2.25199	0.0794295	0.151731
MYL6B	2.25189	0.00135694	0.0121898
ATP5F1	2.25128	0.0167794	0.0513069
GJB1	2.25119	0.0006182	0.00842113
HDHD3	2.25116	0.00773517	0.0318911
CTR9	2.25045	0.0581702	0.121139
HMBOX1	2.24869	0.0692695	0.137587
POLR1E	2.24786	0.0174194	0.0526677
HS1BP3	2.24774	0.0051378	0.0249597
MGAT2	2.24551	0.0970041	0.175092
RHBDD1	2.24504	0.0164354	0.0506818
MFSD13A	2.24498	0.00107957	0.010919
TRMT1	2.24462	0.0227673	0.0629773
STT3A	2.2446	0.0017354	0.0137059
ARHGAP6	2.24442	0.00092136	0.0102431
OSTC	2.24314	0.00221288	0.0156531
OS9	2.24224	0.00990113	0.0370512
ACTR6	2.24137	0.00851822	0.033747
ORC1	2.23972	0.0233493	0.0641271
SH2D1B	2.23971	0.00414609	0.0221306
POM121	2.23749	0.00109008	0.0109828
SGF29	2.23594	0.00544086	0.0257943
ZNF69	2.23537	0.0091132	0.0351801
C1orf74	2.23474	0.00731104	0.0307915
ZNF888	2.23114	0.0104058	0.0381765
ENO1	2.22828	0.00103235	0.0107209
ZNF200	2.22673	0.0731144	0.142747
PLAUR	2.22635	0.0401818	0.0932747
CA14	2.22574	0.00428253	0.0224843
MMP16	2.22526	0.000639834	0.00858896
AKR1A1	2.22455	0.000628969	0.00849144
ANP32E	2.22377	0.0374115	0.0886873
SPRTN	2.22205	0.0396315	0.0923376
FAM103A1	2.22155	0.133254	0.222539
PDCD2L	2.22063	0.0607931	0.125024
PAIP2	2.22028	0.000881994	0.0100618
PRKCZ	2.21761	0.000645051	0.0086228
YIF1A	2.21623	0.00273578	0.0175096
NFYB	2.21577	0.0608524	0.125104
DNAL4	2.21424	0.0896946	0.165492
ZNF45	2.21415	0.0588555	0.122147
TRIM68	2.21392	0.0102805	0.0379362
SLC24A1	2.21372	0.00446841	0.0229874
MAGEF1	2.21224	0.207354	0.311196
TMEM11	2.21223	0.000618248	0.00842113
AATF	2.21105	0.000915866	0.0102247
NUP85	2.20978	0.111014	0.193795
PDIA4	2.20961	0.00127675	0.0117909
RAB7B	2.2096	0.0215619	0.0608133
XAB2	2.20901	0.00106342	0.0108545
CMSS1	2.20877	0.120169	0.20572
HNRNPK	2.20812	0.000912126	0.0102033
IFNAR1	2.20638	0.0237641	0.0648826
MUTYH	2.20597	0.0602984	0.124216
SLC25A22	2.20564	0.0351338	0.0849525
AGBL5	2.20468	0.00808059	0.03267
C6orf226	2.20458	0.250933	0.359721
PALB2	2.20018	0.0603733	0.124349
PRRC2B	2.19917	0.00145631	0.0125816
RNGTT	2.19915	0.0794727	0.151742
ALDH4A1	2.19702	0.0207538	0.0591991
CCZ1	2.1963	0.00428413	0.0224843
ACD	2.19416	0.000580118	0.00817518
ZFP1	2.19408	0.0425887	0.0972708
ZNF718	2.1917	0.000780587	0.00953721
KIF18A	2.19148	0.00111924	0.0111036
IFT22	2.19107	0.0106314	0.0386362
GPR146	2.19023	0.00102585	0.0107009
CLCN6	2.19018	0.0612232	0.125613
ASCC2	2.19	0.000919253	0.0102374
GGA1	2.18993	0.0155201	0.0490837
SLC26A4	2.18924	0.00560476	0.0262113
RINT1	2.18874	0.00586097	0.0269006
FBXO5	2.1864	0.125611	0.212908
TMEM141	2.18493	0.00110957	0.0110667
COPE	2.18414	0.00142923	0.0124259
TPD52L1	2.18353	0.00167681	0.0134607
NFRKB	2.18295	0.024381	0.0659528
COX11	2.18109	0.0241596	0.0656106
FAM118B	2.18053	0.131552	0.220329
MPDU1	2.18048	0.000731521	0.00926623
IMMT	2.17987	0.00641675	0.0284883
HDAC8	2.17901	0.0616869	0.126267
MDH2	2.17782	0.00126742	0.0117225
HSDL1	2.17778	0.011791	0.0412077
RGS2	2.17689	0.208917	0.312851
ZNF714	2.17643	0.0346761	0.0841789
DEPDC1B	2.17569	0.0394164	0.0920562
NEMF	2.1752	0.0565993	0.118784
ZSCAN20	2.17451	0.0053488	0.0255514
HSP90B1	2.17298	0.00107386	0.0108973
NELFCD	2.17186	0.00384587	0.0212595
TAC1	2.17058	0.00621523	0.0278978
ANAPC10	2.17048	0.124261	0.211245
NRN1	2.16818	0.00761374	0.0315908
ESYT1	2.16775	0.000960129	0.0104089
EIF4E	2.16714	0.0319592	0.0798625
RPF2	2.16695	0.0112298	0.0399657
RTCB	2.16543	0.00114471	0.0112127
PLPP1	2.16529	0.0151865	0.0484842
BCL10	2.16497	0.0657235	0.132123
P2RX6	2.16459	0.0269722	0.0711149
AP5Z1	2.16365	0.0288816	0.0745406
MAGED2	2.163	0.00105936	0.0108464
USP28	2.16271	0.0467515	0.10348
KDELC1	2.16248	0.0836454	0.157131
NEK4	2.16227	0.0034031	0.0198153
ATP6V0D1	2.16065	0.00160084	0.0131353
DNMT1	2.16061	0.0328701	0.0813721
HIST1H2AH	2.16	0.00804933	0.0326083
STK26	2.15861	0.0633412	0.128363
LYSMD3	2.15812	0.0695345	0.137985
DERL3	2.15688	0.0007528	0.00934375
NVL	2.15538	0.00163486	0.0132546
OMA1	2.15507	0.030455	0.077424
CAAP1	2.15478	0.0860457	0.16048
POR	2.15381	0.0156547	0.0493217
ACOX3	2.15261	0.0262508	0.0695733
FANCC	2.15202	0.00937539	0.0357629
GNPTG	2.15144	0.0980527	0.176593
TEF	2.15036	0.00118551	0.0114444
UTP11	2.15022	0.00738716	0.0310052
WDR46	2.15	0.00740902	0.0310455
TPI1	2.14847	0.00131617	0.0119918
ALDOA	2.14825	0.00244421	0.0164431
ZC3H14	2.14818	0.0183504	0.0546176
GYG1	2.14522	0.0213152	0.0602705
RPTOR	2.14479	0.00135292	0.012183
SDAD1	2.14309	0.0134769	0.0447693
ACO1	2.14288	0.0287783	0.0743683
HK2	2.14247	0.129414	0.217644
TSPAN13	2.14215	0.0632533	0.128228
MAB21L1	2.14128	0.000719306	0.00918337
SDHA	2.14064	0.00100829	0.0106201
XPC	2.14002	0.0943084	0.1718
ST7	2.13866	0.0307349	0.0778439
ZNF584	2.13655	0.0166609	0.0510696
CDC45	2.13604	0.0693288	0.137666
SRPRA	2.13493	0.000744873	0.00930558
ZNHIT1	2.13448	0.0123213	0.0422989
FDFT1	2.13365	0.000775989	0.0095191
EIF3I	2.13266	0.000794281	0.00963707
SUPT16H	2.13197	0.00300422	0.0184265
CNBP	2.13036	0.000656817	0.00873231
DKK3	2.12941	0.0888608	0.164301
ZNF143	2.12925	0.00237056	0.0162291
MVK	2.12859	0.0286331	0.0742121
B9D2	2.12826	0.108188	0.190001
PCLAF	2.12793	0.0692572	0.137587
UNKL	2.12758	0.011148	0.0398614
ODF2	2.12689	0.0128244	0.043308
UGDH	2.1268	0.00131143	0.0119754
HFE	2.12665	0.00499415	0.0245745
WRAP53	2.12513	0.000945345	0.0103772
OAT	2.12338	0.0215347	0.0607506
FAM92A	2.12211	0.0969616	0.175041
TARS2	2.1193	0.00101229	0.0106347
NOP2	2.11777	0.0437518	0.0990613
NOL3	2.11745	0.0457551	0.101981
MAN2B2	2.11725	0.100214	0.179507
ZNF212	2.11631	0.11833	0.203341
DHX29	2.11609	0.180023	0.279517
NSUN3	2.11582	0.0371315	0.0882964
IFT172	2.11523	0.0232373	0.0639012
SYN3	2.11224	0.0036272	0.0205645
TRMT10C	2.11088	0.0474115	0.104371
SLC17A5	2.10973	0.0277751	0.0726669
HDX	2.10882	0.0193653	0.0565342
WDR34	2.10816	0.00608059	0.0275464
KPNA6	2.10772	0.00268427	0.0173342
SLC31A1	2.10768	0.00117206	0.0113743
TRPV4	2.10685	0.00550255	0.0259488
APBA3	2.10386	0.144287	0.236499
POMK	2.10277	0.0109401	0.0393716
RFT1	2.1023	0.0280403	0.0731576
UTP4	2.10189	0.0029043	0.018095
ATP6V0D2	2.10157	0.00240196	0.0163494
C8orf58	2.10057	0.00753513	0.0313784
KCTD14	2.1004	0.000967893	0.010456
DBR1	2.1	0.172991	0.271392
MYH14	2.09999	0.00181324	0.013951
PRMT7	2.09904	0.0450656	0.10102
PSMB7	2.09806	0.00125086	0.0116932
ARPC1A	2.09738	0.000849748	0.00989938
ERCC5	2.0969	0.00231646	0.0159901
COQ5	2.09617	0.00363537	0.0205645
TRMT2B	2.09444	0.0738233	0.14381
ARL6	2.09277	0.00105487	0.0108464
C22orf29	2.09264	0.0337691	0.0827867
MRRF	2.09154	0.104748	0.185275
TBRG4	2.09124	0.000795101	0.00963744
ZNF761	2.09051	0.0211122	0.0598101
CENPU	2.09038	0.0932304	0.170497
CABYR	2.09009	0.00571175	0.0265147
UBB	2.0897	0.00986868	0.0369925
SIAE	2.08936	0.00174083	0.0137208
VARS	2.08837	0.00417227	0.0222169
BLOC1S5	2.0873	0.00728328	0.030717
ICOS	2.08714	0.00153294	0.0129086
PYGB	2.08655	0.000838792	0.0098542
TSSC4	2.0864	0.00272058	0.0174856
PPAN	2.08611	0.00983582	0.0369312
MPI	2.08574	0.00317323	0.0190051
PKM	2.08511	0.00092305	0.0102441
URB2	2.08441	0.075062	0.145365
LARS	2.08201	0.0125179	0.0426801
ATG4D	2.08138	0.00721836	0.0305992
NBAS	2.08095	0.00711789	0.0303548
HYLS1	2.0802	0.0635367	0.128589
INTS2	2.07989	0.0404449	0.0937243
CLN8	2.0788	0.072377	0.141852
ZSCAN32	2.07828	0.0149635	0.0480155
MRPL28	2.07803	0.00355109	0.0203796
C10orf107	2.07763	0.0179623	0.0538297
RAB23	2.07664	0.00861863	0.0339971
MYL12B	2.07479	0.00517289	0.0250604
IQCG	2.07424	0.0325927	0.0808891
WDR62	2.07348	0.0145173	0.046924
NAXD	2.07336	0.0437579	0.0990613
ZNF235	2.07291	0.000846405	0.00988659
MIPEP	2.07234	0.00567226	0.0264014
DHRS12	2.07059	0.0792236	0.151482
HAT1	2.07033	0.0287438	0.0743527
AMOT	2.06943	0.00175589	0.0137633
USP32	2.06922	0.00766206	0.0316909
NR1D1	2.06705	0.0561854	0.118113
HIST1H2BN	2.06702	0.0160719	0.0500562
C17orf75	2.06588	0.059453	0.122972
LRRC45	2.06562	0.0505482	0.109484
RAD9A	2.06539	0.0102229	0.0378153
POLD3	2.06459	0.0296305	0.0759661
CBLB	2.06386	0.0874784	0.162409
PITRM1	2.06344	0.00421944	0.0223173
IKBKAP	2.06245	0.0661871	0.132875
ALKBH4	2.06087	0.00841583	0.0334606
ZNF254	2.06019	0.0709057	0.13982
NCSTN	2.0598	0.00217345	0.0154571
ARG2	2.05972	0.0476007	0.104564
IGFBP5	2.0597	0.00135228	0.012183
RAI1	2.05961	0.00255188	0.0168443
UBE2V2	2.05939	0.0191418	0.0560783
PKLR	2.05717	0.0114083	0.0403492
FASTK	2.05502	0.00609545	0.0275933
VBP1	2.05474	0.00170697	0.0135527
PNP	2.05446	0.0710707	0.139875
METAP2	2.05248	0.10007	0.179328
PHF20	2.05062	0.0424202	0.0970399
NUDC	2.04879	0.00122335	0.0116047
NBPF3	2.04774	0.00176382	0.0137878
SEPT6	2.04703	0.0908456	0.167086
NOLC1	2.04611	0.0233086	0.0640686
ELOVL6	2.04608	0.0142949	0.0463939
ZNF35	2.04311	0.0172114	0.0522587
ZNF638	2.04305	0.0156326	0.0492775
AKR1E2	2.0421	0.00305484	0.0185612
GLMP	2.04139	0.00117426	0.0113833
SLC25A35	2.04127	0.0949949	0.172571
CDC25C	2.04102	0.0295656	0.0758413
FAM122A	2.03913	0.0615159	0.126035
SLC35B2	2.03824	0.00240781	0.0163566
MED24	2.03727	0.0202084	0.0582463
DEF8	2.03639	0.0136516	0.0451409
CDPF1	2.03513	0.0824974	0.155717
POC5	2.03412	0.143766	0.235935
LAD1	2.03364	0.0593962	0.122891
COA3	2.03213	0.00088721	0.0100837
PUDP	2.03022	0.0517954	0.111356
ALDH7A1	2.02985	0.0080102	0.0325145
CASP6	2.02911	0.0627587	0.127628
ZNF234	2.02534	0.0124199	0.0425015
ERMARD	2.02523	0.131342	0.220186
ZNF613	2.02498	0.0618405	0.126436
ZNF124	2.02315	0.00646196	0.0285748
TBL3	2.02312	0.00516985	0.0250556
FAM86C1	2.023	0.0475929	0.104564
ADRM1	2.02263	0.00123401	0.0116515
PAK1	2.02191	0.108129	0.189925
TAMM41	2.02175	0.047721	0.104772
EFNA3	2.02166	0.0997242	0.178839
PPIH	2.02009	0.203744	0.307099
ZNF274	2.02005	0.0850969	0.159124
TAF12	2.01957	0.195662	0.297989
C12orf43	2.01877	0.0380439	0.0898377
SARNP	2.01809	0.0503753	0.109187
POLH	2.01808	0.00164451	0.0132801
TIMM10B	2.01793	0.00110481	0.0110463
EMP3	2.01646	0.00330674	0.0195083
ETV4	2.01488	0.00234008	0.0160986
ZNF155	2.01398	0.00587922	0.0269527
RBM7	2.0137	0.0839306	0.157493
POLA2	2.01352	0.00303082	0.0184875
MAMSTR	2.0133	0.00224104	0.0157634
NBPF15	2.01166	0.00861471	0.0339969
TDP2	2.01072	0.153992	0.248676
ELAC1	2.01003	0.00130359	0.0119395
HIST1H1D	2.01001	0.0043387	0.0226056
SLC26A6	2.00818	0.0192973	0.0564053
ZNF883	2.00806	0.0275169	0.0721716
TCHP	2.00735	0.0657077	0.132123
RPP30	2.00376	0.0587565	0.122007
GAGE2A	2.00364	0.0122764	0.042216
COPB2	2.00316	0.00237618	0.0162463
UHRF1	2.00147	0.0710682	0.139875
FASTKD3	2.00135	0.138476	0.229379
LBX2	2.00068	0.00787796	0.0322564
ZNF384	2.00019	0.00405489	0.0218564
SUN2	1.9998	0.0113641	0.0402805
TNS2	1.99978	0.00115191	0.0112592
MAGIX	1.99934	0.00339957	0.0198153
TIGD1	1.99834	0.00433427	0.0225922
PDCD11	1.9981	0.0996095	0.178738
EPRS	1.99765	0.00872874	0.0341521
C2orf42	1.99759	0.0702876	0.139022
IKBKE	1.99665	0.00424514	0.0223896
SCNM1	1.9962	0.0415062	0.0955033
COG4	1.99534	0.00126607	0.0117225
MYO1E	1.99477	0.0807606	0.153537
ECH1	1.99395	0.00211485	0.0152193
CTC1	1.99259	0.0305487	0.0775925
TMEFF1	1.99241	0.030265	0.0771495
NSUN6	1.99209	0.0486257	0.106205
RBM41	1.99191	0.0342502	0.0835601
HIST1H3H	1.99082	0.0112392	0.0399657
PACRGL	1.98703	0.0995932	0.178735
STAM	1.98431	0.0567514	0.118955
NBPF9	1.98332	0.00385961	0.0212987
MOCS3	1.98313	0.0611615	0.125529
COL25A1	1.98291	0.00132132	0.0120297
GPR108	1.98284	0.00291423	0.0181109
PRSS35	1.98271	0.0336061	0.0824828
LAMB1	1.98148	0.00263349	0.0171863
ZNF181	1.98147	0.0220288	0.0616746
SLC25A17	1.98038	0.140495	0.231969
METTL2A	1.98025	0.00143596	0.0124695
HDLBP	1.98011	0.00396865	0.0215987
LRP8	1.98	0.00560781	0.0262113
ACAA2	1.97757	0.181804	0.281638
IKBIP	1.97689	0.0107419	0.038904
PDZD11	1.97688	0.013711	0.0452516
POLDIP3	1.97634	0.014289	0.0463939
FAM114A1	1.9739	0.00906303	0.0350197
POLD1	1.97389	0.0158077	0.0495991
ZNF569	1.97363	0.00974678	0.0367323
NPIPB5	1.97287	0.00195852	0.014581
BAD	1.97276	0.0385355	0.0906133
SHTN1	1.97254	0.13164	0.220447
DNASE2	1.97233	0.00124705	0.0116932
TRMT11	1.9719	0.0224626	0.0625308
KIAA0319L	1.9718	0.00227604	0.0158997
DUS4L	1.97103	0.0409164	0.094537
ZBTB49	1.97005	0.0800326	0.152444
ZNF266	1.96913	0.0512434	0.1105
CNOT3	1.96912	0.00355893	0.0203875
GZMM	1.96863	0.00438555	0.0227431
RNF175	1.96856	0.0059581	0.0271728
CPVL	1.96836	0.00311663	0.0187766
WDR92	1.96785	0.0478954	0.105041
TSN	1.96774	0.0135634	0.0449697
SLC50A1	1.96741	0.00262369	0.0171631
ZNF177	1.96501	0.00272274	0.0174862
RLBP1	1.96467	0.113669	0.197413
ST6GAL1	1.9606	0.00151536	0.0128574
PTK2	1.96019	0.0485464	0.10605
CENPF	1.95977	0.0552795	0.116797
HEATR6	1.95879	0.0574287	0.119942
OBP2A	1.95757	0.00332112	0.0195566
TXNDC9	1.95707	0.00273473	0.0175096
TOM1	1.95619	0.00290292	0.018095
ZNF808	1.95452	0.00903133	0.0349577
TMEM67	1.95334	0.0838044	0.157333
HERPUD1	1.95241	0.0588741	0.122147
KIF18B	1.95231	0.0666345	0.1334
FBXO42	1.95181	0.00490466	0.0242907
ZNF347	1.95077	0.0175685	0.0529743
CKAP2L	1.95028	0.060839	0.125098
MFAP3	1.94888	0.0306474	0.077735
GNG12	1.94739	0.0033298	0.0195876
ZWILCH	1.94644	0.0328334	0.0813225
HAUS1	1.94587	0.147419	0.240476
LARS2	1.94565	0.0150482	0.0481684
TMEM102	1.94531	0.00638446	0.0283862
MTBP	1.94477	0.0322073	0.0801933
MMAB	1.94341	0.00382249	0.0212095
GTPBP4	1.94203	0.00111963	0.0111036
FAHD1	1.94085	0.0398788	0.0928252
ZWINT	1.94015	0.00695482	0.0298889
PGD	1.9401	0.00180012	0.0139104
ACTA2	1.93903	0.0944982	0.172043
FAM49B	1.93892	0.154622	0.249396
RNF216	1.9388	0.00495509	0.0244681
ARFIP2	1.9383	0.00107904	0.010919
KCTD6	1.93773	0.00929878	0.0355776
RGS14	1.93638	0.167836	0.26511
STAP2	1.93601	0.0732224	0.142844
SCRN1	1.93543	0.0443881	0.100043
KDM8	1.9341	0.0158375	0.0496669
AC004381.6	1.93319	0.00854388	0.0338046
G6PC3	1.93256	0.00139954	0.0122978
SERPINA5	1.93224	0.00712888	0.0303709
SLC10A3	1.9312	0.143588	0.235737
LRRC34	1.9307	0.062196	0.126907
WRB	1.92985	0.00146241	0.0125816
KIFAP3	1.92896	0.00578403	0.026708
FBXO34	1.92862	0.0929054	0.169979
LRRC40	1.92767	0.150387	0.244306
ZNF765	1.92749	0.0140781	0.0459479
AIFM1	1.92733	0.00952464	0.036187
ACLY	1.9269	0.00210407	0.0151769
GSS	1.92613	0.00152521	0.0128695
PNLIPRP3	1.92582	0.00364416	0.0205655
BCOR	1.92508	0.0460612	0.102453
COG3	1.92505	0.0871513	0.162047
ZNF668	1.92466	0.00851121	0.0337301
SAP30BP	1.92351	0.03473	0.0842763
SMN2	1.92258	0.0108714	0.0392138
WDR81	1.92136	0.00789823	0.0322597
MRPS2	1.92135	0.069526	0.137985
MYL5	1.92126	0.00317268	0.0190051
MTFR2	1.92061	0.152773	0.247295
ENO2	1.92039	0.00819431	0.0329227
CCNB1	1.91686	0.0141213	0.0460337
ZNF205	1.91667	0.0359941	0.086332
FKBP4	1.91648	0.0953963	0.173136
SMN1	1.91494	0.00712914	0.0303709
CUL1	1.91357	0.00129999	0.0119334
SLC47A1	1.91259	0.0488423	0.106506
ZFYVE19	1.91207	0.127971	0.215665
YIF1B	1.90878	0.00303251	0.0184886
DGCR14	1.90862	0.108557	0.190568
GTPBP10	1.908	0.0124192	0.0425015
ZNF257	1.90792	0.0107021	0.0388043
EARS2	1.90709	0.033092	0.0816718
PSMB3	1.90681	0.00646903	0.0285824
FAM174A	1.90593	0.260376	0.370001
DTL	1.90575	0.00575156	0.0266487
NFX1	1.90525	0.0867634	0.161496
B3GNT9	1.905	0.00379105	0.0210829
RAB43	1.9045	0.00334136	0.0196273
LOXL4	1.90436	0.00502106	0.024656
DAXX	1.90373	0.0128764	0.0433351
FOCAD	1.90247	0.00453269	0.0232398
C2orf49	1.90196	0.0718846	0.141067
HOXA6	1.90122	0.00709898	0.030327
THOC2	1.90083	0.0248647	0.0668237
DCAF8	1.90054	0.0361956	0.0866793
PAAF1	1.89975	0.0287169	0.0743196
ITCH	1.89964	0.044238	0.0997969
ZNF93	1.8966	0.0651831	0.131365
ZNF85	1.89641	0.0794657	0.151742
C19orf73	1.89623	0.00346412	0.0200876
MASTL	1.89581	0.00828319	0.033084
DRAP1	1.89547	0.0418335	0.0960215
FAHD2A	1.89346	0.00409573	0.0219867
ETV1	1.89336	0.0102671	0.0379213
SF3B4	1.8933	0.0022089	0.0156503
FAM71E1	1.89303	0.0510028	0.110117
ZNF700	1.89301	0.0592678	0.122755
MPHOSPH9	1.89179	0.0927386	0.169724
C8orf48	1.89091	0.0594039	0.122891
CHRNB1	1.89076	0.00210027	0.0151662
ELOA	1.89057	0.00224014	0.0157634
DCTD	1.88992	0.0016416	0.0132801
TMEM182	1.88976	0.0020587	0.0149722
DGKG	1.88945	0.00483542	0.0240814
PGM1	1.88908	0.00238164	0.0162655
TAF8	1.88902	0.0615218	0.126035
CENPS	1.8887	0.11027	0.192938
ZNF221	1.88851	0.00384956	0.0212595
PIDD1	1.88829	0.0961409	0.173971
ZNF436	1.88789	0.0957391	0.17353
C11orf80	1.88542	0.0660694	0.132682
FAM212B	1.88541	0.0235985	0.0645458
TOX4	1.88471	0.00554705	0.0260769
SV2A	1.88353	0.0430481	0.0979628
MOG	1.88315	0.0039864	0.0216663
HM13	1.88281	0.00270344	0.0174212
ITFG1	1.88223	0.137851	0.22853
PANK4	1.88205	0.00157914	0.013054
SLC12A7	1.88116	0.0722969	0.14174
GMPPA	1.88101	0.00148835	0.0126988
SMG6	1.88077	0.0123189	0.0422989
IPO9	1.87663	0.00526201	0.0253147
NMRAL1	1.87508	0.00173864	0.0137208
FMOD	1.87485	0.00262406	0.0171631
UBAC2	1.8748	0.00177513	0.0137886
COPG2	1.87445	0.0117033	0.0410366
SDC4	1.87409	0.0613756	0.125883
SWI5	1.87382	0.0128452	0.0433305
VTA1	1.87342	0.00199857	0.0147723
ALDH3A2	1.87285	0.243143	0.350942
SUPT20H	1.87276	0.0025323	0.0167513
CCDC167	1.87232	0.00168291	0.0134633
IPO11	1.87117	0.0193928	0.0565762
ZUFSP	1.86964	0.0758285	0.146432
RARB	1.86958	0.0225056	0.0625806
PLCD1	1.86844	0.0598379	0.123578
PSCA	1.86712	0.00279327	0.0176704
ZW10	1.86636	0.0125414	0.0427184
INIP	1.86561	0.00707238	0.0302557
ZNF615	1.86514	0.0446688	0.100398
THYN1	1.86441	0.0365304	0.0872929
R3HDM1	1.86422	0.12056	0.206245
INTS9	1.86345	0.00440385	0.0228002
PDLIM2	1.86324	0.0334549	0.0822439
AIFM2	1.86284	0.0231578	0.0637256
MINDY4	1.86241	0.0119674	0.0415411
PTS	1.86137	0.124342	0.211316
BUD13	1.86133	0.105677	0.186773
CCT6A	1.8596	0.0081254	0.0327752
HMCES	1.85926	0.00246965	0.0165429
B4GALT6	1.85905	0.00723352	0.0306229
FGF11	1.85853	0.00362912	0.0205645
MRPS22	1.85692	0.00144857	0.0125416
CD58	1.85539	0.00410579	0.022031
CCDC126	1.85368	0.167538	0.264672
FLRT3	1.8533	0.00153661	0.0129211
LCN10	1.85262	0.00345446	0.0200506
VCPKMT	1.85229	0.159969	0.25569
DCAF13	1.85018	0.00142181	0.0123818
LMAN2	1.84979	0.0014602	0.0125816
EXTL3	1.84955	0.00700224	0.0300293
METTL22	1.84932	0.0064244	0.0285101
MAP1LC3B2	1.84772	0.00204788	0.0149722
RCN3	1.84751	0.177435	0.27673
ZNF136	1.84606	0.0978655	0.176334
N6AMT1	1.8451	0.0550073	0.116438
POLQ	1.84505	0.00274512	0.0175326
LHX6	1.84414	0.00230393	0.0159626
TMCO4	1.84344	0.0424603	0.0971134
CRKL	1.84181	0.196874	0.299329
SUN1	1.84166	0.0312615	0.0786678
DHX8	1.83998	0.010557	0.0384366
NQO1	1.83997	0.00168558	0.0134633
EMC2	1.83933	0.0375506	0.0889305
SGO2	1.8384	0.0330258	0.0815989
PLD2	1.83814	0.153992	0.248676
WASHC2C	1.83688	0.058899	0.122152
TXN2	1.83374	0.0101875	0.0377297
FAM134C	1.83312	0.00242763	0.0164326
PSMB1	1.83302	0.00337357	0.0197217
DEGS1	1.83289	0.00483678	0.0240814
STRADA	1.83265	0.0375585	0.0889322
NPM2	1.83249	0.0732216	0.142844
RNPS1	1.83225	0.00631121	0.0281939
SNRPB2	1.83209	0.00386123	0.0212987
SH3BGR	1.83179	0.166074	0.262972
SLC16A1	1.83114	0.00200516	0.0147763
HSD17B10	1.83029	0.00339057	0.0197832
LEO1	1.8296	0.050305	0.109092
ZMYM5	1.82888	0.188961	0.290296
SUPT6H	1.82884	0.0346319	0.0840883
CIART	1.82803	0.0243099	0.0658577
WRAP73	1.82733	0.0219862	0.0616454
MYH10	1.82654	0.0024152	0.0163862
TMEM223	1.82648	0.0171802	0.0522027
ZNF577	1.82611	0.0105162	0.0384078
MUT	1.82475	0.133231	0.222531
STIL	1.82359	0.00778087	0.032009
PLCB4	1.82357	0.011111	0.0397758
EPB41	1.82328	0.00297742	0.0183427
SAE1	1.8226	0.00156718	0.0130168
ZNF440	1.82201	0.0751431	0.145476
MICA	1.82179	0.0452553	0.101232
ZNF66	1.82176	0.00519678	0.0251164
NIPSNAP3A	1.82166	0.200407	0.303267
TJAP1	1.82129	0.0798278	0.152206
C11orf58	1.82116	0.0117895	0.0412077
CDKAL1	1.8211	0.0118944	0.0414389
CD82	1.81943	0.00252566	0.0167164
UXS1	1.81895	0.0143824	0.0465988
CIAO1	1.81776	0.0150311	0.0481516
RFX5	1.81753	0.0156857	0.049381
MEN1	1.8174	0.223335	0.328879
ARMC2	1.81664	0.00158766	0.0130918
OLFML3	1.81605	0.00946201	0.036037
ZNF438	1.81588	0.088578	0.163958
SMS	1.81565	0.00189596	0.0142904
POLR2E	1.81292	0.00299318	0.0183864
ATXN2L	1.8116	0.00427145	0.0224467
COMMD2	1.81118	0.0126236	0.0428989
TAF1C	1.81085	0.0875075	0.162438
ZNF449	1.81084	0.0790407	0.151177
PHKB	1.80924	0.00882643	0.0344599
ZNF677	1.80868	0.0014812	0.0126769
GCDH	1.80768	0.0123045	0.0422888
PAQR4	1.80756	0.0100728	0.0374415
GORAB	1.80654	0.0539381	0.114673
WWP2	1.80651	0.00316376	0.0189764
ABI1	1.80524	0.172441	0.270633
UBA3	1.80472	0.0103184	0.0380189
PUF60	1.80368	0.00153407	0.0129086
P4HA1	1.80352	0.0210328	0.0596932
ZNF480	1.80276	0.00814655	0.0328143
C3	1.80269	0.137244	0.227894
PDHB	1.80172	0.00307186	0.0186263
KIAA0391	1.80146	0.0154733	0.0490027
RNF8	1.80099	0.183326	0.283456
ZNF268	1.80069	0.030683	0.0777844
SLC17A7	1.80023	0.0053325	0.02551
DNAJC4	1.79945	0.0114793	0.0405007
CMPK1	1.79936	0.187579	0.288573
UGT2B7	1.7991	0.0474239	0.104371
HINT3	1.79819	0.264983	0.374761
RP11-195F19.5	1.7981	0.0183063	0.0545263
SIX5	1.79797	0.00250523	0.0166393
RAD51AP1	1.79776	0.17057	0.26863
ATP6V0E2	1.79755	0.0218296	0.0613983
HIST1H1B	1.79674	0.0210605	0.0597194
SAMM50	1.79488	0.00394986	0.0215518
KIF4A	1.79351	0.00973151	0.0366861
TRPC4AP	1.79304	0.0239604	0.0652873
C19orf25	1.79061	0.0362365	0.0867083
GTF3C1	1.78979	0.0164787	0.0507274
NXT1	1.7896	0.204388	0.30769
HIST1H2BC	1.78949	0.0144973	0.0468839
DDX31	1.78874	0.166172	0.263093
ITIH6	1.78865	0.00422382	0.022321
CPT1C	1.78776	0.0246728	0.0664541
MRPL58	1.78719	0.171185	0.269282
C15orf57	1.78587	0.0153229	0.0487792
OCIAD2	1.7848	0.00233622	0.0160811
PFKP	1.78268	0.00858436	0.0338991
E2F8	1.78262	0.00581643	0.0267665
FAM19A3	1.78217	0.00191009	0.0143439
C19orf44	1.78131	0.0213707	0.0603715
FAM24B	1.78043	0.0236998	0.0647506
LYRM9	1.78033	0.225473	0.331388
PSEN2	1.78033	0.018404	0.0547104
ARMCX5	1.77988	0.015632	0.0492775
TRIM5	1.77886	0.0916646	0.168111
XRCC2	1.7788	0.0715979	0.140686
ANKRD42	1.77783	0.123782	0.210527
IDE	1.7774	0.00631109	0.0281939
ENOX1	1.77733	0.0135704	0.0449697
ZNF248	1.77576	0.0604733	0.124534
NMT2	1.7743	0.0544739	0.115589
PAGE1	1.77405	0.00606456	0.027484
GCC1	1.77398	0.00756326	0.0314634
EAF2	1.77362	0.0191344	0.0560783
CLCN4	1.77324	0.00750938	0.0313403
BBS12	1.77319	0.052485	0.112403
STX18	1.77128	0.116151	0.200612
ZSCAN25	1.76996	0.0592576	0.122755
RARS2	1.76993	0.00797549	0.032432
MITD1	1.76941	0.198173	0.300779
RNASEH2A	1.76936	0.00447394	0.0230062
BLOC1S2	1.7692	0.00568629	0.0264365
C14orf1	1.76914	0.0110505	0.0396403
KIAA0753	1.76901	0.0772316	0.148601
ARRDC1	1.76738	0.0171935	0.0522173
UBC	1.76726	0.00809558	0.0326981
PRR11	1.76545	0.0372458	0.0884143
JMJD6	1.76453	0.0294657	0.0756646
BCKDHA	1.7635	0.00263329	0.0171863
C19orf48	1.76348	0.0154984	0.0490535
CRABP2	1.76295	0.256637	0.365966
CTSC	1.76294	0.01747	0.0527554
DHX32	1.76246	0.0631823	0.128105
ORAI2	1.76115	0.0037155	0.0207647
NME6	1.7607	0.0253201	0.0676974
MED19	1.76064	0.0713049	0.140191
CREB3	1.76049	0.00187617	0.014211
PFDN6	1.75937	0.00480745	0.0240729
PLOD2	1.75848	0.00261187	0.0171477
ERLIN1	1.75837	0.0229671	0.0634008
IGFBP6	1.75823	0.0523739	0.112205
WDR55	1.75788	0.00338447	0.0197665
TRUB2	1.75755	0.00648264	0.0285938
SPATA20	1.75735	0.254844	0.36396
NCAPD3	1.75701	0.00407745	0.0219367
PLCXD1	1.75657	0.0264005	0.0698638
PLCXD1	1.75657	0.0264005	0.0698638
ITGA5	1.75631	0.0154642	0.0489995
GATB	1.75553	0.139214	0.23041
PLTP	1.75489	0.0223561	0.0623055
SH2D2A	1.75463	0.0112261	0.0399657
HIF1AN	1.75361	0.00422562	0.022321
C12orf73	1.75357	0.150013	0.243887
BSG	1.75281	0.00395475	0.0215518
FBXO28	1.75266	0.188253	0.289558
PSMD1	1.75263	0.00295771	0.018242
ARMC6	1.75199	0.0107772	0.0390034
DDIT3	1.7513	0.0315363	0.0790804
DNAJC19	1.75024	0.0737548	0.143734
DHRS4L2	1.74969	0.0934061	0.170691
ZCCHC7	1.74943	0.0507265	0.109695
SOBP	1.74942	0.0388865	0.0913047
TTC17	1.7494	0.0333839	0.0821684
FANCI	1.74842	0.00388643	0.0213802
CLEC16A	1.74822	0.00723157	0.0306229
TRIP4	1.74815	0.12612	0.213396
PPME1	1.7465	0.0127175	0.0431019
CCDC191	1.74572	0.00756885	0.0314759
XKR9	1.74515	0.0120259	0.0416487
DVL2	1.74374	0.0893275	0.16487
NEK8	1.74147	0.0288634	0.0745359
PCOTH	1.74035	0.113965	0.197788
NXT2	1.73962	0.00778037	0.032009
CTNNBL1	1.73947	0.00498067	0.0245378
SEC14L2	1.73821	0.0158284	0.0496511
PIH1D1	1.7378	0.0057599	0.026658
NTHL1	1.7371	0.00415878	0.022179
ANAPC1	1.73685	0.0404854	0.0937726
ZFP69B	1.73607	0.00803063	0.032565
NDUFS2	1.73516	0.00449443	0.0230921
GPS1	1.73462	0.00300906	0.0184366
ZNF691	1.73438	0.0274485	0.0720287
C1QTNF6	1.73396	0.120163	0.20572
ZNF430	1.73226	0.0268927	0.070936
STPG1	1.73107	0.0488244	0.106486
SF3B3	1.73062	0.0024841	0.0165969
EXOSC10	1.7306	0.00266632	0.0172731
CAPZA2	1.73025	0.0109386	0.0393716
ZSCAN22	1.72947	0.0751761	0.145517
PDCL3	1.72879	0.0114069	0.0403492
ZNF439	1.7285	0.0650885	0.131208
EDEM2	1.72772	0.00335966	0.0196829
C5orf34	1.72711	0.0698934	0.138563
VAX2	1.72561	0.00475033	0.0239191
AP3M1	1.72441	0.00704263	0.0301752
GEMIN6	1.72397	0.092465	0.169339
DAGLB	1.72321	0.00541211	0.0257497
USE1	1.72284	0.00473356	0.023869
BMT2	1.72264	0.00765558	0.0316749
ZIK1	1.72244	0.0152336	0.0485965
MCM3AP	1.72227	0.0273177	0.0717627
SMIM8	1.72211	0.0129978	0.0435447
EDARADD	1.71857	0.0194724	0.0567525
DUSP18	1.71806	0.0193486	0.0565013
PIGO	1.71805	0.0086779	0.0340822
KIF24	1.71749	0.0193271	0.056472
RBM23	1.71724	0.00880648	0.0343982
TCOF1	1.71718	0.0206436	0.0590133
TFPI2	1.71681	0.204831	0.308166
ZNF721	1.71492	0.07422	0.144375
CHID1	1.71454	0.00582348	0.0267788
NDC1	1.71409	0.165147	0.261741
TMEM108	1.71372	0.00285478	0.017933
TIPARP	1.71301	0.165663	0.262448
SLC25A51	1.71285	0.0389421	0.0913585
DHODH	1.71269	0.02935	0.0755093
INTS12	1.71267	0.186741	0.287691
SOX5	1.71259	0.033312	0.0820742
ZNF184	1.7118	0.0163029	0.0504633
CXCL1	1.71132	0.0353915	0.0853611
GPR155	1.71076	0.0360513	0.0864523
PARP1	1.70958	0.0109566	0.0393844
VPS33B	1.70954	0.238728	0.346041
[truncated: 10,219 more rows]

## Sheet: PEM22.CTC.vs.PEM22.Met
Gene	Log2FoldChange	P value	FDR-adjust P value
MAGEA1	8.18615	4.18814e-08	3.72457e-07
MAGEA3	7.98544	1.59022e-06	9.61724e-06
MAGEA6	7.92531	1.54437e-06	9.39087e-06
SERPINB2	7.89794	1.5474e-18	1.08305e-16
F2RL2	7.68309	6.41886e-11	1.06312e-09
SAA2	7.66959	9.04323e-63	1.16366e-59
MAGEC1	7.65456	1.54578e-06	9.39598e-06
ICAM1	7.32346	2.83655e-17	1.64186e-15
SAA1	7.18895	1.42216e-20	1.48687e-18
FCRLA	7.10932	4.64155e-07	3.20975e-06
MAGEA10	7.10884	2.06265e-06	1.21493e-05
CYP1A1	7.10219	5.61239e-20	4.96741e-18
MMP8	7.04127	1.15025e-09	1.45548e-08
FN1	6.79118	8.84641e-10	1.16065e-08
THBS2	6.78306	4.41066e-06	2.39395e-05
MAGEA12	6.7236	4.36483e-05	0.000182583
IL1B	6.69477	8.72268e-24	1.32648e-21
AGMO	6.64916	6.41874e-09	6.82165e-08
TF	6.61267	2.38138e-05	0.000107345
LOXL3	6.42892	1.49538e-06	9.13282e-06
DCT	6.36684	0.00150356	0.00420172
ITIH5	6.14455	4.11386e-05	0.000173291
RGS5	6.09955	1.20518e-07	9.66455e-07
MAGEC2	6.03799	0.00211215	0.00568642
REG3G	5.95946	7.96983e-15	3.08469e-13
SPATS1	5.9505	6.31793e-10	8.54282e-09
UCN2	5.85517	0.000124955	0.000463983
FMOD	5.75357	1.31178e-05	6.3402e-05
RXRG	5.57673	0.000114552	0.000429648
COL19A1	5.49321	1.51463e-13	4.41648e-12
CLDN1	5.43122	6.57623e-05	0.000262374
SLAMF9	5.27755	2.09748e-05	9.58915e-05
FDCSP	5.21737	0.000348843	0.00116499
GAPDHS	5.20829	0.0005777	0.00181377
PI3	5.19697	1.02452e-09	1.31327e-08
CDCA7L	5.19026	2.4109e-06	1.39965e-05
CSAG1	5.15414	0.00251348	0.00662551
FABP7	5.02281	0.000372474	0.00123503
PLAT	4.96966	5.77244e-07	3.89832e-06
PMEL	4.96947	0.0297236	0.0563355
TSPAN7	4.96224	0.000141534	0.000518523
GAGE2A	4.92197	7.36345e-05	0.000289825
GBA	4.91286	3.27229e-12	7.34751e-11
SSX1	4.88338	5.94312e-05	0.0002395
GAGE12H	4.88257	9.57232e-92	8.00628e-88
LCP1	4.80911	1.01633e-10	1.59936e-09
SEMA3A	4.74948	1.72364e-05	8.03821e-05
SLC24A5	4.72168	1.02624e-05	5.11379e-05
STEAP1B	4.7111	9.43472e-08	7.72889e-07
KCNE4	4.69044	4.21e-09	4.65158e-08
NQO1	4.67009	6.25068e-06	3.27676e-05
LCN2	4.65057	7.56371e-07	4.97154e-06
IGF2BP3	4.59978	8.58786e-08	7.09771e-07
ALDOC	4.57395	5.75789e-06	3.04897e-05
SERPINA3	4.56264	0.0149703	0.0311665
MSN	4.55512	2.66351e-20	2.62089e-18
ACP5	4.53425	1.04861e-06	6.62432e-06
MX1	4.53401	1.03844e-05	5.16688e-05
EPHA3	4.45923	9.63194e-07	6.13802e-06
SPAG4	4.44128	2.26093e-09	2.65038e-08
LRGUK	4.43632	1.32437e-11	2.59112e-10
CYP51A1	4.42955	4.51502e-08	3.98771e-07
CT55	4.41648	1.01562e-10	1.59936e-09
MCAM	4.40868	5.98359e-06	3.15255e-05
KRT27	4.39606	1.19637e-17	7.33071e-16
TYR	4.39479	0.00658704	0.0153294
SPP1	4.33725	0.00246138	0.00650047
SUMF2	4.32547	2.36685e-17	1.38436e-15
SHC1	4.27069	4.4049e-14	1.44198e-12
PSAT1	4.2517	0.00204318	0.00551887
IL1RAP	4.24268	1.02667e-06	6.49551e-06
SEC24C	4.14532	1.38818e-19	1.14958e-17
ANGPTL2	4.12219	1.73325e-05	8.074e-05
AIMP2	4.10963	5.59643e-20	4.96741e-18
BECN1	4.09854	4.38723e-23	6.32669e-21
MEGF10	4.0821	0.000123518	0.000459261
PNLIPRP3	4.06335	6.95943e-08	5.88789e-07
ITGB3	4.03663	0.00457169	0.0111302
STC2	3.98995	4.01648e-13	1.09248e-11
CCDC86	3.98826	3.12261e-20	2.9679e-18
PLA2G4A	3.96772	2.31591e-06	1.35079e-05
PRMT5	3.95242	3.96326e-22	5.13933e-20
HYOU1	3.94806	1.54302e-11	2.96686e-10
TNFRSF10B	3.93919	1.1136e-05	5.48537e-05
PCDHGC3	3.93733	3.15757e-05	0.000138199
SLC26A4	3.93662	3.69034e-08	3.32428e-07
ART3	3.92293	5.46885e-05	0.000222857
THNSL1	3.91716	6.91301e-16	3.28525e-14
COPA	3.90366	1.07892e-19	9.17826e-18
BIN3	3.90324	9.17496e-12	1.86657e-10
PDIA6	3.85646	4.19661e-17	2.37165e-15
LAD1	3.827	3.92858e-05	0.000166499
LPXN	3.82296	2.08261e-06	1.22496e-05
FADS2	3.81433	0.00011117	0.00041865
IGFBP3	3.80091	0.00128813	0.00366515
SLC26A2	3.79354	7.78501e-06	3.98006e-05
SNAI1	3.78557	2.57702e-05	0.000115325
BCHE	3.77462	0.000996471	0.00292541
PAEP	3.76754	0.0602402	0.102952
RP11-27I1.4	3.76599	2.11786e-20	2.10879e-18
COPG1	3.75861	8.01525e-16	3.76627e-14
TMEM45A	3.75765	2.50616e-07	1.85336e-06
LOXL4	3.74743	0.03836	0.0699385
BRF2	3.72457	2.75228e-21	3.11082e-19
SAA4	3.72289	8.13006e-56	9.06664e-53
LPL	3.71403	0.000856449	0.00255651
C1QTNF3	3.7105	0.0266035	0.0511521
DDOST	3.70998	4.36467e-20	3.94661e-18
ACO2	3.69778	1.25419e-11	2.46534e-10
KBTBD4	3.68538	1.07453e-23	1.61934e-21
ADAMTS4	3.66403	5.67905e-05	0.000230078
TYRP1	3.64815	0.151013	0.22243
M6PR	3.64563	4.41597e-13	1.19146e-11
FDPS	3.63615	2.02095e-16	1.03701e-14
PLIN2	3.63106	2.59905e-07	1.91359e-06
HSPA5	3.63046	1.47845e-14	5.39991e-13
LGALS12	3.62538	4.01621e-06	2.20273e-05
CCL20	3.6238	7.53297e-06	3.86775e-05
MARS	3.61657	7.23659e-20	6.37125e-18
MAT2A	3.58806	8.79138e-18	5.44675e-16
NUP188	3.58419	4.34833e-17	2.44912e-15
SPESP1	3.5816	0.00706967	0.0162962
SLC43A3	3.57576	7.81947e-08	6.53367e-07
WARS	3.56926	6.36891e-06	3.32815e-05
NCAPG	3.5544	3.06221e-10	4.3374e-09
ITGA4	3.5477	0.000164025	0.00059236
LUM	3.54149	0.000365915	0.00121618
CPN1	3.52126	0.00573687	0.0135968
POPDC3	3.52084	0.00031669	0.00106906
TUBA1B	3.51896	9.66594e-13	2.44247e-11
TBXAS1	3.51435	1.31296e-06	8.09254e-06
UGT8	3.49877	3.12627e-05	0.000137045
PYCR1	3.49214	1.45555e-09	1.79826e-08
HMGCS1	3.48075	2.17768e-09	2.56176e-08
CDK4	3.47794	1.22034e-12	2.99323e-11
C3	3.47227	0.00310415	0.00795803
AARS	3.46589	4.50181e-12	9.81828e-11
NCAPG2	3.4481	1.07546e-15	4.90201e-14
TFIP11	3.44038	5.35477e-17	2.98582e-15
NCSTN	3.44023	4.1131e-17	2.33234e-15
TBC1D4	3.43714	2.08252e-05	9.52593e-05
LDHA	3.4319	2.15893e-09	2.54149e-08
HSD17B12	3.42789	7.21658e-08	6.08462e-07
PPT1	3.42425	1.45797e-19	1.20143e-17
SPARC	3.42103	1.57786e-08	1.54353e-07
SLC18A1	3.41738	5.50218e-11	9.33473e-10
CPVL	3.40807	0.000956769	0.00282516
INTS9	3.40716	6.87655e-14	2.1421e-12
C8orf48	3.40357	5.18095e-08	4.52333e-07
ARHGEF3	3.40145	1.15694e-10	1.79696e-09
POMK	3.40021	3.65084e-11	6.38152e-10
ACTL6A	3.39778	1.64086e-26	3.19166e-24
EXO1	3.38287	1.79207e-09	2.16445e-08
MILR1	3.38217	3.2816e-08	2.99317e-07
PLA1A	3.38189	0.0326607	0.061106
KRT79	3.37277	6.05893e-12	1.28296e-10
QPCT	3.37138	0.016656	0.0342203
PMAIP1	3.36067	4.89376e-06	2.62717e-05
RECQL	3.35647	3.90513e-10	5.43469e-09
ANKRD45	3.35434	3.97934e-06	2.18392e-05
HFE	3.34059	1.51374e-05	7.17535e-05
BAAT	3.33857	0.00962323	0.0212147
EMC1	3.33705	9.50427e-16	4.40408e-14
CYP26A1	3.32612	2.04001e-07	1.53925e-06
GAPDH	3.32082	2.47953e-08	2.32889e-07
RNF26	3.31589	5.29959e-12	1.14389e-10
C1orf112	3.31528	1.30636e-17	7.94646e-16
DFNA5	3.31161	0.000680398	0.00209103
DNAJC14	3.30943	1.90772e-24	3.09829e-22
THTPA	3.30114	2.26282e-11	4.14762e-10
SPX	3.29818	2.06937e-16	1.05861e-14
CNOT1	3.29676	1.71158e-18	1.18311e-16
BCAS3	3.29453	1.74507e-05	8.12168e-05
TUBA1C	3.29329	1.08921e-09	1.38558e-08
SLC2A3	3.28151	0.000347117	0.00115992
ENPP2	3.27332	0.00459154	0.011172
PAGE5	3.26465	0.0623457	0.105872
FXYD3	3.26419	0.0296101	0.0561457
SOAT1	3.24642	3.63868e-08	3.28483e-07
ITIH6	3.23487	0.00613702	0.0143943
TFRC	3.22348	1.34533e-05	6.47988e-05
PFKFB4	3.21966	4.47022e-05	0.000186393
TMEM255A	3.21916	0.0060531	0.0142328
FCGR2A	3.21538	5.18913e-05	0.000212234
MYOC	3.2142	5.13916e-05	0.000210499
NNMT	3.20646	0.00351324	0.00886284
DHCR7	3.20475	0.00396269	0.00982043
C10orf90	3.2025	9.53835e-05	0.000365287
NOC2L	3.20014	2.28845e-13	6.46641e-12
VPS52	3.19031	1.43983e-15	6.39489e-14
CYB5D1	3.18975	2.24652e-14	7.84789e-13
SHCBP1	3.1873	6.63892e-10	8.95611e-09
EFTUD2	3.1851	2.5248e-18	1.68266e-16
ANKS1A	3.18267	1.95852e-05	9.01544e-05
CXCL1	3.18247	0.00354283	0.00893075
CDKN1A	3.17507	0.000314834	0.00106352
CSAG2	3.16937	8.41066e-07	5.45112e-06
PARP4	3.1635	1.55673e-09	1.90917e-08
NEFH	3.16289	0.0132102	0.0279615
CENPBD1	3.15555	9.47081e-13	2.40042e-11
GPNMB	3.15329	0.000272964	0.000936069
C1GALT1C1L	3.15112	1.8345e-05	8.48425e-05
LDLR	3.14211	0.00251748	0.00663188
CSAG3	3.14002	0.00112989	0.00326835
TPP1	3.13647	4.02392e-08	3.59381e-07
SLC5A6	3.12352	2.11056e-11	3.90546e-10
MAN1B1	3.11993	1.76035e-10	2.61287e-09
ESYT1	3.11947	2.85986e-12	6.49997e-11
AGA	3.11225	1.64493e-09	2.00557e-08
GNG2	3.10323	0.00022064	0.000773767
HBP1	3.09963	1.08728e-13	3.30691e-12
YARS	3.08729	3.11106e-14	1.04757e-12
RP11-398C13.8	3.08286	1.54012e-14	5.57644e-13
RPN1	3.08265	4.74919e-15	1.93767e-13
PNLIP	3.0806	3.95885e-44	2.87929e-41
P4HA2	3.07697	9.63499e-06	4.83281e-05
AKR1B1	3.06739	3.17743e-06	1.79325e-05
USP18	3.06452	1.64351e-05	7.72698e-05
HMGCR	3.06159	1.18135e-10	1.83147e-09
PLN	3.05268	0.00029049	0.000988671
PLOD2	3.05081	5.15894e-05	0.000211179
CD36	3.04444	7.36899e-05	0.000289975
KIRREL	3.04387	1.09984e-08	1.12184e-07
HEATR1	3.03307	2.96362e-12	6.70845e-11
PHB	3.03227	5.98631e-15	2.40719e-13
ABCF2	3.03165	3.16406e-18	2.07563e-16
BORA	3.02634	4.98163e-16	2.43663e-14
ACLY	3.02011	4.77914e-15	1.94515e-13
DOLK	3.0179	7.71373e-12	1.6039e-10
SND1	3.00878	2.43355e-10	3.51237e-09
MAGED1	2.99814	5.11446e-09	5.53752e-08
EDNRB	2.98277	0.000798242	0.00240355
LASP1	2.97503	8.3133e-13	2.14276e-11
CSGALNACT1	2.97283	0.00132831	0.00376354
RAB38	2.97151	0.00977354	0.0214951
TAF6	2.96968	4.5702e-13	1.22517e-11
STT3A	2.96744	5.40562e-14	1.72897e-12
GOT1	2.96394	2.83107e-12	6.44328e-11
SPTLC1	2.9597	2.49795e-19	2.00893e-17
DTL	2.95851	3.83112e-08	3.43078e-07
CDH2	2.95133	0.0115752	0.0249396
GJB1	2.94901	0.00847133	0.0190545
CALU	2.94816	5.90615e-09	6.32106e-08
DLX1	2.94643	0.00196358	0.00532622
NAGA	2.93864	2.45213e-08	2.30705e-07
EIF3L	2.93762	2.83766e-08	2.62401e-07
TDRKH	2.93729	5.52367e-08	4.79502e-07
PGM1	2.93643	1.48269e-05	7.05415e-05
PLSCR1	2.93593	7.86217e-06	4.01338e-05
KIFC1	2.93588	1.11495e-06	6.99322e-06
PBK	2.93552	1.8059e-07	1.38257e-06
ADAM9	2.92742	5.61804e-07	3.80942e-06
SLITRK2	2.91657	0.000771856	0.00233525
MBTPS1	2.90746	6.18614e-15	2.47564e-13
TM9SF4	2.90618	5.67401e-17	3.1325e-15
NRN1	2.90569	0.0126415	0.0269213
IARS	2.90322	4.97277e-14	1.61523e-12
SLC20A1	2.90038	0.000738848	0.00224595
SHISA2	2.89904	0.0268658	0.0515971
PIAS3	2.89207	1.9565e-11	3.66499e-10
EEF2KMT	2.89008	6.74284e-15	2.66653e-13
TBCCD1	2.89002	3.06245e-20	2.92735e-18
GLB1L	2.88002	0.000772812	0.0023373
PINX1	2.87921	1.32871e-07	1.05439e-06
TXLNA	2.87189	7.60484e-15	2.95846e-13
TRIM32	2.86424	5.30779e-10	7.23624e-09
CYB561A3	2.86125	5.51807e-05	0.000224535
UGT2B7	2.85992	0.00207264	0.00558851
PPME1	2.85773	5.77314e-12	1.2318e-10
ACAT2	2.85356	3.03595e-06	1.72329e-05
FBXO36	2.85004	1.5523e-12	3.69373e-11
PIGS	2.84912	2.30918e-12	5.35013e-11
LPCAT3	2.84796	1.25174e-08	1.2561e-07
NR0B1	2.84581	0.000593857	0.0018551
FAM109B	2.84553	0.000137663	0.000505693
TSR1	2.84424	9.8804e-14	3.02156e-12
MUL1	2.83228	2.00049e-14	7.05995e-13
GLDC	2.82974	0.000178229	0.00063801
SPAG5	2.82637	4.08021e-09	4.52311e-08
CFI	2.82093	0.019633	0.0393744
BATF2	2.81976	4.60704e-05	0.000191232
ENO1	2.81636	2.23001e-08	2.12073e-07
CTSK	2.80845	0.0319747	0.060006
RFT1	2.79931	1.80769e-17	1.08384e-15
PIGG	2.79388	5.59347e-17	3.09826e-15
CD200	2.79094	0.00313322	0.00802027
FRMD6	2.78605	1.0167e-05	5.06974e-05
ARMCX6	2.7855	5.88022e-11	9.87578e-10
LIF	2.78038	0.0159701	0.0329854
SF3B3	2.78037	1.45611e-14	5.32993e-13
ST6GALNAC2	2.77758	0.00476173	0.0115558
SKAP2	2.77606	9.21007e-06	4.63775e-05
HMGN4	2.77334	2.80382e-14	9.55241e-13
HOXA1	2.77326	4.32087e-07	3.01416e-06
ZNF619	2.77213	1.67398e-16	8.69639e-15
SLC35B4	2.77041	6.87711e-15	2.71321e-13
ARCN1	2.76923	1.10936e-13	3.36796e-12
APOBEC3B	2.75653	1.2949e-05	6.27492e-05
HOXD13	2.75648	0.018404	0.0373212
MTUS1	2.75421	6.61494e-06	3.44324e-05
MTX1	2.74721	6.17065e-10	8.35135e-09
P2RX6	2.74665	0.000246401	0.0008555
GM2A	2.74542	2.36466e-06	1.37491e-05
GLMP	2.74526	4.11051e-05	0.000173201
SF3B4	2.74433	1.29002e-09	1.62108e-08
ZFP82	2.74419	2.89438e-08	2.67167e-07
TANGO6	2.7406	7.24183e-13	1.89877e-11
OR8G5	2.73786	8.21414e-16	3.84891e-14
GAS2	2.73594	0.000219114	0.000769222
RNF40	2.72972	8.41039e-13	2.16445e-11
ANKFY1	2.72881	9.54537e-11	1.51494e-09
DNAJC11	2.72463	3.05314e-13	8.48388e-12
EIF4H	2.72408	1.5979e-21	1.89572e-19
GAS7	2.72236	0.000340096	0.00113828
DNASE2	2.71793	2.701e-07	1.98429e-06
TESK2	2.71669	0.000261996	0.000903085
RFXANK	2.71365	4.00159e-12	8.8077e-11
GLE1	2.712	1.28648e-16	6.76737e-15
LAMB1	2.71179	0.000392243	0.00129321
STARD4	2.71148	0.000401862	0.00132147
PC	2.70731	4.58839e-06	2.47995e-05
HOXA10	2.70719	0.00120733	0.00346537
RACGAP1	2.70584	6.73077e-11	1.10928e-09
TDRD9	2.70506	0.0140444	0.029459
PJA1	2.70422	3.15541e-10	4.46184e-09
RAB7B	2.70142	0.000637019	0.00197185
TTI2	2.69973	2.55118e-16	1.28931e-14
COPB2	2.69968	2.39373e-14	8.27319e-13
ATG13	2.69687	2.0064e-11	3.74589e-10
MRPS18A	2.69653	1.50417e-10	2.27092e-09
PLK1	2.69571	1.17493e-05	5.7519e-05
CXCL8	2.69499	0.00308093	0.00790458
ERP27	2.68761	5.15953e-05	0.000211179
C6orf223	2.68612	5.57056e-07	3.78183e-06
GANAB	2.68538	9.94906e-11	1.57249e-09
PTGS2	2.67496	0.000115568	0.00043278
UTP4	2.67354	3.1124e-14	1.04757e-12
BEX4	2.67093	0.00243485	0.00643448
TSPAN11	2.67012	0.0153205	0.0317888
LAMA4	2.66959	0.000753324	0.0022858
PHGDH	2.66907	0.0414837	0.0748263
SLC36A1	2.66647	1.71809e-10	2.55924e-09
SLC16A13	2.6644	7.51184e-06	3.85928e-05
EDEM2	2.66324	2.11842e-11	3.90747e-10
C17orf53	2.66152	3.2148e-08	2.94186e-07
FDFT1	2.6607	2.8461e-07	2.08448e-06
ZNF883	2.66007	2.84842e-06	1.63179e-05
IGF2BP2	2.6583	0.000410249	0.00134456
RIOX2	2.6576	2.14574e-18	1.45168e-16
PLTP	2.6564	0.000323721	0.0010898
ZNF473	2.65622	3.89125e-15	1.61121e-13
CTSV	2.65522	3.43855e-06	1.92182e-05
DARS2	2.65473	6.8894e-09	7.28482e-08
TUBB4B	2.6526	2.48229e-06	1.4378e-05
ZP3	2.64633	4.10139e-05	0.000172947
OS9	2.6449	3.42763e-08	3.11278e-07
EIF3C	2.64473	7.11125e-16	3.36037e-14
CTSA	2.64339	7.67798e-06	3.93497e-05
FAM53C	2.63287	4.9176e-12	1.06557e-10
YIPF2	2.62881	1.26533e-10	1.94724e-09
UGDH	2.62784	2.64579e-08	2.46704e-07
COL8A1	2.62702	0.00276107	0.0071842
IVNS1ABP	2.62602	5.32692e-08	4.63866e-07
EYA1	2.62519	0.0332844	0.062037
FEN1	2.62511	8.67755e-09	8.99926e-08
FZD6	2.62456	0.00236133	0.00626691
KIF2C	2.62409	9.14479e-07	5.86332e-06
SCAMP3	2.62398	3.45643e-09	3.88831e-08
MGP	2.6186	0.12013	0.183318
TCTN3	2.61383	5.10756e-14	1.64941e-12
RFX5	2.60997	7.7273e-13	2.00407e-11
KCTD11	2.60475	4.26406e-08	3.78004e-07
PES1	2.60119	5.33824e-09	5.75004e-08
GPR84	2.60081	2.12641e-10	3.10389e-09
PKM	2.59548	1.70188e-07	1.31315e-06
PLIN3	2.59477	1.62162e-09	1.98147e-08
DDIAS	2.58619	2.3955e-07	1.77781e-06
ELOVL1	2.57955	1.85399e-09	2.22758e-08
MANBA	2.57332	0.000130527	0.000481998
RAB5C	2.56694	2.32881e-11	4.25752e-10
PRAME	2.56641	0.00962023	0.0212109
ANGEL1	2.56534	1.67101e-11	3.19459e-10
RLBP1	2.56324	0.0415889	0.0749838
AP3M2	2.55936	1.48085e-07	1.16027e-06
CLP1	2.55795	3.67407e-17	2.09047e-15
ST7	2.55345	5.84788e-07	3.94131e-06
IFI16	2.5514	2.21157e-05	0.000100367
FLRT3	2.55083	0.00486932	0.0117861
CEP85	2.54908	8.57739e-10	1.13067e-08
PLOD1	2.54799	1.00574e-06	6.38129e-06
SCML4	2.54617	0.00501629	0.0120859
GNG11	2.54442	0.0068528	0.0158465
MRGPRX3	2.54245	0.0423418	0.0761771
PSME3	2.53984	2.07036e-15	8.94908e-14
ZNF410	2.53949	2.27496e-19	1.84736e-17
WDR3	2.53623	2.98702e-08	2.75148e-07
TK1	2.53091	0.000257033	0.00088744
C16orf62	2.52377	1.15913e-12	2.85987e-11
WBSCR22	2.52371	8.2503e-09	8.60418e-08
NAT10	2.52221	7.18964e-13	1.88804e-11
TMEM97	2.51739	4.32029e-06	2.35024e-05
ACOT8	2.51704	3.46995e-09	3.90089e-08
SHMT2	2.51561	2.53156e-07	1.86884e-06
FCHSD1	2.51368	2.23293e-09	2.62122e-08
COPG2	2.51254	5.22525e-12	1.1293e-10
CARS	2.51068	1.40258e-10	2.131e-09
TTC26	2.50828	3.67362e-08	3.31101e-07
USP11	2.50827	1.28537e-06	7.9371e-06
RNF185	2.50709	1.27213e-14	4.71843e-13
LMLN	2.50235	8.3218e-11	1.3353e-09
ARNT2	2.49676	0.000473716	0.00152332
TMEM229B	2.49331	0.000171232	0.000615069
CDC45	2.49139	1.37474e-05	6.59945e-05
CHID1	2.49104	2.34024e-09	2.73186e-08
NFATC2	2.49051	0.00869053	0.019456
TPM3	2.48986	2.14805e-12	5.03258e-11
USP10	2.4895	3.34129e-15	1.39733e-13
ZNF45	2.48852	3.73683e-11	6.52502e-10
PTCD1	2.48841	1.54363e-13	4.48296e-12
MPZ	2.4838	0.113605	0.175021
SOX5	2.48037	6.96153e-05	0.000275693
MCM5	2.47898	1.72342e-05	8.03821e-05
MBTPS2	2.47722	1.81252e-13	5.20066e-12
PRPF4	2.47489	8.23479e-13	2.1258e-11
TGDS	2.47426	4.25697e-05	0.000178607
NUDT17	2.47407	4.25114e-06	2.31639e-05
NAMPT	2.47312	1.59646e-06	9.648e-06
DNALI1	2.4688	0.00329852	0.00839842
C19orf57	2.46815	1.62152e-05	7.63864e-05
SLC16A1	2.46759	3.18531e-09	3.61491e-08
AKAP6	2.46722	0.0196033	0.0393242
INTS3	2.46561	4.27039e-10	5.89886e-09
SYN3	2.46439	7.00038e-10	9.35992e-09
LCN1	2.46307	7.12623e-23	9.93396e-21
ADGRE5	2.4614	4.80894e-06	2.5833e-05
GPI	2.45892	1.13736e-05	5.58373e-05
ORC5	2.4579	1.13127e-11	2.25554e-10
SLC39A7	2.45743	7.84736e-09	8.1993e-08
TNFRSF19	2.4552	0.0160164	0.0330686
GTF2E1	2.45337	1.92901e-17	1.14427e-15
ZNF468	2.4465	2.58097e-08	2.41468e-07
EXTL3	2.4452	5.23845e-09	5.6681e-08
PGK1	2.44354	9.04416e-12	1.84501e-10
NUDT22	2.44274	2.08774e-06	1.22755e-05
AREL1	2.43929	1.46479e-12	3.52056e-11
ADAM17	2.43872	4.09375e-08	3.65033e-07
ROPN1	2.43803	0.00184999	0.00504756
MAGEA2B	2.43727	2.41755e-35	9.17015e-33
EXOSC2	2.43432	1.34495e-12	3.26062e-11
RFC3	2.43176	3.05023e-08	2.80353e-07
TMEM39A	2.42912	6.79974e-12	1.42539e-10
IFT122	2.4286	1.21367e-10	1.8781e-09
ANKRD7	2.42706	5.30942e-14	1.708e-12
ENO2	2.42626	0.011013	0.0238571
LPAR1	2.42625	0.00588937	0.0139263
INPP5B	2.42611	5.77634e-15	2.32835e-13
BEST1	2.42402	0.00345195	0.00872533
RNF157	2.42339	0.000845595	0.00252862
ABHD10	2.41878	6.2243e-11	1.03499e-09
ALDH18A1	2.41757	5.5333e-12	1.18668e-10
LIG3	2.41522	2.12046e-10	3.09791e-09
NME7	2.4119	3.8062e-11	6.6323e-10
LGALS3BP	2.41156	0.000944547	0.00279504
TMEM231	2.40742	1.68649e-08	1.64166e-07
GRN	2.40694	6.98037e-05	0.000276373
RTCB	2.4061	2.68766e-11	4.83432e-10
GNG12	2.40197	1.56844e-06	9.50956e-06
B9D1	2.4017	3.21442e-07	2.32171e-06
ASH2L	2.39688	5.39821e-11	9.16764e-10
PIP5K1A	2.39677	3.54786e-13	9.79349e-12
PYGB	2.39569	0.000183699	0.000655487
PPAT	2.39387	1.30463e-10	2.00035e-09
IKBKE	2.39282	1.00017e-06	6.35186e-06
CCDC163	2.39268	5.6407e-07	3.82324e-06
IKBKAP	2.39247	3.64633e-15	1.51495e-13
SAAL1	2.39037	1.52565e-12	3.64068e-11
RETSAT	2.39032	0.00018454	0.000658065
NIM1K	2.39005	6.29685e-08	5.3824e-07
PLSCR4	2.38987	0.00108819	0.00316687
SLC25A44	2.38836	5.75364e-09	6.17363e-08
ASAH1	2.3872	0.00093237	0.00276243
SEC61A1	2.3869	9.34997e-11	1.48534e-09
PRPF8	2.3831	6.85065e-10	9.1825e-09
IDH3A	2.38223	1.08698e-12	2.71135e-11
ZMYND12	2.38165	4.38497e-07	3.05257e-06
C1R	2.37872	0.00496914	0.011993
RTN4IP1	2.3783	6.19045e-11	1.03039e-09
POLD2	2.37803	7.50529e-08	6.30263e-07
CBLL1	2.37739	1.23277e-16	6.50529e-15
PABPC5	2.3767	4.65672e-06	2.5112e-05
CEP41	2.37367	1.05221e-13	3.21193e-12
TEX30	2.37276	4.398e-07	3.0603e-06
DDIT4L	2.37225	0.00298951	0.00769244
TRIM51	2.37055	0.00795005	0.0180299
MMS19	2.36799	1.45404e-10	2.20119e-09
CDC6	2.36389	2.86518e-06	1.63971e-05
MLANA	2.36248	0.181974	0.259777
CERKL	2.36187	0.00334041	0.0084816
APEX2	2.36122	1.51646e-09	1.86799e-08
XRCC6	2.3566	3.89897e-10	5.43064e-09
P4HA1	2.35343	4.71293e-07	3.25642e-06
SEL1L	2.35118	7.26672e-09	7.64995e-08
SLC35A5	2.35109	1.4037e-13	4.14698e-12
CTSC	2.34989	5.89836e-06	3.11353e-05
BNIP3L	2.34792	5.58262e-08	4.83866e-07
FAP	2.34361	0.00156557	0.00435028
PIK3R4	2.34269	1.64559e-13	4.7461e-12
RNF123	2.34259	4.02755e-09	4.4766e-08
HARS	2.34215	3.52951e-12	7.88272e-11
ZC3HC1	2.34076	3.1955e-15	1.34646e-13
ARFGAP2	2.34016	6.34991e-11	1.05378e-09
TRAFD1	2.33916	2.19175e-13	6.21416e-12
PROCR	2.33691	0.00448659	0.0109469
TTC25	2.33438	2.74915e-09	3.14769e-08
NRSN2	2.33091	6.72408e-07	4.47951e-06
NSDHL	2.3305	2.58056e-09	2.97913e-08
SAE1	2.3286	2.95875e-10	4.20509e-09
RBBP4	2.32734	1.45466e-13	4.26157e-12
DPH2	2.32732	1.52295e-08	1.49331e-07
GSN	2.32707	0.000266305	0.00091605
CYBRD1	2.32589	0.0164898	0.0339246
LIPA	2.32553	5.11667e-07	3.50355e-06
POLR3C	2.32346	6.5759e-12	1.38193e-10
LRPAP1	2.32239	6.67476e-05	0.000265973
RUVBL1	2.32188	6.76157e-10	9.07542e-09
ENTPD7	2.32048	2.3458e-08	2.21573e-07
TMPPE	2.32041	1.06027e-10	1.66225e-09
PDGFRL	2.31956	0.000399093	0.0013134
FAM210A	2.31831	2.16804e-05	9.86318e-05
GLB1	2.31747	9.29254e-08	7.62736e-07
PRCP	2.31412	9.19576e-08	7.55905e-07
ALAS1	2.30877	8.29205e-09	8.63924e-08
CERS2	2.30684	3.32689e-09	3.76368e-08
AEN	2.30585	1.75235e-06	1.05103e-05
KIF20A	2.30025	4.01099e-05	0.000169477
POLR1B	2.29795	2.38039e-07	1.76895e-06
HSPA13	2.29755	2.99659e-06	1.705e-05
PGAM1	2.29731	1.3734e-07	1.08625e-06
PPIB	2.29661	5.56296e-08	4.82662e-07
PLS3	2.29517	2.719e-05	0.000121192
LARS2	2.29402	1.43491e-10	2.17617e-09
PCYT1A	2.29144	6.30159e-14	1.98518e-12
CLDN12	2.28916	1.0045e-07	8.19271e-07
MAGED2	2.28704	4.23253e-08	3.75607e-07
ELMO2	2.28611	2.67124e-10	3.81919e-09
PIP4K2C	2.28607	3.06222e-07	2.22233e-06
SMG8	2.28549	8.68024e-12	1.78601e-10
BOLA2	2.28536	1.23266e-08	1.23918e-07
HIST2H4A	2.28477	1.01253e-18	7.33228e-17
ZNF28	2.28319	1.56652e-06	9.50436e-06
APOBEC3C	2.28311	0.000262102	0.000903265
MAN2C1	2.28308	2.6026e-10	3.73701e-09
GBE1	2.2781	9.2052e-08	7.55938e-07
SLC6A15	2.2738	0.00251693	0.00663148
SLC35G2	2.27246	0.000577293	0.00181317
SC5D	2.27178	3.12304e-05	0.000136939
HOXB13	2.27099	0.0409132	0.0739727
CSRP1	2.26826	2.86071e-05	0.000126631
MPP2	2.2657	0.000522001	0.00165977
USB1	2.2624	1.43884e-09	1.78024e-08
B4GALT4	2.25721	7.75027e-11	1.25505e-09
HMGN2	2.25318	4.35197e-10	6.00659e-09
SKA3	2.25285	6.46391e-06	3.36848e-05
ABHD2	2.25043	0.0029819	0.00767404
IFI35	2.24985	0.00080199	0.00241376
CDH19	2.24852	0.0475454	0.084065
KPNA2	2.2471	3.23611e-05	0.000140973
RRP12	2.24685	2.27181e-08	2.15713e-07
TBRG4	2.24583	3.64203e-08	3.28608e-07
USP5	2.24295	6.07173e-09	6.48582e-08
WDR74	2.24119	1.981e-09	2.35725e-08
DUSP3	2.23977	3.87561e-05	0.000164672
SEC23A	2.23892	7.5832e-09	7.94313e-08
PIGN	2.23773	2.19275e-10	3.1896e-09
OGDH	2.23311	2.25651e-07	1.68739e-06
HOXA4	2.23259	0.00843456	0.0189871
PRDX1	2.23181	0.00640691	0.014963
CDCA8	2.2303	3.27538e-05	0.000142461
SLC31A1	2.22817	3.99422e-05	0.000168896
PIGV	2.227	1.24509e-09	1.56836e-08
BIRC5	2.22691	5.48419e-05	0.000223373
FAM178B	2.22614	0.10128	0.159334
DHDDS	2.22386	2.72774e-09	3.12746e-08
PEX19	2.22217	2.55822e-10	3.67645e-09
SOD2	2.22204	2.63658e-07	1.93952e-06
FASTKD2	2.22146	1.34995e-13	4.0039e-12
SF3A3	2.22028	1.01763e-14	3.83398e-13
ETV1	2.21974	0.00700619	0.016161
CA6	2.21968	1.25613e-05	6.11009e-05
NCR3LG1	2.21779	9.57159e-05	0.000366225
CCT5	2.21522	2.94203e-10	4.18489e-09
TARS2	2.21415	9.52031e-08	7.78757e-07
SPRYD3	2.21239	4.56082e-06	2.46585e-05
ECE2	2.21063	8.03909e-07	5.25099e-06
MIEF1	2.20985	6.81211e-11	1.11719e-09
MRGPRX4	2.20615	0.000972977	0.00286751
KIAA0319L	2.20419	5.03558e-11	8.60421e-10
FAM60A	2.20211	0.000206311	0.000727483
ATP6V0A1	2.20167	3.3584e-05	0.00014558
PIGT	2.20088	1.87874e-06	1.11564e-05
GNL2	2.20076	7.61689e-11	1.23824e-09
WDR6	2.20049	7.87432e-07	5.15746e-06
AP2B1	2.19661	5.15155e-12	1.11481e-10
ALDOA	2.19614	3.16381e-05	0.000138364
PCSK7	2.19263	2.0393e-07	1.53925e-06
GFM2	2.18973	2.91724e-08	2.69016e-07
INTS7	2.18727	1.9674e-10	2.89452e-09
SLC38A1	2.18599	0.0445144	0.0794194
RFC2	2.18392	2.78184e-08	2.57952e-07
TOMM34	2.18376	2.18575e-08	2.08337e-07
IL1RAPL1	2.17714	3.67255e-05	0.000156881
ZDHHC4	2.17603	1.26137e-07	1.00525e-06
GPATCH3	2.17341	9.02162e-09	9.32141e-08
SLAMF7	2.17302	0.0541089	0.0940692
ZNF490	2.17271	1.03445e-14	3.88862e-13
NUP93	2.17171	4.64946e-06	2.5081e-05
TNFAIP1	2.17162	5.46978e-14	1.74615e-12
NUCB1	2.16903	3.19712e-07	2.31221e-06
GIT2	2.1688	2.04609e-06	1.20603e-05
SHROOM2	2.16861	0.000618524	0.00192103
SEC23B	2.16785	6.07861e-11	1.0148e-09
C1S	2.16782	0.00897592	0.0200146
CLCC1	2.16769	4.69244e-09	5.12371e-08
CCL28	2.16425	0.000128403	0.000475414
CDCA5	2.16254	1.13758e-05	5.58373e-05
G6PC3	2.16195	1.02827e-05	5.12083e-05
NAT1	2.16149	7.2879e-08	6.13253e-07
SFXN3	2.16121	1.58479e-06	9.59129e-06
ATP10B	2.16103	0.00674579	0.0156336
MRPL49	2.16078	7.26614e-11	1.18352e-09
MAPRE1	2.15693	8.30078e-14	2.55719e-12
UBAP2L	2.15525	3.94432e-10	5.48467e-09
AURKA	2.15208	3.70721e-06	2.05345e-05
POLR2B	2.15195	4.55299e-12	9.91698e-11
WDR54	2.15163	0.000520659	0.00165613
TRPV4	2.15152	0.0342296	0.0635297
PIGB	2.1496	2.05595e-07	1.54918e-06
LOXL2	2.14911	0.00309888	0.00794576
API5	2.14821	4.52511e-11	7.77965e-10
TTI1	2.14756	1.4124e-10	2.14398e-09
PSEN1	2.14756	7.78712e-14	2.40928e-12
RCC1	2.147	2.21737e-07	1.66258e-06
HS1BP3	2.14578	5.51976e-07	3.75039e-06
HACL1	2.145	6.27276e-08	5.36456e-07
PDIA4	2.14427	9.00461e-05	0.000346893
FKTN	2.14052	8.75375e-11	1.39859e-09
PMPCA	2.13812	2.24956e-07	1.68445e-06
CXCL10	2.13749	0.0389874	0.0708892
STEAP1	2.13545	0.000604057	0.00188134
TMEM2	2.13114	0.000527644	0.00167453
ZDHHC12	2.12746	0.00026901	0.000923981
ALG12	2.12724	5.04554e-10	6.90686e-09
TMEM177	2.12596	8.06981e-06	4.11435e-05
DTX3L	2.12526	9.76903e-05	0.000373012
NDUFS2	2.12479	1.39905e-08	1.38645e-07
PBXIP1	2.12402	3.2582e-05	0.000141861
SUV39H1	2.12351	4.10276e-07	2.88124e-06
DPP3	2.12294	7.30171e-07	4.82779e-06
ALDH7A1	2.12227	9.23373e-06	4.64826e-05
ZCCHC17	2.12156	7.52695e-08	6.3052e-07
SLC12A8	2.12071	2.95349e-05	0.000130324
ZNF845	2.12068	1.87321e-07	1.42952e-06
CYB5B	2.11957	7.00001e-10	9.35992e-09
TMEM69	2.11836	4.84963e-13	1.29592e-11
TGFB2	2.1156	0.00296288	0.00763293
SPG20	2.11527	5.20011e-07	3.55631e-06
CTNNA1	2.11336	3.58308e-07	2.54729e-06
MAGEA2	2.11304	4.36678e-36	1.73923e-33
FCGR2B	2.1128	0.00254721	0.00669438
ETV4	2.11255	0.00114974	0.00331943
TOMM40L	2.11027	1.98862e-08	1.91511e-07
ARAF	2.10924	5.37245e-10	7.31248e-09
DDB1	2.10843	2.44264e-08	2.29941e-07
SKA1	2.10771	1.29573e-05	6.27714e-05
VIPAS39	2.10736	3.76908e-12	8.35089e-11
ASNS	2.10716	0.0244174	0.0475501
BACH1	2.10626	0.000249448	0.000864741
EIF3M	2.10533	3.26153e-10	4.59636e-09
ACO1	2.10187	3.43085e-06	1.9185e-05
MSMO1	2.10076	0.000351082	0.0011713
LMAN2L	2.10052	2.68138e-09	3.07853e-08
ACCSL	2.10008	0.00238633	0.00632472
CDKAL1	2.09992	2.57897e-13	7.23842e-12
MCM7	2.09836	1.44368e-05	6.89407e-05
EME1	2.09652	3.54973e-06	1.97735e-05
ZMAT5	2.09607	2.03921e-06	1.20282e-05
CALR	2.0947	2.06858e-07	1.558e-06
EXOSC10	2.09313	2.57113e-11	4.66144e-10
CRB1	2.09272	2.08606e-07	1.56905e-06
PPP1CA	2.09169	7.05545e-07	4.68719e-06
PIH1D2	2.09085	6.39278e-14	2.01012e-12
LRRC17	2.08949	0.000996343	0.00292541
KIAA1524	2.0877	1.27205e-05	6.17855e-05
AAR2	2.08719	5.69107e-11	9.62591e-10
ROBO1	2.08676	0.00656708	0.0152894
PIGO	2.08556	3.72289e-06	2.06009e-05
SUPV3L1	2.08554	1.74718e-11	3.30621e-10
PKLR	2.08535	0.0466138	0.0827151
DGKI	2.083	0.00365196	0.0091713
ESPL1	2.07961	3.75086e-05	0.000160022
CPA2	2.07705	0.00160357	0.00444484
KYAT1	2.07702	5.1686e-08	4.5149e-07
ABCB8	2.07531	4.64277e-05	0.000192524
CPSF3	2.07081	2.9877e-13	8.31585e-12
AK2	2.07065	6.23457e-09	6.6428e-08
FNTB	2.0704	1.21669e-05	5.94417e-05
FAM133A	2.06978	0.0101743	0.0222798
FBXO10	2.06952	1.22099e-07	9.76325e-07
HNRNPK	2.06865	8.58661e-19	6.28624e-17
WDR25	2.06828	2.29429e-07	1.7128e-06
WDR31	2.06813	1.61181e-06	9.72668e-06
HPGD	2.06712	0.110569	0.171322
ZNF256	2.06691	7.75222e-07	5.08546e-06
CENPN	2.06686	2.25433e-07	1.68651e-06
ZNF441	2.06646	3.26919e-05	0.000142229
COCH	2.06581	0.0156484	0.0324009
C1orf74	2.06553	2.3966e-09	2.79066e-08
RPAP1	2.06516	6.4687e-08	5.5124e-07
LHFPL1	2.06411	0.000249476	0.000864741
PLAUR	2.06235	0.0169271	0.0347047
AGT	2.0619	0.0927184	0.147756
RIPK4	2.06142	0.0940227	0.149564
FAM86B1	2.06073	2.30321e-07	1.71694e-06
PYROXD2	2.05855	0.0438134	0.0783527
TMEM107	2.05831	1.06961e-06	6.73661e-06
RNF4	2.05766	2.71692e-12	6.21732e-11
RND3	2.05748	0.0191983	0.0386461
ATP6V1B2	2.05589	0.000115701	0.000432989
LGALS8	2.05504	5.17121e-05	0.000211605
CENPL	2.05358	4.64876e-09	5.07932e-08
IQCB1	2.0528	2.92618e-07	2.13472e-06
BST2	2.05186	0.0692697	0.115643
TLDC1	2.0505	5.34212e-11	9.08161e-10
COPB1	2.05005	3.70102e-09	4.13565e-08
MCM10	2.04945	4.9102e-05	0.000202221
PARP9	2.0484	0.000256088	0.000884592
HK1	2.04812	3.338e-06	1.87373e-05
IDH1	2.048	1.79352e-05	8.31542e-05
TSPAN31	2.04731	3.78559e-06	2.09133e-05
TMLHE	2.04668	1.36437e-10	2.07861e-09
ORC1	2.046	4.20113e-05	0.000176486
STIP1	2.04593	4.9321e-08	4.33093e-07
PSMD4	2.04309	8.67201e-09	8.99909e-08
TRIM68	2.04124	4.27354e-07	2.98488e-06
ZW10	2.04116	5.05249e-10	6.91071e-09
CYB5D2	2.03976	5.27852e-05	0.000215574
TVP23B	2.03906	1.97084e-09	2.34817e-08
PSEN2	2.03889	0.00259119	0.00679822
TRAF3IP2	2.03693	0.00328972	0.00837729
PGD	2.03637	2.43006e-05	0.000109348
TPI1	2.03636	2.98159e-05	0.00013146
METAP1	2.03414	1.66976e-10	2.4939e-09
ALX1	2.03349	0.00625161	0.0146423
POLDIP3	2.03295	4.35712e-06	2.36796e-05
RNF20	2.02989	4.84828e-12	1.05191e-10
LAMA1	2.02897	0.053524	0.0931588
STK26	2.02812	0.00744345	0.0170276
AURKB	2.0265	0.00218763	0.00585984
WDHD1	2.02632	2.75217e-07	2.02011e-06
TMEM179B	2.02623	3.80649e-06	2.09941e-05
MINDY1	2.0249	5.77134e-06	3.05419e-05
RFWD3	2.02483	5.70348e-10	7.74415e-09
TUT1	2.02274	7.15418e-09	7.55048e-08
IFT172	2.02234	7.99242e-05	0.000311576
AATF	2.02185	7.18204e-09	7.57157e-08
LBR	2.02133	5.64643e-05	0.000228923
NCAPH	2.0213	7.77312e-05	0.000304019
CHRNA6	2.02026	0.0173245	0.0354208
BBS12	2.01958	1.01015e-06	6.40144e-06
MCCC1	2.01893	1.11847e-08	1.13876e-07
ADAT1	2.01878	4.43142e-08	3.92215e-07
NAPA	2.01848	2.4114e-06	1.39965e-05
HDHD2	2.01802	1.33325e-07	1.05699e-06
SMARCAL1	2.01697	1.37611e-15	6.20472e-14
ABCF3	2.01545	1.45893e-07	1.14577e-06
BUD31	2.01525	3.48295e-08	3.15959e-07
WIPI1	2.01508	0.019844	0.0397497
KIF18B	2.01399	0.000148717	0.000542583
RPN2	2.01077	5.99177e-09	6.40859e-08
ELP3	2.01059	6.51339e-12	1.37052e-10
FAM234A	2.01018	3.24952e-06	1.83085e-05
FANCI	2.00919	3.47779e-06	1.94181e-05
PPIL2	2.00845	5.89413e-08	5.07517e-07
RINT1	2.00818	4.27145e-07	2.98466e-06
FARSA	2.0046	8.93604e-07	5.74268e-06
EBP	2.00437	0.000103698	0.000393885
TOR1AIP1	2.00206	2.76379e-08	2.56563e-07
TAP2	1.9998	0.0002671	0.000918407
TMEM199	1.99861	3.08375e-13	8.55471e-12
CAV1	1.99809	0.00381715	0.0095204
NUP88	1.99657	5.15428e-08	4.50474e-07
SCO2	1.99629	0.00120289	0.0034544
GEMIN4	1.99617	4.2362e-07	2.9625e-06
ZNF317	1.99564	2.53801e-13	7.13543e-12
BTN2A2	1.99282	8.90824e-05	0.000343515
TIMM10B	1.99083	2.0334e-11	3.77941e-10
DHX35	1.98882	1.41999e-12	3.41779e-11
ZSCAN22	1.98728	2.60126e-13	7.28874e-12
ANKMY2	1.98723	3.14779e-06	1.77833e-05
EHHADH	1.98558	5.34275e-06	2.84901e-05
PNMAL1	1.98527	0.0248424	0.0482429
DHX38	1.98376	1.49614e-09	1.84704e-08
ARF1	1.98366	3.00456e-10	4.26295e-09
NEURL2	1.98306	4.105e-05	0.000173056
ZNF79	1.98275	2.53691e-09	2.93482e-08
ZNF613	1.98237	3.00862e-10	4.2651e-09
GART	1.98213	1.1516e-10	1.79033e-09
CSTF2	1.98194	5.84915e-12	1.24484e-10
HSD17B7	1.98161	5.67104e-05	0.000229865
MCM2	1.98075	0.000377335	0.00124942
INTS6L	1.97762	0.000675226	0.00207708
ATG9B	1.97748	7.32486e-07	4.84118e-06
CREB5	1.97725	0.0136174	0.0287071
ZDHHC9	1.97564	5.99339e-07	4.03613e-06
TOP3A	1.97524	9.37703e-08	7.68916e-07
KIF15	1.9726	0.000119011	0.000444083
TIGAR	1.97256	1.70859e-06	1.027e-05
SERPINB8	1.97021	0.00169111	0.00465584
CSTF2T	1.96968	7.59785e-11	1.23635e-09
CAP1	1.96904	4.93341e-09	5.35536e-08
ALDH1B1	1.96886	0.041522	0.0748793
CLPB	1.96876	2.0728e-05	9.48667e-05
GAGE12J	1.9687	1.58168e-05	7.46355e-05
ZFP3	1.96859	0.000524448	0.00166628
TMEM140	1.96805	0.000454482	0.00147109
DPAGT1	1.96798	8.09829e-07	5.27724e-06
WLS	1.96762	0.0120398	0.025791
CKAP5	1.96717	9.68565e-10	1.25046e-08
HPS5	1.96555	0.00217755	0.00583843
CHMP6	1.96493	4.16684e-05	0.000175265
CEP19	1.96357	1.77046e-07	1.3573e-06
ODF2	1.96242	3.46462e-07	2.47888e-06
FBXW9	1.96206	5.58848e-06	2.96964e-05
SIAE	1.96178	0.000278847	0.000953507
PGM3	1.96148	1.60261e-06	9.67817e-06
EPRS	1.96117	7.24753e-09	7.63455e-08
UTP15	1.96105	6.98777e-11	1.14263e-09
TXNRD1	1.961	1.14781e-06	7.18313e-06
UBA1	1.95819	1.45846e-08	1.43936e-07
PSAP	1.95814	0.000169022	0.000608435
IQCK	1.958	4.49793e-05	0.000187382
TMEM98	1.95663	0.0272461	0.0522436
RARB	1.95656	0.0263896	0.0507957
CHD1L	1.95644	1.08061e-07	8.7495e-07
BFSP1	1.95486	0.00289358	0.00747845
HARBI1	1.95291	5.02706e-10	6.89284e-09
DDX56	1.95177	2.96649e-07	2.15942e-06
PPP1R36	1.95007	2.23881e-06	1.30993e-05
DRG2	1.95002	1.39396e-07	1.09992e-06
ZSCAN20	1.94922	2.75771e-15	1.17084e-13
CHRDL1	1.94766	0.0786375	0.128587
TRIM5	1.94664	2.43155e-05	0.000109371
EFL1	1.94443	4.91373e-10	6.74852e-09
RBBP5	1.94373	8.33724e-10	1.10248e-08
CD99L2	1.94203	0.000298683	0.00101264
LDHB	1.94068	0.000142568	0.000521968
GBF1	1.93967	1.39555e-07	1.10065e-06
NUP160	1.93949	6.85466e-08	5.8117e-07
AAMP	1.93786	2.03756e-09	2.41391e-08
CDK20	1.93608	5.58947e-07	3.79313e-06
BRMS1	1.93439	5.06216e-06	2.71149e-05
CCDC22	1.93248	3.46282e-07	2.47865e-06
RRM1	1.93207	1.72455e-07	1.32697e-06
TRIM16L	1.9316	1.69087e-05	7.91629e-05
ATP5A1	1.93136	8.45805e-09	8.79343e-08
CCDC134	1.93075	1.24419e-05	6.05906e-05
UPRT	1.93027	1.24187e-12	3.04157e-11
DDX49	1.9298	1.88507e-07	1.43726e-06
DDB2	1.92932	0.00117924	0.00339465
TMED9	1.92852	3.52865e-07	2.51608e-06
LAMP2	1.92753	1.23687e-05	6.0304e-05
RNASEL	1.92663	4.83646e-07	3.32803e-06
CDK2	1.92617	0.0321016	0.0602081
SLC25A40	1.9255	1.54685e-07	1.20689e-06
TGOLN2	1.92544	1.57351e-07	1.22427e-06
MTCH2	1.92516	3.10452e-07	2.24913e-06
NRIP3	1.92426	0.0050102	0.0120782
AP3M1	1.92394	8.68738e-09	9.00387e-08
KRT12	1.92391	0.000119048	0.000444118
CHAC1	1.923	0.0218068	0.0431544
LBHD1	1.92226	2.54641e-07	1.87814e-06
SOSTDC1	1.91956	0.149818	0.220942
G3BP1	1.91922	1.91035e-09	2.2875e-08
ACAD9	1.9182	3.2234e-10	4.5503e-09
PNPO	1.91742	5.42342e-06	2.88835e-05
KDELR3	1.91693	0.00724383	0.0166426
PWP2	1.91285	0.000572854	0.00180126
ARL6	1.9127	2.18833e-07	1.64154e-06
STYXL1	1.91243	0.0001092	0.000412439
ZNF287	1.90814	0.000108908	0.000411523
PRR9	1.90809	2.15536e-05	9.82153e-05
ROPN1B	1.9052	0.00163166	0.00450848
FAM120B	1.90467	3.05857e-08	2.80965e-07
CSTF1	1.90335	6.31744e-15	2.51615e-13
CDC20	1.90233	0.00447573	0.0109267
KIT	1.90208	0.197739	0.278176
MFN2	1.902	7.47211e-09	7.8415e-08
SEMA3D	1.90141	0.0217412	0.0430602
RAB17	1.89935	0.0904952	0.144987
IL24	1.89801	0.0178006	0.0362558
PCYT1B	1.89781	0.000319045	0.00107514
RPA1	1.89769	3.71242e-08	3.3352e-07
ARF4	1.89662	1.04124e-07	8.45525e-07
ACP2	1.89596	1.49663e-06	9.13708e-06
LIN7C	1.8957	5.81737e-07	3.92391e-06
ARNT	1.89487	3.00903e-08	2.76718e-07
CLTC	1.89481	5.79048e-08	5.00068e-07
IDI1	1.89434	2.72556e-05	0.00012142
XPNPEP1	1.89386	1.39335e-05	6.67324e-05
MED27	1.89354	2.29528e-07	1.7128e-06
ZNF225	1.892	8.83341e-11	1.40997e-09
ZNF813	1.89106	2.53087e-05	0.00011335
RNF121	1.89066	4.20368e-07	2.94346e-06
SRPRA	1.89041	5.69509e-06	3.02053e-05
PDHA1	1.89039	1.46586e-08	1.44581e-07
SLC25A19	1.88856	1.07454e-06	6.76257e-06
CA14	1.88784	0.21158	0.293573
PMS2	1.88667	9.73357e-09	1.00076e-07
HS6ST2	1.88642	0.0389084	0.0707765
ZFYVE1	1.8861	8.45603e-07	5.47629e-06
OGFOD2	1.885	6.34528e-08	5.41408e-07
ECE1	1.88371	0.00644767	0.0150428
GTF2H1	1.88369	9.79168e-08	7.99781e-07
CPQ	1.88291	0.0771095	0.126559
SLC37A3	1.88181	6.37779e-06	3.32983e-05
PPEF1	1.88105	0.000110636	0.000416924
CTPS1	1.87652	3.35585e-06	1.88188e-05
MELK	1.87555	0.000198037	0.00070141
GTPBP4	1.87527	8.19341e-07	5.33098e-06
C11orf49	1.87126	4.377e-07	3.0495e-06
RABGEF1	1.87043	3.20599e-11	5.71137e-10
MFAP3	1.87037	4.21143e-06	2.29625e-05
DSCR8	1.86948	0.0817254	0.132987
ABCB6	1.86929	0.00293973	0.00758183
UBE4A	1.86822	7.8098e-06	3.9903e-05
ST6GAL1	1.86707	0.00882785	0.0197133
FMO4	1.86681	0.000858288	0.00256109
TMEM246	1.86599	0.0428023	0.0768402
SLC50A1	1.86453	4.1867e-06	2.28425e-05
ZNF394	1.86389	1.13758e-10	1.77182e-09
PPP5C	1.86348	1.53993e-09	1.89368e-08
TMEM209	1.86245	1.27767e-06	7.89656e-06
GYG1	1.86198	3.33628e-09	3.7709e-08
LYPD8	1.86194	0.00300295	0.00772345
PELO	1.86184	3.37545e-07	2.42337e-06
C7orf49	1.86127	5.25462e-10	7.1696e-09
MKLN1	1.86017	2.66062e-09	3.06099e-08
VCL	1.85943	2.4734e-06	1.43315e-05
E2F8	1.85828	0.000239338	0.000833398
DERL3	1.85772	0.00277764	0.00721945
DUSP10	1.85718	0.0463355	0.0822825
ST6GALNAC3	1.85715	0.00999218	0.0219183
SNX11	1.85567	6.72829e-08	5.71904e-07
LAMC1	1.85549	0.000577491	0.00181345
TP53BP1	1.85382	2.99195e-06	1.70294e-05
C1GALT1	1.85238	0.000132708	0.000488975
IFIT3	1.85199	0.01295	0.0274733
PHLDB1	1.85129	0.000560227	0.00176654
ATP5B	1.85078	1.38903e-05	6.65586e-05
PAGE1	1.84973	0.10503	0.164261
MMP1	1.84884	0.0978448	0.154714
DKC1	1.84873	1.36869e-11	2.66226e-10
ABCG2	1.84824	3.3844e-05	0.000146537
UPP1	1.84803	0.0389256	0.0707924
ATG101	1.84788	1.91593e-05	8.83643e-05
RRM2	1.84593	0.00200002	0.00541102
L3MBTL2	1.84536	1.74051e-05	8.10332e-05
XYLB	1.84515	0.000331052	0.00111157
GAA	1.84448	0.00194667	0.00528805
ZNF614	1.84421	2.61042e-06	1.50576e-05
CD68	1.84409	0.010117	0.022163
THAP1	1.84275	2.72796e-11	4.89104e-10
NUP107	1.84203	1.53575e-05	7.27146e-05
TMED10	1.84155	1.24005e-08	1.24586e-07
ZKSCAN5	1.83986	2.99379e-11	5.35616e-10
GLA	1.8398	0.000175533	0.000629705
ZNF155	1.83944	1.94996e-06	1.15302e-05
C15orf41	1.83803	3.6347e-06	2.01863e-05
CKS1B	1.83662	8.49903e-07	5.49988e-06
PNMA2	1.83541	0.0402142	0.072827
ANLN	1.83516	0.000414911	0.00135771
VPS33A	1.83265	2.21802e-10	3.22355e-09
POT1	1.83258	4.8309e-07	3.32557e-06
ZNF563	1.8314	5.16685e-07	3.53501e-06
CSMD1	1.82948	0.00104161	0.00304669
XPC	1.82852	7.33917e-07	4.84872e-06
SVIL	1.82688	0.00123669	0.00353933
TOE1	1.82681	3.90759e-08	3.49552e-07
PSMD7	1.8267	1.79365e-08	1.73535e-07
HSP90B1	1.82618	4.55018e-05	0.000189248
UMPS	1.82543	3.63139e-11	6.36595e-10
ATP6V0D1	1.82327	0.00015951	0.000577676
STPG1	1.8226	4.36156e-05	0.000182491
ZNF200	1.82166	1.65716e-09	2.01754e-08
PEX16	1.8166	5.68385e-05	0.000230217
MKRN2	1.81309	3.25162e-10	4.58626e-09
PTPRZ1	1.80933	0.167284	0.242091
HMCES	1.80616	6.88061e-08	5.83074e-07
PAICS	1.80491	4.25876e-08	3.77734e-07
KIFAP3	1.8032	4.3231e-06	2.351e-05
ESCO2	1.80308	1.25745e-05	6.11473e-05
DHX8	1.8022	2.11568e-08	2.02466e-07
PSMC3	1.80145	5.55884e-07	3.77541e-06
PGM2	1.80144	1.98234e-05	9.12008e-05
HUS1	1.80101	1.15257e-09	1.4573e-08
SRPRB	1.79934	5.6673e-07	3.83661e-06
FASTKD5	1.79803	4.50066e-08	3.97923e-07
FAM162A	1.79632	3.35699e-07	2.41219e-06
CXorf40A	1.79572	2.6979e-09	3.09537e-08
GSS	1.79473	1.28252e-06	7.92247e-06
HNRNPH2	1.79434	8.3464e-12	1.72582e-10
TANGO2	1.79428	0.00338409	0.00856803
SKIV2L	1.7935	1.04588e-05	5.19614e-05
ARHGAP31	1.7928	0.00147419	0.00412792
GABRA3	1.79222	0.0467654	0.0829138
EXO5	1.79205	3.57906e-06	1.99236e-05
NT5C2	1.79184	1.85638e-06	1.10393e-05
MPI	1.79181	2.40596e-05	0.000108394
APOO	1.79124	1.49043e-05	7.08353e-05
DCAF11	1.7904	1.56996e-06	9.51534e-06
ZNF484	1.78815	4.47314e-09	4.90667e-08
CTR9	1.78743	3.43553e-09	3.86799e-08
NRBP1	1.78715	1.24705e-07	9.94785e-07
NBR1	1.78583	3.87608e-07	2.73583e-06
TPX2	1.78563	0.000291776	0.000992443
TMEM186	1.78557	2.81666e-09	3.22058e-08
CCNB1	1.78238	6.10883e-05	0.000245548
UBE2L6	1.78185	0.0115379	0.0248774
JKAMP	1.78132	8.64534e-11	1.38524e-09
ZNF221	1.78115	1.65735e-10	2.47979e-09
PLOD3	1.77938	0.00192903	0.00524441
FTO	1.77856	1.78705e-09	2.15996e-08
HDLBP	1.77802	5.82015e-06	3.0771e-05
KATNB1	1.77597	6.8889e-06	3.57104e-05
FAM19A3	1.7749	0.0237498	0.0464012
C2orf42	1.77352	1.37213e-12	3.31211e-11
COG5	1.77296	3.34519e-07	2.40578e-06
C19orf48	1.77265	0.000696521	0.00213083
SLC39A1	1.77254	7.48421e-07	4.92959e-06
IPO9	1.77249	1.4374e-07	1.13045e-06
AHRR	1.77238	0.00501574	0.0120859
CD59	1.77107	0.00407663	0.0100685
CDC42SE1	1.77067	4.60098e-07	3.18565e-06
ALG11	1.77067	4.84114e-09	5.27358e-08
STAG1	1.77017	5.0183e-06	2.69008e-05
GOSR2	1.77	1.68328e-09	2.0447e-08
AP1G1	1.76966	2.32687e-09	2.72005e-08
TMBIM6	1.76901	1.61543e-08	1.5766e-07
ANGPT2	1.76874	0.0116884	0.0251509
AGPAT5	1.76865	3.75677e-06	2.07746e-05
DDX31	1.76761	1.3204e-08	1.3171e-07
PREPL	1.76662	1.10923e-06	6.96253e-06
STK11IP	1.76626	3.32586e-06	1.86821e-05
ARMCX3	1.76566	0.00403492	0.00998316
NCAPD2	1.7653	1.506e-05	7.14677e-05
ZNF880	1.76361	0.00295411	0.00761305
WRAP53	1.76278	6.86229e-06	3.55835e-05
TRIM16	1.7616	4.38444e-05	0.00018322
WDR19	1.76087	1.99801e-06	1.18018e-05
EIF3I	1.76011	1.58779e-07	1.2325e-06
MTRR	1.75992	9.07157e-06	4.57765e-05
DLD	1.75973	1.25965e-07	1.00436e-06
NLGN3	1.75868	0.034381	0.063747
NUBP1	1.75752	8.47479e-08	7.02509e-07
METTL18	1.75716	1.02814e-08	1.0532e-07
KAT5	1.75677	1.17062e-06	7.3122e-06
TSSC1	1.75674	3.18096e-08	2.91408e-07
SLC2A6	1.75659	0.0134721	0.0284619
WDCP	1.75607	2.68026e-09	3.07853e-08
CCNF	1.75573	0.000166703	0.000600993
APIP	1.7548	9.45131e-10	1.23036e-08
PDGFD	1.75466	0.0412528	0.0744901
GRIK2	1.75384	0.0225481	0.0443746
STRA6	1.75257	0.101308	0.159365
TMX2	1.75073	4.204e-08	3.73669e-07
PITPNB	1.75073	3.25348e-07	2.34789e-06
SAMD9	1.74798	0.00720854	0.0165775
MTMR2	1.74773	6.3595e-07	4.26722e-06
CHN2	1.74752	0.00939642	0.0208052
HSPA8	1.74713	2.18204e-06	1.28074e-05
METTL13	1.74484	6.02266e-06	3.17014e-05
KPNA6	1.74478	3.97538e-09	4.42449e-08
DEPDC1B	1.73958	0.000174796	0.000627196
HIF1A	1.73945	4.20741e-06	2.2948e-05
XRRA1	1.7391	0.000329089	0.0011052
SDSL	1.73884	0.00342568	0.00866678
FIBP	1.73855	5.78556e-05	0.000233996
ATIC	1.73698	5.09586e-07	3.49073e-06
C11orf70	1.73695	2.2758e-05	0.000103002
TIMELESS	1.73559	0.000128857	0.000476883
APMAP	1.73539	1.10641e-06	6.95007e-06
ZFP69B	1.7343	0.00033933	0.00113594
PSMD1	1.73316	2.95623e-09	3.37325e-08
AGK	1.73113	3.84104e-07	2.71683e-06
OGFOD1	1.72932	9.1534e-09	9.4459e-08
CNDP2	1.7268	5.1439e-05	0.000210642
POLR2C	1.72669	1.96126e-08	1.89095e-07
COQ8B	1.72631	1.8038e-05	8.36076e-05
NIPAL3	1.72511	0.0179573	0.0365349
APOD	1.72451	0.26438	0.352901
MAGEA4	1.72419	0.289811	0.380202
SLFN5	1.72412	0.00146412	0.00410385
TFB2M	1.72282	3.00988e-06	1.7114e-05
ATP6V1A	1.7224	1.33626e-07	1.05888e-06
ZNF57	1.72215	4.01579e-09	4.4665e-08
SLC7A6OS	1.72185	1.14683e-06	7.17968e-06
CXorf40B	1.72172	4.28582e-09	4.72288e-08
MID1	1.72155	0.0156046	0.0323302
GMPPA	1.72113	0.000166982	0.000601609
R3HCC1	1.7211	6.47336e-05	0.000258749
COASY	1.72009	1.29158e-07	1.02785e-06
PLPPR1	1.72003	0.000254508	0.000880358
ASL	1.71968	0.000117712	0.000439822
ELOA	1.71945	2.18381e-06	1.28133e-05
HSPBAP1	1.7187	1.17296e-09	1.48197e-08
SPRTN	1.71823	1.81349e-10	2.68223e-09
PCCB	1.71801	2.91827e-05	0.000129008
VAMP7	1.71787	2.60456e-06	1.50342e-05
VAMP7	1.71787	2.60456e-06	1.50342e-05
POLE3	1.71756	1.68772e-08	1.64166e-07
ZNF384	1.7169	5.45113e-07	3.71129e-06
BMP8B	1.71551	0.121804	0.185535
RAD54L	1.71539	0.000884027	0.00263085
CTNNBL1	1.71475	1.03601e-08	1.05996e-07
MPZL3	1.714	0.000265913	0.000915106
SELENOT	1.71364	1.13336e-05	5.56632e-05
PSMD2	1.71328	1.08222e-05	5.34712e-05
ZNF177	1.71106	5.65667e-07	3.83097e-06
HMG20A	1.71029	1.1242e-05	5.52942e-05
CBLB	1.70867	4.56713e-05	0.000189811
SDHC	1.70854	7.00539e-10	9.35992e-09
TBC1D13	1.70769	2.15335e-05	9.81504e-05
GINS1	1.70711	0.000156334	0.000567277
BUB1	1.70657	0.00035246	0.00117519
SNRPB2	1.70655	0.000192963	0.000685037
AKIP1	1.70385	1.82414e-06	1.08708e-05
CSE1L	1.70345	3.65161e-07	2.59204e-06
TNFRSF14	1.70295	0.0468066	0.0829693
SEC22A	1.70237	3.21485e-11	5.72106e-10
C11orf98	1.70181	6.05412e-05	0.000243739
LRRC46	1.70097	4.7448e-06	2.55376e-05
ZNF41	1.70086	8.57479e-08	7.09423e-07
ASF1B	1.70067	0.00268172	0.00700059
TNPO3	1.70066	1.58944e-09	1.94643e-08
FTSJ1	1.6992	8.92613e-09	9.23987e-08
NMD3	1.69888	2.21788e-05	0.000100598
CENPM	1.69842	0.0109052	0.0236605
QTRT2	1.69691	7.9236e-11	1.28064e-09
TMEM135	1.69681	3.23601e-05	0.000140973
CYB561D1	1.69681	1.06218e-05	5.2615e-05
SMU1	1.69673	1.77708e-09	2.14945e-08
CASP4	1.69495	0.00395153	0.00979835
ALKBH3	1.6941	7.69464e-09	8.04978e-08
EIF5A2	1.69367	0.000468001	0.00150726
GPC6	1.69348	0.0818589	0.133178
CLTCL1	1.69307	0.00349438	0.00882057
BUB1B	1.69304	0.000805782	0.0024243
CDK5RAP1	1.69299	2.3921e-09	2.7885e-08
DIABLO	1.6928	7.63343e-10	1.01263e-08
TCTN2	1.69258	0.000236986	0.000826081
TTK	1.69244	0.000296535	0.00100679
FARP2	1.69179	0.00134797	0.00381474
GNS	1.691	0.00262793	0.00688167
NOLC1	1.69055	1.07717e-06	6.77659e-06
OASL	1.6903	0.0115178	0.0248447
CNPY4	1.68975	0.000202509	0.000715884
TMEM173	1.68911	0.00111454	0.00322895
MYH10	1.6886	0.0201994	0.0404036
GFM1	1.68856	3.36264e-08	3.06041e-07
ARPC1A	1.68778	1.87089e-06	1.11177e-05
TSNAX	1.68746	0.000122448	0.000455782
SLC25A26	1.68555	7.52719e-08	6.3052e-07
PRMT1	1.68376	3.43146e-06	1.9185e-05
FAM126A	1.68292	0.000620618	0.00192682
FBXO6	1.68227	0.0136144	0.0287045
ZNF649	1.68143	0.00309477	0.00793763
CCPG1	1.68092	0.0060521	0.0142328
ERMAP	1.67992	8.25315e-08	6.85231e-07
MARCH3	1.67918	0.00207247	0.00558851
OLFML3	1.67915	0.102646	0.161166
NUDC	1.67906	1.68182e-05	7.88169e-05
BSCL2	1.6789	0.00110573	0.00320733
EXOC7	1.67889	1.24536e-06	7.71858e-06
GPR3	1.67799	0.0038798	0.00965219
NSF	1.67762	1.90732e-06	1.13141e-05
RIOK3	1.67594	2.72004e-06	1.56521e-05
SLC30A9	1.67562	3.3047e-08	3.01259e-07
DCTN4	1.67557	7.41045e-07	4.89002e-06
GALE	1.67549	0.00429603	0.0105527
RNF138	1.67354	6.83385e-05	0.000271214
COMMD2	1.67342	3.31873e-06	1.86545e-05
GTF3C1	1.67335	2.79707e-06	1.60403e-05
COQ5	1.67136	2.0111e-07	1.52225e-06
COG6	1.67108	7.78736e-05	0.000304433
VPS35	1.6693	1.71615e-08	1.66809e-07
DKK3	1.6688	0.0961664	0.152423
DBR1	1.66837	1.75554e-09	2.12493e-08
MTAP	1.66818	0.0330935	0.0617569
ARG2	1.66759	0.00683053	0.0157994
MDH2	1.66729	1.7329e-05	8.074e-05
NUP205	1.66719	2.82356e-08	2.61387e-07
CTSL	1.66717	0.0453679	0.0807183
CIPC	1.66651	3.08709e-06	1.74698e-05
ASTN2	1.66522	0.0157434	0.0325775
DDX3X	1.66417	4.27364e-05	0.000179261
DNASE2B	1.6641	0.153057	0.224873
HDX	1.66358	3.16466e-07	2.29072e-06
TRUB2	1.66351	1.83404e-06	1.0922e-05
INTS4	1.66338	0.00119488	0.00343555
FITM2	1.66319	1.90679e-06	1.13141e-05
ZNF14	1.66309	4.51339e-05	0.000187904
MTFR2	1.66078	3.94555e-05	0.000167134
SPARCL1	1.66006	0.0782067	0.128008
AAGAB	1.66	1.45462e-09	1.79826e-08
OTUB2	1.65844	7.59223e-05	0.000297361
KXD1	1.65832	8.82037e-10	1.15905e-08
ZNF572	1.65663	2.21111e-05	0.000100367
C16orf89	1.65656	0.088621	0.142412
IFT57	1.65642	7.12255e-06	3.67962e-05
APH1B	1.65559	0.00157833	0.00438139
NSUN3	1.65188	4.22512e-10	5.84597e-09
ZNF112	1.65172	8.4747e-06	4.29981e-05
MORN4	1.65075	2.04717e-05	9.39251e-05
DCAF8	1.65027	2.15779e-08	2.05844e-07
SEC61A2	1.64927	1.79031e-05	8.30514e-05
TMEM67	1.64916	0.00149554	0.00418071
LAS1L	1.64887	2.46784e-10	3.55268e-09
TCOF1	1.64844	2.16337e-05	9.8473e-05
HEXIM2	1.64786	6.39681e-06	3.33765e-05
FKBP15	1.6467	5.98928e-07	4.03498e-06
XPO7	1.64627	2.86437e-07	2.09328e-06
SENP2	1.64531	6.77316e-09	7.18006e-08
EIF2S1	1.64218	1.98975e-08	1.91511e-07
SNUPN	1.64138	6.34685e-08	5.41408e-07
SDE2	1.64031	3.52737e-07	2.51608e-06
ZNF737	1.64023	7.98206e-05	0.000311244
GYG2	1.63784	0.127367	0.192692
CLCN2	1.63751	0.000253611	0.000877619
HMGCL	1.63726	0.000166308	0.000599697
PFAS	1.63692	3.13186e-05	0.000137254
APTX	1.63674	1.97357e-08	1.90172e-07
TES	1.63582	0.0339274	0.0630598
HENMT1	1.63551	0.0430765	0.0772745
NUDCD3	1.63511	1.56701e-06	9.50436e-06
FNDC3B	1.63443	0.000597609	0.00186403
SNRNP40	1.63398	1.18176e-07	9.49955e-07
UBXN11	1.63324	0.0012259	0.00351266
EIF4G2	1.63105	1.82389e-06	1.08708e-05
CPED1	1.6288	0.0258361	0.0499175
LMAN2	1.62784	5.01749e-05	0.00020597
ZNF595	1.62601	0.00604298	0.0142196
DCAF1	1.6258	2.06431e-08	1.98345e-07
IMMT	1.62453	1.72056e-08	1.6714e-07
SLC39A9	1.62446	1.7301e-08	1.6797e-07
ZSCAN25	1.62395	3.17785e-09	3.61066e-08
WDR46	1.62308	0.000133718	0.000492405
XRCC1	1.62123	2.8181e-06	1.61553e-05
NCOA4	1.62088	3.79963e-06	2.09701e-05
IBTK	1.62056	0.000177736	0.000636379
SLC1A4	1.62041	0.115259	0.177276
IL20RB	1.62012	3.93783e-07	2.7759e-06
ZMPSTE24	1.61919	2.76976e-08	2.56975e-07
GPR155	1.61868	0.0468812	0.0830649
NUP214	1.61777	1.67504e-05	7.85316e-05
WWP2	1.61748	3.26138e-05	0.000141963
TBC1D14	1.61645	0.00166005	0.00457938
ASB9	1.61638	0.0274203	0.0525595
SLC35C2	1.61636	9.92957e-06	4.96716e-05
METTL7B	1.6152	0.0751351	0.123808
CNST	1.61479	0.000360147	0.00119844
MLST8	1.61464	9.65195e-05	0.000368962
SUPT6H	1.61432	7.74577e-07	5.08322e-06
MAOB	1.61392	0.17528	0.251875
SAGE1	1.61392	0.0077024	0.017542
CIAPIN1	1.61234	1.05567e-06	6.66388e-06
TMEM17	1.61043	1.31146e-05	6.3402e-05
SFXN1	1.61017	0.0101076	0.0221454
TIMMDC1	1.60871	3.23078e-06	1.82091e-05
YWHAZ	1.60862	1.29576e-06	7.99242e-06
RHBDD1	1.60811	6.81368e-08	5.77988e-07
SYT11	1.60425	0.0522915	0.091394
CRISPLD1	1.60412	0.0563497	0.0973779
THOC5	1.60296	0.000260603	0.000898468
SSR1	1.60273	3.18005e-07	2.30086e-06
MCM3	1.60269	0.000366805	0.00121865
TRAF2	1.60113	0.000219795	0.00077145
ZNF267	1.60089	1.25343e-05	6.0987e-05
CDC23	1.599	2.38419e-07	1.77099e-06
CAD	1.59888	0.000254156	0.000879321
MASTL	1.59883	0.00010476	0.000397374
SETD9	1.59838	0.000102965	0.000391453
PDHB	1.59793	6.36803e-10	8.59761e-09
URB2	1.59758	1.42019e-05	6.78769e-05
RAB8A	1.59734	2.0196e-07	1.5273e-06
HIST1H2BK	1.59493	0.0384158	0.0700173
DHX9	1.59428	6.07394e-12	1.28451e-10
JRKL	1.5939	4.96568e-05	0.000204143
RRP8	1.59333	1.18148e-08	1.19491e-07
TPSD1	1.59305	3.69631e-05	0.000157775
ANGPTL4	1.59246	0.11134	0.172229
ATG7	1.59242	1.41884e-08	1.40357e-07
ZNFX1	1.59173	8.60764e-06	4.36197e-05
BCAT2	1.59146	0.00142338	0.00400105
ZNF160	1.59107	9.08076e-06	4.58091e-05
ANP32E	1.59039	1.11758e-05	5.50013e-05
C17orf80	1.59004	4.43663e-06	2.4057e-05
NHLRC3	1.58939	0.000342532	0.00114529
MTRF1	1.58885	3.40539e-05	0.000147273
FANCA	1.5885	0.00023201	0.000810072
CNTN6	1.58804	0.0125515	0.0267466
TBK1	1.58722	2.31772e-06	1.35122e-05
SSR2	1.58716	9.56882e-05	0.000366203
UROD	1.58475	1.20466e-05	5.89226e-05
MOSPD1	1.58328	0.000585029	0.0018306
C5orf15	1.5829	0.000129098	0.000477564
GCDH	1.5828	7.20561e-06	3.71679e-05
BHLHE40	1.58245	0.00435234	0.010666
POLR3A	1.5824	3.43999e-07	2.46653e-06
KLHL20	1.58238	4.50162e-06	2.43778e-05
TSR2	1.58219	5.62499e-06	2.98714e-05
NPL	1.58167	0.00609965	0.0143247
FAM64A	1.58028	0.00672361	0.0155866
RIOK2	1.57882	2.02438e-07	1.53022e-06
GGCX	1.57796	3.12358e-06	1.76584e-05
COL15A1	1.5779	0.0513745	0.090017
ZNF408	1.57771	9.18531e-05	0.000353304
SERPINB6	1.5756	0.00833019	0.01878
DHX15	1.57559	1.12449e-08	1.14402e-07
AMBRA1	1.57379	7.04003e-05	0.00027834
BEX3	1.57293	0.0076768	0.0174956
ITGB1	1.57077	0.00592506	0.0139992
EXOC2	1.57029	1.59636e-06	9.648e-06
APBB1	1.57006	0.0116539	0.02508
MDGA2	1.56866	0.00390295	0.00969716
ZNF350	1.56852	1.3874e-07	1.09629e-06
DNASE1L1	1.56814	0.00147654	0.00413312
FAR2	1.56756	0.0260491	0.0502799
FAF2	1.56718	1.00175e-09	1.28803e-08
NTMT1	1.56648	0.000568479	0.00178864
CANX	1.56563	1.32535e-05	6.38918e-05
DNAJA3	1.56544	1.3655e-08	1.35883e-07
SLC33A1	1.56463	1.44324e-05	6.89395e-05
TUBGCP4	1.56396	4.18806e-07	2.93375e-06
ZNF766	1.56371	1.55518e-10	2.34159e-09
DAXX	1.56328	5.20804e-06	2.7825e-05
HJURP	1.56191	0.00165782	0.00457397
TXNL4B	1.5619	2.58952e-06	1.49629e-05
EDC3	1.56019	6.51541e-07	4.35785e-06
ZNF438	1.55977	0.00024372	0.000847246
NUF2	1.55924	0.00582721	0.0137914
ZNF433	1.55827	1.659e-05	7.78885e-05
PLEKHA4	1.55768	0.0282547	0.0538891
RNASEH2A	1.5576	0.00158807	0.00440698
RFC4	1.55723	1.38474e-05	6.63723e-05
KARS	1.55676	1.18728e-07	9.53614e-07
CTC1	1.55675	1.93553e-06	1.14599e-05
FKBP9	1.55623	0.0037912	0.00946696
ERAL1	1.55536	6.9245e-05	0.000274421
GPR146	1.55382	6.47243e-05	0.000258749
COL9A1	1.55344	0.137427	0.205166
TRIT1	1.55251	2.12266e-07	1.59586e-06
KIF24	1.55209	8.57482e-07	5.54678e-06
HERC2	1.55201	5.90221e-05	0.000238081
TNFAIP6	1.5509	0.0602774	0.102995
ZFYVE27	1.55009	4.29792e-05	0.000180144
ARHGAP1	1.54894	0.000204783	0.000723006
PEPD	1.54843	0.00139915	0.00394024
PSMC2	1.54782	7.07549e-07	4.69678e-06
NAXD	1.54747	1.77299e-05	8.24077e-05
ZNF765	1.54741	5.35851e-09	5.76816e-08
MSTO1	1.54629	2.01325e-05	9.24702e-05
FTSJ3	1.54626	3.07702e-05	0.000135275
SNRNP200	1.54558	1.23306e-06	7.64518e-06
TSSC4	1.54493	0.000111263	0.000418907
TRPV2	1.54249	0.0986116	0.155798
CYCS	1.54193	4.67918e-05	0.000193864
WDR53	1.54143	5.22745e-08	4.55441e-07
MAOA	1.54082	0.0222276	0.0438242
RNF14	1.54078	3.75747e-05	0.000160262
ZNF616	1.53935	6.00503e-08	5.15933e-07
HIF1AN	1.53852	8.7512e-05	0.000338161
TNFSF4	1.53852	0.0125302	0.0267081
UBA3	1.53784	1.23863e-05	6.03546e-05
CCT3	1.5373	2.75365e-05	0.00012241
CCNG1	1.53631	0.00431561	0.010593
RNF175	1.5359	0.119405	0.182394
ATF6	1.53568	6.05704e-08	5.20135e-07
USP4	1.53554	1.00611e-08	1.03253e-07
GPKOW	1.5346	2.72531e-08	2.53554e-07
ZBTB49	1.53401	3.6059e-08	3.26228e-07
UBOX5	1.53335	3.77481e-05	0.000160838
XRCC4	1.53247	0.000223176	0.000781842
LCMT1	1.53189	1.82749e-07	1.39777e-06
PCDHGA12	1.53149	0.251936	0.339131
UCP2	1.53049	0.0317903	0.0597784
ZNF627	1.5303	5.10515e-06	2.73189e-05
PITRM1	1.53012	0.00186069	0.0050751
ZNF501	1.52992	0.000256102	0.000884592
ZNF615	1.52972	6.8021e-06	3.52966e-05
HSPA9	1.52949	5.62802e-06	2.9878e-05
NUP85	1.52901	5.13341e-07	3.51357e-06
NOL6	1.52841	0.000137357	0.000504881
WBP2	1.52828	0.00293005	0.0075592
MRPL47	1.52818	7.58158e-06	3.88913e-05
MED18	1.52815	2.08324e-07	1.56763e-06
PSPH	1.52675	0.000500054	0.00159849
ENOX2	1.52672	0.000122739	0.000456666
RBM23	1.5259	1.2131e-06	7.53539e-06
NXT2	1.52584	0.00938236	0.0207796
MCFD2	1.52413	1.37009e-05	6.58455e-05
BCL2A1	1.52393	0.19363	0.273244
SCD	1.52384	0.023602	0.0461447
TBC1D19	1.52291	7.5325e-07	4.95687e-06
PRPF6	1.52071	0.000115681	0.000432989
GLUL	1.52	0.0237036	0.0463163
TCTN1	1.51951	0.0022417	0.00598727
SV2A	1.51934	0.187871	0.266579
LSG1	1.51923	7.79825e-09	8.15307e-08
SKP2	1.51903	0.000863382	0.00257353
SERPINB9	1.51706	0.10816	0.168354
NCAPD3	1.51668	2.1585e-05	9.83318e-05
PEX11B	1.51645	8.47975e-06	4.30107e-05
ARL2BP	1.5136	0.000477274	0.00153358
SEC22B	1.5119	0.00045532	0.00147323
IGSF8	1.51126	0.0316599	0.0595532
DLX5	1.5107	0.0275808	0.0528164
MAN2B2	1.50823	0.001199	0.00344442
FBXO3	1.508	5.26153e-06	2.80749e-05
POSTN	1.50767	0.228884	0.313141
ERO1A	1.50717	0.000319153	0.00107528
SHQ1	1.50707	2.81692e-08	2.60916e-07
PSMD6	1.50659	6.03058e-06	3.17132e-05
PIR	1.50621	0.159358	0.232188
KIF18A	1.50514	0.000581931	0.00182406
ARHGAP6	1.50496	0.0408623	0.0738888
AZI2	1.50457	1.70394e-05	7.96265e-05
DCUN1D1	1.50311	7.18511e-07	4.75822e-06
SLC35F6	1.50294	0.000769245	0.0023293
NREP	1.50281	0.0903018	0.144746
URGCP	1.50277	2.62908e-06	1.516e-05
UBE3B	1.50215	9.5763e-07	6.10954e-06
BZW2	1.50205	0.00388928	0.00966858
ARMCX5	1.50201	0.00115182	0.00332487
CYFIP1	1.50142	2.99235e-07	2.17635e-06
TCP1	1.50063	8.67107e-05	0.000335297
VPS72	1.49927	5.24579e-05	0.000214342
TTYH2	1.49924	0.104564	0.163758
NARS2	1.49853	0.0161415	0.033288
PDSS2	1.49835	2.22717e-06	1.30449e-05
MCTP1	1.49705	0.0181339	0.0368448
CHL1	1.49533	0.228096	0.31219
RFC5	1.49428	4.59e-06	2.48003e-05
IFT22	1.49423	0.000601897	0.00187632
APH1A	1.49338	0.0001695	0.00060963
COPS7A	1.49192	4.87698e-05	0.000201139
GHITM	1.4919	3.82156e-07	2.70419e-06
SEC31A	1.49163	3.2025e-07	2.3151e-06
BCL9	1.49153	0.000123576	0.000459372
FANCG	1.49121	0.002242	0.00598727
DET1	1.49093	6.9582e-05	0.000275626
ZNF439	1.49065	0.0230485	0.0452158
PARS2	1.48924	2.26682e-05	0.000102624
GCN1	1.4889	7.45384e-06	3.83183e-05
TSTD2	1.48881	1.31693e-05	6.36197e-05
FOXL2NB	1.48856	0.00118851	0.003419
PRSS35	1.48856	0.0227121	0.0446448
MECR	1.48618	1.34286e-05	6.46985e-05
GNE	1.48552	0.000356545	0.00118787
ANKRD42	1.48454	1.93671e-06	1.14599e-05
ANKZF1	1.48446	6.22538e-07	4.18393e-06
DCP1B	1.48402	2.07817e-06	1.22278e-05
AMN1	1.484	7.31522e-05	0.000288131
NDC80	1.48369	0.00134635	0.0038108
ERCC1	1.48244	0.000405516	0.00133192
SNX17	1.48232	1.13801e-05	5.58421e-05
UTP14A	1.48168	6.35575e-06	3.32247e-05
EXT2	1.48167	0.000186093	0.000662757
TFB1M	1.4812	0.00098021	0.00288526
ERP44	1.48007	7.61325e-06	3.90418e-05
LARS	1.47991	2.4699e-05	0.000110887
NFYC	1.47721	1.48831e-06	9.0996e-06
WDR55	1.47711	1.03842e-05	5.16688e-05
OSTC	1.4771	1.78029e-05	8.26322e-05
AASDHPPT	1.47663	6.42596e-05	0.000256977
FGF11	1.4765	0.00454324	0.0110641
VTI1A	1.47601	9.48777e-09	9.77287e-08
MR1	1.47547	0.0062886	0.0147168
RUVBL2	1.47515	0.000992602	0.00291661
MED8	1.47508	2.39542e-06	1.39134e-05
POLR2A	1.47463	0.000522462	0.00166092
DHRS3	1.4737	0.06699	0.112477
ATP6V0D2	1.47362	0.12559	0.190451
RABEPK	1.47242	1.45102e-05	6.9212e-05
DYNLT3	1.47238	0.153356	0.225248
SLC11A2	1.47158	6.87568e-05	0.000272615
ZNF30	1.47156	2.45623e-05	0.000110362
MPPE1	1.4704	8.20168e-07	5.33428e-06
BAK1	1.46898	0.00022367	0.000783407
BBS1	1.46896	0.000396816	0.00130694
CENPI	1.46879	4.91168e-05	0.000202221
ZNF544	1.46875	0.00796738	0.0180667
PSMD13	1.46698	1.35814e-06	8.3464e-06
GRPEL2	1.46676	7.05345e-05	0.000278805
NANP	1.46587	1.43995e-05	6.88016e-05
METTL2B	1.46584	3.94675e-06	2.16676e-05
PDE4C	1.46483	8.09794e-05	0.000315029
SLC18B1	1.46474	0.106345	0.166055
PAAF1	1.46471	0.000382858	0.00126545
LINGO2	1.46439	0.0185617	0.0375726
SGSM3	1.46422	0.00565269	0.0134234
BCKDHA	1.46393	0.000237845	0.000828889
SLC35A4	1.4636	0.00018325	0.000654022
ALG8	1.46322	0.0185895	0.0376062
IFT52	1.46282	2.54929e-06	1.4743e-05
IER3	1.46247	0.225277	0.308856
CMSS1	1.46111	7.11647e-07	4.72211e-06
HADHA	1.46012	5.79624e-05	0.000234315
AK4	1.46011	0.0386583	0.0704211
MRPS7	1.45813	4.10963e-05	0.000173201
TMEM255B	1.4576	0.000228716	0.000799072
PRKAR1A	1.45747	0.00687786	0.0159001
ALDH1A3	1.45737	0.289246	0.37955
TTC17	1.45735	6.95567e-08	5.88789e-07
STKLD1	1.45724	1.88226e-07	1.43577e-06
C6orf58	1.45527	2.58406e-11	4.67252e-10
RAD51	1.45425	0.00109096	0.0031733
GOLGA7	1.45423	3.08595e-05	0.000135526
NIT1	1.4537	0.000129636	0.000479279
SGTA	1.45293	3.22706e-05	0.000140691
ZNF18	1.45186	4.11043e-06	2.24704e-05
BYSL	1.45137	0.000490771	0.00157272
P3H2	1.44974	0.203465	0.284532
H1F0	1.44957	0.0373176	0.0683584
POLD3	1.44927	2.7942e-06	1.60293e-05
RPE	1.44864	7.77454e-06	3.97592e-05
PIP5K1B	1.44805	0.0282557	0.0538891
PRNP	1.44776	0.0228651	0.0448876
LRRC34	1.44712	0.0115735	0.0249391
PRMT7	1.44674	0.000465968	0.00150228
MYO1E	1.44671	0.00301135	0.00774149
THADA	1.44636	3.40692e-10	4.79318e-09
PSMB7	1.44601	0.000551162	0.00174123
PFKFB2	1.4452	0.0154376	0.032016
SLC39A14	1.4448	0.00335122	0.00850155
FOCAD	1.44349	0.00296714	0.00763839
OBP2A	1.44232	0.000265921	0.000915106
SLC22A18AS	1.442	0.048591	0.0856693
B4GALT3	1.44122	0.000155944	0.000565985
RABL3	1.43961	1.68207e-05	7.88169e-05
HEXA	1.43955	0.00410271	0.0101254
SEMA6D	1.43899	0.072791	0.120631
GDAP1	1.43864	0.00662848	0.0154045
AIFM2	1.43511	0.0123982	0.0264696
FAM212B	1.43431	0.0115367	0.0248774
DHODH	1.43413	1.13921e-06	7.13737e-06
ARHGEF39	1.43393	0.000199209	0.000705412
ICOS	1.43333	1.0942e-05	5.39936e-05
TWNK	1.43327	0.000537506	0.00170259
HLTF	1.43262	0.00114346	0.00330303
RNGTT	1.43244	2.01145e-05	9.24128e-05
PDHX	1.43198	1.4491e-06	8.87607e-06
TMEM184C	1.43162	8.55246e-08	7.08245e-07
ELOVL2	1.43154	0.239252	0.324556
HMCN1	1.4308	0.106539	0.16628
NUFIP1	1.42925	8.87992e-06	4.48771e-05
CSPG4	1.42891	0.161939	0.235517
HAT1	1.4287	2.43239e-06	1.41086e-05
AIFM1	1.4262	0.00014911	0.00054378
PLEKHB2	1.42605	4.86168e-05	0.000200706
EFHC2	1.42549	3.51209e-05	0.000151125
CLIC1	1.42537	0.000146439	0.000534856
FKBP14	1.42499	0.00402943	0.009974
MTHFD1	1.424	1.05419e-05	5.22658e-05
ZSWIM3	1.42374	6.68302e-07	4.45644e-06
ZNF670	1.4231	0.00248099	0.00654811
F2R	1.42273	0.173737	0.249959
SUPT16H	1.42246	6.7729e-06	3.51854e-05
PUM1	1.42226	1.10926e-08	1.13007e-07
DOLPP1	1.42112	5.21319e-05	0.000213114
ZNF449	1.421	2.06015e-05	9.43754e-05
PRDX6	1.42065	5.29988e-05	0.000216235
ACY3	1.42009	0.00064482	0.00199198
GPS1	1.4198	0.000698117	0.00213494
NSG1	1.41965	0.299094	0.389813
TRMT10C	1.41956	2.00706e-05	9.22618e-05
CCNE2	1.41588	0.000752502	0.00228372
RAD23A	1.41507	4.24721e-05	0.000178287
NEU1	1.41425	0.00187982	0.00512144
LSM1	1.41371	1.77828e-05	8.25847e-05
GOLT1B	1.4132	0.000360641	0.00119936
PRIMPOL	1.41296	0.000117769	0.000439936
PKNOX2	1.41282	0.137533	0.205284
MAK16	1.41232	0.00158881	0.0044083
MAD2L1	1.41147	0.000916215	0.00272035
LDLRAD3	1.41118	0.000430913	0.00140376
SELL	1.41115	0.0334525	0.0622878
CCDC51	1.41114	4.25053e-05	0.000178382
DNAJC7	1.41067	1.00595e-06	6.38129e-06
TP53TG3D	1.40965	0.000108354	0.0004098
CASP3	1.4096	1.14279e-05	5.60273e-05
TCF19	1.40744	0.00395515	0.00980319
ZSCAN32	1.40679	3.39982e-08	3.0892e-07
DCPS	1.40613	0.00159513	0.00442364
SNAPC1	1.40404	0.000728928	0.00221942
MORN1	1.40304	2.22099e-07	1.66455e-06
CLSTN3	1.40229	0.0803086	0.131049
FKBP10	1.40224	0.0813289	0.132469
RELL1	1.39983	0.0376742	0.0688834
DPF2	1.39955	8.75091e-06	4.42519e-05
NELFCD	1.39927	1.77411e-05	8.24372e-05
ZSCAN21	1.39924	5.33043e-05	0.000217428
ZNF841	1.39872	0.000595997	0.00186029
COX20	1.39859	2.1622e-05	9.84467e-05
ST5	1.398	0.00541323	0.0129216
SNAI3	1.39793	6.86754e-07	4.56962e-06
SPC25	1.39724	0.00220856	0.00590834
AGTRAP	1.39723	0.00271595	0.00708112
BTD	1.39722	0.00277938	0.00722214
FCMR	1.39703	0.223717	0.307026
BBS9	1.39643	6.04973e-05	0.00024362
AMPD2	1.39545	0.00033267	0.00111611
PUDP	1.39487	0.00112787	0.00326305
SMIM3	1.39411	0.164205	0.238356
FANCB	1.39404	9.18318e-06	4.627e-05
OVOS2	1.39401	5.72529e-06	3.03366e-05
WNK4	1.39295	0.218497	0.30137
PLPP7	1.39198	0.0722839	0.119897
LOX	1.39098	0.0863064	0.139189
C14orf1	1.39064	0.00166896	0.00460168
LEPROTL1	1.39054	6.10934e-05	0.000245548
VPS39	1.39017	5.77445e-06	3.05487e-05
EIF2B3	1.38957	1.71226e-06	1.02846e-05
RHEBL1	1.38908	0.00437485	0.0107149
GSTZ1	1.38666	0.0106939	0.0232353
TPSB2	1.38629	0.0167152	0.0343189
PRRC1	1.38615	1.57815e-06	9.56151e-06
SLC25A12	1.3852	2.43039e-05	0.000109348
B3GALT1	1.38505	0.0657601	0.110745
AUNIP	1.38479	0.00382538	0.00953949
FGL2	1.38416	0.0943241	0.149971
POLR1E	1.38385	0.000251513	0.0008709
COG2	1.38263	3.698e-06	2.04971e-05
MITF	1.38256	0.109385	0.169802
CCDC82	1.38204	0.000785604	0.0023717
CDC26	1.38135	4.07206e-06	2.22897e-05
SAT1	1.38115	0.0351871	0.0649855
DUS2	1.38063	3.8986e-05	0.000165396
SLC47A1	1.38056	0.0418053	0.0753198
DRG1	1.37951	1.37409e-05	6.59945e-05
TBC1D23	1.37918	0.000214043	0.000753
MLIP	1.37884	0.0955215	0.151631
FBXL13	1.37658	2.96432e-06	1.68951e-05
FAT2	1.37649	0.0104612	0.0228067
NNT	1.37595	0.00852834	0.019157
ADGRG1	1.37589	0.165314	0.239738
ZNF274	1.37562	0.000271953	0.000932983
DHX40	1.37379	7.56108e-05	0.000296552
IQCC	1.3735	3.08567e-06	1.74677e-05
CLN8	1.37301	0.000431028	0.00140386
RALB	1.37282	2.17953e-06	1.27972e-05
VTA1	1.37237	1.11691e-05	5.49842e-05
SGCE	1.37169	0.104571	0.163758
TMEM101	1.3711	6.53413e-05	0.000260991
CMTM5	1.36913	0.289877	0.380241
MEOX2	1.36843	0.178735	0.256049
TMEM168	1.36824	0.000143938	0.00052664
SLC38A9	1.36789	4.18478e-05	0.000175931
TMEM106A	1.36739	0.0053913	0.0128818
ZIK1	1.3661	0.0146028	0.0305155
EEPD1	1.36603	0.00643121	0.0150085
TIPARP	1.36603	0.000150927	0.000549446
INSIG2	1.36481	0.000408194	0.00133861
COL25A1	1.36474	0.0285469	0.0543887
PRUNE1	1.36307	0.000392211	0.00129321
NOP2	1.36276	0.000741425	0.00225337
STRADA	1.36212	7.90167e-05	0.000308414
ENOX1	1.36177	0.00780181	0.0177418
SLC35A2	1.36075	1.95678e-05	9.00989e-05
PPID	1.36068	1.55341e-06	9.43555e-06
PLK4	1.35979	0.00114116	0.0032981
HOXA11	1.35852	0.109426	0.16985
FLAD1	1.35816	0.000325355	0.00109452
BMS1	1.3575	3.48564e-07	2.49179e-06
PSMB2	1.35734	2.17049e-05	9.86899e-05
SH2D1B	1.35721	6.57661e-05	0.000262374
LYRM9	1.35607	0.00735661	0.0168508
SMARCA1	1.3552	0.0416286	0.0750473
OSGIN1	1.35266	0.0655682	0.1105
NRM	1.35199	0.00874238	0.0195511
COG4	1.35033	1.70461e-05	7.96278e-05
NHSL1	1.34968	0.014533	0.0303923
NCEH1	1.34919	0.0150306	0.0312803
GTF3C5	1.34892	0.00068444	0.00210079
ADGRG6	1.3476	0.212677	0.29487
NDFIP2	1.34755	0.00562415	0.0133732
LEF1	1.34746	0.134468	0.201558
KCTD14	1.34574	0.155657	0.227887
NBAS	1.34565	1.04454e-05	5.19259e-05
TMEM9	1.34512	0.00199304	0.00539476
INIP	1.34485	5.3753e-05	0.000219098
ZWILCH	1.34477	0.000573216	0.00180138
ISG20L2	1.34441	0.000557817	0.0017596
CD177	1.34412	0.000278182	0.000951427
RAE1	1.34369	5.17595e-05	0.000211747
CS	1.34258	0.000272104	0.00093331
TLR2	1.34168	0.0475708	0.084101
MTERF1	1.34167	4.05682e-05	0.000171154
CHTF8	1.34079	7.97762e-05	0.000311144
EARS2	1.33996	2.8289e-05	0.000125323
FAM200A	1.33927	0.000111374	0.000419172
LIN28B	1.33904	0.0363847	0.0668838
SQLE	1.33896	0.0816138	0.132844
FARSB	1.33769	6.28623e-06	3.2923e-05
VPS41	1.33768	3.56735e-05	0.000152973
SERINC3	1.33749	0.000436425	0.00141868
CUL1	1.33715	0.00014812	0.000540638
FASTK	1.33658	0.011772	0.0253049
ITLN2	1.33615	0.0379534	0.0693333
ARMC9	1.3356	0.00086596	0.0025803
PSMC3IP	1.33457	0.000379288	0.00125434
C11orf58	1.33428	3.17107e-05	0.000138619
WDR62	1.33393	0.0051386	0.0123539
PIGC	1.33266	1.94173e-05	8.94802e-05
NPM2	1.33138	0.169524	0.244826
RLF	1.33117	0.00031787	0.00107183
ZNF257	1.33111	6.98216e-06	3.61379e-05
ZNF77	1.33075	1.04971e-05	5.21055e-05
ZNF485	1.33071	0.00268333	0.00700369
EOGT	1.33036	0.0110556	0.023934
PPP2R1A	1.32986	0.000106685	0.000404036
SLC41A3	1.32929	0.000252979	0.000875611
TMEM254	1.32899	3.08572e-05	0.000135526
MKS1	1.32845	5.29927e-05	0.000216235
PLD2	1.32765	0.00117673	0.00338918
TXK	1.32764	9.31833e-05	0.000357762
CDC25C	1.32735	0.0027638	0.00718921
TSN	1.32582	3.4527e-05	0.000149011
NHP2	1.32517	0.000691281	0.00211713
SLC25A15	1.32469	0.00145223	0.00407462
RDH11	1.3245	0.00018495	0.000659246
DAP3	1.32399	1.76832e-06	1.05944e-05
PDE4B	1.3232	0.106951	0.166825
CTNS	1.32255	0.00539229	0.0128824
CD70	1.32185	0.0288859	0.0549339
DIAPH3	1.32149	0.0104638	0.0228094
WDR77	1.32147	0.000132517	0.000488377
NCBP2	1.32066	9.12898e-06	4.60385e-05
DDIT3	1.32022	0.0191033	0.0384918
SPICE1	1.31972	4.5583e-05	0.000189491
LPCAT2	1.31931	0.0608436	0.103835
MRPL24	1.31898	0.00154373	0.00429749
TRO	1.31836	0.07991	0.130464
ZNF816	1.31823	0.00417921	0.010296
OCA2	1.318	0.446619	0.54044
EIF2D	1.31691	0.000372361	0.0012349
ADAM10	1.31665	0.00136923	0.00386703
UFSP2	1.31664	3.38673e-05	0.00014658
SLC17A5	1.31659	0.017233	0.0352541
C10orf107	1.31576	1.35724e-05	6.53352e-05
HK2	1.31565	0.0247694	0.0481346
HTATIP2	1.31565	0.124702	0.189396
ACTR1A	1.31472	0.000653714	0.00201684
FLNB	1.31452	0.011589	0.0249627
ARL13B	1.31419	0.000548662	0.00173465
AP4M1	1.31375	0.000137619	0.000505693
GTF3C2	1.31358	3.45787e-06	1.93133e-05
TTC30A	1.3133	0.000629846	0.00195221
ECHDC1	1.31164	0.00977254	0.0214951
PSMD5	1.31162	0.000693801	0.00212407
KBTBD6	1.31013	0.0009887	0.00290718
RTP4	1.31013	0.0788221	0.128839
AP1S1	1.30984	0.000297059	0.00100816
IL27RA	1.30916	0.117871	0.18038
CD96	1.30908	0.00235057	0.00624132
HSPA4L	1.30889	0.0170192	0.034868
C1orf109	1.30851	5.62153e-05	0.00022819
SIL1	1.30779	0.00953978	0.0210752
UQCC1	1.30766	1.0985e-05	5.41578e-05
PDIA5	1.30698	0.00961509	0.0212024
GRPEL1	1.30565	3.94066e-05	0.000166969
PQLC2	1.30531	0.00446275	0.0108998
CTNNB1	1.30522	0.00919877	0.0204271
DDR2	1.3052	0.071559	0.118872
WDR73	1.30476	1.49631e-05	7.10482e-05
FICD	1.30436	0.00105776	0.00308961
ZNF788	1.30413	0.00479101	0.0116201
RPF2	1.30345	0.000291391	0.000991333
TBC1D8B	1.3031	0.000918118	0.00272503
MGAM2	1.30271	0.052665	0.0919219
C1orf216	1.30269	0.00098941	0.00290825
PPP1R11	1.30233	0.00131494	0.00372881
P4HB	1.30221	0.0040673	0.0100529
ZNF280B	1.30217	0.0095164	0.0210291
ZNF658	1.30189	7.91315e-08	6.60535e-07
EIF1AD	1.30164	3.90833e-06	2.1499e-05
MRRF	1.30153	8.08146e-05	0.000314607
CNRIP1	1.3014	0.0597786	0.102331
SDC4	1.30134	0.028654	0.0545617
SUPT5H	1.30093	5.33362e-05	0.000217506
TARS	1.3006	0.000420449	0.00137342
ZFP37	1.30049	0.000176075	0.000631455
ILF2	1.30017	1.26063e-05	6.1284e-05
SLC7A11	1.30008	0.10114	0.159145
COX15	1.30006	1.36661e-05	6.5726e-05
PDCD4	1.29999	0.033379	0.0621801
IPO4	1.29949	0.00264944	0.00693039
IPO13	1.29855	0.00292316	0.00754376
TMEM241	1.29837	3.89128e-06	2.14193e-05
CHMP7	1.29822	5.1079e-05	0.000209321
RPS6KB2	1.29819	0.00329989	0.00840053
NPAT	1.29797	0.000530506	0.00168329
UBQLN4	1.29745	0.000839553	0.0025137
RNF6	1.29681	0.00253693	0.00667366
KCNK2	1.29678	0.0828107	0.134439
DGKG	1.29647	0.00441821	0.0108011
TOM1L1	1.29394	0.0109449	0.0237281
WDR5B	1.29383	0.000109067	0.000412031
FANCC	1.29348	1.64246e-05	7.72424e-05
ZDHHC5	1.29308	5.70774e-06	3.02628e-05
RAB5B	1.29287	0.00384522	0.00958327
MTHFD2	1.29271	0.0122939	0.0262781
GSTO1	1.29261	0.0344671	0.063857
NARS	1.29252	3.3221e-05	0.000144234
CHCHD3	1.29249	8.82009e-05	0.000340509
ZNF530	1.29232	2.59453e-05	0.000115984
PGAP2	1.29194	0.000463078	0.00149535
MTO1	1.29189	2.72996e-08	2.53714e-07
ERP29	1.29165	0.00129872	0.00368721
PIGU	1.29143	0.000205012	0.000723512
TRMT61B	1.29137	9.84995e-06	4.93175e-05
BEX2	1.29095	0.136434	0.203883
POLA2	1.29082	0.000828007	0.00248269
EREG	1.29062	0.0417118	0.075173
HMBOX1	1.2904	0.00132505	0.0037562
PAFAH2	1.29028	0.00012896	0.000477162
MPDU1	1.29017	0.00269706	0.00703516
SPATA18	1.28965	0.088111	0.141737
FAHD2A	1.28798	0.00229838	0.00612023
SMC1B	1.28755	0.00217842	0.00583891
IFIT5	1.2873	0.018561	0.0375726
ELAC1	1.28711	6.0289e-06	3.17132e-05
MRPL3	1.28673	4.91226e-06	2.63626e-05
MRPS22	1.28458	5.74815e-06	3.04481e-05
DDX19A	1.28434	8.39425e-06	4.26417e-05
YME1L1	1.28406	0.000135925	0.000499836
ZNF197	1.28402	0.0064295	0.0150066
EXOC4	1.2831	1.50839e-06	9.19545e-06
KLHL22	1.28297	0.0150793	0.0313629
IPO11	1.28282	7.45826e-05	0.000292962
ERCC3	1.28216	9.66358e-10	1.24925e-08
TKT	1.28198	0.0228427	0.0448489
PRRG1	1.28175	0.00161313	0.00446688
TSC1	1.28079	3.60885e-05	0.000154436
GNGT1	1.27996	1.68266e-05	7.88225e-05
THAP9	1.27986	1.9446e-05	8.95877e-05
KDM4A	1.27981	6.31846e-05	0.00025298
TAPBPL	1.27933	0.0142778	0.0298997
SCPEP1	1.27903	0.0288785	0.0549266
GAPVD1	1.27745	3.93464e-06	2.16224e-05
MAPK7	1.27518	0.00204112	0.0055142
SHTN1	1.27263	0.0655374	0.110459
CEP68	1.27232	3.1147e-06	1.76142e-05
LRRC59	1.27211	0.00206234	0.00556523
NUDT21	1.27196	7.23419e-05	0.000285275
MED24	1.27176	0.000793345	0.00239119
KLHL12	1.27133	4.80345e-06	2.58118e-05
SPTY2D1	1.27103	7.20107e-05	0.00028417
GK	1.27032	0.00746377	0.0170658
ZBTB33	1.26957	5.28346e-05	0.000215723
ACP6	1.26923	0.0228862	0.0449237
CUL9	1.2691	0.000363388	0.00120802
KIF4A	1.26899	0.00585457	0.0138503
EXD2	1.26864	3.04781e-05	0.000134062
CDK1	1.26842	0.00955183	0.0210907
COQ3	1.26817	0.00300781	0.00773357
TEN1	1.26802	0.00694513	0.0160356
ZNF521	1.26733	0.121224	0.184836
KBTBD2	1.26704	3.88745e-05	0.000165007
GSTT2B	1.26565	0.0927125	0.147756
HSPA2	1.26391	0.215621	0.298116
INTS2	1.26378	0.00043388	0.0014115
DDX41	1.26317	0.0010345	0.00302695
TOP2A	1.26316	0.0261638	0.0504516
FAM118B	1.26294	0.00011511	0.000431353
TOX4	1.26231	6.28876e-06	3.29259e-05
FUZ	1.26155	0.00403423	0.00998292
SNAP47	1.2615	1.22743e-05	5.99313e-05
FAM114A1	1.26145	0.127607	0.192917
ATP6V1C1	1.26139	0.00156545	0.00435028
LMAN1	1.26129	0.00318032	0.00812951
MSH2	1.26093	0.000144715	0.000528903
RAB36	1.26048	0.0715671	0.118873
MAGT1	1.25951	0.000208708	0.000735469
SLC25A17	1.25918	0.000117061	0.000437489
PEF1	1.25886	5.56251e-05	0.000226178
TMBIM1	1.25849	0.00503565	0.0121238
GPD2	1.25847	0.00217348	0.00583127
MAPK1IP1L	1.25812	6.10508e-06	3.20747e-05
PEMT	1.25804	0.0160609	0.0331441
SFXN2	1.25702	0.000217713	0.000764625
CHPF2	1.25635	0.00687772	0.0159001
MLF1	1.25631	0.00776939	0.0176753
CDK5	1.25594	0.00613871	0.0143962
VAMP3	1.25585	0.000262803	0.000905492
PHF23	1.25566	0.000616597	0.00191647
IGFBP5	1.25566	0.319907	0.411773
PI15	1.25516	0.276943	0.366568
GSKIP	1.2545	0.000463419	0.00149596
AP3B1	1.25431	1.24647e-05	6.06839e-05
C3orf38	1.25429	6.79602e-06	3.52946e-05
TRIM2	1.25324	0.0715233	0.118824
CHORDC1	1.2531	0.00137542	0.00388125
NPC1	1.25258	0.00967124	0.0213093
RNF13	1.25246	0.00159946	0.00443417
MRPS11	1.25207	0.000146065	0.000533605
SYPL1	1.25195	8.64319e-05	0.000334451
BSDC1	1.25107	3.8863e-05	0.000165
PTCHD4	1.25058	0.0698422	0.116408
SAMM50	1.25045	0.0271694	0.0521144
TMED1	1.25012	0.000387441	0.00127934
PRRX1	1.25006	0.221702	0.304717
ABCB4	1.24924	0.131283	0.197562
HMOX1	1.24873	0.076225	0.125332
IL1A	1.24681	0.00629551	0.0147308
SLC30A6	1.24658	1.87695e-05	8.66382e-05
CAMTA2	1.24571	0.00195441	0.00530564
DYNC1LI2	1.24534	0.00275365	0.00716822
TWF1	1.24493	0.00533914	0.01277
BRCA1	1.24484	0.00161156	0.00446327
CCAR2	1.24394	0.000702179	0.00214672
ODF3L1	1.24248	0.0341246	0.0633699
NEMP1	1.24224	0.00134467	0.00380668
ACPP	1.24181	0.10877	0.169051
KDR	1.24043	0.0167421	0.0343635
PLAC1	1.24015	0.00531223	0.0127221
KLHL24	1.2395	0.00267128	0.0069777
GINS2	1.23909	0.00826684	0.0186497
CCDC181	1.23894	0.0249451	0.0484197
TUBG1	1.23775	0.00814462	0.0184212
PDXDC1	1.23745	0.000280507	0.000958399
UBXN7	1.23684	6.89446e-06	3.57282e-05
GINS4	1.23602	0.000764652	0.00231681
TM9SF2	1.23519	0.000333109	0.00111719
MMAB	1.23513	0.00140569	0.00395625
TSG101	1.23417	1.75993e-05	8.18462e-05
CREB3L4	1.23383	0.00344584	0.00871251
SNX24	1.23266	0.0233679	0.0457619
MLH1	1.23252	6.80555e-05	0.000270412
TUBE1	1.23231	0.00100719	0.00295376
RRN3	1.23209	7.21566e-07	4.77467e-06
PISD	1.23026	0.000325143	0.00109414
ABCC10	1.22925	0.00194192	0.00527688
PIGA	1.2289	0.00784043	0.0178143
IFNAR1	1.22779	0.000235094	0.000819816
HSD17B4	1.22775	7.94828e-05	0.000310129
DIEXF	1.22771	3.57899e-05	0.000153393
ACTR8	1.22675	3.2592e-07	2.35101e-06
MINDY4	1.22658	0.0117334	0.0252349
ZNF227	1.22658	0.000164203	0.000592618
RRM2B	1.22638	0.0196666	0.0394322
SERGEF	1.22608	0.00163773	0.00452376
CC2D2A	1.22489	6.72348e-05	0.000267659
AGBL5	1.22389	0.000659461	0.00203307
SEL1L3	1.2237	0.199942	0.280755
HAX1	1.22366	0.00106968	0.00311899
OSCP1	1.22342	0.000484337	0.00155508
GAL3ST4	1.22273	0.0939725	0.149498
IGSF3	1.22244	0.0911523	0.145833
WDR89	1.22202	9.21285e-05	0.000354119
RAB7A	1.22115	0.000582067	0.00182406
ELP2	1.22103	0.000150375	0.000547675
TNC	1.22075	0.331802	0.424083
OLFML2A	1.22055	0.0833579	0.135163
UBAC2	1.22047	0.000131312	0.000484364
NRAS	1.22007	0.00336598	0.00853251
RNF216	1.21993	0.000225545	0.000789148
SENP1	1.2193	2.79883e-05	0.000124122
NFX1	1.21899	1.12756e-05	5.54272e-05
SAMD15	1.2186	0.000374926	0.00124292
EBNA1BP2	1.21829	9.28695e-05	0.00035671
TMEM53	1.21764	0.00381665	0.0095204
RFTN2	1.21746	0.124929	0.189689
DCAF13	1.21733	0.00407223	0.0100621
PNP	1.21727	0.0392561	0.071287
NONO	1.21679	1.20513e-06	7.49423e-06
SEMA3E	1.21673	0.119811	0.182898
EIF2B2	1.21655	8.50395e-05	0.000329673
ECT2	1.21651	0.00735048	0.0168437
PCOLCE	1.21609	0.336768	0.429019
SMIM20	1.2159	0.11716	0.179556
EXTL2	1.21469	0.00676541	0.0156683
ZNF701	1.21405	0.00064945	0.00200517
STRAP	1.21397	9.5158e-05	0.000364591
PCDHB11	1.21396	0.0854878	0.138008
ACOT9	1.21209	4.61305e-05	0.000191434
GARS	1.21057	0.00142076	0.00399505
POC5	1.21047	0.000377779	0.00125039
NECAP2	1.21039	9.14592e-06	4.611e-05
PRR4	1.20992	0.102769	0.161329
[truncated: 14,729 more rows]

## Sheet: CTC.vs.TCGA.Primary
Gene	Log2FoldChange	P value	FDR-adjust P value
MAGEC2	6.23928	1.13187e-05	5.02557e-05
F2RL2	5.77456	6.67046e-14	3.12903e-12
TF	5.75521	5.38665e-06	2.60417e-05
SPATS1	5.61006	3.90983e-11	8.24444e-10
LOXL3	5.55354	8.47806e-08	6.66091e-07
UCN2	5.38408	4.64905e-06	2.28851e-05
FCRLA	5.31051	1.90688e-06	1.04908e-05
PCDHGC3	5.12551	8.98747e-12	2.32319e-10
LPXN	4.94637	2.50677e-13	1.02514e-11
HMGCS1	4.87172	5.40397e-16	4.78822e-14
DCT	4.8566	0.000290321	0.000887546
ICAM1	4.84746	5.28762e-14	2.54013e-12
ITIH5	4.8072	3.32637e-05	0.00013003
FABP7	4.74917	9.57635e-05	0.00032945
IL1B	4.71796	1.7545e-09	2.18784e-08
CYTL1	4.54702	0.000116792	0.000392149
ANGPTL2	4.53302	4.27158e-10	6.41501e-09
CYP51A1	4.52914	3.06925e-15	2.23523e-13
CD70	4.42815	1.72083e-11	4.12715e-10
FADS2	4.40406	4.64548e-08	3.93054e-07
FDPS	4.34946	1.48953e-21	4.31938e-19
MAGEA1	4.28369	2.22298e-06	1.199e-05
CCDC86	4.26732	1.13058e-18	1.89807e-16
ACO2	4.24378	3.97259e-14	2.00503e-12
SLAMF9	4.21888	2.74327e-06	1.43922e-05
CD36	4.20059	8.13121e-05	0.000284958
IGF2BP3	4.19473	4.98987e-09	5.50369e-08
IL1RAPL1	4.19264	4.36635e-15	3.07757e-13
PAEP	4.19081	0.0176695	0.0335808
ACAT2	4.17949	1.59993e-14	9.55705e-13
APOBEC3B	4.17333	4.11196e-10	6.234e-09
SHCBP1	4.1678	1.67447e-14	9.92791e-13
C17orf53	4.159	3.8835e-15	2.7528e-13
TUBA1B	4.1183	5.06522e-16	4.53849e-14
IL24	4.09601	8.92829e-09	9.14562e-08
PDIA6	4.03071	4.42077e-16	4.02727e-14
NCAPG	3.9787	3.70215e-14	1.89857e-12
LDLR	3.94239	7.79968e-07	4.75342e-06
DHCR7	3.92486	7.16245e-08	5.76348e-07
QPCT	3.87661	8.87095e-06	4.05743e-05
KIFC1	3.85431	2.48131e-14	1.36936e-12
MAGEA10	3.84811	1.25743e-05	5.51407e-05
BECN1	3.82788	9.62103e-20	2.04594e-17
PAGE5	3.80997	0.000340168	0.00102191
MSN	3.79655	1.30959e-13	5.66515e-12
HMGCR	3.7878	6.83983e-18	9.82779e-16
PLK1	3.78394	1.76176e-11	4.20633e-10
M6PR	3.7657	3.51704e-15	2.50416e-13
SPP1	3.7524	0.00683277	0.0145924
SPAG5	3.74282	1.92377e-15	1.46805e-13
RACGAP1	3.73535	9.33514e-18	1.30602e-15
TK1	3.73343	7.13802e-12	1.91335e-10
SLC22A18AS	3.69066	2.43848e-07	1.6924e-06
BIRC5	3.67973	3.89138e-14	1.97655e-12
NQO1	3.6497	2.36643e-05	9.66016e-05
TMEM97	3.63588	2.72628e-15	2.01303e-13
FEN1	3.62973	1.30389e-15	1.06101e-13
SLC43A3	3.62476	2.32257e-11	5.36073e-10
EEF2KMT	3.62181	6.17412e-19	1.13185e-16
DDOST	3.60703	3.39955e-18	5.2134e-16
TYRP1	3.60636	0.043109	0.0724571
TUBA1C	3.60201	4.15987e-11	8.71824e-10
ARHGEF3	3.58191	2.20828e-14	1.24893e-12
CDCA5	3.58026	6.01286e-14	2.85525e-12
HSD17B12	3.57301	6.17885e-13	2.23626e-11
FAP	3.56446	4.54331e-08	3.85432e-07
PFKFB4	3.55854	3.48015e-07	2.32921e-06
RFC3	3.53666	7.96695e-16	6.75877e-14
NCAPG2	3.53586	6.58928e-15	4.43428e-13
SERPINB2	3.52648	1.57722e-05	6.74398e-05
PFKP	3.52228	1.65909e-06	9.29755e-06
RNF26	3.51804	4.99906e-14	2.44571e-12
PRMT5	3.51445	7.60035e-16	6.5171e-14
AGMO	3.5128	5.9222e-08	4.90666e-07
PHB	3.49416	1.20752e-18	1.98544e-16
RAD54L	3.46529	1.3325e-11	3.2847e-10
EME1	3.46361	3.25781e-15	2.3603e-13
STK26	3.45892	1.14219e-08	1.13429e-07
DNAJC14	3.4493	2.46533e-22	8.36587e-20
CDK4	3.44494	2.10084e-15	1.59554e-13
AIMP2	3.41994	4.17728e-17	4.89878e-15
SEC24C	3.41948	9.9806e-16	8.33406e-14
DDIAS	3.41722	2.8499e-12	8.70749e-11
KIF2C	3.40649	4.52378e-13	1.70971e-11
CCT5	3.40346	2.89958e-19	5.78067e-17
HYOU1	3.39759	5.71743e-11	1.14557e-09
AKR1B1	3.37308	1.39705e-08	1.35615e-07
PYCR1	3.36859	1.97117e-11	4.62327e-10
PLA2G4A	3.36766	3.19269e-05	0.000125512
EXO1	3.36378	4.39731e-13	1.66983e-11
ETFB	3.34885	6.07845e-08	5.01527e-07
NCAPH	3.30655	6.34952e-13	2.28082e-11
MAT2A	3.30606	5.91564e-19	1.09708e-16
GAPDH	3.2942	4.02671e-10	6.1339e-09
PBK	3.29209	1.49179e-08	1.43874e-07
CYP1A1	3.28815	3.64464e-07	2.42606e-06
GALM	3.28609	7.06146e-05	0.000251335
ASF1B	3.28569	4.6432e-09	5.16779e-08
CDC20	3.28497	6.31626e-10	9.05103e-09
EMC1	3.2811	2.4086e-17	3.02479e-15
COL19A1	3.27581	6.74978e-08	5.4757e-07
PMAIP1	3.26767	2.64076e-08	2.39986e-07
MUL1	3.25872	1.06627e-16	1.11154e-14
CDC6	3.25719	1.29568e-11	3.20384e-10
DTL	3.25631	2.54072e-13	1.03637e-11
GBA	3.24643	9.68093e-10	1.31517e-08
CYB561A3	3.23695	5.51773e-08	4.59755e-07
PGM1	3.23235	1.10557e-10	2.02211e-09
HS6ST2	3.21172	1.3338e-08	1.30029e-07
ORC1	3.20557	1.6794e-12	5.40015e-11
IDH3A	3.20436	2.9618e-16	2.86289e-14
SHC1	3.1941	3.03777e-11	6.6919e-10
NOC2L	3.1784	4.04843e-13	1.5634e-11
COPG1	3.17692	1.04361e-13	4.63637e-12
KRT27	3.16516	4.90147e-09	5.41751e-08
KBTBD4	3.1608	9.2742e-17	9.9942e-15
EFTUD2	3.16027	8.19576e-19	1.45238e-16
BORA	3.14733	4.50052e-16	4.0553e-14
MAGEA6	3.12376	0.0178658	0.0339217
FN1	3.12006	0.000260216	0.000803832
VPS52	3.11906	1.74466e-17	2.3188e-15
TMEM246	3.10865	2.76688e-05	0.000110877
RRM2	3.10849	7.79476e-11	1.50689e-09
CDC45	3.1077	1.24196e-10	2.24345e-09
KIF20A	3.10081	5.88603e-13	2.13841e-11
NSDHL	3.08531	2.60949e-15	1.93576e-13
ENO1	3.08496	2.25127e-09	2.74088e-08
CLPB	3.08466	5.12797e-12	1.43484e-10
THBS2	3.08261	0.000778445	0.00212048
KRT12	3.08024	4.36823e-12	1.24855e-10
DNAJC11	3.07659	7.11761e-15	4.71032e-13
SLC20A1	3.07454	5.83969e-09	6.33155e-08
LPL	3.05624	0.00119834	0.00311733
SPTLC1	3.05611	4.0108e-16	3.71908e-14
PLOD1	3.05559	2.38331e-09	2.87312e-08
MCM2	3.05483	3.77256e-11	8.01178e-10
SUMF2	3.0482	1.45318e-10	2.55532e-09
MAGEC1	3.04642	0.00374532	0.00852127
CT55	3.04565	4.31355e-07	2.81377e-06
PLAT	3.04208	0.000165707	0.000533479
CPVL	3.03107	0.000159892	0.000517394
RNF40	3.02578	1.26208e-16	1.2821e-14
IL1RAP	3.02174	1.07774e-06	6.34044e-06
DFNA5	3.00791	1.75856e-05	7.42384e-05
TNFRSF10B	2.99905	3.4764e-06	1.77311e-05
SPAG4	2.99762	2.62199e-07	1.80796e-06
CNOT1	2.99593	2.56368e-14	1.40993e-12
PC	2.99447	3.86382e-10	5.90269e-09
TPX2	2.99196	2.18161e-11	5.06469e-10
MRPS18A	2.99043	1.06134e-11	2.69114e-10
ACTL6A	2.98351	7.21483e-21	1.85596e-18
RECQL	2.97962	5.31396e-10	7.80408e-09
FGL2	2.97955	0.00181803	0.0045186
GPI	2.97945	2.97332e-11	6.57719e-10
PGAM1	2.97691	1.53012e-11	3.71329e-10
C8orf48	2.96722	1.42716e-08	1.38034e-07
TFRC	2.96716	2.27465e-06	1.22311e-05
SKA3	2.963	2.7271e-12	8.34826e-11
AARS	2.95371	1.57262e-11	3.80026e-10
CDCA8	2.9433	1.33654e-10	2.39242e-09
RP11-398C13.8	2.93016	8.0663e-11	1.55562e-09
SLC16A1	2.92971	8.14102e-12	2.15325e-10
BUB1B	2.92764	3.23247e-11	7.043e-10
KIF18B	2.91675	3.90648e-12	1.13694e-10
FANCB	2.91481	4.11762e-12	1.19187e-10
C19orf57	2.91374	5.16653e-10	7.59456e-09
MCM5	2.9038	4.57364e-11	9.47337e-10
ABCB6	2.89143	5.1268e-12	1.43484e-10
NUDT22	2.88897	1.03148e-10	1.90187e-09
FOXM1	2.8882	1.18526e-08	1.17487e-07
EPHA3	2.88728	2.38809e-06	1.27768e-05
PCDHGA12	2.88661	0.00924593	0.0190186
HMGN4	2.88321	7.50939e-15	4.90849e-13
ITGA4	2.87528	8.09192e-05	0.000283956
GPC6	2.86671	4.88281e-07	3.1389e-06
SLC2A6	2.86651	2.05717e-06	1.12132e-05
MCAM	2.85491	0.00107115	0.0028233
C1GALT1C1L	2.84856	3.43999e-07	2.3062e-06
ACLY	2.84172	1.7721e-16	1.76645e-14
CCNB1	2.83996	1.07869e-12	3.66043e-11
IARS	2.83973	3.10465e-14	1.63558e-12
AURKA	2.83851	2.86456e-10	4.51898e-09
PNPO	2.83338	1.39743e-12	4.6144e-11
NCR3LG1	2.83039	4.09253e-10	6.21045e-09
ADGRE5	2.82702	1.97514e-09	2.43255e-08
HJURP	2.80938	1.91027e-10	3.20704e-09
SSX1	2.80615	0.000452097	0.00131195
PIGS	2.79841	5.96552e-12	1.6262e-10
SLC39A7	2.78675	1.32945e-10	2.38241e-09
FANCI	2.77532	1.44493e-10	2.54361e-09
RP11-27I1.4	2.77078	1.38475e-10	2.45665e-09
P3H2	2.76476	0.000379037	0.00112097
MEOX2	2.76429	2.10071e-10	3.48639e-09
EIF3L	2.76275	1.70979e-06	9.53475e-06
NUP188	2.76265	2.03202e-13	8.43978e-12
USP11	2.75663	7.2847e-12	1.94613e-10
SEMA3A	2.75503	2.6064e-05	0.000105212
CALR	2.75489	7.96036e-10	1.10592e-08
COPA	2.75194	6.15714e-15	4.19659e-13
MILR1	2.74954	1.22175e-09	1.59457e-08
FAM64A	2.73419	2.91722e-07	1.99172e-06
SKA1	2.73352	3.29723e-12	9.82945e-11
PARP4	2.73301	9.02638e-11	1.70571e-09
TFIP11	2.73224	3.40114e-12	1.00827e-10
RFT1	2.72434	4.32422e-16	3.98653e-14
BUB1	2.71846	5.67545e-10	8.25139e-09
PDHA1	2.71706	1.09746e-18	1.86207e-16
PPIB	2.71449	3.67738e-11	7.83633e-10
CERS2	2.69541	1.62731e-12	5.2752e-11
RAB36	2.69507	1.04786e-06	6.18517e-06
SNAI1	2.6944	1.35186e-05	5.88933e-05
HSPA5	2.69077	2.3064e-14	1.2907e-12
ADAM17	2.68958	3.58465e-12	1.05288e-10
DEPDC1	2.68737	5.89767e-08	4.89142e-07
C1orf112	2.68491	9.40713e-15	6.00137e-13
TBC1D4	2.68348	1.21065e-05	5.33389e-05
GANAB	2.67255	1.15728e-13	5.09876e-12
BIN3	2.6718	1.25353e-07	9.44383e-07
RPN1	2.66717	1.60305e-13	6.87288e-12
STARD4	2.66283	5.1231e-07	3.28255e-06
NUBP1	2.63965	2.7693e-14	1.5023e-12
RFC5	2.63692	8.17186e-15	5.27664e-13
PLIN3	2.6364	3.57992e-09	4.10468e-08
SPC25	2.63324	1.03291e-09	1.38677e-08
ACP5	2.63104	2.66727e-05	0.000107507
FAM53C	2.62208	1.10422e-11	2.78755e-10
HEATR1	2.61435	3.50754e-11	7.53932e-10
C6orf223	2.61378	4.03909e-10	6.14689e-09
MAD2L1	2.61183	3.95341e-10	6.02801e-09
CENPM	2.60325	6.17519e-07	3.87443e-06
ZNF473	2.59878	1.5197e-15	1.20586e-13
SAAL1	2.59642	3.7942e-14	1.93954e-12
MASTL	2.59308	1.49833e-10	2.61454e-09
SCML1	2.59159	3.63179e-05	0.000139776
AURKB	2.59021	1.13409e-06	6.62307e-06
KIF4A	2.58619	2.6272e-09	3.13163e-08
TBXAS1	2.58389	3.12235e-07	2.10921e-06
PYROXD2	2.58375	0.000288464	0.000882378
COPB2	2.58259	1.74797e-15	1.34678e-13
FMN2	2.57838	3.03438e-05	0.000119969
PPP1CA	2.57145	1.36068e-09	1.75154e-08
KCTD11	2.57067	3.49788e-06	1.7835e-05
TUBB4B	2.56847	2.73665e-08	2.47396e-07
STIP1	2.56806	4.1871e-14	2.1e-12
KPNA2	2.5674	1.57595e-09	1.98756e-08
ATG101	2.56738	1.08856e-09	1.45244e-08
MCM3	2.55984	3.42217e-12	1.01146e-10
CLP1	2.55847	1.05584e-16	1.11154e-14
TMEM231	2.5583	8.52796e-13	2.98928e-11
WDR3	2.55814	1.88527e-14	1.08549e-12
ACOT8	2.55736	2.17463e-12	6.76085e-11
SUV39H1	2.55151	1.56782e-11	3.79441e-10
MCM7	2.54989	1.03125e-09	1.38677e-08
BOLA2	2.54917	1.8387e-14	1.07027e-12
PKM	2.54502	3.4848e-08	3.0639e-07
HOXD13	2.52984	0.00532637	0.0116706
SLC12A8	2.52898	2.06149e-10	3.42844e-09
PGK1	2.52768	4.70663e-12	1.3366e-10
STT3A	2.52211	3.124e-10	4.86912e-09
ARSE	2.51498	1.48537e-06	8.41267e-06
WDR74	2.50949	9.77852e-12	2.49932e-10
SEC61A1	2.5084	8.59233e-11	1.63336e-09
TOP2A	2.50805	1.08843e-07	8.3338e-07
MSMO1	2.5057	6.53246e-09	6.95967e-08
SH3TC2	2.50039	9.83127e-08	7.619e-07
GNGT1	2.49601	5.96167e-15	4.0808e-13
TMEM177	2.49517	5.63843e-09	6.12584e-08
CALU	2.49293	2.44861e-08	2.24571e-07
NR0B1	2.49202	1.09747e-05	4.88924e-05
CKS1B	2.49097	1.02331e-12	3.50984e-11
AUNIP	2.48968	2.33515e-09	2.8236e-08
LDHA	2.48861	8.1566e-09	8.44738e-08
NDC80	2.48529	1.13251e-09	1.49896e-08
RCC1	2.48421	9.33799e-11	1.75728e-09
IDI1	2.48286	1.64458e-09	2.0653e-08
KCNE4	2.48145	0.000134897	0.00044581
PTGS2	2.47745	3.45182e-05	0.000134308
DOLK	2.46995	8.93789e-11	1.69145e-09
FAM162A	2.46936	1.05101e-08	1.05491e-07
KIAA1524	2.46833	1.04686e-07	8.05182e-07
PES1	2.46813	3.53407e-09	4.05795e-08
SND1	2.46666	1.03588e-09	1.38951e-08
ABCF2	2.46568	7.65282e-13	2.70631e-11
G6PC3	2.46069	2.60551e-08	2.37459e-07
SAE1	2.45938	6.25529e-15	4.24534e-13
ALDOA	2.45778	1.68157e-08	1.60403e-07
CLCC1	2.45671	3.96361e-13	1.53809e-11
ITLN2	2.4559	1.45518e-06	8.2652e-06
THTPA	2.45342	8.53898e-09	8.792e-08
FNTB	2.44779	6.12136e-08	5.04024e-07
LCN1	2.44626	2.95868e-23	1.12352e-20
TTK	2.44585	2.48524e-09	2.98248e-08
RNASEH2A	2.44322	3.68969e-09	4.20335e-08
ATP5B	2.43971	1.02639e-10	1.89467e-09
PRR11	2.4352	2.85951e-07	1.95484e-06
GOT1	2.43505	2.39578e-09	2.88597e-08
ABCF3	2.43163	1.08627e-10	1.98908e-09
ZNF695	2.43131	1.68676e-14	9.96377e-13
ZNF257	2.42709	1.06439e-12	3.62735e-11
NCSTN	2.42502	1.04434e-12	3.5743e-11
PSMD2	2.42203	1.05662e-08	1.05988e-07
TOMM34	2.41984	2.49318e-11	5.66786e-10
STC2	2.41852	3.39121e-05	0.000132144
TAF6	2.41847	1.24735e-11	3.09876e-10
SLC24A5	2.4158	0.00175404	0.00437866
GPNMB	2.41	1.30633e-08	1.27742e-07
ECE1	2.40944	2.11354e-05	8.72609e-05
TM9SF4	2.40617	5.35079e-12	1.48417e-10
GAGE12H	2.40174	1.23067e-12	4.10628e-11
MCM10	2.39989	7.11439e-11	1.39053e-09
TIMELESS	2.39736	6.20868e-12	1.68692e-10
PAK1	2.39641	5.0179e-06	2.44742e-05
TMEM173	2.39579	6.87504e-07	4.25991e-06
PLAUR	2.39532	2.11631e-05	8.73526e-05
C10orf90	2.39488	3.27262e-05	0.000128243
ZNF521	2.39193	8.01373e-05	0.00028146
KIF15	2.39175	7.63916e-08	6.09795e-07
RRM1	2.39115	9.06849e-12	2.33657e-10
FCGR2A	2.39073	9.43036e-06	4.28382e-05
EXOSC2	2.3907	2.67627e-17	3.31198e-15
MAN1B1	2.39006	1.74943e-11	4.18316e-10
DPP3	2.38652	1.08687e-08	1.08544e-07
ZFP82	2.38609	1.40447e-09	1.79758e-08
TPI1	2.38568	6.45477e-09	6.8907e-08
PSME3	2.38457	5.43067e-13	1.99373e-11
TYR	2.38343	0.00142856	0.00363674
RBBP4	2.38278	1.627e-14	9.68245e-13
YARS	2.38173	9.60337e-11	1.80023e-09
LASP1	2.37949	2.82817e-11	6.30861e-10
CCNE2	2.3792	5.86802e-07	3.69807e-06
PSMC3IP	2.37655	2.64254e-09	3.14522e-08
SKP2	2.37496	1.38866e-08	1.34882e-07
MAGEA3	2.37455	0.08781	0.133672
KYAT1	2.37361	3.03693e-09	3.55102e-08
TSR1	2.37266	1.06834e-13	4.73304e-12
LGALS12	2.37248	2.43253e-05	9.9173e-05
ZP3	2.37212	4.94875e-06	2.4159e-05
ZDHHC4	2.37172	8.92095e-14	4.00789e-12
KIF18A	2.37043	8.86946e-09	9.09704e-08
GNG2	2.37011	0.00141237	0.00360318
CENPN	2.36975	1.03182e-11	2.62463e-10
RXRG	2.36964	0.06639	0.105243
PABPC5	2.36115	1.11579e-07	8.52498e-07
GFM2	2.36047	3.05603e-11	6.72285e-10
C19orf48	2.35684	1.17837e-07	8.92817e-07
BATF2	2.35677	6.6938e-05	0.000239532
DYNLT3	2.35591	0.000881726	0.00236944
STK32B	2.35274	6.54998e-05	0.00023486
FBXW9	2.35249	1.24574e-07	9.40291e-07
ESPL1	2.35213	1.42081e-08	1.37586e-07
ZNF468	2.35103	3.1377e-10	4.88226e-09
HARS	2.35045	8.38277e-11	1.60116e-09
MMP8	2.34748	0.0175437	0.0333936
ABHD2	2.34741	3.43169e-07	2.30256e-06
MTFR2	2.34192	2.55792e-11	5.79493e-10
CUBN	2.33922	4.64814e-05	0.000173359
DKC1	2.33564	5.51381e-15	3.80692e-13
FARSA	2.33547	2.81158e-09	3.31671e-08
DEPDC7	2.33236	2.44399e-05	9.95383e-05
APOLD1	2.33009	0.00139874	0.00357337
CXorf57	2.32514	5.8686e-07	3.69807e-06
LCP1	2.3227	0.000575259	0.00162963
SCD	2.31721	4.24953e-06	2.11271e-05
GBE1	2.31628	1.45195e-09	1.84666e-08
XRCC6	2.31279	2.2444e-12	6.92377e-11
MBTPS2	2.31185	2.57944e-10	4.15971e-09
C1QTNF3	2.30804	0.028688	0.0510312
NCAPD2	2.30793	2.30605e-12	7.10022e-11
DPH2	2.30033	3.79242e-12	1.10577e-10
KRT79	2.30023	0.00125441	0.00324519
FANCA	2.3	6.70674e-09	7.10736e-08
CTSV	2.29988	7.47758e-05	0.0002642
SPARC	2.29977	1.87677e-06	1.03359e-05
TNFRSF14	2.29976	1.72638e-05	7.29574e-05
SC5D	2.29834	3.06525e-07	2.07799e-06
MAN2C1	2.29208	3.20672e-10	4.98425e-09
MELK	2.2877	1.16479e-07	8.84206e-07
RAD51	2.28663	2.23948e-08	2.06938e-07
RFXANK	2.28123	1.05931e-09	1.41618e-08
POLA2	2.27635	1.81146e-10	3.06374e-09
SOAT1	2.27598	7.00391e-06	3.2932e-05
ARAF	2.27595	7.30546e-12	1.94841e-10
SHMT2	2.27495	7.60934e-09	7.9477e-08
MARS	2.27462	1.79385e-11	4.27308e-10
POPDC3	2.27043	0.00398023	0.00898856
PRC1	2.27022	7.89008e-09	8.20867e-08
LIG3	2.26935	1.29052e-13	5.6083e-12
MTX1	2.2669	4.93145e-10	7.28256e-09
APEX2	2.26651	4.92175e-12	1.38443e-10
KIRREL	2.26586	7.51662e-09	7.86631e-08
CEP85	2.26083	3.14495e-11	6.87106e-10
PPME1	2.25888	1.9607e-09	2.41663e-08
SLC26A2	2.25585	2.90592e-05	0.000115623
ATG13	2.25476	3.62713e-11	7.74419e-10
CD99L2	2.25216	4.92844e-09	5.44347e-08
THNSL1	2.25186	1.82965e-08	1.72567e-07
E2F8	2.25181	2.13227e-10	3.52678e-09
ZNF730	2.25018	3.9496e-16	3.68375e-14
DDX49	2.24749	7.45782e-10	1.04521e-08
TCF19	2.24658	9.69792e-11	1.81115e-09
UTP4	2.24554	1.24764e-10	2.25098e-09
LGALS3BP	2.23983	4.27832e-05	0.000161579
PRMT1	2.23615	1.49507e-10	2.61171e-09
GEMIN4	2.23537	2.59672e-10	4.1707e-09
RIOX2	2.23457	3.13889e-12	9.4457e-11
NAT10	2.23361	2.41679e-14	1.34305e-12
ZNF45	2.23027	4.59034e-11	9.48699e-10
EBP	2.22921	9.93954e-08	7.69916e-07
ABHD10	2.22848	4.05336e-10	6.15686e-09
RFC2	2.22808	2.5051e-09	2.99953e-08
LMAN2L	2.22668	6.66023e-12	1.79736e-10
POMK	2.2243	1.27653e-07	9.57641e-07
BAAT	2.22353	0.0162722	0.0312493
ESCO2	2.22345	7.94534e-08	6.29822e-07
LIPA	2.21942	2.44868e-11	5.58713e-10
IMMT	2.21856	1.24343e-13	5.43327e-12
EIF4H	2.21538	1.75782e-14	1.03452e-12
PHGDH	2.2139	0.0249427	0.0452829
ESYT1	2.21235	5.52659e-10	8.09399e-09
ATG9A	2.21204	1.06749e-08	1.06943e-07
SLCO4A1	2.21069	0.00532524	0.0116697
HSD17B7	2.20732	3.18805e-09	3.70674e-08
TBCCD1	2.2072	4.59211e-11	9.48699e-10
NHP2	2.20617	2.25611e-09	2.74467e-08
ALG12	2.20506	6.49144e-11	1.28134e-09
NUSAP1	2.20426	5.17299e-08	4.3446e-07
RAD23A	2.20083	1.12983e-09	1.49665e-08
DDB1	2.20069	2.90188e-10	4.56881e-09
GPX7	2.19721	0.00342354	0.00787453
FAM120B	2.19707	8.83492e-10	1.21263e-08
ACTL8	2.19664	2.14925e-05	8.85828e-05
MRPL49	2.19575	6.73008e-11	1.32516e-09
CDC25C	2.19515	1.73298e-09	2.16604e-08
CNDP2	2.19209	9.53107e-08	7.41742e-07
NNT	2.19141	3.83601e-07	2.53861e-06
NAPA	2.18529	1.31421e-09	1.69857e-08
TOE1	2.18429	1.2075e-11	3.01383e-10
MAGED1	2.18025	4.17006e-07	2.73135e-06
SLC25A19	2.17994	9.78257e-10	1.32559e-08
TXLNA	2.1793	8.94034e-11	1.69145e-09
GPR3	2.17727	3.81378e-06	1.92366e-05
CDKN1A	2.17702	0.000705334	0.00194659
FDFT1	2.17515	1.49422e-07	1.0962e-06
PTTG1	2.17284	2.51122e-05	0.00010186
AIFM1	2.17051	7.45426e-11	1.44809e-09
SLC6A15	2.16351	0.0035939	0.00821778
MRPS7	2.15846	1.00463e-13	4.47564e-12
CKAP5	2.15633	7.57133e-13	2.68345e-11
DIAPH3	2.15494	6.73011e-08	5.4653e-07
ANKFY1	2.1542	1.17134e-10	2.12776e-09
RNF123	2.15103	1.54446e-08	1.483e-07
POLD2	2.14969	7.93446e-08	6.29343e-07
KAT5	2.14606	3.29206e-09	3.813e-08
APOO	2.14587	2.73605e-11	6.11915e-10
FAM234A	2.14439	1.95873e-07	1.39463e-06
FOXL2NB	2.14362	6.12083e-08	5.04024e-07
COASY	2.14285	3.86787e-11	8.18153e-10
EXOSC10	2.14249	2.43459e-11	5.57092e-10
USP5	2.14153	1.03703e-09	1.38988e-08
CDK1	2.14078	1.88836e-07	1.34874e-06
CDCA7L	2.14044	0.0074867	0.015809
GSN	2.13862	1.37147e-06	7.84757e-06
LRRC59	2.13789	1.57644e-09	1.98756e-08
ASB9	2.13547	3.58333e-05	0.000138344
PLK4	2.13345	6.79116e-09	7.18727e-08
KXD1	2.1334	8.27291e-11	1.58587e-09
NME7	2.13235	2.69861e-11	6.07054e-10
PPT1	2.13023	2.36399e-10	3.85908e-09
TMX2	2.12957	2.76988e-09	3.27479e-08
INTS3	2.12846	1.60735e-10	2.76842e-09
JAM3	2.12799	0.00171795	0.00429865
GYS1	2.12719	4.60528e-07	2.98212e-06
MBTPS1	2.12393	1.40237e-10	2.47964e-09
EIF3M	2.12334	2.02647e-10	3.37724e-09
BCHE	2.12225	0.0232932	0.0426524
TANGO6	2.12078	3.5659e-09	4.09155e-08
FAM133A	2.11927	0.00137958	0.00353177
WDR54	2.11858	3.18543e-06	1.64363e-05
INPP5B	2.11757	4.87784e-13	1.81367e-11
ME1	2.11598	0.000609238	0.00171462
ZNF415	2.11474	0.00010017	0.000342761
TCP1	2.11459	2.09843e-08	1.9492e-07
GINS4	2.11237	6.99431e-08	5.64535e-07
TUBGCP4	2.11213	2.03778e-11	4.76547e-10
SF3B3	2.11154	1.67026e-10	2.86441e-09
LDHB	2.11067	2.86508e-11	6.37311e-10
RAB38	2.11026	0.00733919	0.0155322
CHID1	2.10927	9.63073e-09	9.73387e-08
TRIM32	2.10842	3.44654e-08	3.03528e-07
CENPBD1	2.10806	4.49659e-07	2.91885e-06
RIBC2	2.10713	6.54128e-07	4.07845e-06
PNMA2	2.10686	0.00346122	0.00794402
ALDH18A1	2.10511	1.02962e-09	1.38577e-08
LAMA4	2.10483	0.00176059	0.00439294
ARHGAP6	2.10432	2.28163e-05	9.35226e-05
CKAP2	2.10307	3.60709e-07	2.40407e-06
DNASE2	2.10272	4.33355e-09	4.87074e-08
ETV4	2.10241	1.82552e-06	1.00814e-05
HNRNPK	2.1023	3.52385e-19	6.77131e-17
ECE2	2.10027	2.28999e-07	1.6033e-06
SPRYD3	2.09936	1.29165e-07	9.67158e-07
PIK3R4	2.09932	8.32186e-12	2.18658e-10
TANGO2	2.09894	3.97853e-05	0.000151416
ZNF490	2.09679	3.27059e-15	2.3603e-13
PDIA4	2.09656	1.8717e-06	1.03115e-05
SLC35B4	2.09573	3.64611e-09	4.16262e-08
MMAB	2.09473	1.56304e-08	1.49903e-07
POLR1B	2.09196	4.42943e-09	4.95754e-08
TMCO4	2.08816	2.86792e-08	2.57826e-07
EMP3	2.08761	0.000321262	0.000973094
SPG20	2.08612	5.94179e-10	8.59162e-09
TMLHE	2.08538	4.66106e-12	1.32749e-10
FAM210A	2.08407	8.92219e-07	5.34762e-06
AK4	2.08286	0.000378865	0.00112085
GAL3ST4	2.08024	0.000110116	0.000372637
ALDOC	2.07876	0.0245798	0.0447251
DEPDC1B	2.0764	4.06667e-09	4.58694e-08
PRPF4	2.07599	3.09047e-11	6.7799e-10
NRM	2.0757	3.74356e-06	1.89303e-05
ANLN	2.07315	1.30466e-05	5.69615e-05
GLE1	2.07214	3.67685e-10	5.62784e-09
UGT8	2.06739	0.00338002	0.00778905
P4HA2	2.06557	6.62832e-06	3.14348e-05
SMG8	2.0603	4.22344e-12	1.21521e-10
WDHD1	2.05929	1.48838e-08	1.43694e-07
TSSC1	2.05665	1.55596e-10	2.69739e-09
SLC35A5	2.05462	1.35865e-10	2.41573e-09
SNUPN	2.05314	3.75823e-16	3.54675e-14
UPRT	2.05177	1.73895e-15	1.34634e-13
TTI2	2.05141	1.16361e-09	1.53353e-08
USP10	2.04899	7.75104e-14	3.52198e-12
QPCTL	2.04865	4.66771e-05	0.000174019
ELOA	2.04819	4.10223e-12	1.18957e-10
ARCN1	2.0471	5.4408e-11	1.09289e-09
LAMB1	2.0453	0.000308941	0.000939249
INTS9	2.04475	1.66361e-06	9.31961e-06
SFXN1	2.04438	3.33563e-06	1.70951e-05
PPP1R36	2.04381	3.58649e-09	4.10879e-08
EIF3C	2.03988	2.23275e-09	2.72368e-08
LBHD1	2.0398	2.2943e-10	3.76073e-09
DHX8	2.03957	6.41867e-14	3.02874e-12
ZNF530	2.03926	1.09907e-13	4.8557e-12
HSP90B1	2.03847	7.14844e-10	1.00556e-08
ARMCX6	2.03802	8.4288e-08	6.62874e-07
TRIM51	2.03623	0.00163961	0.00412073
TMEM69	2.03317	2.58896e-10	4.16663e-09
GINS2	2.03306	1.85452e-07	1.32814e-06
ADAT1	2.03274	4.37469e-09	4.90316e-08
STIL	2.02886	1.94054e-08	1.81736e-07
ZNF410	2.0271	2.18086e-12	6.76618e-11
PELO	2.02533	4.83991e-12	1.36381e-10
DDX41	2.02422	5.20707e-09	5.70381e-08
FASTKD2	2.02323	1.66561e-12	5.37058e-11
CYB5B	2.02251	1.76057e-08	1.66987e-07
BRCA1	2.02235	2.79668e-07	1.91767e-06
SFXN3	2.02227	1.26098e-07	9.48204e-07
COL15A1	2.02078	0.000536401	0.00152906
SYN3	2.02041	4.65805e-09	5.1807e-08
WDR62	2.0182	8.23484e-08	6.49864e-07
SF3B4	2.01781	7.95262e-10	1.10581e-08
PMPCA	2.01464	6.61764e-09	7.03523e-08
STAG1	2.01452	2.61926e-08	2.38439e-07
SLC47A1	2.01411	5.03813e-05	0.000186046
CENPI	2.0141	4.84211e-10	7.18388e-09
NUF2	2.01363	2.03678e-05	8.45072e-05
RFC4	2.01319	6.09094e-11	1.21582e-09
HK1	2.01176	1.07562e-07	8.2556e-07
ARFGAP2	2.01166	8.46397e-11	1.61473e-09
NCAPD3	2.00928	1.94434e-08	1.81985e-07
CCNF	2.00527	3.056e-09	3.57071e-08
SIAE	2.00526	2.55421e-07	1.76428e-06
SRPRB	2.00379	4.56821e-11	9.47337e-10
COQ5	2.00305	1.53352e-12	5.02221e-11
BRF2	2.00255	1.0022e-06	5.94648e-06
MFAP3	2.00156	6.26625e-07	3.92848e-06
TRAF1	2.00016	0.000209065	0.000659229
C19orf54	1.99988	1.57189e-10	2.71909e-09
GART	1.99918	1.3538e-11	3.33206e-10
WDR63	1.99862	0.00669424	0.0143195
LIF	1.9984	0.00270857	0.00639701
CCDC22	1.99579	9.58464e-08	7.44627e-07
DHFR	1.99522	7.87788e-07	4.79193e-06
GNG12	1.99426	6.06306e-09	6.53819e-08
UBA1	1.99308	3.49296e-09	4.02523e-08
SLC16A13	1.99306	5.39705e-06	2.60762e-05
DNASE2B	1.98632	0.0343093	0.0596662
NRN1	1.98602	0.0208306	0.0386671
RNF20	1.9847	3.57913e-11	7.67252e-10
PRAME	1.98242	0.0318407	0.0559035
SQLE	1.98208	4.37601e-08	3.73624e-07
ZNF85	1.98144	1.81329e-08	1.71409e-07
C7orf49	1.98096	4.182e-10	6.32815e-09
AATF	1.98072	1.99859e-10	3.34124e-09
PPP5C	1.98022	8.13961e-14	3.67758e-12
GFPT2	1.98014	0.000122577	0.000409421
CTPS1	1.98001	7.1423e-10	1.00556e-08
RUVBL1	1.97508	6.50001e-09	6.93436e-08
ZNF595	1.97433	1.05125e-06	6.19975e-06
PRPF8	1.97383	1.36212e-09	1.75197e-08
GLA	1.97318	7.6303e-07	4.66267e-06
RPAP1	1.97285	7.52664e-07	4.61347e-06
CCDC58	1.97084	7.26474e-11	1.41645e-09
DHCR24	1.96899	0.0159332	0.0307055
APOBEC3C	1.96869	0.000175883	0.000564078
MLST8	1.96823	8.50208e-08	6.6765e-07
TRPV2	1.96805	0.00110887	0.00290877
MVD	1.96788	1.56481e-05	6.69453e-05
POLQ	1.96743	4.33326e-10	6.48322e-09
HS1BP3	1.96715	3.70752e-09	4.22065e-08
EIF5A2	1.96652	2.92339e-06	1.52171e-05
MFN2	1.96646	1.0493e-09	1.40397e-08
ST6GAL1	1.96515	0.0023468	0.00564457
HSPA8	1.96427	5.96553e-07	3.75322e-06
TROAP	1.9632	1.18685e-06	6.91092e-06
DHX38	1.96238	2.10325e-11	4.89705e-10
STK11IP	1.96192	1.56436e-09	1.97545e-08
PGD	1.9614	1.01999e-05	4.59544e-05
SLC25A15	1.95951	2.10842e-08	1.95735e-07
DARS2	1.95778	1.09483e-07	8.3788e-07
ARL13B	1.95341	4.5319e-06	2.23567e-05
GAA	1.9516	3.1249e-06	1.61553e-05
AAMP	1.95143	6.11984e-10	8.80914e-09
TRAFD1	1.95129	2.13389e-10	3.52678e-09
PMP2	1.95078	0.031861	0.0559269
RFX5	1.94926	1.31758e-10	2.36645e-09
RNF4	1.94916	1.75938e-12	5.5786e-11
ENTPD7	1.94834	3.44885e-08	3.03563e-07
TMEM179B	1.94693	4.87634e-07	3.136e-06
FAF2	1.94651	1.72575e-13	7.33973e-12
LAS1L	1.94454	8.85111e-12	2.29539e-10
PIGV	1.94318	7.33799e-10	1.03023e-08
SMC1B	1.94304	3.76174e-08	3.27489e-07
FIBP	1.94183	1.10902e-07	8.48337e-07
ZNF649	1.94077	2.80972e-06	1.46973e-05
PCYT1A	1.93864	3.4417e-11	7.4178e-10
COCH	1.9374	4.9507e-07	3.18126e-06
CAPG	1.93429	0.0787287	0.121424
IFT122	1.93358	4.802e-09	5.31855e-08
NDUFS7	1.9316	6.08511e-05	0.000220121
TRAIP	1.93118	1.1166e-07	8.52498e-07
API5	1.93095	5.02879e-10	7.41945e-09
MEGF10	1.92959	0.0185003	0.034902
RFWD3	1.92923	2.58598e-10	4.16604e-09
HBP1	1.92576	3.32564e-09	3.84631e-08
NEFH	1.92418	0.0399901	0.0679888
ALDH7A1	1.924	6.24311e-05	0.000225173
PFAS	1.92367	8.25409e-10	1.14275e-08
RAB5C	1.92347	8.75002e-10	1.20202e-08
RTN4IP1	1.92263	2.15553e-10	3.55885e-09
AK2	1.92248	3.78054e-08	3.2881e-07
LPCAT3	1.92125	7.31612e-06	3.42486e-05
DLGAP5	1.92067	1.42078e-05	6.15596e-05
C9orf64	1.91887	1.07973e-08	1.08021e-07
RTP4	1.91635	6.93652e-05	0.000247274
PJA1	1.9158	6.98292e-08	5.63902e-07
L3MBTL2	1.91554	1.1254e-07	8.57986e-07
XYLB	1.9133	2.90797e-06	1.51516e-05
MMS19	1.9126	6.67774e-09	7.08605e-08
HMGN2	1.91199	7.9501e-08	6.29886e-07
PSMD7	1.9118	2.50401e-09	2.99953e-08
AGBL5	1.91178	3.09697e-10	4.83776e-09
HMCES	1.91121	1.27135e-08	1.24934e-07
FAM60A	1.91014	4.24453e-06	2.11088e-05
BCAS3	1.90997	2.05092e-05	8.50057e-05
GTF2E1	1.9091	6.81707e-12	1.83348e-10
ZNF28	1.90843	1.80333e-07	1.29789e-06
HDLBP	1.90575	1.65864e-10	2.84754e-09
CHMP6	1.90461	2.75323e-07	1.89273e-06
PIGF	1.90317	5.91894e-12	1.62201e-10
ELOVL1	1.90237	2.27536e-06	1.22311e-05
TTF2	1.90175	4.72953e-09	5.25653e-08
TCTN3	1.90086	1.902e-08	1.78441e-07
SLC41A3	1.90044	1.17896e-09	1.54519e-08
P4HB	1.89864	4.68596e-06	2.30384e-05
ADAMTS1	1.89361	0.00193558	0.00477111
LOXL4	1.89302	0.139426	0.198368
SLC36A1	1.89231	2.14478e-08	1.98763e-07
PLOD3	1.88958	2.58131e-05	0.000104279
RTCB	1.88588	1.80604e-07	1.29867e-06
SLC5A6	1.88454	9.32976e-07	5.56887e-06
FRMD6	1.88272	0.000392322	0.00115616
RCN1	1.88263	0.0007449	0.00204201
TRIM48	1.87998	0.000763518	0.00208755
WDR4	1.8799	8.23197e-07	4.97505e-06
YIPF2	1.87885	3.44883e-07	2.31018e-06
XPC	1.87844	4.01512e-07	2.64288e-06
SUPV3L1	1.87366	1.11839e-09	1.4852e-08
DDB2	1.87341	2.25245e-05	9.23978e-05
TMEM186	1.87306	4.11742e-13	1.57858e-11
NPTX1	1.87157	0.0159406	0.030716
MIEF1	1.87069	5.24607e-09	5.7308e-08
GDNF	1.87031	0.00828534	0.0172849
CKAP2L	1.86919	1.50013e-06	8.48424e-06
PDHB	1.86908	1.31601e-12	4.36362e-11
MRGPRX4	1.86897	1.61516e-08	1.5453e-07
CTSL	1.86874	0.00166411	0.00417638
KIF23	1.86808	1.21876e-06	7.07093e-06
SDHA	1.86771	9.96283e-06	4.50261e-05
DHRS3	1.86755	0.00195336	0.00480625
METTL7B	1.86408	0.0108716	0.0219399
ORC6	1.86368	5.28017e-06	2.5617e-05
PARPBP	1.86138	8.08696e-09	8.3807e-08
CH507-9B2.5	1.86025	9.76093e-07	5.80235e-06
RPE	1.8602	5.61892e-10	8.1991e-09
CYB5D1	1.85911	1.47171e-08	1.42256e-07
PLA2G4C	1.85833	0.000709277	0.00195593
C16orf58	1.85772	1.02979e-07	7.93822e-07
INTS7	1.85493	6.31088e-10	9.05103e-09
FCMR	1.85448	0.0169629	0.0324545
GAS7	1.85434	0.00439142	0.00982173
STK10	1.85385	3.90088e-05	0.000148876
HADHA	1.85058	4.33857e-09	4.87151e-08
ZNF492	1.85043	1.94825e-11	4.58975e-10
PKLR	1.85031	0.00242926	0.0058131
TMEM39A	1.85006	2.19669e-09	2.68468e-08
MPI	1.8492	2.15928e-08	1.9999e-07
PPAT	1.84803	2.48147e-07	1.71999e-06
CDK2	1.84639	0.00232044	0.00558959
UTP15	1.84545	1.00157e-10	1.85745e-09
CLSPN	1.84499	6.81799e-06	3.21792e-05
ZWINT	1.84394	2.8432e-06	1.48336e-05
ISCA1	1.84327	4.47338e-10	6.67978e-09
OGFOD2	1.84049	1.31273e-09	1.69803e-08
PRSS35	1.8399	0.000382394	0.00112983
CANX	1.83793	7.03605e-10	9.95723e-09
SAT1	1.83791	0.000764872	0.00209065
GINS1	1.83777	1.2709e-06	7.32814e-06
MICA	1.83546	0.000174843	0.000560967
HSPD1	1.83531	6.42201e-09	6.87414e-08
APIP	1.83515	1.55773e-09	1.9702e-08
RNF121	1.83454	8.90527e-08	6.95544e-07
TXNRD1	1.83436	1.29421e-07	9.68625e-07
CENPL	1.83427	1.52902e-10	2.65714e-09
ZNF317	1.83426	1.35527e-10	2.41511e-09
TIMM10B	1.83398	4.11549e-13	1.57858e-11
BYSL	1.82962	5.27134e-07	3.3737e-06
MCM6	1.82895	3.14142e-08	2.80372e-07
OS9	1.82806	2.298e-08	2.11732e-07
TARS	1.82755	2.99213e-08	2.67947e-07
POLD3	1.82609	3.42915e-10	5.28932e-09
HMGB3	1.82507	3.27231e-05	0.000128243
CXorf40A	1.82264	1.1046e-11	2.78755e-10
NUP85	1.82192	1.3382e-13	5.76837e-12
MTRR	1.81901	9.7208e-11	1.81214e-09
LOXL2	1.81723	0.00533262	0.0116795
SCAMP3	1.81705	3.33706e-07	2.24664e-06
MDH2	1.8153	2.24265e-07	1.57777e-06
TCOF1	1.81416	2.03826e-07	1.44674e-06
HMG20A	1.81372	2.27279e-10	3.73669e-09
DIABLO	1.81337	1.51574e-11	3.69077e-10
CSTF2	1.81224	4.36827e-11	9.08338e-10
TRAF3IP2	1.8101	7.99374e-06	3.70294e-05
RPA1	1.80982	2.89364e-12	8.82421e-11
SMARCAL1	1.80895	3.13318e-09	3.65019e-08
LRGUK	1.80888	0.0021442	0.00522026
CYB5D2	1.80712	8.97227e-06	4.09748e-05
DHX35	1.80672	7.31523e-11	1.42455e-09
USB1	1.80468	4.47628e-08	3.80352e-07
AP3M2	1.80445	0.000126145	0.000420195
BRMS1	1.8041	1.21873e-05	5.36503e-05
ASPHD1	1.80384	0.00702373	0.0149382
CA6	1.803	0.000214983	0.000675085
NAGA	1.80259	4.84311e-06	2.37014e-05
TIPIN	1.80101	1.82465e-10	3.0795e-09
TARS2	1.79958	2.56321e-08	2.34139e-07
ZNF845	1.79894	5.98835e-08	4.95632e-07
CHAF1B	1.79686	1.76611e-05	7.45177e-05
CAT	1.79611	5.5516e-06	2.67622e-05
AMPD2	1.7951	7.80049e-09	8.13137e-08
NSUN3	1.79489	1.4187e-11	3.47571e-10
CTSC	1.79485	5.03228e-06	2.45368e-05
TMEM229B	1.79356	0.00859502	0.0178446
FADS1	1.79101	4.01067e-05	0.000152409
EIF4G1	1.79087	2.11608e-06	1.14911e-05
G3BP1	1.79001	7.14967e-10	1.00556e-08
SPC24	1.78971	1.64667e-05	6.99965e-05
FOSL1	1.78937	0.0184135	0.0347726
FTSJ1	1.78598	3.66133e-12	1.0695e-10
SLITRK2	1.78576	0.00414092	0.00931029
ECT2	1.78401	2.08716e-05	8.63223e-05
SYCE2	1.78372	2.4746e-07	1.71672e-06
RETSAT	1.78278	5.23414e-05	0.000192526
POLR2B	1.78208	7.39588e-08	5.92748e-07
ZNF677	1.78116	5.71386e-06	2.74489e-05
TNFRSF10C	1.77912	0.000180698	0.00057786
STRADA	1.77908	1.21642e-11	3.03135e-10
ARMC9	1.77893	8.1035e-05	0.0002843
BCKDHA	1.77857	8.34787e-07	5.03911e-06
IKBKAP	1.77845	2.33417e-10	3.81823e-09
HOXB13	1.77719	0.0292197	0.0518613
LIN7C	1.7763	4.14047e-07	2.71531e-06
TFB1M	1.77514	5.32167e-08	4.4554e-07
ICOS	1.7749	8.75541e-09	8.99163e-08
BAK1	1.77453	2.80716e-07	1.92317e-06
CEP72	1.77445	6.09474e-08	5.02611e-07
TIMMDC1	1.77444	8.71582e-11	1.65486e-09
SNX11	1.77292	6.00999e-10	8.67452e-09
IVNS1ABP	1.77053	0.00020837	0.000657426
ZMAT5	1.77038	3.03567e-06	1.57347e-05
CCNB2	1.76943	2.19416e-06	1.18586e-05
CCDC163	1.76897	0.000155417	0.000504425
CDC23	1.76772	3.10447e-11	6.79887e-10
CORO1C	1.76573	2.60642e-09	3.11151e-08
C11orf70	1.76538	4.34971e-11	9.05661e-10
CCDC51	1.76534	6.65227e-08	5.41864e-07
LARS2	1.765	6.17044e-08	5.07123e-07
PAICS	1.76496	1.34244e-09	1.72945e-08
TCTN1	1.76489	1.53534e-07	1.12275e-06
GPATCH3	1.76473	2.46606e-08	2.25782e-07
ATG9B	1.76472	2.11135e-07	1.49396e-06
COPB1	1.76403	6.71057e-08	5.45301e-07
DLD	1.76391	2.2979e-09	2.78701e-08
TUT1	1.76366	5.52007e-09	6.00543e-08
TTC26	1.76328	3.72296e-08	3.24441e-07
GRIK2	1.76068	0.00213062	0.00519354
AHRR	1.75906	0.000866469	0.00233356
CCT7	1.75833	8.52906e-09	8.78746e-08
FREM1	1.75778	0.00106877	0.00281889
FBXO36	1.7505	6.28941e-07	3.94145e-06
CNRIP1	1.75018	0.00270317	0.0063871
UPP1	1.74849	0.00887484	0.0183491
OCA2	1.74749	0.166426	0.230817
ORC5	1.74689	6.4374e-09	6.88137e-08
ZNF622	1.74564	8.08324e-07	4.90562e-06
TGOLN2	1.74503	1.57012e-08	1.50312e-07
SLC25A45	1.74254	9.68307e-06	4.39111e-05
NIM1K	1.74247	9.1467e-07	5.46574e-06
AEN	1.74245	3.60449e-05	0.000138912
EXTL3	1.74191	2.23322e-05	9.16563e-05
SLFN11	1.74064	0.00428077	0.00959309
NUP107	1.73994	1.48121e-08	1.43088e-07
SLC25A44	1.73948	2.87762e-08	2.58419e-07
ELMO2	1.73822	2.64458e-07	1.82196e-06
AP2B1	1.73715	5.52148e-10	8.09394e-09
TTI1	1.73702	1.70815e-10	2.92311e-09
NRIP3	1.73547	0.00300353	0.0070034
NTMT1	1.73534	8.50442e-06	3.90885e-05
PTCD1	1.73404	6.81419e-08	5.52233e-07
ARL2BP	1.73343	6.54331e-06	3.11056e-05
FAM86C1	1.73271	2.66686e-06	1.40468e-05
AHCY	1.73247	3.6813e-06	1.86568e-05
MRPL47	1.73104	1.83877e-09	2.28044e-08
CDK20	1.73043	2.29836e-07	1.60704e-06
HDAC9	1.72813	7.33122e-07	4.51244e-06
TMEM199	1.72789	2.36634e-11	5.42252e-10
RABL3	1.72545	4.86958e-09	5.38966e-08
AREL1	1.72531	1.71136e-08	1.62796e-07
INVS	1.72331	1.44754e-09	1.84252e-08
MSH2	1.72223	9.68906e-08	7.52341e-07
PSMC3	1.721	3.10392e-08	2.77492e-07
PRDX1	1.7192	0.00157639	0.00397374
CMSS1	1.71849	8.55136e-10	1.17973e-08
TSTD2	1.71775	2.38957e-07	1.66135e-06
GLB1	1.71707	1.34289e-07	9.97565e-07
TICRR	1.71527	4.48837e-08	3.80974e-07
ALKBH2	1.71411	1.08395e-06	6.36523e-06
NUCB1	1.71322	5.81597e-08	4.83119e-07
METTL2A	1.71248	4.03987e-13	1.5634e-11
P2RX6	1.70808	0.00124679	0.0032286
CKS2	1.70747	3.96673e-06	1.99011e-05
C17orf80	1.70684	1.37992e-08	1.34115e-07
FAM19A3	1.70612	0.00124489	0.00322474
DLX1	1.70514	0.0125569	0.0248999
PROKR1	1.70477	1.69642e-08	1.61626e-07
SARS2	1.7043	1.30082e-05	5.68382e-05
PLSCR4	1.70335	0.00722144	0.0153158
NUP160	1.7008	7.97849e-08	6.31611e-07
NUP155	1.6979	7.70992e-07	4.70771e-06
XRCC1	1.69774	2.43538e-09	2.92925e-08
ZNF384	1.69759	3.4244e-09	3.9548e-08
CAD	1.69709	4.42671e-07	2.877e-06
RAD51AP1	1.69674	3.83942e-05	0.000146881
FAM72B	1.69558	1.76107e-08	1.66987e-07
TEX10	1.69443	5.2422e-09	5.73049e-08
PPP2R1A	1.69409	1.13404e-07	8.63336e-07
TMPRSS5	1.69104	4.8643e-05	0.00018042
ITIH6	1.69061	0.117418	0.171352
MTCH2	1.68917	6.59582e-09	7.02248e-08
PLEKHB2	1.68669	1.37972e-06	7.88714e-06
SGO2	1.68595	4.00019e-05	0.000152083
KATNB1	1.68595	1.4461e-06	8.21948e-06
PCLAF	1.68587	1.50696e-05	6.46785e-05
UHRF1	1.68508	2.27655e-06	1.22334e-05
EXT2	1.6848	1.52843e-06	8.62899e-06
ZNF256	1.68452	7.72365e-09	8.06181e-08
ATIC	1.68417	4.48648e-09	5.00384e-08
SLC4A2	1.68238	8.17049e-05	0.000286058
TRIM68	1.68215	6.09562e-07	3.82903e-06
ZC3HC1	1.68212	3.92016e-08	3.39428e-07
CBWD2	1.68205	1.57831e-09	1.98827e-08
ZWILCH	1.68069	2.73781e-08	2.47396e-07
ZNF619	1.67947	1.13038e-08	1.12327e-07
HACL1	1.67914	1.92604e-06	1.05852e-05
TMSB15A	1.67901	0.00120514	0.00313259
PPP2R5D	1.67696	5.72155e-07	3.62115e-06
CBLL1	1.67577	8.51528e-11	1.62065e-09
HAUS8	1.67528	1.08502e-08	1.08428e-07
TNFRSF19	1.67441	0.0105224	0.0213379
SLC31A1	1.67416	1.08515e-05	4.84249e-05
SERGEF	1.67166	1.08856e-05	4.85228e-05
TMED1	1.67163	4.75349e-06	2.33214e-05
WDCP	1.6703	4.30388e-10	6.44531e-09
ANKMY2	1.6701	7.17142e-08	5.76497e-07
SGTA	1.66874	1.07036e-06	6.30165e-06
EDEM2	1.66778	7.78558e-07	4.74846e-06
KCNK5	1.66762	0.00323771	0.00749248
ST7	1.66595	7.81178e-05	0.000274791
TPP1	1.66531	6.7367e-05	0.000240905
SLC35A4	1.6649	2.01389e-06	1.10036e-05
CUL7	1.6643	4.24827e-05	0.000160635
SNX17	1.66419	6.1091e-08	5.03535e-07
TVP23B	1.66342	7.27674e-10	1.02253e-08
ECSIT	1.66147	0.00025489	0.000789215
JKAMP	1.66118	4.20687e-08	3.6131e-07
CIAPIN1	1.66053	3.52601e-08	3.09331e-07
SRPRA	1.65954	1.92243e-06	1.05691e-05
ATP6V0D2	1.65934	0.0488001	0.0806793
ZNF177	1.65873	3.50892e-09	4.03779e-08
POLA1	1.6571	5.08356e-09	5.59542e-08
ZNF200	1.65657	1.17369e-09	1.54291e-08
HMGCL	1.65631	2.30735e-08	2.12348e-07
GM2A	1.6562	9.68837e-05	0.000332945
PLOD2	1.65587	0.015122	0.029298
CLTC	1.65554	7.81802e-08	6.21583e-07
HPS3	1.65494	9.84017e-07	5.84509e-06
EXOC7	1.65436	5.88576e-10	8.51833e-09
ZNF408	1.65422	2.41729e-06	1.29157e-05
GNL2	1.65401	1.28259e-08	1.25671e-07
ZW10	1.6538	2.43348e-08	2.23312e-07
NUDC	1.65335	7.25298e-08	5.82173e-07
WRAP53	1.6521	6.22959e-08	5.11616e-07
TKT	1.65151	4.17263e-05	0.000158044
NRBP1	1.65137	1.75683e-07	1.26901e-06
CS	1.65122	4.25773e-07	2.78077e-06
C2orf42	1.65109	2.87214e-13	1.15385e-11
PLS3	1.65075	6.57772e-05	0.000235696
CEP19	1.65075	2.09834e-06	1.14064e-05
SLC35C2	1.65057	6.8866e-06	3.24666e-05
ATP6V0A1	1.64978	1.82616e-05	7.67062e-05
C6orf58	1.64745	4.87082e-10	7.21307e-09
ZDHHC9	1.64525	1.03126e-06	6.09395e-06
AAR2	1.64509	9.97465e-08	7.72261e-07
DNAJA3	1.64396	6.27636e-11	1.24505e-09
NRCAM	1.64372	0.0403791	0.068577
C5orf22	1.64358	6.09958e-05	0.000220495
SDHB	1.64326	5.2162e-08	4.37858e-07
POLDIP3	1.64317	7.49268e-07	4.59795e-06
ALX1	1.6417	0.00689494	0.0147035
ROBO1	1.64046	0.0069403	0.0147882
SF3A3	1.64	2.70751e-11	6.08199e-10
PIAS3	1.63992	4.45635e-06	2.20409e-05
REG3G	1.63987	0.0214919	0.0397605
UMPS	1.63911	4.00421e-09	4.52609e-08
GTF3C1	1.63846	1.76106e-06	9.79673e-06
FCHSD1	1.63473	8.21977e-06	3.79552e-05
DPYSL4	1.63455	0.0141328	0.0276163
NUDT17	1.63346	0.000150374	0.000489251
GGCX	1.63227	1.47682e-07	1.08393e-06
ANGPTL4	1.63158	0.0961423	0.144426
GAGE2A	1.63143	0.0261102	0.0470953
C11orf98	1.63064	1.20405e-05	5.31066e-05
TBRG4	1.63027	3.80747e-06	1.9223e-05
PPIL1	1.62971	3.37919e-08	2.98917e-07
SNRNP40	1.62812	2.74318e-09	3.25279e-08
CSPG4	1.62711	0.0331858	0.0579397
ACSL1	1.62564	3.94101e-05	0.000150192
ZFPL1	1.62521	3.78041e-05	0.000144902
GLMP	1.62513	0.0020987	0.00512591
PDIA5	1.62453	0.000372618	0.00110524
CTNNA1	1.62207	3.64001e-08	3.17932e-07
PQLC2	1.62166	2.58544e-05	0.000104419
TRMT61B	1.62135	1.75771e-08	1.66868e-07
IPPK	1.62069	5.4071e-05	0.000198271
EARS2	1.62051	8.22622e-09	8.50843e-08
GFM1	1.61955	1.52188e-08	1.46308e-07
POP1	1.61946	8.4623e-06	3.89398e-05
FAM180B	1.61932	0.00424533	0.0095217
SMC2	1.6187	2.33015e-05	9.52181e-05
GGH	1.61759	6.29438e-05	0.000226765
PARN	1.61613	7.19837e-09	7.56802e-08
NCEH1	1.61539	0.000193525	0.000614726
DNAJC7	1.61482	4.6526e-11	9.57476e-10
ARHGEF39	1.61463	2.14162e-07	1.51218e-06
ACAD9	1.61245	1.24932e-09	1.62524e-08
RRP12	1.61213	2.34772e-05	9.58867e-05
FUZ	1.61121	2.45354e-06	1.30656e-05
DDX3X	1.61105	5.46876e-07	3.48328e-06
TMED9	1.61049	1.23877e-06	7.1688e-06
RGS5	1.61023	0.03541	0.0613396
CDCA2	1.60967	0.000828379	0.00224271
POLR2E	1.60922	1.03005e-05	4.63423e-05
NEMP1	1.60917	2.91268e-07	1.98948e-06
ZIK1	1.6074	1.6389e-05	6.97966e-05
WARS	1.6067	0.00208265	0.0050914
MPP1	1.60632	0.000136005	0.000449192
TGDS	1.60596	0.000912737	0.00244194
ZNF543	1.60501	2.41147e-10	3.92855e-09
ZNF766	1.60494	2.78424e-09	3.28688e-08
KPNA6	1.60412	3.48619e-09	4.02033e-08
DAXX	1.60369	7.09599e-09	7.47022e-08
ZNF512	1.60367	1.14572e-05	5.07866e-05
UBAP2L	1.60287	1.98242e-09	2.43775e-08
TFB2M	1.60015	7.40745e-07	4.55266e-06
MED27	1.59819	5.80973e-07	3.66677e-06
ILVBL	1.59762	0.000661212	0.00183947
ZNF486	1.59754	0.000258796	0.00079992
ISOC2	1.59706	1.61775e-05	6.89878e-05
ALAS1	1.59487	2.5412e-05	0.000102893
PIGB	1.59476	1.25045e-10	2.2535e-09
ATP5A1	1.59427	1.67317e-09	2.09956e-08
OGDH	1.59345	1.27584e-05	5.58715e-05
ZNF57	1.59335	1.42495e-08	1.37904e-07
GSTZ1	1.59297	0.00134057	0.00344241
GRN	1.59227	9.1088e-05	0.00031527
XRCC2	1.59208	9.53028e-05	0.000328219
MECR	1.5914	5.68309e-07	3.60109e-06
TRPM2	1.59077	0.00524742	0.0115213
MKS1	1.58831	5.32888e-10	7.81879e-09
UBIAD1	1.58712	2.70675e-09	3.21445e-08
ZNF41	1.58521	6.58244e-08	5.37274e-07
HAT1	1.58501	3.78104e-08	3.2881e-07
ERAP2	1.58423	0.0324737	0.0568708
PSMD1	1.58354	5.46741e-08	4.56304e-07
B4GALT4	1.58343	3.57284e-08	3.12751e-07
HBS1L	1.58128	4.17181e-06	2.07926e-05
PEPD	1.58046	3.76422e-05	0.00014442
MRPS11	1.57696	1.01438e-06	6.00979e-06
SH2D1B	1.57676	3.0457e-14	1.61382e-12
BCAT2	1.57635	0.000491959	0.00141323
MTMR2	1.57633	8.09704e-06	3.74535e-05
LBR	1.57607	2.9373e-05	0.000116709
SORD	1.57576	0.00013907	0.000457797
EXOSC8	1.57424	1.74824e-08	1.66067e-07
TRIM5	1.57251	5.55035e-05	0.000203033
HTATIP2	1.57198	0.019199	0.0360538
FAAP24	1.57167	1.89009e-08	1.77533e-07
POC1A	1.57164	5.14559e-05	0.000189575
C19orf70	1.57161	0.000183581	0.000586291
PDHX	1.571	3.83735e-08	3.32981e-07
MRPS12	1.56997	3.13509e-05	0.000123461
COPG2	1.56891	6.35608e-06	3.02968e-05
NMD3	1.56883	1.90139e-05	7.95519e-05
BUD31	1.56881	6.24546e-09	6.71107e-08
DCLRE1B	1.56874	2.57734e-08	2.3516e-07
MGST1	1.56825	0.061854	0.0989578
PYGB	1.56741	0.00497505	0.0109823
ADORA2B	1.56726	0.00599999	0.0129702
LMAN2	1.56639	6.42597e-06	3.05741e-05
EIF3I	1.56565	2.15104e-07	1.51666e-06
MRTO4	1.56548	8.13535e-08	6.42649e-07
ZSCAN32	1.56438	1.43138e-10	2.52534e-09
RHEBL1	1.56357	0.000246492	0.000765291
WWP2	1.56349	9.23039e-05	0.000318924
NUP93	1.56335	1.46874e-06	8.33331e-06
MYC	1.56334	0.00477451	0.0105762
CSE1L	1.56291	8.43753e-06	3.8837e-05
HSPA9	1.5629	3.26259e-08	2.9005e-07
SMC1A	1.56254	2.13968e-07	1.51199e-06
SLC1A4	1.56253	0.0120478	0.0240219
AARS2	1.5604	9.68027e-05	0.000332738
FANCD2	1.56016	5.27328e-06	2.56101e-05
NUP205	1.56002	4.06595e-08	3.50339e-07
ITGB3	1.55999	0.129018	0.18563
DHDDS	1.55943	3.94063e-07	2.60353e-06
GALNT2	1.55821	0.00124628	0.00322781
RNF185	1.55698	2.41857e-06	1.29182e-05
RNF157	1.55635	0.00274308	0.00646852
WDR45	1.55501	2.14716e-07	1.51527e-06
TUBB	1.55393	8.18381e-06	3.78329e-05
ST6GALNAC4	1.55303	0.000870828	0.00234371
POGLUT1	1.55263	2.59299e-07	1.78951e-06
SARDH	1.5516	0.00142411	0.00362657
CD96	1.55041	3.32861e-08	2.94933e-07
NOLC1	1.55018	4.68092e-07	3.02251e-06
HFE	1.54894	0.0125487	0.0248868
MOSPD2	1.54612	0.0019112	0.00471781
GYG1	1.54557	3.81525e-08	3.31244e-07
WDR6	1.5449	2.26575e-07	1.59051e-06
ABCB8	1.54321	0.000172696	0.000554304
CPSF3	1.54257	9.46639e-10	1.29042e-08
LRRC41	1.54237	9.49548e-09	9.62056e-08
GPD2	1.54217	2.44105e-06	1.30121e-05
C11orf49	1.54188	4.67605e-07	3.02059e-06
NFYC	1.54039	3.22026e-09	3.73527e-08
ABCC4	1.5387	0.00300043	0.00699792
FTSJ3	1.53836	3.22623e-07	2.17477e-06
CSTF2T	1.53751	9.2476e-09	9.41826e-08
ATP6V1A	1.53621	7.30496e-09	7.65989e-08
HDHD2	1.53604	1.80595e-06	9.99414e-06
ARFIP2	1.53535	5.23702e-05	0.000192588
RRP8	1.53436	7.66623e-11	1.48384e-09
CSTF1	1.53402	9.60559e-11	1.80023e-09
PCSK7	1.53344	5.91412e-05	0.000214666
KDM5D	1.53278	0.0745427	0.116011
SNRNP200	1.53205	7.97979e-08	6.31611e-07
WDR92	1.53181	2.20064e-10	3.62582e-09
BMP8B	1.5317	0.0272463	0.0488753
STEAP1B	1.53136	0.0480029	0.0795345
LSS	1.53003	0.00010757	0.000364952
EDC3	1.52958	7.27326e-09	7.63669e-08
TRUB2	1.52917	6.17488e-07	3.87443e-06
ZNF610	1.52859	0.00221133	0.00536078
TMEM101	1.52598	1.74811e-08	1.66067e-07
WDR55	1.5256	3.28955e-08	2.91959e-07
OSGIN1	1.52542	0.00761748	0.0160596
RAB8A	1.52539	4.721e-07	3.04469e-06
DPF2	1.52461	3.58865e-09	4.10879e-08
CARS	1.52379	1.69914e-06	9.48254e-06
CSGALNACT1	1.5234	0.0174238	0.0331931
GPKOW	1.5224	5.30667e-09	5.78906e-08
ZNF160	1.52239	1.68292e-06	9.40139e-06
ST6GALNAC2	1.52209	0.0210279	0.038997
UPK1A	1.52208	0.0050722	0.0111736
WIPF1	1.52106	0.00871363	0.0180603
ALKBH3	1.52057	4.5993e-08	3.89768e-07
MPP2	1.52056	0.000771956	0.00210532
EFL1	1.52036	3.36125e-10	5.18961e-09
DCTN4	1.5197	7.02738e-07	4.34249e-06
ELK1	1.51876	1.8011e-05	7.58114e-05
GTPBP4	1.51853	1.93582e-07	1.3814e-06
LPAR1	1.51824	0.0284048	0.0505838
COG6	1.51802	2.08001e-05	8.61217e-05
ODF2	1.51727	7.77392e-07	4.74316e-06
USP37	1.5166	4.42215e-07	2.87521e-06
NIPAL3	1.51594	0.0131749	0.0259608
MID1	1.5157	0.0114607	0.0229978
ASH2L	1.51402	1.69243e-05	7.16554e-05
SMYD5	1.51328	2.24996e-06	1.21171e-05
LARS	1.51324	8.727e-08	6.82959e-07
DBR1	1.51298	1.08028e-08	1.08021e-07
EXO5	1.51296	8.99571e-07	5.38561e-06
CEP68	1.51262	3.10825e-09	3.6238e-08
ARHGAP1	1.51254	1.29655e-06	7.46253e-06
NBR1	1.51135	1.11545e-08	1.1119e-07
KCTD14	1.51109	0.0418499	0.0706536
DCPS	1.51089	0.000117238	0.000393399
HGS	1.51076	5.82742e-05	0.00021176
DTX3L	1.50991	0.00275996	0.00650119
PRR9	1.50906	0.00093267	0.00249165
NT5C2	1.50891	6.07568e-06	2.90558e-05
SELENOT	1.5082	5.59008e-07	3.5478e-06
ZSCAN22	1.50504	5.1085e-09	5.61736e-08
NDC1	1.50444	2.65501e-08	2.41006e-07
MMP3	1.5036	0.0555988	0.0903736
MYBBP1A	1.50342	1.73801e-05	7.34098e-05
DPAGT1	1.50261	0.000211808	0.000666983
ZNF267	1.5026	3.53618e-06	1.79899e-05
STPG1	1.5011	0.000116831	0.000392189
POLE3	1.50092	1.73565e-07	1.25541e-06
PCCB	1.50026	2.71199e-05	0.000108978
ELP3	1.49984	3.46308e-06	1.76745e-05
TCTN2	1.49945	0.000128822	0.000428305
ERAL1	1.49891	1.22733e-06	7.11289e-06
ZNF544	1.49859	1.37207e-05	5.97246e-05
SLC35A2	1.49824	1.18854e-06	6.91827e-06
NFATC2	1.49814	0.060455	0.0969626
NOP2	1.49767	1.35909e-05	5.91919e-05
CASP9	1.49641	7.45629e-07	4.58091e-06
CD109	1.49631	0.0231872	0.0424876
FIGNL1	1.49511	5.58592e-06	2.68829e-05
KDM8	1.49506	4.83232e-07	3.11145e-06
PRKD3	1.49458	0.00252513	0.00601632
DHX16	1.49369	2.36665e-07	1.64901e-06
PCTP	1.49307	7.90503e-06	3.66504e-05
UTP14A	1.49195	3.35214e-10	5.18055e-09
PGM3	1.49183	2.23628e-06	1.20535e-05
NDUFA9	1.49177	4.68792e-07	3.02581e-06
COMMD2	1.49114	3.82844e-06	1.92983e-05
BLM	1.48936	3.98321e-05	0.000151546
CERKL	1.4892	0.00793511	0.0166479
FARSB	1.48757	3.50468e-10	5.38499e-09
TECR	1.48664	0.000320161	0.000970216
SMN2	1.48593	0.000163761	0.000528518
IBTK	1.48593	4.62535e-05	0.000172682
CDH2	1.48536	0.0749498	0.116497
CCT4	1.48502	8.97107e-10	1.22921e-08
MCM4	1.48394	1.25777e-05	5.51407e-05
GIT2	1.48391	1.46508e-06	8.31551e-06
RHBDD1	1.48244	1.23552e-08	1.21788e-07
IDH1	1.48213	3.75686e-06	1.89843e-05
PIGO	1.48183	3.81937e-05	0.00014622
SNAI3	1.48163	7.05629e-11	1.38256e-09
PRIM1	1.48146	1.97101e-05	8.21203e-05
GMPPA	1.48108	8.56173e-05	0.000297886
COMMD8	1.48007	5.00091e-05	0.0001848
HYAL3	1.47828	6.31444e-05	0.000227386
PPIL2	1.47827	3.34274e-06	1.71205e-05
C1QTNF6	1.47774	0.00254565	0.00605798
PIP5K1B	1.47753	0.00316567	0.00734603
NSF	1.47651	1.03578e-07	7.98055e-07
PIP5K1A	1.47651	6.85983e-09	7.24553e-08
SLC18B1	1.47623	0.0131292	0.0258898
ACD	1.47569	0.000344008	0.00103151
CLCN2	1.47386	9.54438e-05	0.000328563
ZSCAN20	1.47326	1.13989e-10	2.07888e-09
FNDC3B	1.47234	1.97851e-05	8.23681e-05
ELOVL2	1.47205	0.17545	0.241145
HIST1H2BK	1.47166	0.0116596	0.0233294
LMLN	1.47046	5.28149e-07	3.37884e-06
FTO	1.46881	5.30454e-08	4.44339e-07
BRCA2	1.46875	1.23356e-06	7.14378e-06
TMEM143	1.46753	4.42578e-05	0.00016636
NAA50	1.46713	2.40748e-07	1.67234e-06
ATP5G1	1.46713	9.39213e-06	4.2701e-05
DRG2	1.46712	1.15839e-07	8.79767e-07
ZNF813	1.4671	5.46797e-06	2.63869e-05
EXOSC5	1.46679	4.28793e-05	0.000161865
DUSP3	1.46543	9.4243e-06	4.28228e-05
UGDH	1.4651	0.000487558	0.00140286
DHX9	1.46345	8.28834e-11	1.58692e-09
CUL1	1.46329	5.89452e-08	4.89135e-07
DCTN1	1.46081	7.83503e-08	6.22625e-07
CTSA	1.45993	0.00186152	0.00461732
PEX19	1.45968	1.27324e-08	1.24964e-07
GAPDHS	1.45901	0.0847361	0.129586
ERCC1	1.45841	3.69129e-05	0.000141861
ARF4	1.45836	7.72561e-08	6.16079e-07
C5orf34	1.45761	3.3507e-06	1.71503e-05
PSEN1	1.45746	2.04823e-07	1.45253e-06
TSPAN11	1.456	0.00360602	0.00823487
B9D1	1.4559	0.000112635	0.000379895
MLX	1.45581	2.42532e-09	2.91935e-08
BACH1	1.45574	0.000479394	0.00138186
MCFD2	1.45297	1.53832e-06	8.6756e-06
XPO5	1.45278	2.74246e-06	1.43922e-05
GCN1	1.45166	3.9418e-06	1.97884e-05
TP53BP1	1.45088	4.89585e-05	0.000181295
HOXA4	1.45086	0.0309711	0.0545508
SEC22A	1.45054	5.41933e-11	1.09132e-09
ADA	1.45046	0.0012549	0.0032459
TTC25	1.45005	3.58733e-07	2.3939e-06
TSSC4	1.44938	1.59559e-05	6.81705e-05
PGAP2	1.44675	0.000104086	0.000354132
ERCC3	1.44556	6.33688e-13	2.28082e-11
S100A3	1.44468	0.025026	0.0454187
EPRS	1.44421	6.51013e-07	4.06221e-06
COPS7A	1.44368	3.55219e-07	2.37344e-06
ZNF714	1.44342	2.70991e-07	1.86455e-06
NUFIP1	1.44138	6.20249e-09	6.6705e-08
MAPRE1	1.43963	3.7838e-08	3.28871e-07
RMI1	1.43943	4.34155e-05	0.00016358
PAAF1	1.43941	8.87124e-07	5.31907e-06
SLC2A3	1.43927	0.0195291	0.0365759
TDRD9	1.43901	0.0746092	0.116081
WDR73	1.43783	1.16043e-10	2.11034e-09
NCOA4	1.43694	1.00602e-06	5.96692e-06
ELOVL5	1.4367	2.94259e-05	0.000116861
ZNF350	1.43586	4.00594e-07	2.64012e-06
UQCRC2	1.43552	1.25446e-08	1.23426e-07
ZNF438	1.43506	5.52286e-06	2.66356e-05
STC1	1.43412	0.0326385	0.0570905
URB2	1.43371	2.40385e-06	1.28482e-05
CXorf40B	1.43325	5.02751e-07	3.22671e-06
OSBPL11	1.43238	7.62482e-07	4.66111e-06
MZT1	1.43229	0.000236285	0.000736469
PEX16	1.43174	0.00024103	0.000750232
MNS1	1.43088	0.000295359	0.000901739
ELOVL6	1.42962	0.000169914	0.000545923
ARHGEF19	1.42909	0.0067255	0.0143787
PIGT	1.42815	0.000202183	0.000640059
COL9A1	1.42767	0.099059	0.148166
PDE4C	1.4253	2.85929e-06	1.49126e-05
NDUFS2	1.42427	1.12555e-06	6.58282e-06
HMMR	1.42347	0.00198051	0.00486629
GBF1	1.42289	1.43807e-06	8.17969e-06
POLR3C	1.42276	4.15937e-08	3.57809e-07
MYO19	1.42191	1.53204e-06	8.64633e-06
GEMIN5	1.42157	1.0227e-07	7.89495e-07
RPS6KB2	1.42125	0.00138067	0.003534
NIF3L1	1.42098	2.0027e-10	3.34461e-09
TOMM40L	1.42067	9.05703e-07	5.41825e-06
LAMC1	1.41928	0.00173225	0.00433171
TMEM140	1.41885	0.00123766	0.0032081
EIF1AD	1.41813	2.68971e-09	3.19659e-08
MAGED2	1.41806	0.000104092	0.000354132
RINT1	1.41753	2.84038e-05	0.000113423
NEK2	1.41735	0.000226244	0.000707383
PTGFRN	1.41698	0.0218969	0.0404205
ACOT9	1.41629	4.04953e-10	6.15686e-09
CCL20	1.41568	0.034585	0.0600987
PARS2	1.41544	7.11593e-08	5.73481e-07
CYCS	1.41521	4.7636e-06	2.33553e-05
AMBRA1	1.41505	2.51214e-06	1.33243e-05
MRPS22	1.41419	9.3862e-09	9.52293e-08
RABEPK	1.41391	6.9902e-07	4.32622e-06
CYBRD1	1.41379	0.0718163	0.112371
MANBA	1.41272	0.00870724	0.0180517
SHISA2	1.41259	0.217025	0.288806
RRP7A	1.41189	0.000146922	0.000479685
ZNF430	1.41095	4.30091e-08	3.68396e-07
WBP11	1.41053	5.20217e-06	2.52889e-05
CENPK	1.41029	0.000145729	0.000476473
ZCCHC17	1.40979	0.000141081	0.000463175
TWNK	1.40942	0.000159909	0.000517394
AP2M1	1.409	6.97953e-06	3.2827e-05
RNF138	1.40892	3.02872e-05	0.000119775
MTRF1	1.4054	2.5613e-06	1.3531e-05
SUMO1	1.40536	1.4927e-10	2.61042e-09
MED24	1.40282	2.15358e-06	1.16748e-05
CYP26A1	1.40229	0.000836974	0.00226137
SUPT16H	1.4017	6.62449e-07	4.12067e-06
DCAF11	1.40127	1.84046e-06	1.01569e-05
HNRNPA1L2	1.40114	1.80414e-07	1.29789e-06
RABGEF1	1.40113	1.22067e-06	7.07945e-06
RBM23	1.40047	2.05149e-06	1.11861e-05
SCG2	1.40014	0.0544026	0.0887004
ZNF880	1.39816	0.000247427	0.000768043
ZNF35	1.39736	0.00122808	0.00318534
SCFD2	1.39666	3.47614e-05	0.000135057
CDKN3	1.39652	6.34974e-05	0.000228399
ZNF14	1.39601	8.99155e-05	0.000311482
GTF3C5	1.3946	4.65505e-06	2.29076e-05
IGF2BP2	1.39402	0.00440088	0.00983876
ITGB1	1.39372	0.00114776	0.00300093
COPE	1.39358	0.000179605	0.000574853
ZDHHC12	1.39345	0.000909123	0.00243445
TPM3	1.39333	7.47652e-07	4.5898e-06
TEN1	1.3924	0.000111091	0.000375459
VAMP7	1.39199	3.90892e-05	0.00014904
VAMP7	1.39199	3.90892e-05	0.00014904
FZD6	1.39176	0.0709703	0.111289
INTS2	1.39154	1.39094e-06	7.93423e-06
XAB2	1.39133	0.000125665	0.000418857
DHODH	1.39089	2.2904e-09	2.78002e-08
NONO	1.3897	4.09315e-11	8.58969e-10
ZSCAN25	1.38952	8.24715e-09	8.52455e-08
NOV	1.38933	0.180289	0.246712
C16orf62	1.38705	3.86151e-06	1.94309e-05
QTRT2	1.38652	1.00017e-07	7.73916e-07
FITM2	1.38644	0.000197337	0.000625837
NECAP2	1.38585	3.96712e-07	2.61886e-06
RAB1B	1.38433	9.39255e-05	0.000323686
HEXIM2	1.38423	2.95441e-05	0.000117243
TALDO1	1.38402	2.67737e-05	0.000107807
TUBG1	1.38342	4.35345e-05	0.000163947
AGK	1.38339	3.82565e-07	2.53281e-06
ST3GAL1	1.38152	0.0157088	0.0303133
POLE2	1.38144	1.03716e-05	4.66225e-05
GNPNAT1	1.38124	4.06614e-06	2.03294e-05
MYO1E	1.37997	0.000660683	0.00183832
RRP1	1.37984	4.77446e-05	0.000177459
IPO13	1.37825	4.04351e-06	2.0229e-05
PSAP	1.3781	0.00195197	0.00480433
TIMM17A	1.37777	3.06839e-07	2.07804e-06
ANGEL1	1.3776	0.000148831	0.000484926
TNFAIP1	1.37615	7.34697e-06	3.43424e-05
DCTD	1.376	1.37004e-07	1.0149e-06
CHPF2	1.37567	0.000673198	0.00186823
TBC1D14	1.3742	0.000609877	0.00171611
TMEM184C	1.37398	1.0588e-08	1.0614e-07
YWHAZ	1.37379	3.55713e-05	0.000137567
DCAF7	1.37232	4.10736e-06	2.05162e-05
ANKZF1	1.37131	1.30995e-07	9.7765e-07
ITGB8	1.36912	0.0465942	0.0775468
PRCP	1.36886	0.000261923	0.000808792
MAGT1	1.3687	1.44138e-05	6.22999e-05
HSPA13	1.36856	0.000549179	0.00156296
ZNF155	1.36854	4.87779e-06	2.38564e-05
PIGU	1.36816	1.47019e-05	6.3356e-05
PCOLCE2	1.36626	0.0334162	0.0583001
ZNF347	1.36574	0.000192377	0.000611565
ADAM9	1.36336	0.00536312	0.0117414
ACKR4	1.36299	0.0168146	0.0321978
WDR77	1.36265	1.64982e-06	9.2521e-06
AKIP1	1.36195	1.38205e-07	1.02237e-06
ARL6	1.3607	8.676e-07	5.21181e-06
TOM1L1	1.36067	9.95014e-05	0.000340766
FASTKD1	1.35979	3.24182e-06	1.66787e-05
TRIT1	1.3584	3.00757e-05	0.000119086
DLAT	1.35684	0.000239311	0.000745171
ATP10B	1.35657	0.0161741	0.0310908
ZNF93	1.3564	6.08779e-05	0.000220168
SEPT9	1.35637	0.00125995	0.00325739
BRIP1	1.35586	1.37921e-05	5.99539e-05
BAIAP2L2	1.35516	0.0401686	0.0682703
ARL14EP	1.3548	1.00114e-05	4.51943e-05
DCTN5	1.35443	1.89407e-10	3.1832e-09
MRPS27	1.35437	2.82805e-06	1.4769e-05
PFKFB3	1.35412	7.15425e-05	0.000254014
HIST1H2AH	1.35345	0.000185973	0.000593097
ENPP2	1.35336	0.230179	0.303374
EPDR1	1.35283	0.0940309	0.141829
ZNF225	1.35234	2.81568e-07	1.92818e-06
ATP5F1	1.35233	2.56955e-07	1.7741e-06
CHORDC1	1.35225	1.06867e-05	4.78635e-05
FARP2	1.35197	0.00116085	0.00303
CTR9	1.35107	2.46161e-06	1.30998e-05
ARHGDIA	1.35005	0.000673563	0.00186861
RIOK2	1.3496	2.79585e-08	2.51927e-07
CNBP	1.34907	1.70329e-08	1.62183e-07
SENP2	1.34831	1.67231e-07	1.2118e-06
TMEM38B	1.34822	0.000383327	0.00113237
CD58	1.34737	0.00106302	0.00280557
CDCA3	1.3469	0.000168426	0.000541579
SEC23B	1.34587	1.71009e-05	7.23647e-05
GRPEL1	1.3458	1.84741e-06	1.01918e-05
GALNT7	1.34544	0.00368414	0.00839027
TPSD1	1.34466	0.00274331	0.00646852
POFUT1	1.3438	5.50957e-08	4.59342e-07
CENPO	1.34319	1.94196e-05	8.10157e-05
FANCG	1.34212	4.17451e-05	0.00015807
TDRD7	1.34158	0.00768819	0.0161867
NARS2	1.34137	1.76984e-05	7.46554e-05
COQ8B	1.3413	1.19248e-05	5.26546e-05
HARBI1	1.34109	9.80803e-07	5.82818e-06
ERLIN1	1.34106	1.66696e-06	9.32887e-06
ZMPSTE24	1.33952	4.07346e-07	2.67687e-06
XKR9	1.33945	2.22077e-06	1.19861e-05
KIAA0319L	1.33747	2.35583e-06	1.26127e-05
RAB5B	1.33736	0.000356904	0.00106577
ERMAP	1.3368	8.3378e-06	3.84223e-05
ERP44	1.33613	2.62623e-06	1.38465e-05
TMEM17	1.33577	2.48986e-06	1.32237e-05
SZRD1	1.33572	6.8196e-06	3.21792e-05
AKAP6	1.33529	0.0417996	0.0705835
PROCR	1.3351	0.0334178	0.0583001
EDNRB	1.3348	0.0618866	0.099
TMBIM6	1.33439	4.14283e-08	3.56589e-07
AACS	1.33307	0.000140721	0.000462562
MAB21L1	1.33301	2.72279e-06	1.43083e-05
SCO2	1.33287	0.00368031	0.00838293
RNF14	1.33282	4.36269e-06	2.1629e-05
GTF3C2	1.33274	6.7356e-07	4.17838e-06
SLC25A38	1.33273	0.047858	0.0793191
LDLRAD3	1.33263	0.000454386	0.00131709
CHMP7	1.33257	4.06624e-05	0.0001543
UBR7	1.33216	5.97568e-07	3.75813e-06
ARHGAP31	1.33131	0.00584706	0.0126823
MND1	1.33116	0.000620818	0.00174229
ARHGAP11A	1.33101	0.000231541	0.00072267
RPN2	1.3306	3.58415e-05	0.000138344
DDX3Y	1.32979	0.169909	0.234745
GDAP1	1.32971	0.00274426	0.00646885
CDC26	1.32958	1.15464e-06	6.73567e-06
TMEM222	1.32937	1.68481e-05	7.13894e-05
CRISPLD1	1.3285	0.0517535	0.0850243
RUVBL2	1.32781	9.94953e-05	0.000340766
DCAF1	1.32729	1.29835e-07	9.71269e-07
ZSWIM3	1.32721	4.57561e-09	5.09968e-08
ZNF229	1.32685	0.00656572	0.0140824
NUP88	1.32597	9.66891e-07	5.75409e-06
ATP5G3	1.32592	0.000103658	0.000352954
FOPNL	1.32535	2.3371e-09	2.82382e-08
TMEM255B	1.32454	0.000216873	0.000680487
TMEM106C	1.32441	0.000214185	0.000672977
SCML2	1.32403	0.00567048	0.0123449
CAV1	1.32266	0.0171753	0.032802
FBXO5	1.32262	0.000161985	0.0005234
CTNNBL1	1.32248	7.46483e-08	5.97673e-07
NBAS	1.3224	6.9794e-08	5.63902e-07
COA3	1.32229	4.8058e-05	0.0001785
HPS5	1.32186	0.0053807	0.0117759
MRPL3	1.32177	1.37631e-07	1.01907e-06
RDM1	1.32163	1.11734e-05	4.96808e-05
ULBP2	1.32108	0.0155039	0.0299506
AC004381.6	1.32103	0.000137561	0.000453485
ACSS2	1.32088	9.35173e-05	0.000322697
TSR2	1.32007	1.8784e-07	1.34343e-06
ALG14	1.31997	7.59929e-08	6.06916e-07
RPA2	1.31994	1.94388e-05	8.10745e-05
PRRC1	1.31993	2.8694e-08	2.57826e-07
DDT	1.31991	0.00390402	0.00884324
PLTP	1.31974	0.0107444	0.0217134
RLBP1	1.3193	0.127	0.183074
SLC26A6	1.31901	0.00077572	0.00211414
SLC30A6	1.319	1.12281e-06	6.56922e-06
CHCHD3	1.31889	2.29523e-05	9.39834e-05
ZNF112	1.31859	1.06727e-05	4.7824e-05
DHX40	1.31803	9.36934e-06	4.26095e-05
GLO1	1.31799	8.76881e-06	4.01671e-05
SSR1	1.31776	1.71386e-06	9.55254e-06
CSAG3	1.3174	0.0749744	0.116523
WDR25	1.31738	0.000165616	0.000533373
HNRNPH2	1.31725	8.71764e-09	8.95862e-08
CEP70	1.31682	7.59963e-05	0.000268156
ARNT2	1.31676	0.00588198	0.0127496
ATP6V0D1	1.3166	0.00327337	0.00756514
FKBP10	1.31534	0.0402178	0.0683467
SEC61A2	1.314	3.01316e-05	0.000119248
GOSR2	1.31357	9.94214e-10	1.34265e-08
OIP5	1.31336	0.00169978	0.00425786
TULP3	1.31335	6.79867e-06	3.21321e-05
DDX56	1.31227	7.18492e-05	0.000254876
GNPDA1	1.31209	2.87835e-05	0.000114681
SEC23A	1.31157	0.000218028	0.000683841
ESD	1.31144	4.86992e-06	2.38253e-05
IQGAP2	1.31143	0.013287	0.0261429
DKK1	1.30803	0.0861822	0.131533
SUPT5H	1.30624	5.39768e-07	3.44213e-06
PTDSS1	1.30594	2.0036e-05	8.33042e-05
TSPAN7	1.30563	0.191466	0.259778
SUV39H2	1.30522	3.30709e-06	1.69707e-05
IPO4	1.30442	0.000489753	0.00140791
COQ3	1.30392	5.3679e-06	2.59747e-05
CD83	1.3034	0.00156634	0.00395153
CLIC1	1.30309	0.000115288	0.000387591
PPARGC1B	1.30288	0.000319266	0.000967872
CD59	1.30285	0.000338844	0.0010189
RIPPLY2	1.30238	0.0143442	0.0279743
C11orf24	1.30213	0.00160864	0.004048
TIMM10	1.30073	0.000118849	0.000397884
PMM2	1.30069	2.88596e-05	0.000114956
EXOC3	1.29961	4.61358e-05	0.000172363
NR1D1	1.29958	0.00478129	0.0105897
PIGA	1.2995	0.00220985	0.00535881
SDR39U1	1.29925	4.99349e-06	2.43625e-05
PCBP1	1.29913	1.06419e-07	8.17572e-07
OPA1	1.29903	2.45201e-05	9.98395e-05
FBXO38	1.29816	8.85266e-07	5.30993e-06
RIOK3	1.29816	1.08181e-05	4.83129e-05
IFT172	1.29813	2.9142e-05	0.000115907
LCMT1	1.29809	3.94642e-06	1.98054e-05
WDR46	1.29783	1.4471e-05	6.25299e-05
INSIG2	1.29643	1.48425e-05	6.38582e-05
ZDHHC5	1.29608	3.86876e-07	2.55922e-06
ZNF146	1.29546	5.64425e-05	0.000205854
VAMP3	1.29527	3.37639e-05	0.000131663
NARF	1.29455	4.43351e-05	0.000166573
GALE	1.29407	0.00233195	0.00561288
NRSN2	1.29357	0.000308323	0.00093755
TRIM16L	1.29289	0.000638228	0.00178424
TLDC1	1.29264	0.000160287	0.000518331
CEP41	1.29061	6.70211e-06	3.17375e-05
HLTF	1.2906	0.00186477	0.00462394
CD177	1.29048	0.000364399	0.00108409
SKIV2L	1.2903	4.10917e-05	0.000155892
SERINC3	1.28958	9.13555e-07	5.46113e-06
PRIMPOL	1.28863	6.45793e-05	0.000231976
INIP	1.28774	8.13092e-05	0.000284958
PDXDC1	1.28767	1.54308e-07	1.12634e-06
MTBP	1.28759	0.000352361	0.00105398
MLH1	1.28713	7.76857e-08	6.19195e-07
CEP152	1.28675	6.63097e-06	3.1438e-05
XRCC4	1.28655	2.29709e-05	9.40115e-05
ENOX2	1.28635	0.000117905	0.000395305
TP53TG3D	1.28586	5.09407e-07	3.2668e-06
SLC35F6	1.28517	0.000289142	0.000884112
EXOC2	1.2849	4.38703e-07	2.85703e-06
ADAMTS9	1.28405	0.00463853	0.0103079
FAM213A	1.28389	0.057979	0.0937552
LMAN1	1.28387	6.78453e-06	3.20992e-05
BUB3	1.28368	8.52403e-08	6.69044e-07
PARP1	1.28309	3.84994e-05	0.000147178
PKNOX2	1.28293	0.0326126	0.0570577
THAP1	1.28085	6.3604e-07	3.98124e-06
SRBD1	1.28064	4.34454e-07	2.83283e-06
MPPE1	1.28062	2.62324e-07	1.80804e-06
PSAT1	1.28056	0.216434	0.288188
TMEM99	1.28023	0.000515728	0.00147302
TIGAR	1.28006	1.61441e-05	6.88639e-05
GPN1	1.27901	1.04671e-08	1.05126e-07
PIGG	1.27867	1.48354e-05	6.38449e-05
HCCS	1.27842	1.77134e-06	9.84701e-06
CPPED1	1.27836	0.000572339	0.0016228
MED18	1.2781	1.28677e-06	7.40894e-06
GNG11	1.27753	0.0955965	0.143742
SLC39A9	1.27706	1.51075e-06	8.53525e-06
NDUFAF4	1.277	4.51826e-05	0.000169318
SOX5	1.27669	0.0116982	0.0234037
SPDL1	1.2755	2.68113e-05	0.000107929
POC5	1.27543	5.14737e-06	2.50596e-05
HEATR6	1.27526	1.95071e-07	1.38954e-06
COA7	1.27492	1.27035e-06	7.32757e-06
ACO1	1.27423	0.00236238	0.00567434
POLR3G	1.27346	0.000752457	0.00206025
ACP2	1.27341	9.21635e-06	4.19856e-05
GSTM4	1.27297	0.0024787	0.00591897
GLIPR1	1.27252	0.000845012	0.00228
FREM2	1.27149	0.0325364	0.0569432
UBL7	1.27139	0.00029843	0.000910244
METTL21B	1.27133	6.5949e-05	0.000236205
PITRM1	1.27106	0.001174	0.00305999
ATP5O	1.27053	2.37461e-06	1.27089e-05
MAD2L1BP	1.2703	0.000264255	0.000814731
PSMB2	1.26927	2.21572e-05	9.10317e-05
WIPI1	1.26877	0.0194491	0.0364462
ADORA2A	1.26821	4.30177e-07	2.80724e-06
TRIM16	1.26779	0.00663439	0.0142087
ALDH1B1	1.26595	0.0532309	0.0871578
EIF4G2	1.26565	3.62935e-05	0.000139716
ACSL4	1.26557	0.000831219	0.00224887
DDX19A	1.26549	1.5298e-05	6.56056e-05
TWF1	1.26503	1.38276e-05	6.00752e-05
MRPS9	1.26454	3.49753e-09	4.02759e-08
LRRC46	1.26426	3.19126e-06	1.6461e-05
TAP2	1.26361	0.00814626	0.0170148
DUS2	1.26352	0.0017575	0.0043866
UBE4A	1.26224	0.00110368	0.00289897
UNC45A	1.26208	0.000333083	0.0010046
IFT57	1.2616	0.000507605	0.00145319
VIPAS39	1.25913	3.4761e-06	1.77311e-05
ZNF614	1.25911	5.94005e-05	0.00021546
DDX39A	1.25822	7.31201e-05	0.000258924
SUCLA2	1.25816	2.44141e-05	9.94587e-05
RNASEH1	1.25667	1.62783e-07	1.18333e-06
ZNF77	1.25636	2.43859e-06	1.30077e-05
UBQLN4	1.25508	2.28708e-05	9.36981e-05
AGT	1.25484	0.227957	0.301017
FAHD2A	1.25462	0.000839241	0.00226673
MKRN2	1.25453	1.16516e-06	6.79207e-06
MTHFD1	1.25354	4.34273e-06	2.15434e-05
FSTL1	1.25305	0.0386791	0.0661264
KBTBD6	1.25213	0.000163431	0.000527857
SUCLG2	1.25209	3.28472e-06	1.6883e-05
C1orf74	1.25182	0.000164172	0.000529609
MITF	1.25163	0.000175967	0.000564221
POT1	1.25101	0.000180724	0.00057786
SART3	1.2505	4.99934e-09	5.51033e-08
ERI2	1.25046	3.0051e-06	1.55865e-05
SHROOM2	1.24992	0.0205664	0.0382523
KYAT3	1.24865	6.54696e-05	0.000234857
BCAP31	1.24809	0.000132693	0.000439254
KIAA1549L	1.24799	0.0203935	0.037964
ZMYM1	1.24788	0.00022091	0.000692473
MIF4GD	1.24761	0.000894021	0.00239844
BNIP3L	1.24709	0.00350098	0.00802374
SPACA3	1.24552	0.00136788	0.00350407
WDR76	1.24445	0.000470909	0.00136036
NEDD1	1.24403	1.89543e-06	1.0435e-05
PA2G4	1.244	4.27829e-06	2.12635e-05
SCARB1	1.24392	0.0176368	0.0335306
SLC22A18	1.24356	0.0200184	0.0373637
NANS	1.24338	0.00320007	0.00741077
AAAS	1.24335	5.74704e-05	0.000209268
ZFYVE27	1.24321	0.000374833	0.0011109
KAT7	1.24306	2.17773e-07	1.53481e-06
BLOC1S5	1.24227	1.04719e-05	4.70281e-05
IPO9	1.24226	1.26589e-07	9.51001e-07
BRCC3	1.24184	4.28673e-05	0.000161858
ZKSCAN5	1.24165	4.21773e-07	2.75804e-06
ALG11	1.24158	1.42295e-06	8.10641e-06
NELFCD	1.23976	8.06467e-06	3.73146e-05
JMJD6	1.23966	1.51333e-06	8.54678e-06
PNMAL1	1.23919	0.0503015	0.0828987
CCNG1	1.23897	0.00330759	0.00763746
TMEM43	1.23858	3.68355e-05	0.000141598
PSMC4	1.23797	3.29335e-06	1.6911e-05
ZNF484	1.23777	1.63536e-05	6.96644e-05
PCYT1B	1.23741	0.00188183	0.00465755
RAB7B	1.23523	0.0279059	0.04984
PSMD4	1.2347	1.42316e-06	8.10641e-06
COQ6	1.23467	0.000114292	0.000384647
POLR1A	1.23411	2.94111e-06	1.52994e-05
LRRC34	1.23245	0.00235204	0.00565325
LYPLA2	1.23231	0.000179827	0.000575339
CADM1	1.2321	0.119182	0.173481
PEF1	1.23136	2.10479e-05	8.6967e-05
MKLN1	1.23042	5.08108e-05	0.000187415
GPANK1	1.2302	2.53491e-05	0.000102687
NDUFS1	1.22981	6.38994e-08	5.23437e-07
TMEM80	1.2297	0.0021137	0.00515702
WBSCR22	1.22963	0.000138645	0.000456586
AAGAB	1.22962	4.01798e-09	4.53522e-08
CDK5RAP1	1.22955	5.18779e-06	2.52333e-05
DYRK3	1.22924	0.000353609	0.00105711
SLC35F2	1.22901	0.076569	0.118642
NEIL3	1.22901	0.000136761	0.000451289
GPS1	1.2288	3.96383e-05	0.000150953
UQCC1	1.2284	2.26251e-06	1.21784e-05
NCL	1.22781	8.12489e-07	4.92147e-06
HDAC1	1.22763	5.47991e-07	3.48899e-06
WBP2	1.22731	0.00140998	0.00359805
MPHOSPH9	1.22731	0.000279392	0.000856433
C5orf15	1.22711	0.000448084	0.00130125
TMEM161A	1.22654	0.00190056	0.00469735
MYL6B	1.22633	0.000559515	0.00159039
PHPT1	1.22625	0.00152648	0.00386197
TACC3	1.22546	0.000591767	0.00167135
EIF2B5	1.22505	3.72188e-05	0.000142865
MTFR1L	1.22487	4.4923e-07	2.91725e-06
ATG7	1.22387	6.64194e-07	4.12992e-06
TRMT10C	1.22351	3.26612e-05	0.000128083
EIF2S1	1.22306	1.8191e-06	1.00529e-05
RBBP7	1.22286	6.12678e-06	2.92857e-05
NDUFV1	1.22236	0.000670491	0.00186268
GTF2H1	1.22227	2.96079e-05	0.000117438
FAM126A	1.2221	0.00803248	0.0168146
VCL	1.22117	0.000299162	0.000912127
CDCA7	1.22076	0.0190271	0.0357731
ZNF527	1.21928	2.7275e-08	2.46846e-07
SLC50A1	1.21904	0.000221068	0.00069283
ZNF100	1.21897	6.54984e-05	0.00023486
C1orf174	1.21886	9.64033e-07	5.7435e-06
NXPE3	1.21868	0.00131276	0.00337641
VEPH1	1.21864	0.144643	0.204604
BCOR	1.21791	1.04705e-07	8.05182e-07
EIF6	1.21774	0.000475309	0.00137206
SPATA18	1.21623	0.0179056	0.0339811
SRPK1	1.21585	2.47123e-06	1.31422e-05
GNL3L	1.2156	0.000886044	0.00237914
PPID	1.21535	5.40033e-07	3.44244e-06
WDR53	1.21504	4.84975e-07	3.12016e-06
AASDHPPT	1.21377	0.000125993	0.000419773
SLC7A6OS	1.2115	3.51413e-05	0.000136367
PNPLA4	1.21075	0.000216036	0.000678126
KDM4D	1.20967	7.98716e-07	4.8547e-06
CRACR2A	1.20949	6.07443e-05	0.000219785
UBE2C	1.20929	0.00860484	0.017858
ZNF584	1.2092	2.76734e-06	1.44995e-05
CLNS1A	1.20892	3.89233e-05	0.000148656
ZNF66	1.20825	7.07856e-10	9.99079e-09
WNK4	1.20803	0.196495	0.265495
CDK5	1.20737	0.00303497	0.00707052
PSEN2	1.2065	0.0162009	0.0311312
KIF22	1.20594	2.68491e-05	0.000108026
OGFOD1	1.20593	1.58194e-06	8.90274e-06
LCLAT1	1.20583	4.00096e-06	2.00412e-05
CCDC77	1.20552	6.37884e-07	3.99121e-06
C1orf109	1.20543	5.9811e-05	0.000216752
PHF19	1.20332	0.000968244	0.00257805
TOP3A	1.20288	2.81559e-06	1.47232e-05
FKTN	1.20288	0.00011729	0.000393491
TMEM98	1.2019	0.0317755	0.0558259
STRAP	1.20189	1.55656e-07	1.13462e-06
TKFC	1.20121	0.000330043	0.000996754
RARS	1.20067	1.41187e-07	1.04105e-06
C1orf216	1.19896	2.32477e-05	9.50225e-05
SHMT1	1.19875	0.0018778	0.00464903
UBE3B	1.19862	2.03299e-08	1.89283e-07
SCMH1	1.1985	1.22775e-05	5.40026e-05
KIF24	1.19832	9.29956e-07	5.55293e-06
DCAF4	1.19809	7.79586e-06	3.62285e-05
TIMM8A	1.19804	5.73413e-07	3.62623e-06
LIG1	1.19788	0.000354461	0.00105926
ZNF765	1.19748	6.14574e-08	5.0551e-07
KARS	1.19692	1.05688e-06	6.2269e-06
FANCC	1.19649	2.10817e-07	1.49238e-06
CENPF	1.19586	0.00556578	0.0121451
ACAD10	1.19417	0.000106869	0.000362651
BMS1	1.19357	8.09674e-07	4.9082e-06
POLH	1.19253	0.000782119	0.00212794
ART3	1.19198	0.0389883	0.0665551
VTA1	1.19151	1.65477e-05	7.02846e-05
DAZAP2	1.19131	1.13802e-06	6.64116e-06
VPS33A	1.19083	8.59312e-07	5.16592e-06
TMEM45A	1.19077	0.0987471	0.14781
AIFM2	1.19047	0.00207397	0.00507248
FAH	1.19042	0.0091537	0.0188523
ERO1A	1.19033	0.001309	0.0033673
IQCB1	1.19029	0.00257998	0.00613144
ZNF429	1.18977	0.000106484	0.000361574
ANAPC15	1.18849	0.00047618	0.00137409
DCTPP1	1.18786	1.98292e-05	8.25302e-05
ZNF883	1.18729	0.00318482	0.00738403
C14orf1	1.18727	0.00066199	0.001841
ANXA6	1.1855	0.0296488	0.0525234
ZNF749	1.18548	0.0176779	0.0335929
EDN3	1.18511	0.0453484	0.0756788
GHITM	1.18434	0.00123555	0.00320315
UNG	1.18388	0.000116509	0.000391364
CCT3	1.18312	1.74539e-05	7.37021e-05
PHLDB1	1.18281	0.00898069	0.0185367
RAE1	1.182	1.33981e-05	5.84162e-05
ZNF613	1.18032	3.67768e-06	1.86444e-05
ITGA5	1.17971	0.0409161	0.0693045
IFT52	1.17929	3.25501e-06	1.67357e-05
KIF11	1.17928	0.00138923	0.00355135
SLC43A1	1.17923	0.0198321	0.037055
SGO1	1.17918	0.00018924	0.000602434
PRPF6	1.17917	0.000335232	0.00100956
UBR4	1.17819	3.53564e-05	0.000136902
CEND1	1.17688	0.0448864	0.0750256
SLC25A26	1.17688	1.23985e-06	7.17245e-06
WFS1	1.17649	0.0139016	0.0272278
ZNF394	1.17644	8.08832e-07	4.90683e-06
ARAP1	1.17581	0.000319541	0.000968522
USP4	1.17528	1.2511e-07	9.43444e-07
FAM86B1	1.17466	0.00141869	0.00361564
EIF2B3	1.17425	2.98941e-07	2.03492e-06
ZNF287	1.17417	0.00543377	0.0118782
ANAPC1	1.17399	1.49416e-06	8.45645e-06
TMEM209	1.17364	0.000728002	0.00199981
ECHDC1	1.17308	0.000187949	0.000598682
DOLPP1	1.17296	4.6216e-05	0.000172623
VPS39	1.17195	2.16445e-05	8.90628e-05
PLPP7	1.17031	0.0628699	0.100352
UGT2B7	1.16998	0.0944892	0.142412
SF3B2	1.16871	2.28523e-06	1.22759e-05
GAS2	1.16766	0.0276002	0.0494046
RFTN2	1.16743	0.0585325	0.0944491
MYH10	1.16682	0.112747	0.165724
P4HA1	1.16651	0.00559005	0.0121947
FKBP15	1.16567	1.06749e-05	4.7824e-05
AP3M1	1.16521	8.76931e-06	4.01671e-05
ZNF665	1.16492	3.10811e-07	2.10137e-06
VRK3	1.16378	1.50891e-06	8.52787e-06
PPP1R11	1.16306	0.00125509	0.0032459
SAA2	1.16302	0.0723544	0.11308
NTHL1	1.16255	0.000452431	0.00131245
LDLRAP1	1.16223	0.000898012	0.00240834
CENPQ	1.16192	0.00141736	0.00361282
FAM98A	1.16169	8.59013e-06	3.94483e-05
INTS13	1.16081	5.99282e-05	0.000217128
IFNAR1	1.15902	1.90992e-05	7.98787e-05
SNAP47	1.15875	1.64354e-05	6.99196e-05
MINDY4	1.15816	0.00174589	0.00436036
SSB	1.15798	4.91393e-05	0.000181838
TMEM104	1.15667	0.00048835	0.00140438
C15orf41	1.15659	1.09262e-05	4.86903e-05
PSMB7	1.15612	0.000375451	0.0011122
ANTXR1	1.15604	0.0503856	0.083008
FGFBP2	1.15544	0.25708	0.333104
PMS2	1.1552	4.52144e-05	0.000169358
METTL13	1.1549	1.79008e-05	7.54294e-05
TSPAN31	1.1531	0.000291909	0.00089206
ECI2	1.15295	0.00213973	0.00521255
VPS18	1.15287	0.0100618	0.0204977
FAM24B	1.15283	0.00370176	0.00842698
ABCC10	1.1526	0.000577399	0.00163453
GJB1	1.15154	0.226874	0.299836
ADAM23	1.15033	0.199852	0.269345
TTC23	1.15017	1.50266e-06	8.49557e-06
GEMIN7	1.14931	9.97545e-05	0.00034151
CCT8	1.14864	8.09638e-07	4.9082e-06
PASK	1.14722	5.42485e-06	2.62026e-05
PSMD14	1.14618	8.04011e-06	3.72117e-05
XPNPEP1	1.14613	0.00065668	0.00182877
ZNF586	1.1447	3.51588e-06	1.79038e-05
PSMD11	1.14439	2.56883e-06	1.35663e-05
ZNF724	1.1439	2.40712e-05	9.81872e-05
TUB	1.14323	0.0487113	0.0805743
NAMPT	1.1422	0.0054413	0.0118914
LAMA1	1.14191	0.183891	0.25106
C11orf58	1.14171	3.12523e-05	0.000123133
RBBP5	1.1414	7.72251e-06	3.594e-05
TOR1AIP1	1.1411	0.000574819	0.00162867
ARF1	1.13794	0.000213582	0.000671611
SMARCC2	1.13729	3.39811e-06	1.73874e-05
PNO1	1.13724	5.70896e-07	3.61461e-06
CD22	1.13709	0.123727	0.179107
ELP5	1.13686	4.51923e-06	2.23011e-05
C6orf89	1.13613	2.08163e-05	8.61664e-05
FIP1L1	1.1359	2.46059e-06	1.30988e-05
SEC31B	1.13429	0.017268	0.0329632
CCDC94	1.13298	0.00344933	0.00792814
THAP4	1.13292	0.000591187	0.00167
PDE4B	1.13244	0.0432944	0.0727037
PIGN	1.13233	6.80799e-06	3.21435e-05
ALG1	1.13186	0.00140342	0.00358299
ZNF436	1.13179	1.91284e-05	7.99683e-05
SDSL	1.13166	0.0188872	0.0355646
ZNF557	1.13083	4.20232e-07	2.75022e-06
ARL6IP1	1.13076	2.34201e-06	1.25432e-05
DPYSL2	1.13063	0.0379048	0.0649907
DRG1	1.13008	0.000212797	0.000669673
CCT2	1.12925	9.65438e-07	5.74973e-06
TDRKH	1.12789	0.010264	0.0208631
SGCB	1.12748	0.0111695	0.0224757
METTL2B	1.12744	9.87675e-06	4.46751e-05
SENP1	1.12709	4.40989e-07	2.87015e-06
VRK1	1.12574	3.52053e-05	0.000136549
ACCS	1.12566	0.00239043	0.00572964
URM1	1.12511	0.0010211	0.00270344
ZNF221	1.12508	3.58888e-07	2.39394e-06
NCBP1	1.12464	0.000357514	0.00106719
SPTY2D1	1.12458	1.3754e-05	5.98043e-05
LURAP1	1.12441	0.0226419	0.0416127
GAS8	1.12426	0.00217834	0.00529447
UBE2T	1.12401	0.00284986	0.00668713
CDC27	1.12378	2.90635e-05	0.000115623
POLR2A	1.12219	0.0034018	0.00783697
MARCH3	1.12211	0.0240046	0.0438243
FRMD8	1.12168	0.000553808	0.00157501
ZNF367	1.12132	0.00879976	0.0182127
TMUB2	1.12125	4.06182e-07	2.67142e-06
MPDU1	1.12097	0.00274126	0.00646656
TBK1	1.12093	0.000359944	0.00107304
UTP11	1.12076	1.66722e-05	7.07571e-05
PTPRZ1	1.12074	0.167719	0.232262
LRR1	1.11958	2.0408e-05	8.46302e-05
STX17	1.11934	4.89567e-05	0.000181295
ZNF254	1.11888	0.000898499	0.00240889
NKIRAS2	1.11853	3.54263e-05	0.000137107
CLCN6	1.1184	3.11888e-06	1.61346e-05
KLHL22	1.11837	0.00209325	0.00511494
SPIN2B	1.11821	3.42071e-06	1.74846e-05
ACAD11	1.11799	0.000838199	0.0022643
XRCC5	1.11762	6.6996e-07	4.15928e-06
CDH15	1.1176	0.0585402	0.0944519
RNASEL	1.11727	0.00143743	0.0036558
TIPARP	1.11698	0.000476973	0.00137588
VDAC1	1.11515	0.000836463	0.00226072
YME1L1	1.11476	0.000103414	0.000352201
YIPF5	1.11448	7.83504e-06	3.63576e-05
TIMM21	1.11278	1.35274e-08	1.31608e-07
IDH3G	1.11243	0.00118956	0.00309548
STXBP1	1.11207	0.0232794	0.042637
MAGEA12	1.11206	0.403969	0.484247
AP1G1	1.11131	1.802e-05	7.58114e-05
NASP	1.11109	0.000737172	0.00202256
MAPRE2	1.11061	8.73065e-05	0.0003033
IGFBP3	1.11024	0.170546	0.235377
TMPPE	1.11005	0.00010521	0.000357706
SLC33A1	1.1092	1.99887e-05	8.31507e-05
TTC27	1.10907	6.56306e-06	3.11809e-05
PSMB1	1.10904	0.000629905	0.00176438
SLC39A10	1.10768	0.00255056	0.00606786
METAP1	1.10611	1.11577e-05	4.96385e-05
ZBTB33	1.10581	0.000271849	0.000835398
DDIT4L	1.10576	0.0554121	0.090116
PAGE1	1.10572	0.0954285	0.143516
C10orf107	1.10569	1.11e-05	4.94093e-05
SEC24A	1.10526	0.000393425	0.00115834
TRPV4	1.1044	0.137495	0.196005
PPEF1	1.10391	0.0160828	0.0309526
NOL10	1.10322	1.35189e-06	7.74191e-06
TRAF2	1.10261	3.47806e-05	0.000135099
BNIP3	1.10256	0.00642587	0.0138028
PTCD2	1.10233	2.52027e-07	1.7431e-06
ZNF816	1.10205	0.00169221	0.00424022
TRO	1.10182	0.0246704	0.0448653
DNMT1	1.10164	0.000213638	0.000671611
RHNO1	1.10142	5.06397e-05	0.000186827
DCAKD	1.1014	0.00110671	0.00290501
MOB3A	1.1013	0.00047925	0.0013817
ACY1	1.10113	0.00487868	0.010789
INTS4	1.10112	0.000139654	0.000459339
NOMO2	1.10099	0.00201851	0.00494747
GMNN	1.10063	0.00345117	0.00793007
HIRIP3	1.10052	6.40553e-06	3.05052e-05
NAXD	1.09951	0.000137062	0.00045212
ZNF22	1.09901	0.0498968	0.0823132
POLR3A	1.09808	3.02389e-05	0.000119613
FBXO6	1.09739	0.0192111	0.0360638
TBC1D13	1.0963	0.000110289	0.000373145
EPS15L1	1.09555	7.22429e-05	0.000256102
RSL1D1	1.0955	2.61505e-06	1.37921e-05
RNGTT	1.09541	0.000211859	0.000666983
ZNF888	1.09508	0.00274568	0.00647123
RPF2	1.09502	0.000211817	0.000666983
ZNF441	1.09488	0.00127148	0.00328296
DNAJB11	1.09441	0.000378066	0.0011187
TMED10	1.09415	0.00110906	0.0029088
CUL9	1.09337	0.000264482	0.000815115
THOC6	1.09204	0.000926694	0.00247693
NUP62	1.09197	7.28431e-07	4.48735e-06
FICD	1.0915	0.000379533	0.001122
ABR	1.09129	0.000898519	0.00240889
FDCSP	1.09047	0.370544	0.451716
DFFA	1.09016	0.000149658	0.00048722
FAM81A	1.09008	0.0425465	0.0716779
TMEM107	1.09004	0.00134438	0.0034483
NEU1	1.0899	0.00153727	0.00388556
PPP1R10	1.08977	6.99331e-05	0.000249132
SGCE	1.08963	0.0636408	0.10147
DUSP10	1.08924	0.0974353	0.146179
PFKM	1.08893	0.00262398	0.00622211
TWF2	1.08821	0.00128663	0.00331564
CAP1	1.0881	6.96137e-05	0.000248105
EIF2D	1.08735	0.00037449	0.00111038
SUPT6H	1.08728	3.86206e-06	1.94309e-05
DAAM2	1.08726	0.0280686	0.0500858
FAM134C	1.08706	2.86013e-05	0.000114109
FASTKD5	1.08701	0.000299058	0.000911985
FASTKD3	1.08652	1.88219e-05	7.87902e-05
FAM104A	1.08645	2.22022e-06	1.19861e-05
STK24	1.08565	0.010544	0.0213734
PLSCR1	1.08541	0.019322	0.0362251
ZNF71	1.08444	0.000772829	0.00210734
COG2	1.0844	9.13916e-05	0.000315977
TMX1	1.08435	0.00171147	0.00428378
NAA60	1.08369	0.00012641	0.000420902
EXD2	1.08368	8.77333e-05	0.00030465
ARPC1A	1.08367	0.000373967	0.00110904
OAT	1.0834	6.06055e-05	0.000219403
POLR1E	1.08292	0.000360165	0.00107329
LPCAT2	1.0822	0.0339794	0.0591699
LAMP2	1.08153	0.000362254	0.00107891
SLC35B2	1.081	0.00474748	0.0105178
NXF1	1.08019	6.69294e-06	3.17035e-05
MRPL19	1.07986	2.45223e-06	1.3063e-05
BFSP1	1.07978	0.0190005	0.0357315
TYK2	1.07952	0.000330171	0.000996951
PTPRR	1.07837	0.00759719	0.0160253
ZNF805	1.07775	3.07893e-06	1.59383e-05
SLC25A40	1.07731	0.00765034	0.0161161
IQCK	1.07693	0.0125417	0.024876
DCAF8	1.07671	3.18088e-07	2.14511e-06
ASNA1	1.07669	0.000711977	0.00196221
PRMT3	1.07638	0.000529399	0.0015099
C9orf116	1.07532	0.0189877	0.0357183
NUDCD3	1.07477	0.000184031	0.000587491
LYSMD3	1.07437	0.00147307	0.00373632
SNX2	1.07399	0.000157799	0.000511222
ATP7A	1.07389	0.00278535	0.00655215
OTUB1	1.07388	0.00245036	0.00585919
AGPAT5	1.07291	0.00322964	0.00747599
METTL3	1.07271	2.08281e-05	8.61929e-05
CTTN	1.07238	0.00200548	0.00491857
MOB2	1.07225	0.00525812	0.0115369
METTL18	1.07207	2.6512e-05	0.00010694
ABCG5	1.07126	0.000819046	0.00222046
PEX12	1.07121	0.000258407	0.000799328
BTD	1.07101	0.00447539	0.00997876
EFCAB9	1.07075	5.18613e-09	5.6926e-08
POLR2C	1.07065	3.80166e-05	0.000145612
SLFN5	1.07056	0.0060218	0.0130155
DNM1L	1.07051	4.49968e-05	0.00016878
MRPS10	1.07035	2.172e-06	1.17587e-05
[truncated: 13,950 more rows]

## Sheet: CTC.vs.TCGA.Met
Gene	Log2FoldChange	P value	FDR-adjust P value
F2RL2	6.67737	1.45388e-12	2.27288e-11
UCN2	6.28741	2.7845e-07	1.57046e-06
MAGEC2	5.83965	0.000152158	0.000476466
FCRLA	5.8126	1.57996e-07	9.37717e-07
TF	5.58103	6.62213e-06	2.80139e-05
SPATS1	5.52981	2.54804e-12	3.81658e-11
PCDHGC3	5.44481	3.25816e-12	4.78178e-11
IL1B	5.33347	2.13908e-22	1.69616e-20
DCT	5.22745	0.000875915	0.00229378
LOXL3	5.09647	9.53791e-07	4.80949e-06
CYTL1	5.01658	1.21713e-05	4.83357e-05
ICAM1	4.98847	5.88554e-14	1.16672e-12
LPXN	4.74668	1.36373e-12	2.1525e-11
HMGCS1	4.71156	1.06947e-20	6.75217e-19
CD70	4.53353	2.9885e-16	9.09101e-15
PAEP	4.52166	0.00395259	0.00899005
FABP7	4.51379	4.32026e-05	0.00015314
CYP51A1	4.49318	4.66028e-12	6.69855e-11
IL24	4.43751	1.58247e-10	1.67678e-09
ITIH5	4.32207	0.000206627	0.000625037
ANGPTL2	4.31769	1.64599e-08	1.18601e-07
FDPS	4.31511	7.65785e-29	1.26855e-26
ACAT2	4.30162	2.81041e-16	8.59615e-15
SERPINB2	4.28858	2.18903e-10	2.25244e-09
CCDC86	4.28165	9.62375e-31	1.87227e-28
NQO1	4.27035	1.42719e-07	8.56777e-07
FADS2	4.26964	6.99491e-08	4.48914e-07
SHCBP1	4.19748	4.32645e-21	2.88389e-19
C17orf53	4.16292	3.43289e-22	2.63467e-20
APOBEC3B	4.15328	9.78269e-15	2.25757e-13
CD36	4.14099	6.01557e-09	4.69433e-08
TUBA1B	4.07675	1.93683e-22	1.5431e-20
TYRP1	4.06526	0.0400586	0.0691805
QPCT	3.98689	0.000330047	0.000953049
ACO2	3.98029	2.25779e-18	9.68591e-17
KIFC1	3.95274	4.60757e-15	1.12539e-13
TUBA1C	3.91494	5.05719e-18	2.06371e-16
IL1RAPL1	3.91311	2.2691e-16	7.04347e-15
PFKFB4	3.89423	1.32426e-09	1.17601e-08
PLK1	3.89379	2.37768e-14	5.09359e-13
NCAPG	3.86778	7.73241e-17	2.54667e-15
TK1	3.86681	1.77448e-11	2.25428e-10
MSN	3.85795	1.00574e-22	8.24854e-21
SLC22A18AS	3.80662	2.8078e-09	2.3337e-08
IGF2BP3	3.79535	1.86973e-08	1.33428e-07
SPAG5	3.7918	4.88179e-20	2.77814e-18
LDLR	3.7756	4.6931e-06	2.04747e-05
BECN1	3.77422	1.16309e-28	1.88929e-26
BIRC5	3.77365	2.17249e-15	5.68825e-14
SLC43A3	3.7734	2.77661e-12	4.10906e-11
RACGAP1	3.74541	3.47325e-24	3.30176e-22
NCAPG2	3.73497	8.56127e-25	8.78765e-23
DHCR7	3.72362	2.00183e-05	7.55996e-05
FAP	3.72299	2.73086e-09	2.27427e-08
EEF2KMT	3.71357	4.0664e-29	6.94235e-27
PCDHGA12	3.69539	0.000499648	0.00138657
PFKP	3.69528	3.61639e-07	1.98902e-06
SLAMF9	3.69015	0.000141094	0.000446585
TMEM97	3.67348	3.07181e-15	7.79886e-14
M6PR	3.66099	5.93e-19	2.851e-17
FEN1	3.6592	3.38339e-20	1.98623e-18
PDIA6	3.59179	9.14068e-22	6.70757e-20
ETFB	3.5752	9.50898e-11	1.05641e-09
CDCA5	3.57367	5.37943e-17	1.8368e-15
HMGCR	3.57135	4.89331e-19	2.41504e-17
HSD17B12	3.56331	3.31469e-12	4.86049e-11
PMAIP1	3.55656	1.45621e-09	1.2823e-08
KRT27	3.52497	2.03757e-17	7.45965e-16
RNF26	3.51535	5.11801e-20	2.90269e-18
AIMP2	3.49192	1.54721e-22	1.23858e-20
PI3	3.47977	1.21895e-07	7.44265e-07
EME1	3.45366	1.67138e-18	7.35892e-17
ARHGEF3	3.45136	1.15969e-15	3.18079e-14
RFC3	3.44173	1.77953e-19	9.33331e-18
KIF2C	3.43225	1.25275e-14	2.84393e-13
CYB561A3	3.42921	1.95375e-09	1.67632e-08
DDOST	3.42336	2.70936e-25	3.02202e-23
ASF1B	3.41282	6.21385e-12	8.7072e-11
GBA	3.40348	3.51469e-10	3.50026e-09
PYCR1	3.40148	1.58151e-13	2.94658e-12
AKR1B1	3.36793	1.90475e-10	1.98557e-09
MAT2A	3.36314	1.5e-22	1.20656e-20
FN1	3.35259	7.88448e-05	0.00026319
PRMT5	3.35118	2.26322e-24	2.21438e-22
DNAJC14	3.34317	1.53912e-33	3.67872e-31
CYP1A1	3.32417	1.10984e-08	8.29333e-08
PHB	3.32272	7.58893e-24	6.86327e-22
CDK4	3.3203	4.45649e-17	1.54372e-15
RAD54L	3.31557	6.84493e-14	1.34101e-12
CDC20	3.30947	5.30545e-10	5.11322e-09
LPL	3.29802	0.000178426	0.000548959
CCT5	3.29517	7.07274e-25	7.34994e-23
HYOU1	3.28999	9.09247e-13	1.47839e-11
GAPDH	3.26988	6.43199e-12	8.99028e-11
PLAT	3.25251	2.64454e-05	9.76081e-05
IDH3A	3.24918	1.69262e-26	2.1784e-24
DDIAS	3.24661	6.43533e-15	1.5294e-13
SEC24C	3.24549	3.43577e-19	1.74194e-17
BORA	3.24419	1.05717e-24	1.0785e-22
TYR	3.22994	0.0100139	0.0204196
NCAPH	3.2265	9.33185e-14	1.78844e-12
COPG1	3.21108	4.88504e-18	1.99833e-16
PBK	3.20296	2.53645e-12	3.80263e-11
SLC2A6	3.20177	4.0527e-08	2.71766e-07
EXO1	3.1976	9.97006e-13	1.6148e-11
CDC6	3.19685	3.20031e-14	6.68469e-13
TMEM246	3.19614	1.54862e-05	5.98246e-05
SUMF2	3.1951	1.04211e-15	2.89626e-14
VPS52	3.19375	4.78379e-22	3.63807e-20
SHC1	3.186	3.99252e-13	7.00933e-12
EFTUD2	3.18483	1.26347e-25	1.49923e-23
PGM1	3.17621	4.55055e-09	3.64109e-08
MMP3	3.17532	2.61695e-12	3.90581e-11
NSDHL	3.16418	8.70638e-21	5.58109e-19
ORC1	3.15509	1.01087e-13	1.92411e-12
NOC2L	3.1499	9.07403e-19	4.20547e-17
KBTBD4	3.14334	8.0997e-27	1.08413e-24
DTL	3.14042	5.58607e-13	9.54652e-12
KIF20A	3.13295	1.24091e-11	1.63221e-10
MUL1	3.13142	1.51602e-23	1.31423e-21
NUDT22	3.11721	4.09865e-14	8.41405e-13
EMC1	3.10636	2.08165e-20	1.25733e-18
DFNA5	3.10489	4.67138e-05	0.000164437
SPTLC1	3.1045	6.37043e-29	1.0766e-26
SKA3	3.09519	1.15821e-13	2.17975e-12
CDC45	3.07582	5.261e-11	6.11263e-10
MRPS18A	3.05963	4.52344e-18	1.86408e-16
PAGE5	3.0521	0.0257579	0.0470167
STK26	3.04947	7.0669e-07	3.66738e-06
PGAM1	3.04434	2.82125e-17	1.00644e-15
C8orf48	3.04256	9.15048e-10	8.3568e-09
DNAJC11	3.04009	6.03841e-22	4.53043e-20
CDCA8	3.01028	1.12112e-11	1.49224e-10
PLOD1	3.00944	2.15539e-12	3.28731e-11
FOXM1	3.00015	2.3316e-09	1.9782e-08
KCTD11	2.99648	1.96235e-14	4.30303e-13
RRM2	2.99304	8.18359e-10	7.58406e-09
MCAM	2.99239	6.69686e-05	0.000227688
SLC39A7	2.99058	6.4434e-17	2.15179e-15
COL19A1	2.98396	1.20435e-07	7.36748e-07
CT55	2.98192	1.96768e-08	1.39912e-07
TNFRSF10B	2.97427	2.03359e-05	7.65789e-05
MCM2	2.96109	1.1791e-10	1.2877e-09
RNF40	2.95782	4.60217e-23	3.86929e-21
THBS2	2.95529	0.00906595	0.0186893
GPNMB	2.95471	1.33958e-05	5.25745e-05
TFRC	2.95032	4.63523e-07	2.48883e-06
MAGEA1	2.94849	0.00990878	0.0202323
GPI	2.94802	8.42637e-11	9.43021e-10
CPVL	2.94637	0.000294236	0.000860189
AURKA	2.93334	3.61944e-14	7.49466e-13
KIF18B	2.92953	2.24438e-11	2.8023e-10
PC	2.92917	5.4438e-10	5.22548e-09
ABCB6	2.92916	2.59446e-09	2.17692e-08
BUB1B	2.92547	5.55616e-12	7.87131e-11
CCNB1	2.92115	1.39806e-14	3.14818e-13
KRT79	2.91667	9.09654e-14	1.74735e-12
TPX2	2.912	1.88496e-12	2.89333e-11
SKA1	2.90697	5.29497e-13	9.11422e-12
TUBB4B	2.90117	1.51034e-10	1.60543e-09
MMP8	2.89432	0.00099967	0.00258109
CAPG	2.89296	0.0116559	0.0233382
ENO1	2.89202	1.0721e-12	1.72474e-11
KRT12	2.89015	4.76118e-12	6.82599e-11
FAM64A	2.8851	2.11295e-09	1.80274e-08
NUP188	2.88461	7.80736e-18	3.08294e-16
NUBP1	2.87937	2.73088e-22	2.11529e-20
GALM	2.8791	5.6995e-06	2.45074e-05
AARS	2.87891	3.18746e-13	5.66731e-12
ACTL6A	2.87134	1.84721e-29	3.28783e-27
HMGN4	2.86714	4.38088e-21	2.90859e-19
ACP5	2.8619	6.04411e-05	0.000207519
HJURP	2.8605	8.39542e-12	1.15229e-10
FGL2	2.85896	8.91459e-05	0.000294356
CLPB	2.84028	1.01603e-13	1.93173e-12
MAGEA10	2.83962	0.0135673	0.0266581
C19orf57	2.83603	1.32939e-09	1.17932e-08
SLC16A1	2.82817	2.86435e-16	8.74516e-15
AURKB	2.82452	1.12087e-07	6.90981e-07
AGMO	2.81841	0.00133082	0.00335988
MCM5	2.81012	1.49693e-09	1.31402e-08
RFT1	2.80822	2.06381e-24	2.04317e-22
CTSV	2.80572	8.94863e-10	8.19931e-09
PIGS	2.80135	1.47774e-17	5.55597e-16
PPIB	2.79907	1.32825e-15	3.61348e-14
IARS	2.78684	8.82819e-19	4.1029e-17
SLC20A1	2.7822	3.80615e-05	0.000136245
SUV39H1	2.77789	2.50706e-15	6.4831e-14
RECQL	2.77735	3.70213e-11	4.43064e-10
SLCO4A1	2.76627	0.000310175	0.000900024
FANCB	2.76615	2.31958e-20	1.391e-18
ACLY	2.7653	6.39742e-19	3.05815e-17
PLA2G4A	2.76388	2.02339e-05	7.6229e-05
G6PC3	2.76244	6.60475e-12	9.22405e-11
CDKN1A	2.76242	5.33302e-05	0.000185967
RAB36	2.75636	1.34384e-06	6.58603e-06
RP11-27I1.4	2.75473	1.87739e-18	8.17986e-17
CNOT1	2.74945	3.94526e-20	2.28402e-18
OCA2	2.73771	0.0437499	0.0747071
PPP1CA	2.72782	9.03673e-15	2.097e-13
PNPO	2.72385	1.57331e-14	3.50973e-13
PARP4	2.72168	4.32176e-11	5.08594e-10
DOLK	2.70642	1.10905e-14	2.54533e-13
RFC5	2.70405	4.04359e-20	2.32486e-18
ABCF2	2.70212	5.17444e-22	3.89971e-20
SNAI1	2.69351	0.000122821	0.000393362
FANCI	2.69189	7.89812e-14	1.54193e-12
PKM	2.68614	1.57673e-11	2.02613e-10
P3H2	2.68501	0.00288908	0.00678417
PLIN3	2.68311	1.3349e-14	3.01001e-13
MCM7	2.68051	1.53948e-11	1.98284e-10
DPP3	2.67394	5.56767e-14	1.11219e-12
PDHA1	2.6666	4.47132e-20	2.55323e-18
ADGRE5	2.66532	6.79517e-10	6.40146e-09
EMP3	2.66299	7.71201e-07	3.96848e-06
ATG101	2.66012	8.69881e-14	1.68254e-12
TMEM173	2.65436	5.9741e-10	5.68236e-09
NDC80	2.65414	9.08024e-12	1.23313e-10
USP11	2.65233	1.88026e-10	1.96494e-09
BIN3	2.65194	1.578e-09	1.37795e-08
KPNA2	2.64938	1.2338e-09	1.09977e-08
CALR	2.64545	5.38564e-14	1.07954e-12
ASB9	2.64222	6.83721e-06	2.88654e-05
TFIP11	2.63508	3.0351e-16	9.21602e-15
COL15A1	2.63216	5.41837e-05	0.000188707
RP11-398C13.8	2.62402	1.9852e-15	5.23887e-14
FAM53C	2.62101	2.89444e-17	1.03036e-15
CNDP2	2.62078	2.74818e-13	4.96007e-12
DEPDC1	2.61704	5.11568e-10	4.94457e-09
BUB1	2.61646	4.15436e-11	4.90866e-10
CLP1	2.61052	6.16044e-25	6.44189e-23
TRPV2	2.6086	0.000412059	0.00116838
TNFRSF14	2.60772	0.000114778	0.000369724
GSN	2.60671	2.09199e-07	1.20986e-06
COPA	2.60658	2.01849e-15	5.31831e-14
MCM3	2.60599	5.37556e-12	7.63485e-11
PTGS2	2.60585	2.69215e-06	1.23641e-05
GAPDHS	2.60195	0.0256085	0.046785
HSPA5	2.60074	8.50692e-13	1.39402e-11
TMEM231	2.60023	2.82675e-14	6.00485e-13
RPN1	2.59693	1.31972e-18	5.91964e-17
WDR63	2.59645	0.000235043	0.000701232
IL1RAP	2.59108	0.000106696	0.000346763
ZNF473	2.58813	1.04355e-20	6.6135e-19
MAN1B1	2.58808	1.72568e-11	2.19562e-10
SLC24A5	2.5805	0.00188439	0.00460529
C1GALT1C1L	2.57815	7.86763e-06	3.27039e-05
RXRG	2.57395	0.0207673	0.0389832
SPC25	2.56838	1.99673e-11	2.50993e-10
AUNIP	2.56803	1.31742e-10	1.41657e-09
SPAG4	2.5672	7.42026e-06	3.10526e-05
GANAB	2.56147	1.69854e-14	3.75903e-13
SSX1	2.55979	0.0064424	0.0138243
CENPM	2.55804	1.77249e-06	8.4585e-06
CERS2	2.55643	1.47241e-15	3.96697e-14
CALU	2.55433	1.40637e-10	1.50447e-09
MAD2L1	2.55035	1.2434e-12	1.97751e-11
C10orf90	2.54597	6.49922e-05	0.000221373
ARSE	2.54366	2.85566e-05	0.000104776
SAE1	2.54012	8.65695e-17	2.83999e-15
PLAUR	2.54006	0.000196552	0.00059815
PABPC5	2.53982	1.16286e-09	1.04264e-08
KIRREL	2.53504	1.59174e-09	1.38922e-08
SPP1	2.53046	0.0297973	0.0533996
GAL3ST4	2.52485	1.58878e-05	6.12061e-05
ACOT8	2.5103	2.60412e-13	4.73068e-12
ABCF3	2.50738	4.96812e-15	1.20292e-13
NAPA	2.50713	9.18508e-13	1.492e-11
SCD	2.5061	3.44974e-06	1.55009e-05
COPB2	2.50588	1.27433e-18	5.73139e-17
TMEM177	2.50445	8.69624e-11	9.69978e-10
STC2	2.50036	2.40863e-09	2.03529e-08
NCR3LG1	2.49834	6.72329e-08	4.32619e-07
TAF6	2.49723	7.40714e-15	1.74548e-13
BOLA2	2.49687	1.31748e-14	2.97875e-13
C1orf112	2.49668	9.61495e-17	3.12364e-15
PSME3	2.49312	6.94594e-22	5.165e-20
STK32B	2.49289	0.000290483	0.00085011
ZFP82	2.49202	1.88241e-10	1.96596e-09
WDR74	2.48887	1.19336e-16	3.82492e-15
ALDOA	2.48307	4.171e-09	3.35828e-08
SEC61A1	2.48278	1.03558e-16	3.33198e-15
MTFR2	2.4818	2.86142e-13	5.13123e-12
RAD51	2.48023	3.6745e-11	4.40072e-10
PSMC3IP	2.47993	2.42453e-14	5.18732e-13
LDHA	2.4794	2.17217e-08	1.53086e-07
ZNF521	2.47613	0.000143224	0.000452308
SND1	2.47593	1.64757e-11	2.11069e-10
PTTG1	2.47566	2.84979e-08	1.96699e-07
CKS1B	2.47381	2.21753e-15	5.78807e-14
NOV	2.47293	0.0130831	0.025822
ADAM17	2.46954	5.00225e-12	7.14711e-11
APOLD1	2.46896	0.00029532	0.000862755
IDI1	2.46738	3.34538e-11	4.02098e-10
C6orf223	2.4645	7.82883e-09	6.01673e-08
MAGEC1	2.46368	0.0444621	0.0756915
RFC2	2.45795	2.47449e-14	5.28744e-13
MSMO1	2.45794	1.7817e-07	1.04779e-06
TPI1	2.45557	4.50975e-10	4.40214e-09
NCSTN	2.45245	1.12664e-14	2.58216e-13
MILR1	2.45066	3.1557e-07	1.75818e-06
TMCO4	2.44943	3.67176e-07	2.01748e-06
C19orf48	2.44838	9.53349e-09	7.20437e-08
STIP1	2.44632	3.52313e-15	8.86399e-14
PSMD2	2.44565	4.15344e-13	7.24622e-12
MASTL	2.44363	1.1376e-12	1.81961e-11
HARS	2.44121	1.90536e-18	8.28014e-17
KCNE4	2.43891	7.67351e-05	0.000256822
RCC1	2.43464	8.8244e-13	1.43759e-11
KIF4A	2.43214	2.35653e-10	2.41145e-09
ZNF468	2.42967	5.13084e-12	7.30588e-11
STT3A	2.4285	6.42584e-15	1.52931e-13
SAAL1	2.42739	5.43776e-18	2.2136e-16
HS6ST2	2.42722	0.000730338	0.00195216
CCNE2	2.42674	6.9481e-12	9.66323e-11
FAM162A	2.42225	1.02642e-15	2.86695e-14
EBP	2.41877	1.60247e-08	1.15914e-07
TIMELESS	2.41266	6.84862e-11	7.81612e-10
GPX7	2.41191	0.00146558	0.00366582
GAGE12H	2.41148	1.41524e-32	3.03569e-30
MAGED1	2.40502	2.55056e-09	2.14332e-08
MELK	2.40393	3.4615e-09	2.82528e-08
DPH2	2.39854	5.33062e-13	9.16614e-12
FAM234A	2.39646	5.97834e-12	8.40535e-11
FBXW9	2.39442	1.31163e-11	1.71311e-10
RTP4	2.3942	6.12567e-05	0.000210104
NUSAP1	2.38883	5.00358e-09	3.97318e-08
EIF4H	2.38668	5.43947e-25	5.75998e-23
EXOSC2	2.38468	2.64708e-17	9.46332e-16
NRM	2.3809	1.51479e-08	1.1e-07
GOT1	2.37984	8.47332e-13	1.39111e-11
ITLN2	2.37982	4.60164e-06	2.01071e-05
ITGA4	2.378	0.00115966	0.00296037
S100A3	2.37749	2.34972e-05	8.75767e-05
ZDHHC4	2.37605	1.33306e-12	2.10808e-11
LCN1	2.37134	1.46565e-27	2.13411e-25
THTPA	2.36709	8.7642e-10	8.04354e-09
RFXANK	2.36646	2.47786e-14	5.28788e-13
CENPN	2.36625	4.05812e-13	7.09471e-12
YARS	2.36598	8.05348e-14	1.57043e-12
SAT1	2.36583	6.93821e-06	2.92696e-05
GNGT1	2.3644	1.9092e-17	7.00499e-16
EPHA3	2.36295	0.000708168	0.00189817
PGK1	2.36099	3.72708e-16	1.11953e-14
SCML1	2.35776	5.61903e-06	2.418e-05
ATG13	2.35734	1.28188e-13	2.40709e-12
LASP1	2.35308	5.83285e-13	9.91762e-12
PRC1	2.35286	3.09971e-10	3.10284e-09
ATP5B	2.35095	1.81116e-11	2.29564e-10
APEX2	2.34647	8.91796e-14	1.71699e-12
RRM1	2.34623	2.18704e-14	4.74597e-13
KYAT1	2.34393	4.04505e-13	7.07926e-12
TOP2A	2.34129	3.87379e-07	2.11736e-06
DKC1	2.338	1.42909e-22	1.16069e-20
DEPDC7	2.33352	1.0685e-06	5.34282e-06
WDR3	2.33309	1.27016e-10	1.37725e-09
MAN2C1	2.33295	3.70801e-15	9.26947e-14
RNASEH2A	2.33214	5.12152e-09	4.05601e-08
DYNLT3	2.33155	0.00401541	0.00911188
CD99L2	2.33152	5.79564e-08	3.78925e-07
ATG9A	2.32888	3.13e-13	5.57699e-12
TM9SF4	2.32652	1.53372e-17	5.7535e-16
NPTX1	2.32637	4.82638e-06	2.10232e-05
SOAT1	2.32396	4.32204e-07	2.33641e-06
LGALS3BP	2.32383	4.55729e-05	0.000160725
ARAF	2.32378	1.01906e-16	3.28514e-15
SLC12A8	2.32287	1.46459e-08	1.06679e-07
ECE1	2.32141	2.40288e-05	8.94185e-05
TCF19	2.31965	5.3813e-09	4.25092e-08
ZNF695	2.31924	7.19699e-13	1.20172e-11
POLA2	2.3186	5.53961e-13	9.48652e-12
NRCAM	2.3159	0.00175733	0.00432659
TTK	2.31512	1.45118e-09	1.27855e-08
UTP4	2.31502	1.2241e-16	3.91596e-15
BCHE	2.31431	0.00905437	0.0186746
ZNF257	2.3136	6.94198e-18	2.76539e-16
MTX1	2.31273	3.30595e-11	3.99364e-10
TOMM34	2.31122	9.51542e-14	1.81946e-12
LIPA	2.31042	4.28734e-10	4.20929e-09
TANGO2	2.30775	2.22336e-06	1.03792e-05
PES1	2.30607	6.003e-11	6.90958e-10
GEMIN4	2.30553	8.32376e-13	1.36802e-11
SH3TC2	2.30541	8.4003e-08	5.3056e-07
FANCA	2.30397	1.00783e-10	1.11153e-09
TBXAS1	2.30279	4.3096e-05	0.000152827
ZP3	2.29725	5.08877e-06	2.20799e-05
ME1	2.29646	0.000960182	0.00248912
CDC25C	2.29411	3.92477e-10	3.88093e-09
RBBP4	2.2936	1.46998e-18	6.52369e-17
ESPL1	2.29305	1.29434e-08	9.53569e-08
FOSL1	2.28861	0.00810556	0.016937
ITIH6	2.28852	0.0123675	0.0245777
TSR1	2.28786	5.25465e-14	1.05795e-12
ESYT1	2.2878	1.66278e-11	2.12529e-10
FNTB	2.28289	1.7897e-09	1.54239e-08
CTSL	2.27584	0.000578829	0.00158319
PRPF4	2.27367	2.17186e-16	6.77937e-15
CDCA7L	2.2728	0.00700222	0.0148767
GYS1	2.27186	5.19607e-08	3.42806e-07
PPME1	2.27088	3.13854e-12	4.62244e-11
CLCC1	2.27029	6.56605e-14	1.29091e-12
USP5	2.26654	2.95688e-13	5.29108e-12
AHRR	2.26653	7.28352e-06	3.05492e-05
NNT	2.26523	1.27619e-07	7.74462e-07
TBC1D4	2.26365	0.000286828	0.000840882
NR0B1	2.26292	0.000478531	0.00133305
GLA	2.26024	1.0258e-08	7.71114e-08
AIFM1	2.25865	1.01177e-12	1.63712e-11
SLC1A4	2.25636	0.00515574	0.0113573
TXLNA	2.25374	1.60499e-14	3.57565e-13
PNMA2	2.24631	0.00140991	0.00353529
FARSA	2.24375	4.47699e-12	6.44063e-11
MRPL49	2.24317	9.89686e-16	2.76897e-14
GPC6	2.24294	0.00340276	0.00784614
PMPCA	2.24203	1.47902e-11	1.91528e-10
CEP85	2.24202	1.0084e-11	1.35406e-10
SPARC	2.24186	1.37398e-06	6.71967e-06
COASY	2.2418	1.92143e-16	6.02011e-15
NHP2	2.24004	1.04876e-11	1.40262e-10
PRMT1	2.23825	1.54324e-13	2.87848e-12
MICA	2.23621	4.69666e-05	0.000165257
APOO	2.235	3.10572e-11	3.77082e-10
SEMA3A	2.23426	0.00840494	0.0174882
DDB2	2.23165	2.52712e-06	1.16831e-05
QPCTL	2.22983	5.61185e-07	2.96657e-06
RAB38	2.22946	0.0125327	0.0248648
HEATR1	2.22873	3.74622e-11	4.477e-10
TRIM32	2.2281	5.62937e-10	5.38815e-09
ZNF730	2.22539	3.12328e-24	2.98603e-22
SQLE	2.221	0.000275542	0.000811066
ANKFY1	2.21884	2.55522e-11	3.15276e-10
CYB5B	2.21751	2.74594e-15	7.02481e-14
NCAPD2	2.21708	3.01102e-11	3.65849e-10
KAT5	2.21517	2.83043e-13	5.0811e-12
PRR11	2.21408	1.02041e-07	6.35607e-07
FAM120B	2.2138	4.6375e-15	1.13105e-13
SKP2	2.21156	4.01675e-09	3.23876e-08
FMN2	2.20921	0.000216413	0.000651105
GLE1	2.2087	1.16541e-17	4.46191e-16
MMAB	2.20823	1.26914e-11	1.6615e-10
GBE1	2.20754	7.98216e-11	8.98114e-10
POLD2	2.20413	2.20711e-10	2.26965e-09
STARD4	2.20382	0.000226664	0.000678639
EIF3L	2.20285	1.06424e-07	6.58744e-07
NAT10	2.20203	4.75997e-15	1.15755e-13
NRIP3	2.20158	5.22343e-05	0.000182335
SFXN3	2.20127	1.0046e-09	9.10998e-09
UPP1	2.19989	0.00182542	0.00447488
MARS	2.19886	3.32686e-13	5.89013e-12
MCM10	2.1974	4.09817e-08	2.74692e-07
XRCC6	2.19703	6.47878e-13	1.09186e-11
TOE1	2.19503	5.1931e-15	1.25195e-13
TRAF3IP2	2.19101	5.87402e-05	0.000202468
CENPBD1	2.1891	5.2981e-10	5.10908e-09
SLITRK2	2.1876	0.00116231	0.00296578
DDX49	2.18473	4.51856e-13	7.8342e-12
ZNF85	2.18215	2.498e-11	3.09128e-10
GNG2	2.1815	0.000782067	0.00207366
KIF15	2.18091	1.14181e-07	7.01825e-07
RNF4	2.17942	5.76498e-19	2.78769e-17
TMX2	2.17782	4.31786e-16	1.28158e-14
LDHB	2.1739	9.15722e-08	5.74778e-07
SLC35B4	2.17237	3.76632e-15	9.39112e-14
BRMS1	2.17116	2.31242e-10	2.3692e-09
CYB5D2	2.16977	1.19903e-07	7.33758e-07
LIG3	2.16928	5.59254e-13	9.54784e-12
MRPS7	2.16874	3.01601e-13	5.37962e-12
MBTPS2	2.16367	4.94352e-16	1.4536e-14
KXD1	2.16185	1.62038e-20	1.00039e-18
LCP1	2.15854	0.000173603	0.000535402
FOXL2NB	2.15483	1.06669e-08	7.99943e-08
PLA2G4C	2.1544	0.000139213	0.000441131
GPR3	2.15231	3.35872e-06	1.51673e-05
IMMT	2.1514	3.43652e-18	1.44463e-16
PLOD3	2.1489	2.77877e-06	1.27269e-05
LBHD1	2.14806	1.64513e-12	2.53917e-11
WDR62	2.14667	3.23113e-08	2.20293e-07
MAGEA6	2.14603	0.0899704	0.139353
ANLN	2.14476	2.2884e-07	1.31211e-06
DNASE2	2.1445	2.07627e-07	1.20201e-06
C7orf49	2.14433	9.00773e-18	3.50485e-16
ARFGAP2	2.1429	5.57059e-14	1.11219e-12
SPRYD3	2.14124	1.97374e-08	1.40223e-07
DDB1	2.13911	2.28515e-12	3.47256e-11
KIAA1524	2.13831	2.52125e-08	1.7547e-07
PYROXD2	2.13643	0.00778442	0.0163476
P4HA2	2.13538	7.58408e-05	0.000254389
SLC18B1	2.13438	0.00275078	0.00649835
ZNF530	2.13289	4.85852e-16	1.43113e-14
DIAPH3	2.132	1.66629e-07	9.84766e-07
RNF123	2.129	1.16732e-11	1.54635e-10
EXOSC10	2.12599	1.57497e-16	4.99068e-15
BATF2	2.12452	7.64279e-05	0.000255948
TANGO6	2.12143	1.28932e-12	2.04665e-11
ALG12	2.12118	5.37843e-14	1.07954e-12
PHGDH	2.12055	0.0368143	0.0643145
MLST8	2.12045	1.19181e-10	1.29988e-09
CKAP2	2.1197	4.23108e-08	2.83161e-07
ELOVL1	2.11933	7.04824e-10	6.61009e-09
ECE2	2.11692	2.2535e-09	1.91388e-08
HSD17B7	2.11476	5.91354e-08	3.85869e-07
CTPS1	2.11399	9.75289e-11	1.07849e-09
RAD23A	2.11341	4.00381e-13	7.02177e-12
KIF18A	2.11238	2.9384e-09	2.43498e-08
PLK4	2.10709	8.89789e-10	8.16177e-09
HNRNPK	2.10387	1.07892e-26	1.42138e-24
AK4	2.10372	0.000163763	0.000508617
SNUPN	2.10178	1.70903e-16	5.38489e-15
ACTL8	2.10133	2.15397e-06	1.00975e-05
UPRT	2.09981	2.34434e-20	1.40083e-18
LRRC59	2.09839	1.1158e-09	1.00368e-08
LGALS12	2.09766	0.000549253	0.00151045
TROAP	2.09624	1.42027e-06	6.92986e-06
TMEM45A	2.09533	0.000205718	0.000622513
HMGN2	2.09503	6.48029e-13	1.09186e-11
C9orf64	2.09377	4.9482e-07	2.63994e-06
PPP1R36	2.0937	5.86215e-10	5.58509e-09
LAMB1	2.09283	0.000417114	0.00118024
ZNF415	2.09158	6.8333e-05	0.00023195
CDK1	2.09156	1.21734e-07	7.437e-07
GFM2	2.0898	3.36481e-11	4.0385e-10
PMEL	2.0894	0.237002	0.316868
PIGB	2.08918	1.90437e-10	1.98557e-09
GSTZ1	2.0889	1.86619e-06	8.87529e-06
SLC16A13	2.08632	7.36875e-06	3.08757e-05
ARMC9	2.08138	4.535e-10	4.42163e-09
SLC25A19	2.08137	4.32568e-11	5.08594e-10
FCMR	2.08124	0.0204363	0.0384308
SPG20	2.07852	5.83815e-10	5.5657e-09
SFXN1	2.0751	2.96371e-05	0.000108361
ZNF45	2.07258	2.41406e-12	3.63216e-11
FDFT1	2.06807	2.8245e-07	1.59167e-06
FAM133A	2.06765	0.00109949	0.00281708
TMEM179B	2.06625	1.78048e-09	1.5374e-08
CCNF	2.06522	2.80688e-08	1.93897e-07
SDHA	2.05997	1.15971e-07	7.1204e-07
ARMCX6	2.05795	4.23374e-10	4.16185e-09
TUBGCP4	2.05519	2.11198e-15	5.54718e-14
RIOX2	2.05406	3.89637e-18	1.62165e-16
PRDX1	2.05338	0.00135077	0.00340461
CA6	2.05107	5.87256e-07	3.09363e-06
RETSAT	2.04956	3.9605e-05	0.000141286
RAB5C	2.0489	5.80349e-12	8.17325e-11
PCYT1A	2.04789	4.81086e-17	1.65618e-15
GINS2	2.04662	7.70512e-08	4.89239e-07
PPP5C	2.04252	6.88697e-16	1.97643e-14
THNSL1	2.04183	3.91071e-08	2.62982e-07
CUBN	2.04077	1.25838e-05	4.97611e-05
ALDH18A1	2.04064	2.99392e-13	5.35163e-12
CCNB2	2.03957	2.51086e-05	9.30849e-05
LOXL4	2.03821	0.148108	0.213143
ST6GALNAC2	2.03819	0.00801119	0.0167712
TCP1	2.03803	1.91824e-10	1.99651e-09
SHMT2	2.03752	1.07912e-07	6.67215e-07
CHMP6	2.03193	2.15317e-08	1.51875e-07
STK11IP	2.02901	1.91279e-11	2.41167e-10
SLC47A1	2.02885	0.000158588	0.000494103
BCKDHA	2.02875	4.51447e-10	4.40418e-09
RTN4IP1	2.02803	1.07545e-12	1.72816e-11
SIAE	2.0272	1.79722e-06	8.57162e-06
LPCAT3	2.02291	1.41828e-07	8.51733e-07
MBTPS1	2.02242	2.04863e-12	3.1302e-11
HK1	2.02162	8.93522e-09	6.78999e-08
GAA	2.0205	1.5339e-05	5.93242e-05
SF3B4	2.01963	8.93645e-09	6.78999e-08
ALDH7A1	2.01894	1.07721e-07	6.6628e-07
MVD	2.01888	7.37745e-07	3.81025e-06
TMEM69	2.0187	1.5723e-17	5.87192e-16
PDHB	2.01646	6.27127e-20	3.50919e-18
ISCA1	2.01578	2.27843e-14	4.90609e-13
GFPT2	2.01534	0.00336479	0.00777465
TRAF1	2.01528	0.00650192	0.0139413
ELOA	2.01326	9.17443e-12	1.24491e-10
TRAFD1	2.01319	2.17891e-15	5.69616e-14
ADAT1	2.01104	1.27816e-11	1.672e-10
NDUFS7	2.01054	1.66688e-06	8.01164e-06
UBA1	2.00881	2.43671e-13	4.4362e-12
TMLHE	2.0078	5.48762e-15	1.32106e-13
FIBP	2.00552	8.048e-09	6.16779e-08
MDH2	2.005	1.32244e-10	1.42105e-09
MEOX2	2.00444	0.0123111	0.0244836
TSSC1	2.00399	1.61057e-14	3.58331e-13
DDX41	2.00248	3.06631e-10	3.072e-09
ZNF649	2.00146	8.62236e-06	3.54972e-05
ZNF410	2.00077	7.54354e-19	3.54525e-17
INTS3	2.00062	1.3015e-10	1.40631e-09
PAK1	1.9977	0.00014158	0.000447869
PGD	1.99758	2.05879e-07	1.1952e-06
UGT8	1.99745	0.00198102	0.00481961
PIK3R4	1.99658	2.90677e-15	7.41359e-14
ABHD10	1.99531	6.29482e-12	8.81327e-11
MFN2	1.99333	1.41823e-13	2.65715e-12
POPDC3	1.993	0.00829631	0.0172859
KIF23	1.99272	1.61141e-08	1.1646e-07
PDIA4	1.99227	4.58425e-06	2.00468e-05
RIBC2	1.99049	3.43222e-06	1.54367e-05
SRPRB	1.98986	9.76923e-12	1.31496e-10
BAIAP2L2	1.98973	0.0171783	0.0329447
PPT1	1.98909	7.18903e-12	9.98171e-11
FCGR2A	1.98794	0.00140018	0.00351378
AAMP	1.98697	5.59722e-14	1.11617e-12
ARCN1	1.98623	6.21213e-12	8.7072e-11
LAS1L	1.9859	5.35569e-19	2.59728e-17
CKAP5	1.98463	3.16857e-14	6.62667e-13
TBCCD1	1.98293	6.14118e-16	1.78073e-14
GAS7	1.98203	0.000755416	0.00201192
SLC4A2	1.9812	6.13306e-07	3.22477e-06
FAM210A	1.98089	3.36406e-06	1.51831e-05
SC5D	1.98011	3.96832e-06	1.76065e-05
AK2	1.97536	3.66848e-12	5.33716e-11
RFX5	1.97299	4.75407e-12	6.82165e-11
SF3B3	1.97263	1.56687e-12	2.4341e-11
CENPI	1.97204	2.88756e-11	3.51615e-10
DHX8	1.97131	4.88373e-14	9.9042e-13
EPDR1	1.97057	0.0220497	0.0410679
HBP1	1.97014	5.61895e-10	5.38206e-09
PTCD1	1.96855	8.33637e-14	1.61993e-12
ATG9B	1.96819	8.48258e-10	7.82802e-09
CXorf40A	1.96785	1.41753e-15	3.84052e-14
ESCO2	1.96747	3.29454e-09	2.70334e-08
INPP5B	1.96668	2.53384e-15	6.52493e-14
SNX11	1.96426	9.37534e-13	1.52142e-11
AATF	1.96217	1.06125e-12	1.70893e-11
CHID1	1.95924	1.68558e-09	1.46121e-08
EIF3M	1.95451	8.61801e-13	1.40946e-11
RPAP1	1.95308	1.30438e-10	1.40655e-09
ZDHHC12	1.95252	1.26622e-05	5.00595e-05
TRAIP	1.94992	3.39314e-09	2.77879e-08
LMAN2L	1.94667	4.69947e-12	6.74909e-11
HMCES	1.94633	7.402e-13	1.22617e-11
KIT	1.94333	0.0924525	0.142683
DLD	1.94264	6.55906e-13	1.10291e-11
MMP10	1.94118	1.85238e-07	1.0844e-06
PIGV	1.94108	3.5966e-11	4.31051e-10
P4HB	1.94052	2.12747e-07	1.22698e-06
DEPDC1B	1.93664	1.47001e-07	8.79012e-07
PRPF8	1.93644	1.67995e-10	1.7722e-09
CXorf57	1.93558	2.14922e-05	8.05703e-05
FCHSD1	1.93534	2.5239e-09	2.12411e-08
FBXO36	1.93502	7.22823e-10	6.76751e-09
PFAS	1.93475	1.01935e-09	9.22381e-09
P2RX6	1.93457	0.000835719	0.00220126
CHAF1B	1.9335	1.26439e-07	7.68213e-07
STIL	1.93077	3.39463e-10	3.38674e-09
USP10	1.92563	6.49392e-15	1.54113e-13
OGFOD2	1.92558	1.37414e-12	2.1669e-11
RNF20	1.92554	3.42384e-16	1.03401e-14
FTSJ1	1.92366	2.38694e-15	6.1916e-14
ALDOC	1.92354	0.0186523	0.0354547
CDK2	1.92335	0.00602995	0.0130412
EIF5A2	1.9232	1.13362e-06	5.64146e-06
TRIM51	1.92309	0.00570353	0.0124171
SLC36A1	1.92279	2.38866e-09	2.02046e-08
E2F8	1.9226	2.06249e-06	9.7369e-06
SCAMP3	1.92252	2.12294e-08	1.50059e-07
C16orf58	1.92128	2.8444e-09	2.3606e-08
SMG8	1.92071	4.80281e-13	8.27558e-12
GART	1.91895	2.91446e-14	6.16459e-13
CDK20	1.91879	4.1267e-10	4.06238e-09
STRADA	1.91869	1.52236e-11	1.96533e-10
IPPK	1.91787	1.07851e-10	1.18402e-09
FASTKD2	1.91769	1.80519e-15	4.80934e-14
DPYSL4	1.91745	0.0123398	0.0245316
COQ5	1.91548	3.00358e-13	5.36316e-12
PELO	1.91393	7.58258e-11	8.56611e-10
ABHD2	1.91384	0.00121006	0.00307589
DHFR	1.91114	1.29189e-07	7.82571e-07
SLC35A5	1.90886	2.17375e-14	4.72325e-13
HS1BP3	1.90725	1.44187e-08	1.05173e-07
CSPG4	1.90433	0.0174398	0.0333583
INTS9	1.90281	3.21361e-08	2.19278e-07
USB1	1.90263	1.13205e-10	1.24036e-09
SLC25A15	1.90156	1.2223e-08	9.05683e-08
HMGB3	1.90072	0.000125958	0.0004021
API5	1.89518	3.79906e-13	6.69074e-12
ZNF490	1.89396	2.05861e-17	7.5202e-16
BAK1	1.89323	4.89442e-09	3.89389e-08
GRN	1.89312	3.55196e-05	0.000128105
C11orf98	1.89298	2.92847e-08	2.01655e-07
GINS4	1.89267	9.42287e-10	8.58682e-09
AP3M2	1.8926	1.07847e-06	5.38783e-06
ZWINT	1.89151	7.80289e-07	4.00953e-06
FAF2	1.89122	3.04566e-18	1.29005e-16
BAAT	1.89086	0.0593242	0.0971377
PJA1	1.8883	1.07368e-08	8.04466e-08
TMEM186	1.88771	8.26905e-15	1.93226e-13
CCDC51	1.88615	7.94977e-11	8.95071e-10
RUVBL1	1.88293	1.5867e-10	1.67914e-09
TMEM199	1.88279	1.7399e-17	6.42611e-16
LOXL2	1.8825	0.000906764	0.00236604
ENTPD7	1.88073	5.85098e-09	4.58085e-08
BYSL	1.87958	1.30101e-08	9.5764e-08
MMS19	1.87894	9.53192e-11	1.05825e-09
TIMM10B	1.87854	2.92922e-15	7.44815e-14
ZNF28	1.87831	4.05357e-07	2.20427e-06
SLC25A44	1.87773	6.26542e-09	4.87567e-08
NIM1K	1.87709	6.48036e-08	4.19431e-07
L3MBTL2	1.87666	5.05307e-08	3.34484e-07
RNF121	1.87576	4.73316e-10	4.59342e-09
HACL1	1.87555	3.14654e-09	2.58951e-08
SLC35A4	1.87547	3.1345e-09	2.58214e-08
PKLR	1.87456	0.0213528	0.0399523
STK10	1.87452	3.78923e-06	1.68566e-05
DIABLO	1.8731	3.9425e-16	1.18e-14
CCDC22	1.87184	2.42472e-10	2.47468e-09
SLC26A2	1.87135	0.00428124	0.00963276
BRF2	1.87135	2.79783e-10	2.82304e-09
MGST1	1.8695	0.030775	0.0549048
IFT122	1.86866	1.49678e-10	1.59405e-09
ETV4	1.86866	0.000232501	0.000694389
RPA1	1.86852	1.12699e-11	1.49886e-10
HSPA8	1.86755	4.07918e-10	4.01936e-09
NUP85	1.86457	1.03929e-13	1.96701e-12
SMC1B	1.86428	5.08335e-08	3.36164e-07
YIPF2	1.86346	3.60564e-09	2.93399e-08
PSMD7	1.8633	1.38208e-12	2.17737e-11
GM2A	1.86244	3.31815e-05	0.000120269
ORC5	1.86223	4.24524e-11	5.00896e-10
CD109	1.86209	0.0114579	0.0229939
C19orf54	1.86066	2.86979e-10	2.8907e-09
RFC4	1.86024	1.50725e-10	1.60317e-09
SLC5A6	1.85926	1.75194e-07	1.03174e-06
XPC	1.85899	2.98155e-10	2.99425e-09
SLC6A15	1.85779	0.00180063	0.00442124
RFWD3	1.85775	2.00584e-12	3.06761e-11
BRCA1	1.85522	8.13212e-09	6.22408e-08
APOBEC3C	1.85312	0.000143557	0.000453265
NRN1	1.85309	0.0414386	0.0712767
NTMT1	1.85243	4.31474e-07	2.33322e-06
NUF2	1.8496	3.43287e-05	0.000124211
CKS2	1.84917	6.05181e-05	0.000207698
FAM86C1	1.84867	1.30563e-07	7.89753e-07
NFATC2	1.84806	0.0129681	0.0256501
ABCB8	1.84777	3.61837e-06	1.62086e-05
FRMD6	1.84731	0.000146363	0.000460646
PRR9	1.84731	2.19624e-07	1.26359e-06
LRGUK	1.84628	0.000220509	0.000662477
CTSA	1.84438	3.87103e-05	0.00013836
ORC6	1.84394	2.07978e-06	9.803e-06
ZC3HC1	1.84294	2.25595e-15	5.87917e-14
ICOS	1.8406	9.4e-12	1.27242e-10
ISOC2	1.83815	1.11781e-06	5.56777e-06
CEP72	1.83713	7.89224e-08	5.0036e-07
ZNF492	1.83629	1.06286e-15	2.94416e-14
TRUB2	1.83414	7.26198e-11	8.25408e-10
ASPHD1	1.83302	0.0117349	0.0234713
NCAPD3	1.83133	6.33223e-10	5.98895e-09
WDR54	1.83045	0.000165313	0.000512576
SLC25A45	1.82966	2.65221e-07	1.50421e-06
POLQ	1.82951	3.17305e-10	3.17135e-09
MTCH2	1.82948	9.0106e-10	8.24706e-09
GPATCH3	1.8292	1.40782e-09	1.24296e-08
CCDC58	1.82851	2.34051e-12	3.54701e-11
SYCE2	1.82767	4.32553e-11	5.08594e-10
TMEM229B	1.82586	0.000404279	0.00114819
CORO1C	1.82522	1.14793e-08	8.5364e-08
WDHD1	1.82471	5.96506e-09	4.66144e-08
NME7	1.82447	1.29455e-10	1.40098e-09
DHX38	1.82296	3.23889e-12	4.75767e-11
AEN	1.82215	1.23644e-06	6.10054e-06
ALAS1	1.82175	5.38812e-09	4.2543e-08
PCSK7	1.82136	3.13633e-08	2.14442e-07
PSAT1	1.8198	0.0864014	0.13456
GNG12	1.81948	2.79428e-06	1.27875e-05
ZNF622	1.81944	1.22783e-08	9.08977e-08
HDLBP	1.8188	5.39705e-09	4.25934e-08
OGDH	1.81822	6.66868e-08	4.29791e-07
UTP15	1.81686	8.75281e-14	1.69103e-12
SLC41A3	1.81532	1.01392e-09	9.17959e-09
SORD	1.81507	7.61747e-06	3.17667e-05
PCLAF	1.81359	1.58359e-05	6.10346e-05
PIGF	1.81296	5.05065e-16	1.48194e-14
EIF3C	1.81295	7.68165e-13	1.26998e-11
SHISA2	1.81194	0.0759074	0.120135
SARS2	1.8118	1.93252e-07	1.12658e-06
WARS	1.80981	0.00297675	0.00696853
POLD3	1.80877	1.01754e-12	1.64487e-11
HMGCL	1.80829	2.02837e-07	1.17836e-06
ATP6V0A1	1.8069	1.21821e-05	4.83669e-05
CIAPIN1	1.80598	1.73439e-11	2.20502e-10
DLGAP5	1.804	1.89725e-05	7.19306e-05
MTRR	1.80032	1.1787e-08	8.75318e-08
CENPL	1.79926	7.27542e-11	8.26375e-10
ZNF256	1.79863	5.84693e-08	3.81979e-07
TCTN3	1.79803	2.71279e-11	3.32755e-10
PSMC3	1.79721	3.58499e-10	3.5639e-09
CAV1	1.79668	0.00107365	0.00275468
TUT1	1.79611	5.37873e-11	6.2321e-10
TTI2	1.79412	1.22415e-12	1.95245e-11
PROKR1	1.79329	3.15072e-36	9.08873e-34
ELMO2	1.79119	2.80723e-10	2.82938e-09
TBRG4	1.79052	1.67911e-08	1.20883e-07
ACAD9	1.7875	6.72072e-14	1.31822e-12
MED27	1.78634	6.79143e-10	6.40146e-09
MRPS11	1.78241	5.2781e-11	6.12399e-10
GINS1	1.78093	8.64666e-07	4.39317e-06
SUPV3L1	1.7808	6.65375e-13	1.11659e-11
SPC24	1.7808	1.86677e-05	7.08549e-05
WDR4	1.7801	2.99085e-08	2.05672e-07
PQLC2	1.77971	1.0348e-06	5.18669e-06
BUD31	1.77958	5.74744e-10	5.48861e-09
SYN3	1.77938	7.94021e-09	6.08835e-08
MRPS12	1.77623	4.88596e-07	2.61256e-06
PPP2R1A	1.77597	2.35234e-10	2.40863e-09
FAM72B	1.77564	5.72446e-12	8.08918e-11
CCL20	1.77398	0.00501954	0.0110867
POLR2E	1.7735	1.80838e-09	1.55638e-08
NUCB1	1.77143	8.29721e-08	5.24643e-07
HDHD2	1.77085	7.53005e-09	5.79776e-08
FAM180B	1.77053	9.48224e-05	0.000311807
WDR45	1.77011	4.66855e-10	4.54389e-09
SLC35C2	1.7699	1.51315e-09	1.32617e-08
ZNF595	1.76976	0.000137288	0.000435691
MECR	1.76909	1.13578e-10	1.24364e-09
HAUS8	1.76788	1.12044e-08	8.35761e-08
ILVBL	1.76755	0.000279879	0.000822097
GTF2E1	1.76734	2.56151e-15	6.58319e-14
INTS7	1.76591	7.21129e-11	8.20763e-10
DNAJA3	1.76412	8.27701e-16	2.34276e-14
DHCR24	1.76287	0.0459918	0.0780493
ALX1	1.76004	0.00234053	0.00561104
TMEM140	1.75941	6.39968e-05	0.000218338
CUL1	1.7591	8.55051e-10	7.87334e-09
ZNF317	1.75896	6.61497e-16	1.90491e-14
POLR1B	1.75891	5.37823e-07	2.85204e-06
TARS	1.75729	6.05187e-09	4.72046e-08
IKBKAP	1.75718	9.37202e-14	1.79409e-12
ZNF677	1.75702	2.14029e-05	8.02895e-05
ATP5A1	1.7568	5.92317e-11	6.82511e-10
HSP90B1	1.75627	6.46669e-07	3.38107e-06
TSTD2	1.75546	1.86232e-10	1.94862e-09
CDC23	1.75399	2.56831e-12	3.83664e-11
WRAP53	1.75358	1.78597e-08	1.28135e-07
IVNS1ABP	1.75354	2.35413e-06	1.09408e-05
MPI	1.75082	1.60989e-07	9.54807e-07
POMK	1.75041	7.75788e-06	3.22718e-05
CYB5D1	1.75016	2.39218e-08	1.67252e-07
POLE3	1.74855	1.3325e-12	2.10808e-11
PKNOX2	1.74682	0.0184862	0.0351709
TNFRSF19	1.74644	0.0269387	0.0489106
TIPIN	1.74631	5.81805e-11	6.7225e-10
SLC35A2	1.74486	7.10853e-12	9.87813e-11
STAG1	1.74421	1.22871e-08	9.09221e-08
TFB1M	1.74363	1.36699e-06	6.6894e-06
SLC31A1	1.74168	3.639e-05	0.000130905
GRIK2	1.74036	0.00389084	0.00886286
HADHA	1.74023	3.14116e-09	2.58636e-08
ADAMTS1	1.73952	0.0032897	0.00761484
FDCSP	1.73906	0.127787	0.188295
RPE	1.73882	7.34406e-11	8.32476e-10
DHX35	1.73852	7.86651e-15	1.84076e-13
ARHGEF39	1.73845	1.58357e-08	1.14646e-07
TMPRSS5	1.73814	0.000363373	0.0010412
TCTN1	1.73759	1.05045e-05	4.23627e-05
PLEKHB2	1.73573	1.30618e-09	1.16058e-08
AREL1	1.73546	1.23608e-10	1.34466e-09
CBLL1	1.73528	4.93394e-15	1.19637e-13
OSGIN1	1.73318	0.00282823	0.00666092
ARHGAP6	1.7328	0.00283046	0.0066643
SGTA	1.73139	6.97629e-10	6.54996e-09
ARL2BP	1.7312	3.75074e-07	2.05548e-06
ZNF408	1.73049	3.77317e-08	2.54552e-07
COPG2	1.7302	6.30836e-10	5.97313e-09
ARL13B	1.72989	2.29885e-07	1.31755e-06
FADS1	1.72953	5.55943e-05	0.000192857
TTF2	1.7287	1.36676e-08	1.00032e-07
MRPL47	1.7286	2.43004e-10	2.47757e-09
SRPRA	1.72779	1.41267e-07	8.48964e-07
POLR2B	1.72582	3.9041e-12	5.65537e-11
PARPBP	1.7257	1.0786e-08	8.07069e-08
DLX1	1.7252	0.0203657	0.0383154
ZNF544	1.725	7.88577e-05	0.00026319
TCOF1	1.72441	1.87011e-08	1.33428e-07
LAMA4	1.72433	0.00482459	0.0106971
CH507-9B2.5	1.72305	4.20149e-07	2.27861e-06
ALKBH2	1.72097	1.07529e-08	8.04952e-08
GLB1	1.72047	3.39852e-07	1.8766e-06
EIF4G1	1.72011	9.98646e-09	7.52289e-08
POC1A	1.71776	2.44069e-06	1.13086e-05
RTCB	1.71772	1.80419e-09	1.55358e-08
ODF2	1.71765	1.48381e-08	1.07891e-07
OS9	1.71673	3.76585e-06	1.6766e-05
CCDC163	1.71646	1.1786e-05	4.69615e-05
JKAMP	1.71639	3.7152e-13	6.56059e-12
C5orf22	1.71575	2.11014e-06	9.92984e-06
ST7	1.71384	1.32057e-05	5.19257e-05
TVP23B	1.71349	2.15032e-10	2.21943e-09
ADORA2B	1.71332	0.00577667	0.0125519
RHEBL1	1.7133	1.85584e-05	7.05204e-05
TARS2	1.70946	1.25342e-07	7.62582e-07
G3BP1	1.70853	1.65753e-11	2.12019e-10
APIP	1.7053	7.28e-13	1.21316e-11
DARS2	1.70326	1.23756e-06	6.10427e-06
PARN	1.70274	4.81261e-12	6.88793e-11
TIMMDC1	1.70271	8.37298e-10	7.73968e-09
MCM6	1.70185	1.32537e-07	8.00821e-07
HMG20A	1.69942	3.87924e-08	2.61391e-07
CLSPN	1.69933	2.02726e-05	7.63577e-05
GTF3C1	1.69894	2.23102e-09	1.89767e-08
CHPF2	1.69693	6.64503e-06	2.80895e-05
AMPD2	1.69615	2.5624e-08	1.78186e-07
TMED1	1.69585	4.12276e-09	3.32127e-08
RPS6KB2	1.69434	2.12999e-06	1.00019e-05
KATNB1	1.69368	6.02743e-08	3.92546e-07
EXO5	1.69333	2.34809e-08	1.64514e-07
CSTF2	1.69135	1.69817e-13	3.14641e-12
ZIK1	1.69062	0.000110982	0.000359017
PEPD	1.68987	3.74196e-06	1.66862e-05
CTNNA1	1.6893	1.72267e-07	1.01701e-06
TECR	1.68923	3.69555e-05	0.000132797
TRIM16	1.68843	2.11028e-06	9.92984e-06
AGBL5	1.68703	9.00094e-09	6.83589e-08
LIF	1.68691	0.0584524	0.0958697
ACKR4	1.68676	2.124e-06	9.97941e-06
C11orf70	1.68385	1.98792e-07	1.15566e-06
TRIM48	1.68252	0.0381632	0.0663247
TXNRD1	1.68225	1.14813e-07	7.05448e-07
WDR6	1.68221	1.341e-06	6.57567e-06
LARS2	1.6819	1.57021e-09	1.37187e-08
TEX10	1.68177	1.62262e-10	1.71389e-09
C19orf70	1.68064	3.3819e-06	1.52514e-05
IL36RN	1.68057	9.04878e-14	1.74017e-12
SCARB1	1.6798	0.0130675	0.0257959
XRCC1	1.67879	1.17777e-09	1.05545e-08
ZFPL1	1.67704	8.99402e-07	4.55307e-06
ZNF35	1.67692	5.05737e-05	0.000176944
ZSCAN32	1.67485	1.3153e-15	3.58994e-14
LIN7C	1.6744	2.63018e-08	1.8252e-07
REG3G	1.67402	0.00381447	0.00869954
CKAP2L	1.67284	7.23195e-06	3.03557e-05
PLS3	1.67004	7.92827e-05	0.0002644
MIEF1	1.66888	3.47643e-10	3.46422e-09
ERAL1	1.66758	7.92959e-08	5.02538e-07
EXT2	1.66646	2.62963e-07	1.49242e-06
NEFH	1.66548	0.0962448	0.147772
ZNF845	1.66305	1.38339e-07	8.32868e-07
C11orf24	1.66215	8.4007e-06	3.46661e-05
PRSS35	1.66033	0.00120326	0.00306001
DRG2	1.65881	9.8733e-09	7.44435e-08
PPP2R5D	1.65772	3.33285e-07	1.8458e-06
TRIM68	1.65723	1.54198e-07	9.19418e-07
XRCC2	1.65722	8.3879e-07	4.27573e-06
NOP2	1.65716	3.53628e-07	1.94816e-06
MAGED2	1.6564	4.01571e-07	2.18779e-06
POP1	1.6547	2.30202e-07	1.31807e-06
MFAP3	1.65463	2.6451e-07	1.50068e-06
SNX17	1.65368	4.68736e-10	4.55955e-09
PPAT	1.65337	8.90297e-09	6.77071e-08
NAGA	1.65312	4.89156e-05	0.000171718
NRBP1	1.65286	1.05781e-09	9.55623e-09
AP2B1	1.65196	2.81957e-11	3.44841e-10
TKT	1.65083	0.000196559	0.00059815
CTSC	1.65075	3.81155e-05	0.000136408
GLMP	1.65017	0.00141002	0.00353529
LSS	1.64915	5.77553e-05	0.000199493
ZNF57	1.64902	1.70609e-12	2.62842e-11
TTC26	1.64898	2.42661e-06	1.12527e-05
EXTL3	1.64817	3.72791e-07	2.04565e-06
AHCY	1.64814	2.26191e-05	8.4492e-05
ZMAT5	1.64594	1.7258e-06	8.26163e-06
EARS2	1.64555	1.3902e-10	1.48908e-09
PSMD1	1.6454	2.69829e-12	4.00222e-11
AAR2	1.64537	4.35741e-11	5.11879e-10
ARFIP2	1.64484	4.60535e-08	3.0637e-07
TTI1	1.64408	2.5028e-10	2.5471e-09
ZW10	1.64312	3.18677e-10	3.18316e-09
PAICS	1.64296	3.84515e-10	3.80444e-09
TGOLN2	1.64206	1.31444e-08	9.6456e-08
ZNF177	1.64199	1.0928e-09	9.85643e-09
ACSL1	1.63998	0.000302877	0.0008816
METTL7B	1.63883	0.0201653	0.0379809
TMEM143	1.63522	2.30274e-07	1.31807e-06
HOXD13	1.63513	0.0719406	0.114709
ALKBH3	1.63507	3.40599e-12	4.98126e-11
TMED9	1.63355	7.26028e-08	4.64164e-07
ANGPTL4	1.6334	0.0384805	0.0668415
RAD51AP1	1.63223	3.68067e-06	1.64656e-05
TMEM39A	1.63156	1.33386e-09	1.18251e-08
DHDDS	1.63126	2.52281e-08	1.75506e-07
HYAL3	1.63049	1.38169e-05	5.40117e-05
PMP2	1.62851	0.0666949	0.107439
ZWILCH	1.62724	1.81009e-07	1.06335e-06
TNFAIP1	1.62641	4.37189e-13	7.60355e-12
ATP6V0D2	1.62429	0.0305573	0.054563
IRF4	1.62284	0.0617988	0.100667
TEN1	1.6211	1.33629e-05	5.24577e-05
DAXX	1.61968	3.32675e-09	2.72842e-08
SLC26A6	1.61958	1.55286e-05	5.99604e-05
PTPRZ1	1.61887	0.112352	0.168671
DCPS	1.61865	5.8746e-06	2.51762e-05
UPK1A	1.61793	0.000218134	0.000655931
NUP107	1.61615	1.39844e-06	6.83022e-06
PRAME	1.61596	0.0353421	0.0620602
DNAJC7	1.61566	5.48664e-12	7.77941e-11
UBAP2L	1.61476	1.61827e-09	1.40724e-08
PPIL1	1.61448	6.82433e-08	4.38471e-07
SNRNP40	1.61426	8.01202e-11	9.00867e-10
CANX	1.61281	2.00881e-08	1.42534e-07
NSUN3	1.61078	1.03163e-13	1.95694e-12
ZNF880	1.61035	0.00049621	0.00137817
SCO2	1.6092	0.00058032	0.00158597
CEP19	1.60876	5.62817e-08	3.68913e-07
MLANA	1.60812	0.240603	0.321105
SLC2A3	1.60668	0.0226968	0.0420765
MAOB	1.60356	0.0846946	0.132272
INVS	1.60276	4.04938e-11	4.80157e-10
SMARCAL1	1.60108	1.48137e-15	3.98077e-14
C1QTNF6	1.60024	0.000597394	0.001626
CXorf40B	1.59981	6.91827e-12	9.62975e-11
C6orf58	1.59972	7.43449e-17	2.45823e-15
ZSCAN25	1.59684	7.26959e-13	1.21264e-11
ARF4	1.59644	1.14798e-08	8.5364e-08
CBWD2	1.59621	1.19805e-11	1.57955e-10
GTF3C5	1.59523	4.49901e-07	2.42269e-06
DDX3X	1.59397	7.57052e-07	3.9009e-06
FAAP24	1.59321	9.42381e-08	5.88979e-07
WDR92	1.59284	3.28752e-16	9.96442e-15
ZCCHC17	1.59228	4.92054e-07	2.62937e-06
CAD	1.59201	4.25193e-06	1.87356e-05
TIGAR	1.5918	7.20613e-07	3.72952e-06
ARHGAP1	1.59117	1.42162e-06	6.93444e-06
ATIC	1.59049	5.45635e-09	4.30005e-08
PHPT1	1.58994	0.00019833	0.00060299
NUP93	1.58985	1.69455e-05	6.48926e-05
JAM3	1.58913	0.0386514	0.0671035
MYO19	1.58831	9.24276e-09	7.00683e-08
HBS1L	1.58819	8.10131e-09	6.20334e-08
TICRR	1.58748	8.15217e-06	3.37609e-05
NDUFA9	1.58743	4.69759e-10	4.56684e-09
TSSC4	1.58427	4.56276e-07	2.45544e-06
GFM1	1.58415	1.27332e-10	1.37979e-09
MAGEA3	1.5838	0.216695	0.293946
EXOSC8	1.58363	1.04786e-07	6.49873e-07
ZDHHC9	1.5832	2.87944e-07	1.61501e-06
COPS7A	1.58314	6.1228e-08	3.97828e-07
WDR55	1.58303	5.94642e-09	4.64904e-08
ZNF486	1.58287	4.18239e-05	0.000148631
PIAS3	1.58184	1.23635e-06	6.10054e-06
UMPS	1.58155	5.77787e-13	9.84415e-12
ZNF384	1.58104	5.0066e-09	3.97369e-08
TUBB	1.581	8.00605e-06	3.32133e-05
DNASE2B	1.58073	0.0927661	0.143114
CTSK	1.58008	0.123048	0.182233
PCTP	1.57948	2.79787e-05	0.000102769
ECT2	1.5794	1.21911e-05	4.83914e-05
MRTO4	1.57934	1.14739e-09	1.03043e-08
WWP2	1.57835	8.11227e-07	4.15192e-06
ATP6V0D1	1.57806	3.21911e-05	0.000116881
MITF	1.57777	0.0189857	0.0359902
TPP1	1.57768	0.000295544	0.000863107
NUDC	1.57743	2.86782e-07	1.61066e-06
SERGEF	1.57662	4.64695e-07	2.49433e-06
TUBG1	1.57553	2.08029e-05	7.81967e-05
ZNF200	1.57504	3.32636e-11	4.0096e-10
AARS2	1.57469	5.06016e-06	2.19729e-05
RABL3	1.57091	4.60506e-09	3.68119e-08
CS	1.57082	1.37912e-07	8.309e-07
EXOC7	1.57018	8.64208e-09	6.58427e-08
HPS3	1.56995	7.22689e-08	4.62383e-07
CCT7	1.56943	1.21127e-09	1.08142e-08
NFYC	1.56898	1.8726e-10	1.95816e-09
GNL2	1.56793	2.95346e-09	2.44625e-08
PAAF1	1.56606	1.64815e-06	7.93072e-06
GYG1	1.56562	2.15354e-10	2.22139e-09
PIGO	1.56552	7.50234e-06	3.13334e-05
SDHB	1.56524	4.70319e-08	3.1263e-07
NSF	1.56438	1.96897e-08	1.39944e-07
COPB1	1.56389	7.59796e-09	5.84736e-08
PMM2	1.56321	6.55839e-08	4.23825e-07
MPP1	1.56251	1.09929e-05	4.41379e-05
MYBBP1A	1.56251	5.22936e-06	2.26313e-05
PEX16	1.56229	9.29302e-06	3.79593e-05
TMEM101	1.56143	1.29571e-08	9.54161e-08
MPPE1	1.56001	6.7783e-11	7.75172e-10
MRGPRX4	1.5581	0.00262428	0.00623057
CUL7	1.55755	4.23979e-06	1.8692e-05
ANKMY2	1.5573	2.54579e-06	1.17597e-05
LAMA1	1.55632	0.0563617	0.0928686
LPAR1	1.55479	0.0231863	0.0428842
CD59	1.55476	0.00125488	0.00318063
C2orf42	1.55428	6.32893e-15	1.51055e-13
GMPPA	1.55414	1.45657e-05	5.66739e-05
ATP5G1	1.55411	2.76904e-05	0.000101755
B9D1	1.55357	1.70547e-05	6.52508e-05
NUDT17	1.55275	0.000168934	0.000522445
TFB2M	1.55222	1.04687e-07	6.49672e-07
RAB8A	1.55197	1.78991e-10	1.87964e-09
TGDS	1.55098	0.000945844	0.00245652
KYAT3	1.55048	4.39044e-06	1.92749e-05
NAMPT	1.54985	8.96858e-05	0.000295905
B4GALT4	1.54896	6.87132e-09	5.31995e-08
CDCA3	1.54736	2.58019e-05	9.54211e-05
HNRNPA1L2	1.54722	3.13142e-09	2.58088e-08
MGMT	1.54692	0.030697	0.0547831
RABGEF1	1.54652	7.30844e-13	1.21548e-11
DPAGT1	1.54557	6.78335e-07	3.53559e-06
EIF3I	1.54458	8.54702e-09	6.51778e-08
RRP12	1.54239	9.76566e-07	4.91249e-06
PGAP2	1.54192	1.63752e-07	9.68788e-07
ST6GAL1	1.54079	0.0054242	0.0118832
ACD	1.5401	1.73137e-06	8.2812e-06
ZNF766	1.5393	8.79886e-15	2.04748e-13
C16orf62	1.53798	2.92065e-08	2.01258e-07
CMSS1	1.53797	1.93143e-10	2.00838e-09
TDRD7	1.53785	0.0017711	0.00435664
GPKOW	1.53674	3.95733e-12	5.72751e-11
EDEM2	1.53614	3.24311e-07	1.80207e-06
UBIAD1	1.53481	1.22765e-12	1.95617e-11
WBSCR22	1.53273	5.08652e-06	2.20759e-05
METTL2A	1.53267	3.2374e-11	3.91648e-10
C11orf49	1.53161	1.05897e-07	6.55966e-07
ARHGEF19	1.53041	0.000396969	0.00112863
HGS	1.53013	3.27295e-07	1.81614e-06
SLC22A18	1.5301	0.00918402	0.0189164
CAT	1.52873	3.54787e-05	0.000127985
YWHAZ	1.52806	1.02971e-08	7.73598e-08
CSTF1	1.52792	1.82697e-15	4.85963e-14
PCCB	1.52623	1.72885e-06	8.27147e-06
HSPA9	1.52621	1.14746e-08	8.5364e-08
NUP205	1.52529	1.79152e-10	1.87964e-09
TALDO1	1.52467	2.12735e-05	7.9858e-05
HIST1H2BK	1.52393	0.0112674	0.0226526
ARNT2	1.52322	0.00608087	0.0131293
C5orf34	1.52246	3.97246e-08	2.66599e-07
PIGT	1.52228	2.09208e-05	7.86047e-05
C1QTNF3	1.52101	0.243783	0.324379
LDLRAD3	1.52006	1.67468e-06	8.0422e-06
ERMAP	1.51811	2.19109e-09	1.86656e-08
SF3A3	1.51713	7.99763e-12	1.1013e-10
TPSD1	1.51707	8.56259e-07	4.35443e-06
PSEN1	1.51615	2.32207e-11	2.894e-10
TMEM222	1.51586	4.21433e-06	1.85895e-05
UHRF1	1.51583	0.000489561	0.00136128
TSPAN7	1.51464	0.132944	0.194788
HTATIP2	1.51399	0.0260109	0.047432
RAB1B	1.51252	3.88889e-07	2.12492e-06
DUSP3	1.51217	0.000349754	0.0010058
KPNA6	1.51191	1.42476e-10	1.5222e-09
C17orf80	1.51173	3.17825e-08	2.17219e-07
GSTM4	1.50839	0.000108216	0.000350883
EXOSC5	1.50732	1.09916e-05	4.41379e-05
LRRC41	1.5072	3.46173e-09	2.82528e-08
MEGF10	1.5068	0.0653659	0.105631
CDCA2	1.50572	6.61249e-05	0.000224911
NCEH1	1.50515	0.000608766	0.00165345
ALG14	1.50495	6.50912e-13	1.09561e-11
DBR1	1.50467	3.39998e-12	4.97683e-11
PSAP	1.50436	0.000223516	0.000670837
MKS1	1.50328	1.47978e-08	1.07645e-07
NRSN2	1.50325	3.19466e-05	0.00011612
FANCD2	1.50303	5.7223e-06	2.45802e-05
FAM60A	1.50177	0.00112224	0.00287187
EDC3	1.50072	1.60832e-09	1.40077e-08
GIT2	1.5005	2.09353e-05	7.86414e-05
RINT1	1.5005	1.11577e-06	5.55923e-06
RRP1	1.50045	2.67765e-06	1.23042e-05
HSPD1	1.49976	1.66754e-06	8.01254e-06
DCLRE1B	1.49966	5.79699e-09	4.54071e-08
NUP155	1.49877	2.15701e-08	1.52082e-07
FTSJ3	1.49758	3.45234e-07	1.90379e-06
AMBRA1	1.49723	1.36031e-06	6.6606e-06
SEC22A	1.49528	1.75501e-13	3.23738e-12
MTMR2	1.49487	5.39049e-08	3.54653e-07
NEMP1	1.49319	1.57352e-06	7.60226e-06
DHX16	1.49154	3.5896e-09	2.92392e-08
ZNF350	1.49087	2.2798e-10	2.33721e-09
POLDIP3	1.48842	1.68618e-05	6.46209e-05
CARS	1.48663	7.25815e-07	3.75382e-06
PSMB7	1.48518	6.24749e-06	2.65836e-05
CSE1L	1.48503	2.02256e-08	1.43448e-07
ZNF619	1.48371	8.29076e-09	6.33102e-08
PIGA	1.48362	7.79383e-05	0.000260329
RNF185	1.4832	4.9981e-09	3.97071e-08
PYGB	1.48307	0.00259622	0.00617095
MYC	1.48142	0.00664825	0.0142258
WFS1	1.48104	0.00178781	0.00439428
FKBP10	1.48093	0.0186873	0.0355091
NDUFS2	1.48028	2.77855e-07	1.56822e-06
WDCP	1.48011	2.66701e-10	2.69781e-09
ASH2L	1.47981	1.23632e-07	7.53272e-07
SLFN11	1.47959	0.0184444	0.0350954
COQ3	1.47926	1.37326e-05	5.37198e-05
TBC1D14	1.47764	0.000239134	0.000712547
PDIA5	1.4767	0.000218507	0.000656936
PHF19	1.476	9.83911e-05	0.000322338
TSR2	1.47533	6.94055e-08	4.45596e-07
EDNRB	1.47514	0.0342312	0.0603436
ZNF813	1.47508	2.30454e-05	8.60267e-05
TRIM16L	1.4743	6.84191e-05	0.000232148
SMYD5	1.47376	8.79605e-08	5.54194e-07
ABCC4	1.47316	0.00469354	0.0104397
GGCX	1.47276	3.40008e-08	2.31059e-07
SELENOT	1.47267	1.31944e-06	6.47568e-06
NUP160	1.47235	1.82154e-07	1.06896e-06
ULBP2	1.47176	0.00339372	0.00782854
RAB5B	1.47116	3.45616e-05	0.000124973
GRPEL1	1.47114	7.93735e-09	6.08835e-08
LMAN2	1.47073	3.15559e-06	1.4339e-05
CD177	1.46984	7.34457e-07	3.79617e-06
TPM3	1.46946	6.60023e-08	4.262e-07
VAMP7	1.4683	2.84723e-07	1.60071e-06
VAMP7	1.4683	2.84723e-07	1.60071e-06
PPEF1	1.46772	0.000105378	0.000343011
COQ8B	1.46691	2.61817e-06	1.20529e-05
PIGG	1.46672	1.31854e-08	9.67144e-08
WIPI1	1.4667	0.0311347	0.0554754
MOSPD2	1.46629	4.91508e-05	0.000172363
ERAP2	1.466	0.0384579	0.0668092
SH2D1B	1.46555	8.89331e-08	5.59376e-07
COMMD8	1.46498	3.54219e-05	0.000127835
PTDSS1	1.46468	6.88493e-07	3.57961e-06
WDR73	1.46418	1.26829e-09	1.12811e-08
NT5C2	1.46348	8.48842e-07	4.32197e-06
XYLB	1.46343	0.000258586	0.00076614
UQCRC2	1.46339	4.62117e-09	3.6923e-08
CPSF3	1.46318	2.3792e-11	2.95958e-10
POLA1	1.46246	3.33351e-11	4.01533e-10
PNPLA4	1.4614	0.000123871	0.000396372
AACS	1.46127	8.16066e-06	3.37877e-05
ITGB3	1.45986	0.187757	0.260867
SHMT1	1.45967	0.000869778	0.00227936
TRPV4	1.45923	0.0648921	0.105052
ELK1	1.45923	1.38055e-07	8.31461e-07
CD58	1.45917	0.00214792	0.00519018
DUS2	1.4585	1.43775e-07	8.62129e-07
AKIP1	1.45838	1.76439e-07	1.03798e-06
ALDH1B1	1.45807	0.0523624	0.087302
BCAT2	1.45514	0.000184542	0.000566111
ACSBG1	1.45495	0.0024231	0.00579817
ZSCAN22	1.45492	9.30848e-12	1.26208e-10
RNF138	1.45475	1.00987e-05	4.08539e-05
HAT1	1.45434	1.66412e-09	1.4456e-08
DCAF11	1.45422	7.04645e-07	3.6579e-06
SMC1A	1.45312	4.79416e-11	5.59742e-10
PLTP	1.45251	0.0108977	0.0220231
EXOC3	1.45247	3.14715e-06	1.43045e-05
RNF14	1.45218	8.80222e-07	4.46408e-06
ZNF543	1.45147	3.96738e-11	4.71436e-10
ZNF610	1.4509	0.00338593	0.0078138
EFL1	1.45039	2.06136e-09	1.76142e-08
CDK5	1.44971	6.34976e-05	0.000216945
AC004381.6	1.44945	2.4615e-07	1.40414e-06
FANCG	1.44807	0.000148745	0.000466826
RAB7B	1.44801	0.0183718	0.0349775
BLM	1.44714	5.74783e-06	2.46772e-05
CLIC1	1.44683	9.72994e-07	4.89746e-06
AIFM2	1.44603	0.00134114	0.00338135
COPE	1.44573	2.54572e-06	1.17597e-05
STEAP1B	1.44569	0.0353041	0.0619999
TRMT61B	1.44542	8.52369e-10	7.85297e-09
TIMM10	1.44357	2.50572e-06	1.15874e-05
RCN1	1.44313	0.00123315	0.00312935
PLA2G3	1.44247	4.24846e-19	2.12182e-17
GALE	1.44233	0.00163708	0.00405418
RRP8	1.44146	9.31886e-11	1.03666e-09
DHRS3	1.44112	0.0219302	0.0408863
LDLRAP1	1.44101	0.000381062	0.00108705
CLTC	1.4389	1.17035e-07	7.17786e-07
TMEM255B	1.43851	5.23627e-06	2.26553e-05
CDC26	1.43836	2.41159e-09	2.03677e-08
TRPM2	1.43809	0.00590234	0.0127917
POGLUT1	1.43777	8.1885e-07	4.18838e-06
COA3	1.43691	1.49461e-06	7.25242e-06
KDM8	1.43587	3.64816e-09	2.96586e-08
EIF1AD	1.43505	4.27877e-10	4.20365e-09
NOLC1	1.43477	1.93135e-07	1.1263e-06
CYCS	1.43463	1.61337e-06	7.7813e-06
ABR	1.43448	0.00127029	0.00321676
FIGNL1	1.4344	2.25086e-07	1.29235e-06
ACCS	1.43422	0.000165577	0.000513202
DDX56	1.43216	1.20218e-06	5.95253e-06
PIP5K1B	1.43141	0.00570493	0.0124186
PLSCR4	1.4313	0.0137224	0.0269219
ENPP2	1.43087	0.114584	0.171584
NECAP2	1.42996	9.96667e-11	1.10068e-09
GGH	1.4298	0.000504454	0.00139874
POLE2	1.42907	1.47856e-05	5.74496e-05
PLOD2	1.429	0.0138351	0.0271143
ACOT9	1.42833	2.77712e-09	2.31049e-08
ZNF287	1.42819	0.000251225	0.000746194
SDR39U1	1.42798	1.66314e-07	9.83253e-07
HNRNPH2	1.4278	1.13939e-11	1.51295e-10
AGK	1.42718	1.04278e-07	6.47377e-07
ERCC3	1.42626	2.22672e-16	6.92477e-15
TCTN2	1.42622	8.73136e-05	0.000288876
FARSB	1.4261	1.69714e-09	1.46819e-08
FOXRED1	1.42526	3.09726e-05	0.000112909
SZRD1	1.42501	3.60306e-08	2.43961e-07
CENPO	1.4239	1.51577e-06	7.34867e-06
DPF2	1.42361	1.30747e-08	9.60709e-08
TMSB15A	1.42331	0.0309652	0.0552205
RABEPK	1.42263	1.32992e-07	8.03282e-07
ZNF41	1.42262	1.16337e-08	8.64316e-08
DPM2	1.42215	7.70317e-05	0.00025766
COG6	1.42058	1.66296e-05	6.38436e-05
ZNF93	1.42041	5.34112e-05	0.00018621
URM1	1.41908	3.27058e-05	0.000118621
GDNF	1.41875	0.105116	0.159273
TDRD9	1.41826	0.0967183	0.148417
ALG1	1.41814	2.08863e-06	9.84084e-06
PIP5K1A	1.41801	1.72628e-08	1.23959e-07
ZNF267	1.41771	7.7237e-07	3.97249e-06
HFE	1.41698	0.017011	0.0326464
INIP	1.41353	8.16715e-08	5.1681e-07
TRAPPC6A	1.41322	0.00230507	0.00553315
SMC2	1.41257	1.81107e-05	6.90073e-05
CSTF2T	1.4119	3.96362e-09	3.20209e-08
LMLN	1.41158	1.45192e-06	7.0637e-06
MPDU1	1.41134	3.49831e-05	0.000126379
NUFIP1	1.41049	3.06983e-08	2.10497e-07
CDKN3	1.41044	0.000112072	0.000362124
ACAD10	1.41019	1.67019e-05	6.4077e-05
DCTD	1.40957	2.60129e-05	9.61178e-05
LCMT1	1.40937	1.20936e-09	1.08029e-08
ARHGDIA	1.40876	0.00021002	0.000633924
VAMP3	1.40799	2.84068e-07	1.5981e-06
GOSR2	1.40754	9.8806e-10	8.97948e-09
RMI1	1.40742	3.07663e-07	1.71813e-06
CEP68	1.4066	2.62172e-10	2.65843e-09
MND1	1.4064	0.000146804	0.000461774
GCN1	1.40632	1.04194e-07	6.47092e-07
CHCHD3	1.40615	1.09471e-07	6.7612e-07
TOMM40L	1.40359	1.28637e-06	6.33382e-06
MAPRE1	1.40351	1.98608e-10	2.06136e-09
SCFD2	1.40286	4.52322e-06	1.98058e-05
ECSIT	1.40213	1.51778e-05	5.88232e-05
SLC25A38	1.40193	0.0364513	0.063767
MCM4	1.40179	0.000102259	0.000333704
GALNT2	1.40179	0.00171199	0.00422717
BCAP31	1.40163	1.37691e-05	5.38501e-05
TUBB3	1.40126	0.0516654	0.0862689
STPG1	1.40079	5.22191e-05	0.00018232
COL9A1	1.40071	0.0905004	0.140083
TMEM17	1.40051	1.20109e-06	5.9489e-06
DCTN4	1.40045	1.41316e-07	8.48964e-07
DCTN1	1.40019	2.11493e-07	1.22101e-06
MLX	1.39986	1.70819e-10	1.79973e-09
ERP44	1.39947	7.68148e-08	4.88294e-07
ZMPSTE24	1.39816	6.86817e-09	5.31995e-08
TMEM98	1.39719	0.0417694	0.0717793
MED24	1.39707	2.11108e-06	9.92984e-06
FUZ	1.39685	6.25557e-05	0.000214076
ZNF160	1.39682	6.76651e-07	3.529e-06
FOPNL	1.3967	2.35725e-07	1.34742e-06
ACO1	1.3952	6.3461e-05	0.000216864
PDHX	1.39417	4.8357e-09	3.85451e-08
SDSL	1.39395	0.00255621	0.00608795
SUMO1	1.39393	4.38671e-10	4.28703e-09
GTPBP4	1.39354	2.74127e-06	1.25621e-05
OBP2A	1.39338	8.08229e-06	3.34881e-05
WBP11	1.39328	6.64009e-07	3.4674e-06
RBM23	1.39296	2.14299e-08	1.51284e-07
ATP6V1A	1.39285	4.48956e-08	2.99382e-07
DOLPP1	1.39204	3.50085e-07	1.92927e-06
DCTN5	1.39202	3.56067e-12	5.18482e-11
FAH	1.39198	0.00503211	0.0111116
TREX1	1.39176	0.000948235	0.00246197
NANS	1.39087	0.000840653	0.00221321
ACP2	1.39065	5.01892e-06	2.17995e-05
WDR77	1.38982	3.66594e-07	2.01494e-06
PEX19	1.38796	2.29947e-07	1.31755e-06
HARBI1	1.38704	1.28513e-08	9.47204e-08
ECHDC1	1.38552	0.000522377	0.0014427
ZNF438	1.38509	3.26374e-05	0.000118425
RUVBL2	1.3848	5.9994e-05	0.000206238
TMEM106C	1.38425	4.02817e-05	0.000143455
RHBDD1	1.38368	7.3271e-09	5.64929e-08
PNMAL1	1.38239	0.044297	0.0754718
GBF1	1.38219	2.13501e-06	1.00227e-05
NBR1	1.38187	4.53955e-07	2.44373e-06
ZNF229	1.38144	0.00749187	0.0158066
FITM2	1.38087	2.7742e-07	1.56649e-06
UTP14A	1.38081	9.36114e-08	5.855e-07
BTD	1.3798	0.000167983	0.000519723
FAM19A3	1.37703	0.0240017	0.0442163
IPO13	1.37691	6.5514e-05	0.000222969
ZFYVE27	1.37666	3.38594e-06	1.52573e-05
GAS8	1.37591	1.09059e-07	6.74055e-07
SKIV2L	1.37536	1.30802e-05	5.15656e-05
PDE4C	1.3743	3.74161e-06	1.66862e-05
CASP9	1.37423	6.76903e-07	3.52922e-06
KIAA0319L	1.37396	1.27282e-07	7.72697e-07
PDXDC1	1.37341	4.95934e-07	2.64419e-06
MLH1	1.37199	3.10237e-08	2.12467e-07
LYPLA2	1.37101	8.14416e-05	0.000270572
MSH2	1.3699	2.70822e-07	1.53079e-06
PA2G4	1.3695	1.17716e-07	7.21431e-07
BCAS3	1.36899	0.021594	0.0403494
GNPDA1	1.36519	4.76572e-06	2.07806e-05
DAZAP2	1.36424	4.58438e-07	2.4639e-06
PPIL2	1.36257	2.58537e-06	1.19228e-05
FABP5	1.36222	0.0127939	0.0253348
FKBP15	1.36206	1.24935e-07	7.6038e-07
COCH	1.36068	0.0413881	0.0712093
KCTD14	1.36067	0.0730279	0.116254
ERCC1	1.36028	4.01886e-05	0.000143215
TACC3	1.35983	0.000506433	0.00140377
SNAI3	1.35972	1.48069e-09	1.30249e-08
COMMD2	1.3593	1.29737e-06	6.38268e-06
TMBIM6	1.35901	2.3979e-08	1.67512e-07
ZNF394	1.35829	9.68394e-10	8.81033e-09
OLFML2A	1.35742	0.0139684	0.02735
GALNT7	1.35668	0.00918685	0.0189199
FBXO6	1.35604	0.0120755	0.0240632
ERLIN1	1.35565	2.3809e-08	1.66533e-07
TLDC1	1.35426	2.36596e-08	1.65627e-07
LIG1	1.35418	0.000117097	0.000376468
LCN2	1.35405	0.0899581	0.139347
TMEM80	1.35302	0.000209679	0.000633009
MAD2L1BP	1.35257	9.27095e-06	3.78877e-05
EIF6	1.35254	1.48922e-05	5.78367e-05
VPS18	1.35148	0.000183295	0.000562595
LARS	1.35057	9.34048e-07	4.71704e-06
VPS39	1.34995	3.71051e-08	2.50847e-07
MZT1	1.34903	5.61867e-05	0.000194509
AP2M1	1.34888	1.844e-05	7.01258e-05
DAAM2	1.34878	0.0212334	0.0397511
MTFR1L	1.34772	7.96192e-10	7.39649e-09
ANAPC15	1.34765	1.32636e-05	5.21168e-05
TOP3A	1.34578	2.41182e-06	1.11872e-05
ROBO1	1.34569	0.024521	0.0450475
LBR	1.3455	0.000543048	0.00149535
TMEM171	1.34544	0.0673994	0.108387
GLB1L2	1.34496	0.0643982	0.104363
TIMM17A	1.34449	2.47126e-07	1.40923e-06
CLDN1	1.34396	0.198862	0.27373
FTO	1.34255	1.54283e-08	1.1189e-07
POLR3C	1.34242	2.1234e-07	1.22505e-06
KCNK5	1.34174	0.0466712	0.0790659
ZDHHC5	1.34165	3.98611e-09	3.21871e-08
NDUFV1	1.34156	0.000421004	0.00118949
XPO5	1.34112	2.41913e-05	8.99234e-05
CCL3	1.34076	0.0196182	0.0370549
TTC25	1.34013	7.45945e-06	3.11932e-05
SNRNP200	1.33992	1.16913e-07	7.17298e-07
MRPS22	1.3392	3.59133e-09	2.92392e-08
SYPL1	1.3376	1.29728e-07	7.85553e-07
DCAF4	1.33719	7.06883e-06	2.97537e-05
DLAT	1.3351	2.70189e-06	1.2402e-05
SMN2	1.33457	0.00028601	0.000838779
ZNF347	1.33416	0.000146352	0.000460646
PARS2	1.33381	1.5696e-06	7.58767e-06
ZNF155	1.33369	9.17324e-06	3.75526e-05
NCOA4	1.33304	1.20801e-06	5.9761e-06
PRCP	1.33258	5.97679e-05	0.000205672
DDX39A	1.33254	6.19598e-05	0.000212298
CNRIP1	1.33211	0.0132527	0.0261043
HIST1H2AH	1.3321	6.37652e-05	0.000217681
MARCH3	1.33209	0.00172845	0.00426467
UNG	1.33125	1.80889e-05	6.89396e-05
PGM3	1.33079	2.5253e-05	9.35582e-05
PSMB2	1.33012	2.07449e-07	1.20139e-06
ZNF512	1.32979	0.000278811	0.00081939
NIPAL3	1.32905	0.0189226	0.0359032
CPPED1	1.32857	0.000498802	0.00138445
SUPT16H	1.3284	1.19613e-07	7.32253e-07
TAP2	1.32793	0.00176495	0.0043432
AAGAB	1.3276	7.68074e-10	7.15913e-09
NONO	1.32731	8.56799e-11	9.57588e-10
NIF3L1	1.32723	1.63552e-11	2.09685e-10
FAIM	1.32669	0.000845782	0.00222403
FAT2	1.32588	0.00155158	0.00385956
ANKZF1	1.3254	1.12683e-08	8.39778e-08
UNC45A	1.32447	1.12884e-05	4.5205e-05
HCCS	1.32243	5.93928e-09	4.64564e-08
ZNF430	1.32225	2.3025e-08	1.61455e-07
SGO2	1.32132	0.000518525	0.00143301
MTRF1	1.32056	8.96232e-06	3.67742e-05
DHODH	1.31997	1.81486e-08	1.3004e-07
PSEN2	1.31993	0.0115431	0.0231374
CENPK	1.31971	0.00057749	0.00158005
MRPL28	1.31967	1.11545e-05	4.47437e-05
KIF22	1.31862	1.27537e-05	5.03734e-05
RPA2	1.31861	2.39447e-08	1.67343e-07
HOXA10	1.31813	0.0420175	0.0721686
MAB21L1	1.31734	9.03915e-07	4.57313e-06
AGT	1.31679	0.170347	0.24037
NAA60	1.31647	3.88677e-08	2.61753e-07
SLC50A1	1.31623	2.76173e-05	0.00010153
NAXD	1.316	3.08655e-06	1.40673e-05
CTTN	1.3133	0.000306759	0.000890883
NUP88	1.31316	6.11875e-06	2.61022e-05
UQCC1	1.31301	3.39243e-08	2.30633e-07
KIF24	1.31082	1.03614e-07	6.4445e-07
PITRM1	1.31081	0.000709395	0.00190115
TNFRSF10C	1.31077	0.0218387	0.0407385
CEP41	1.31001	6.39836e-08	4.14926e-07
OIP5	1.30996	0.000634522	0.00171561
LRP8	1.3094	0.00040294	0.00114497
IDH1	1.30938	0.000368776	0.00105488
CYBRD1	1.30909	0.0909747	0.140752
ELOVL5	1.30772	7.02921e-06	2.96161e-05
HEXIM2	1.30709	7.70755e-06	3.20943e-05
RBBP7	1.30644	4.94706e-08	3.28189e-07
UBR7	1.30623	6.50917e-08	4.20807e-07
UGDH	1.30446	0.000445631	0.00125224
TBC1D13	1.30329	2.96159e-05	0.000108307
NELFCD	1.30254	3.83013e-07	2.09623e-06
CNBP	1.3021	2.36087e-09	2.001e-08
UBL7	1.302	3.80524e-05	0.000136245
THOC6	1.30197	1.86121e-05	7.06761e-05
EXOC2	1.30169	2.99605e-07	1.67705e-06
FANCC	1.30138	6.41794e-08	4.1602e-07
SLC35F6	1.30134	0.000210758	0.000635808
WDR25	1.30127	5.34414e-05	0.000186277
MAN2B2	1.30096	0.000369717	0.00105739
NEK2	1.30094	0.000845408	0.00222398
TWNK	1.30058	5.53829e-05	0.000192295
RRP7A	1.30037	0.000661194	0.00178197
ZNF367	1.29999	0.00048394	0.001347
NAA50	1.29956	1.11533e-08	8.32691e-08
TPSB2	1.29916	0.00429983	0.00966682
ITGB8	1.299	0.113377	0.170005
PTGFRN	1.29802	0.0114789	0.0230308
MED18	1.29788	3.51206e-08	2.38185e-07
PEF1	1.29785	2.87821e-07	1.61501e-06
RIOK3	1.29704	2.9121e-06	1.3294e-05
CD96	1.29593	0.000161299	0.000501895
NARF	1.29563	0.000743599	0.00198423
GTF3C2	1.29513	1.30938e-08	9.61263e-08
ATP5G3	1.29511	9.44474e-06	3.85302e-05
ATP5F1	1.29466	1.05393e-07	6.53328e-07
TWF2	1.29439	0.00014961	0.000469279
ZNF225	1.29417	8.21111e-09	6.2788e-08
BRCA2	1.29294	1.08319e-05	4.35855e-05
ARHGAP11A	1.29293	0.000611998	0.00166115
C1orf74	1.29289	1.64324e-06	7.91166e-06
MYO1E	1.29268	0.000610233	0.00165717
IFIT3	1.29239	0.0275511	0.049898
IDH3G	1.29192	0.000133468	0.000424051
NDUFAF4	1.29154	1.27086e-05	5.02074e-05
POLR2A	1.29117	0.000104845	0.000341474
XKR9	1.28999	8.28908e-07	4.23464e-06
VDAC1	1.28955	1.95872e-05	7.41099e-05
NDC1	1.28746	4.03056e-06	1.78589e-05
POFUT1	1.2874	9.42948e-09	7.12899e-08
HDAC9	1.28722	0.00101088	0.00260562
HOXB13	1.28716	0.133248	0.195113
PLA1A	1.28637	0.294356	0.379888
WBP2	1.28589	0.00129621	0.00327744
ZNF584	1.28584	5.6047e-08	3.67879e-07
NAT6	1.28574	4.22438e-05	0.00015006
ANTXR1	1.28556	0.0247312	0.0453554
DKK1	1.28551	0.108583	0.163771
ATP5O	1.28515	3.55819e-07	1.95829e-06
EIF2B5	1.28422	1.69085e-09	1.46351e-08
FGFBP2	1.28332	0.14062	0.204176
DNASE1L1	1.28294	0.00075664	0.00201454
PRRC1	1.28139	2.02754e-08	1.437e-07
AK5	1.28093	0.0149102	0.0290209
ZNF613	1.28065	1.28219e-07	7.77539e-07
ZSCAN20	1.28059	1.06942e-11	1.42797e-10
CSGALNACT1	1.27969	0.0724375	0.115413
GEMIN5	1.27942	3.98058e-07	2.17147e-06
MAPK7	1.27927	7.92838e-05	0.0002644
PIGU	1.27926	3.29112e-06	1.48901e-05
DTX3L	1.27803	0.00244411	0.00584178
SEC61A2	1.27761	2.80184e-05	0.000102892
BMP8B	1.27671	0.137294	0.200232
ACY1	1.27573	0.000923517	0.00240563
UBAC2	1.27549	4.45741e-07	2.40183e-06
FREM1	1.2749	0.0791667	0.124712
FZD6	1.27372	0.0574824	0.0944547
DHX9	1.27335	2.40128e-12	3.61944e-11
TMEM104	1.27302	0.000270535	0.000797872
POLR3G	1.27296	0.0010614	0.0027245
ARL6IP1	1.27215	9.70951e-07	4.88865e-06
COQ6	1.27193	1.15661e-05	4.61842e-05
ZNF749	1.27183	0.0216649	0.0404684
WDR46	1.27149	0.000117748	0.000378272
UBE2C	1.27109	0.00960883	0.0196872
GEMIN7	1.27067	1.29615e-05	5.11098e-05
OGFOD1	1.26974	5.25943e-08	3.46712e-07
SAA2	1.2692	0.00195647	0.00476612
MTBP	1.26839	7.52019e-05	0.000252601
TWF1	1.26792	0.000294702	0.000861262
MANBA	1.26751	0.0160654	0.0310131
TMEM161A	1.2674	5.60293e-05	0.000194084
ZKSCAN5	1.26672	2.67818e-09	2.23485e-08
XAB2	1.26527	5.13199e-06	2.22502e-05
ZNF714	1.26497	2.24067e-06	1.04513e-05
CLCN2	1.26399	0.000297195	0.000867172
MIF4GD	1.26395	0.000236511	0.000705358
HMMR	1.2634	0.00225502	0.00542624
TP53BP1	1.26339	4.90146e-05	0.000171957
TRAF2	1.26273	0.000139092	0.000440832
SEPT9	1.26268	0.000961574	0.00249235
ST6GALNAC4	1.26196	0.019738	0.0372337
RIOK2	1.2619	9.35072e-08	5.85067e-07
TRIM5	1.26116	0.000378411	0.00107986
STKLD1	1.26017	9.26151e-09	7.01786e-08
UBE3B	1.2601	1.47347e-07	8.80766e-07
RAMP1	1.2601	0.207009	0.282778
ELP5	1.26007	1.52265e-05	5.89846e-05
CDK5RAP1	1.25952	1.26476e-08	9.34245e-08
PPP1R11	1.25922	7.83325e-05	0.000261541
GPS1	1.25872	9.71228e-05	0.000318557
CES2	1.2579	1.56336e-06	7.55971e-06
FASTKD1	1.25695	1.54112e-05	5.95622e-05
RPN2	1.25683	2.4682e-06	1.14234e-05
TSPAN11	1.25642	0.139295	0.202642
SLC35B2	1.25623	0.000356038	0.00102229
MOB2	1.25613	6.27901e-05	0.000214835
GPANK1	1.25586	1.31186e-05	5.17048e-05
LAMC1	1.25416	0.00269936	0.00638878
IBTK	1.25405	0.000194847	0.000593738
SLC25A26	1.25274	2.48469e-07	1.41592e-06
TMEM43	1.25271	1.30322e-06	6.40734e-06
BRIP1	1.25247	6.3368e-05	0.000216591
FRMD8	1.25151	0.000932126	0.00242428
HDAC1	1.25132	1.87978e-05	7.13165e-05
BEST1	1.25098	0.0500434	0.0839077
WDR76	1.25038	7.71046e-05	0.000257853
PSMC4	1.25011	1.00595e-05	4.07223e-05
IFI27L2	1.24963	0.0185433	0.0352674
LRR1	1.24772	3.27269e-06	1.48148e-05
SGCE	1.24603	0.0575821	0.0945908
GSS	1.24602	1.5001e-05	5.8219e-05
ZNF112	1.24547	1.49737e-05	5.814e-05
SGCD	1.24455	0.0340071	0.0599865
CEP152	1.24454	8.90519e-06	3.65646e-05
MRRF	1.24431	1.75817e-06	8.39977e-06
ZNF66	1.24417	1.64662e-14	3.65378e-13
C9orf116	1.2439	0.00261968	0.00622052
IPO4	1.24216	0.000232064	0.000693333
QTRT2	1.24176	7.52273e-10	7.03144e-09
DCAF8	1.24109	6.16754e-08	4.00424e-07
STRAP	1.2407	4.88227e-07	2.61142e-06
ELOVL6	1.23953	0.00253936	0.006053
TULP3	1.23856	0.000496992	0.00138011
DDX19A	1.23821	7.12525e-08	4.56229e-07
PCBP1	1.23797	4.65789e-07	2.4994e-06
C1orf216	1.23646	6.61137e-05	0.000224911
SPIN2B	1.23557	3.26713e-07	1.81362e-06
WDR53	1.23494	1.8374e-08	1.31431e-07
ARPC1A	1.23466	6.54691e-06	2.77307e-05
PSMD11	1.23394	4.47587e-08	2.98707e-07
CEND1	1.23336	0.00806384	0.0168582
BUB3	1.23237	4.5435e-09	3.63719e-08
NMD3	1.23225	9.62032e-05	0.000315789
ZFP3	1.23139	0.00501522	0.0110787
KIAA1549L	1.23125	0.0570801	0.0938616
ELP3	1.23098	7.03532e-08	4.51161e-07
ANGEL1	1.23034	1.81733e-05	6.91825e-05
C5orf15	1.23017	0.00015645	0.000488259
CPM	1.22999	0.0528257	0.0879429
COA7	1.22963	1.95619e-06	9.27955e-06
SLC7A6OS	1.22894	1.82126e-06	8.67888e-06
VSIG10L	1.22859	0.00194701	0.00474792
ADAM9	1.22839	0.00592839	0.0128399
MKRN2	1.22808	6.05302e-08	3.93905e-07
FKTN	1.22701	9.59557e-07	4.83565e-06
URB2	1.22641	1.93991e-05	7.34813e-05
GNPNAT1	1.22619	4.86586e-06	2.11786e-05
FAHD2A	1.22569	0.000205597	0.000622258
SSR1	1.22513	7.48507e-07	3.85925e-06
FGF11	1.22471	0.00259135	0.00616024
UBQLN4	1.2247	5.22147e-05	0.00018232
FBXO5	1.22462	5.69599e-05	0.000197063
SOX5	1.22333	0.0110502	0.0222883
IPO9	1.22332	2.43627e-06	1.12912e-05
TMEM184C	1.22322	9.29616e-09	7.04092e-08
SLC16A5	1.22303	0.030114	0.0538633
AMMECR1	1.22288	7.56025e-06	3.15595e-05
SH3BGRL3	1.22285	0.00600271	0.0129874
MAGT1	1.22281	5.66114e-06	2.4355e-05
ZNF100	1.22267	3.60346e-05	0.000129794
ZNF254	1.22174	0.00232623	0.00557915
ZSWIM3	1.22172	6.46779e-08	4.18779e-07
STX17	1.22143	2.06915e-07	1.19913e-06
FKBP9	1.22077	0.00345271	0.00795254
TFR2	1.21977	0.0110742	0.0223286
CXCL1	1.21953	0.156408	0.223357
CERKL	1.21952	0.0502214	0.0841432
TRIT1	1.21823	6.99426e-07	3.63419e-06
DCAF7	1.21729	1.08404e-05	4.36092e-05
TIMM21	1.21699	1.45448e-07	8.71281e-07
FAM86B1	1.21602	6.76283e-05	0.000229697
RAP1GAP	1.2137	0.0635669	0.103246
GLDC	1.21363	0.0368303	0.0643291
SUV39H2	1.21332	2.81468e-06	1.28738e-05
GLO1	1.2129	2.81697e-05	0.000103402
CAPN1	1.21253	0.00158275	0.00393419
OSBPL11	1.21189	3.10279e-07	1.73101e-06
KLHL22	1.21148	0.00320591	0.00744561
SLC39A1	1.21068	1.56843e-05	6.05287e-05
APTX	1.2102	1.039e-07	6.45747e-07
LMAN1	1.20975	0.000293211	0.000857793
ALG1L	1.20883	0.00100643	0.00259574
LURAP1	1.20802	0.0169831	0.0326013
MRPS27	1.20779	1.30941e-06	6.43588e-06
ZNF77	1.20758	3.34973e-07	1.85393e-06
ALG11	1.20746	2.06122e-07	1.19619e-06
RIPPLY2	1.20706	0.00354891	0.00815841
GPN1	1.20588	1.09064e-09	9.84222e-09
FNDC3B	1.2057	0.00117975	0.00300479
METTL2B	1.20554	9.75333e-07	4.90776e-06
CYP26A1	1.20475	0.014057	0.0275138
CHMP7	1.20437	1.70523e-06	8.17016e-06
TP53TG3D	1.20405	1.62228e-05	6.23678e-05
TKFC	1.20403	0.000807627	0.00213432
GPD2	1.20366	0.00018819	0.000576035
PRR13	1.20343	8.05262e-05	0.00026801
PCYT1B	1.20291	0.00314391	0.00731582
SLC39A9	1.20274	1.36788e-07	8.24719e-07
CTNNBL1	1.20262	1.86744e-07	1.09169e-06
SEC31B	1.20237	0.00303417	0.00708807
OAT	1.20237	0.000557691	0.00153111
MPP2	1.20228	0.0171688	0.0329303
LRRC46	1.20186	3.12162e-05	0.000113613
PSMD4	1.2018	9.40048e-06	3.83702e-05
VIPAS39	1.20171	4.7687e-07	2.55313e-06
DCTPP1	1.20165	4.23246e-06	1.86645e-05
BACH1	1.20143	0.00679808	0.0145019
ZNF18	1.20096	1.71371e-06	8.2061e-06
TMEM209	1.19949	6.05013e-05	0.000207683
OTUB1	1.19929	2.95428e-05	0.000108087
PSMB1	1.19915	7.39316e-06	3.09547e-05
C14orf1	1.19896	0.000656695	0.00177041
PRPF6	1.19852	8.98634e-05	0.000296432
AAAS	1.19777	1.33584e-05	5.24522e-05
APRT	1.19709	0.000646382	0.00174418
KBTBD6	1.19669	0.000110865	0.00035871
NASP	1.19663	3.05802e-05	0.000111565
PSMB3	1.19621	4.89979e-05	0.000171935
KDM4D	1.19593	4.3885e-06	1.92714e-05
PSRC1	1.19583	0.00180585	0.00443265
PIGN	1.19511	8.19264e-06	3.38949e-05
PGAP3	1.1951	4.49275e-05	0.00015865
SUPT5H	1.19459	1.92069e-06	9.12149e-06
SLC29A1	1.19404	0.0275139	0.0498361
MRPL3	1.19395	6.03515e-08	3.92895e-07
BCOR	1.19374	2.35699e-06	1.09511e-05
KAT7	1.19165	2.28874e-06	1.06547e-05
FAM126A	1.19158	0.00199679	0.00485516
ERI2	1.19151	3.36494e-06	1.51831e-05
RDM1	1.19055	2.53032e-06	1.16947e-05
MRPS9	1.1902	8.86596e-08	5.57865e-07
POC5	1.18994	9.08734e-06	3.72465e-05
PPARGC1B	1.18977	0.00293196	0.00687329
CCL28	1.18866	0.00819232	0.0170969
ZNF14	1.18811	0.000164911	0.000511424
WIPF1	1.1879	0.0687172	0.110186
SERINC3	1.18767	7.00398e-05	0.00023707
DCAKD	1.18751	0.000752963	0.00200634
GSTO1	1.18691	0.012432	0.0246913
ZNF665	1.18578	3.10758e-09	2.56249e-08
ZNF527	1.18557	2.59329e-10	2.63279e-09
NEIL3	1.18537	0.000163496	0.000508071
ZNF682	1.18489	0.000112185	0.000362348
SLC2A1	1.18486	0.0164852	0.0317503
POLH	1.18442	0.000338156	0.000974454
GJB1	1.18242	0.171456	0.24159
ATP6V1B2	1.18236	0.00362537	0.00831246
FBXO38	1.18171	7.38419e-07	3.81194e-06
MID1	1.18149	0.0360063	0.0630742
POT1	1.18082	2.44062e-05	9.06417e-05
VPS33A	1.18038	1.28326e-07	7.77905e-07
NARS	1.18024	1.62652e-06	7.8334e-06
GTF2H1	1.1802	1.4492e-05	5.64135e-05
TMEM107	1.17974	0.000336986	0.00097192
SUCLA2	1.17869	3.03565e-05	0.000110845
GMNN	1.17852	0.000417289	0.00118033
PLPP7	1.1768	0.0501032	0.0839956
PIR	1.17652	0.156389	0.22335
CCT4	1.17613	1.17465e-07	7.20159e-07
ZNF888	1.17604	0.000874264	0.00228981
SART3	1.17545	4.09962e-08	2.74692e-07
TTC23	1.17536	2.18043e-07	1.25536e-06
SENP2	1.1753	9.2068e-08	5.76925e-07
MOB3A	1.17525	1.62229e-05	6.23678e-05
TAGLN2	1.17496	0.00924241	0.0190203
KARS	1.17477	2.66662e-07	1.51084e-06
FAM98A	1.17436	2.72977e-05	0.000100488
NDUFA8	1.17368	0.000646445	0.00174418
PARP3	1.17338	0.00294926	0.00691093
PRIM1	1.17204	0.000579361	0.00158439
BNIP3L	1.17186	0.000381307	0.00108756
TRO	1.17152	0.0452098	0.0768236
NCBP1	1.16992	2.73433e-06	1.25372e-05
PCOTH	1.16923	0.00102142	0.00262914
CDCA7	1.16891	0.0494877	0.0831972
ASNA1	1.16887	4.38805e-05	0.00015528
VRK3	1.16785	2.61863e-06	1.20529e-05
IFT172	1.16746	0.00314939	0.00732756
USP4	1.16702	3.07111e-08	2.10499e-07
URGCP	1.16674	2.83432e-06	1.29601e-05
SLC17A5	1.16652	0.00667373	0.0142712
C10orf107	1.16613	9.41497e-07	4.75179e-06
OPA1	1.16594	2.70973e-06	1.24309e-05
MCFD2	1.16589	2.01371e-05	7.59327e-05
NUDCD3	1.16585	9.51598e-06	3.87566e-05
OSBPL1A	1.16584	0.0001201	0.000385457
ACSS2	1.16377	0.00378897	0.00864611
SCG2	1.16372	0.182312	0.254677
TRMT2B	1.16364	1.51125e-05	5.86107e-05
TRMT10C	1.16351	8.26525e-06	3.41531e-05
FICD	1.16325	0.000188186	0.000576035
VCL	1.16226	0.000140818	0.00044588
TMUB2	1.16213	2.11219e-06	9.93228e-06
FARP2	1.16043	0.00447943	0.0100242
NXF1	1.15969	1.63749e-08	1.18141e-07
CCDC94	1.15911	0.000128925	0.000410709
IGSF3	1.15875	0.03975	0.0687185
PARK2	1.15808	7.49281e-06	3.13093e-05
FAM134C	1.15788	4.79979e-06	2.09128e-05
PRDX4	1.15768	9.68829e-05	0.000317833
ATG7	1.15766	9.66734e-08	6.03524e-07
ATP10B	1.15749	0.0613255	0.0999744
ZADH2	1.15732	5.81517e-05	0.00020073
ELOVL2	1.15523	0.220748	0.298524
SCMH1	1.155	1.44772e-06	7.0494e-06
RNF157	1.15354	0.039038	0.0676273
FASTKD3	1.15335	7.99219e-06	3.3164e-05
USP37	1.15231	3.85604e-05	0.000137883
DUSP10	1.1523	0.112598	0.169003
RARS	1.15209	1.99078e-06	9.4276e-06
LRRC34	1.15158	0.0104562	0.0212232
ABCC10	1.15153	0.000176008	0.000542118
PASK	1.15131	1.3137e-05	5.17164e-05
FSTL1	1.15073	0.0871524	0.135591
SS18	1.15039	3.68353e-06	1.6474e-05
SRPK1	1.15032	0.000135925	0.000431612
MAPRE2	1.15018	0.000166023	0.000514205
C1orf174	1.14953	4.96167e-07	2.64459e-06
LYRM9	1.1493	0.0037977	0.00866484
INSIG2	1.14869	0.000155526	0.000485738
SPATA18	1.14766	0.0503881	0.0844056
EPRS	1.14691	9.78399e-06	3.97031e-05
MTHFD1	1.14624	6.38031e-06	2.70868e-05
ZNF429	1.14617	9.24822e-05	0.00030453
SPDL1	1.14523	0.00029875	0.000871406
DERA	1.14284	0.00216871	0.00523663
TIMM22	1.14131	7.67342e-05	0.000256822
SCAMP2	1.14061	4.42801e-05	0.000156528
METTL21B	1.1399	0.000314741	0.000912324
SLC25A40	1.13964	5.24555e-05	0.000183069
TBL2	1.13947	0.000136553	0.00043344
STK24	1.1383	0.00149432	0.00373101
TOM1L1	1.13827	0.00417472	0.0094248
ACTR8	1.13787	4.88568e-09	3.88879e-08
ASL	1.13755	0.00104932	0.00269639
S100A2	1.13661	0.0699319	0.11189
IFNAR1	1.13649	1.41334e-05	5.51461e-05
DHRS7B	1.13573	0.000188117	0.000576023
TIPARP	1.13552	0.000106722	0.00034678
MYL6B	1.13472	0.00040372	0.0011468
SLC30A6	1.13439	8.8616e-07	4.48875e-06
PSMD14	1.13397	1.41301e-05	5.51458e-05
NOL6	1.13392	0.000241116	0.000718324
ACSL4	1.13376	0.00403852	0.00915437
DHX40	1.13343	2.71221e-05	9.98635e-05
SUCLG2	1.13316	7.45162e-05	0.000250599
HSD17B10	1.13299	0.000230077	0.000688502
BCL2L2-PABPN1	1.13283	0.00249412	0.00595196
ATP6V0E2	1.1326	0.0491651	0.0827321
MRM3	1.13234	0.000425454	0.00120059
PXN	1.13205	0.00174213	0.00429398
CD83	1.13204	0.0120525	0.0240289
EREG	1.13182	0.0216799	0.0404844
NARS2	1.13087	0.0190335	0.036063
EIF2B3	1.13084	8.15646e-07	4.17327e-06
C12orf10	1.13063	0.000203631	0.000616979
JMJD6	1.13046	4.42892e-05	0.000156528
ABCG5	1.12977	1.85876e-06	8.84392e-06
NR1D1	1.12977	0.0013313	0.00336059
IFI35	1.12862	0.0294603	0.0528636
MVK	1.12845	0.00211082	0.00510643
SRA1	1.12821	6.01673e-05	0.000206736
COLGALT2	1.12804	0.0491387	0.0827102
THAP4	1.12798	0.000142726	0.000451151
C6orf89	1.1279	8.91747e-06	3.66041e-05
ERO1A	1.12745	0.000643306	0.00173683
TMEM38B	1.12659	0.00149231	0.0037282
NCL	1.12658	1.11525e-06	5.55829e-06
GHITM	1.12653	1.47151e-06	7.15069e-06
PUDP	1.12616	0.000787664	0.00208585
ZNF614	1.12565	0.000201685	0.000611969
ZNF484	1.12557	1.4351e-06	6.99406e-06
FIP1L1	1.12526	7.69626e-08	4.88862e-07
TUB	1.12389	0.0759089	0.120135
EIF4G2	1.12261	2.36272e-05	8.80416e-05
INTS2	1.12198	6.35144e-05	0.000216958
DDX31	1.12093	3.0894e-06	1.40765e-05
CTR9	1.12075	1.44163e-06	7.02197e-06
PRIMPOL	1.12046	0.000100729	0.000329287
MADD	1.12041	1.79386e-05	6.83982e-05
FN3KRP	1.12035	0.000293347	0.000858039
UBOX5	1.1198	0.000103699	0.000338139
NXPE3	1.11965	0.00438013	0.00982706
ZNF765	1.11952	3.12441e-08	2.13801e-07
ZNFX1	1.11805	5.37606e-05	0.000187272
METTL13	1.11791	8.94547e-05	0.000295201
IGF2BP2	1.11708	0.0534706	0.0888574
LAMP2	1.11646	0.00100929	0.00260231
GAGE2A	1.11595	0.242155	0.3227
ARF1	1.11586	3.30223e-06	1.49363e-05
ARL6	1.11583	7.96178e-05	0.000265303
DCAF1	1.11521	1.55014e-06	7.50445e-06
ALG8	1.11376	0.0208485	0.0391093
ESD	1.11365	5.50217e-06	2.37077e-05
UBE4A	1.11333	0.000594529	0.00161988
CLCN6	1.11307	1.17276e-05	4.67845e-05
ST3GAL1	1.11285	0.0226624	0.0420314
HIRIP3	1.11198	0.000265183	0.000784022
SIL1	1.1116	0.00457937	0.0102157
ENOX2	1.11035	0.000305492	0.000887514
SLFN5	1.10987	0.00794835	0.0166584
PMS2	1.10967	9.82501e-06	3.98406e-05
ZNF30	1.10964	4.32771e-05	0.000153372
BRCC3	1.10921	1.28477e-05	5.07326e-05
PLSCR1	1.10884	0.0281617	0.0508498
CALD1	1.10852	0.00041807	0.00118234
CEP70	1.10844	0.00933352	0.0191842
GCDH	1.10807	4.99398e-05	0.000174873
TMEM2	1.10707	0.0193859	0.0366533
XRCC4	1.10675	0.000565448	0.00155116
ARL14EP	1.10606	4.4091e-05	0.000155959
RAE1	1.1044	2.12522e-05	7.97957e-05
UBE2T	1.10427	0.00321601	0.00746387
ACAD11	1.10392	0.000728568	0.00194817
CNP	1.10353	0.0042816	0.00963276
NIT2	1.10336	8.07165e-07	4.13493e-06
PLP1	1.10313	0.0741869	0.117841
SAMM50	1.10281	0.0123632	0.0245722
METTL3	1.10223	2.6697e-06	1.22711e-05
GPAT4	1.10198	0.0017963	0.00441255
IRX6	1.10077	0.167218	0.236574
NEU1	1.10009	0.00197396	0.00480382
MKLN1	1.09984	4.1776e-06	1.8447e-05
MC1R	1.09983	0.0838363	0.131152
DGKG	1.09978	0.00189827	0.00463718
BLOC1S5	1.09956	0.000176635	0.000543851
CHORDC1	1.09934	0.000413917	0.00117238
NTHL1	1.09846	0.000976463	0.00252663
NADSYN1	1.09823	0.000994213	0.00256779
SGO1	1.0981	0.000416306	0.00117835
BSDC1	1.09804	5.18407e-06	2.24411e-05
SEC23B	1.09756	1.32239e-05	5.19852e-05
FAR2	1.09721	0.0455399	0.077361
MRM2	1.09715	6.998e-06	2.94995e-05
LPCAT2	1.09672	0.0443844	0.0755782
NDUFS1	1.09639	1.54648e-07	9.21443e-07
UBR4	1.09634	1.6863e-05	6.46209e-05
NPC1	1.09604	0.00366321	0.00838846
TIMM8A	1.09446	2.98986e-07	1.67414e-06
HDDC2	1.09394	0.000307185	0.000891965
TBK1	1.09341	3.21508e-05	0.00011676
AASDHPPT	1.0927	0.000161149	0.000501523
CYFIP1	1.09244	5.03571e-07	2.68234e-06
METAP1	1.09226	7.47909e-06	3.12675e-05
RNF25	1.0918	2.87969e-05	0.000105546
FAM32A	1.09164	1.44204e-08	1.05173e-07
SEC13	1.09133	0.000207496	0.000627099
TBC1D16	1.09025	0.038835	0.0673454
NUP62	1.09016	8.36328e-07	4.26474e-06
SWI5	1.08967	0.00139905	0.00351146
TMBIM1	1.08895	0.00180607	0.00443265
NEDD1	1.08883	6.33327e-05	0.000216514
TAPBP	1.08813	0.00362747	0.00831615
ATP4B	1.08723	1.21553e-10	1.32403e-09
CCDC77	1.08703	3.95849e-05	0.000141244
ELAC1	1.08656	2.5571e-06	1.18054e-05
CABYR	1.086	0.00773372	0.0162513
CCDC113	1.08599	0.00327669	0.00758996
POLR3K	1.08573	1.60183e-05	6.16663e-05
SRBD1	1.08545	1.54918e-05	5.98322e-05
C17orf49	1.08508	0.00205989	0.00499478
POLR1A	1.08495	3.01923e-05	0.000110318
EFCAB9	1.08455	1.02459e-13	1.94579e-12
RARG	1.08428	0.00480596	0.0106614
CRCP	1.08408	8.21264e-07	4.19944e-06
EIF2S1	1.08289	1.75652e-06	8.39425e-06
MINDY4	1.08223	0.00424476	0.00956228
SENP1	1.08135	2.06101e-06	9.73264e-06
SF3B2	1.08009	5.01594e-06	2.17971e-05
PRMT7	1.07959	0.000815831	0.00215396
PRNP	1.07839	0.0281945	0.0509034
PEX11B	1.07817	4.72186e-05	0.000166072
TMEM53	1.07769	0.0012287	0.00311854
PNO1	1.07767	1.83642e-07	1.07657e-06
LAIR2	1.07696	0.000238752	0.000711537
BMS1	1.07679	3.84385e-07	2.10237e-06
CUL9	1.0766	0.000103946	0.000338878
ALDH3A1	1.07623	0.00199958	0.00486051
SARDH	1.07594	0.0652511	0.105521
NKIRAS2	1.07528	4.91601e-06	2.13858e-05
POLD1	1.07475	0.00554675	0.0121137
SUPT6H	1.0745	1.92913e-05	7.30894e-05
SEC23A	1.07442	0.000305433	0.000887495
SERPINB6	1.07417	0.0203217	0.0382414
ZNF883	1.07364	0.0134277	0.0264024
EHHADH	1.07307	0.00172557	0.00425819
ZNF79	1.07266	2.33352e-05	8.70309e-05
MRPS10	1.07253	5.8129e-06	2.49373e-05
PCMT1	1.07224	0.000432107	0.00121772
IER3	1.07208	0.256165	0.338485
DYRK3	1.07203	0.00222546	0.0053613
RND3	1.07196	0.115333	0.172504
[truncated: 14,732 more rows]

## Sheet: CTC.vs.CCLE 
Gene	Log2FoldChange	P value	FDR-adjust P value
HIST1H4C	7.28706	9.15854e-34	1.34795e-29
SPARCL1	5.52235	1.53207e-07	8.35147e-07
MLANA	5.32798	0.000963345	0.00244541
CCL18	5.00946	5.78728e-08	3.44987e-07
APOD	4.63913	0.00102757	0.00259412
F2RL2	4.5763	2.16879e-05	7.6529e-05
RNASE1	4.55806	0.00240334	0.00557835
SAA1	4.47576	0.000101461	0.00031208
CCL3	4.4242	2.17525e-17	1.52454e-15
CD36	4.39802	0.00034096	0.000947018
FCRLA	4.21743	1.44135e-05	5.27576e-05
CTSK	4.20269	0.000286865	0.000808209
TYR	4.06794	0.0125549	0.0245755
HTR2B	4.06077	6.03631e-05	0.000193928
ICAM1	4.05873	3.30396e-06	1.3725e-05
FGL2	4.05757	0.001221	0.00302944
SPP1	3.97336	0.00808717	0.0165361
ASB11	3.93798	5.23456e-16	2.43036e-14
DCT	3.90617	0.0207342	0.0384292
SPATS1	3.90518	8.24096e-06	3.15204e-05
DNASE2B	3.77163	5.74645e-07	2.7867e-06
IL24	3.74	0.00138511	0.00339314
SDCBP	3.68077	1.15035e-10	1.26918e-09
NUPR1	3.65924	3.49594e-05	0.000118447
IFITM1	3.64138	0.000141641	0.000423714
ANGPT2	3.60507	2.08587e-07	1.1083e-06
FDCSP	3.59621	4.15001e-05	0.000138252
POLR2I	3.57926	1.48113e-23	6.60583e-21
CXCL10	3.57305	3.75114e-12	5.94287e-11
CRYAB	3.54933	0.00423648	0.00929525
PLA2G4C	3.52384	1.27405e-13	3.03913e-12
LY96	3.49003	0.000188927	0.00055215
TSPAN7	3.47346	8.78599e-05	0.000273329
LCN2	3.44327	0.00315548	0.00712307
SAA2	3.43313	5.62606e-06	2.22617e-05
IFITM2	3.34722	0.00542234	0.0115845
SERPINF1	3.33949	0.00166828	0.00400028
CPVL	3.33487	0.000401921	0.00110096
IFITM3	3.33354	0.000115259	0.000350708
SAT1	3.30156	4.70113e-07	2.32419e-06
AGMO	3.26501	0.000163577	0.000484313
TRAPPC6A	3.26071	4.29364e-11	5.21832e-10
FABP3	3.25943	9.36275e-06	3.54153e-05
P2RX7	3.21215	2.10249e-05	7.43144e-05
CHCHD6	3.17479	4.79533e-07	2.3652e-06
HIST1H2AC	3.17083	1.08306e-06	4.95508e-06
TRIM51	3.15619	1.64886e-05	5.95967e-05
FDPS	3.15408	1.64983e-14	4.9254e-13
NSG1	3.08806	0.00479468	0.0103838
PMEL	3.08649	0.152751	0.217989
MGST3	3.07837	2.62892e-14	7.38406e-13
FABP7	3.06301	0.0028679	0.00653313
IL1B	3.05933	0.0189071	0.0353994
EIF4EBP3	3.05276	9.16904e-13	1.71039e-11
RAB38	3.03534	0.00131969	0.00324857
LOXL4	3.02538	0.096228	0.147391
UQCR11	3.01728	2.77995e-21	6.1993e-19
SELENBP1	3.01326	0.00324645	0.00731494
RGS2	2.95869	4.36505e-05	0.00014463
PI3	2.9533	6.98033e-06	2.70573e-05
ZNF880	2.94972	3.92206e-08	2.4183e-07
ROPN1B	2.93378	1.47716e-07	8.08809e-07
CDKN1A	2.93054	0.00119564	0.00297353
GLUL	2.89159	0.000374015	0.00103143
SHISA2	2.88865	0.00305221	0.00691114
VAMP5	2.88764	0.0219646	0.040465
TMBIM4	2.8832	2.23221e-18	2.01556e-16
MSMO1	2.87519	3.42546e-09	2.67316e-08
RTP4	2.87498	1.28016e-06	5.75486e-06
CPM	2.86835	1.52227e-05	5.54026e-05
RGS5	2.85605	0.00173214	0.00413992
CYSTM1	2.85266	1.77088e-10	1.86838e-09
MGP	2.85234	0.0346124	0.0604372
BCHE	2.82315	0.00487578	0.0105485
HHLA3	2.81607	3.80881e-11	4.7068e-10
NOP16	2.8082	1.03344e-14	3.32099e-13
FAM162A	2.80799	6.12764e-12	9.15656e-11
IL1RAPL1	2.80614	0.000138662	0.000415478
ATP5O	2.80043	1.51787e-19	1.99465e-17
CTSS	2.79765	1.44173e-05	5.27584e-05
ATP5G1	2.79718	5.06315e-15	1.76586e-13
COX6C	2.7947	6.55104e-20	9.18268e-18
TMEM35B	2.7795	3.26446e-14	8.98062e-13
ZFP82	2.77484	2.55059e-10	2.61418e-09
ZNF429	2.77477	2.14564e-12	3.59676e-11
BATF2	2.76505	5.15955e-10	4.86472e-09
NDUFS8	2.74631	2.36468e-16	1.22117e-14
UQCRQ	2.74403	5.79467e-18	4.66044e-16
APOC1	2.73685	0.00594603	0.012581
TIMM10	2.73681	1.58457e-13	3.65544e-12
CYTL1	2.72978	0.0492838	0.0824365
NDUFA1	2.71921	2.26041e-14	6.47252e-13
COA3	2.71761	2.44843e-20	3.83361e-18
GPNMB	2.71603	0.00877943	0.0178056
SSX1	2.70301	0.00205997	0.00485409
SLC18B1	2.69607	5.85767e-05	0.000188774
MS4A7	2.69588	3.2662e-10	3.24591e-09
NDUFB8	2.69573	5.86948e-19	6.30562e-17
IDI1	2.68281	1.132e-10	1.25269e-09
TF	2.67656	0.0294108	0.0523673
QPCT	2.66658	0.0289735	0.0517263
BCKDHA	2.65533	2.60817e-14	7.33977e-13
ALDOA	2.65332	8.18587e-17	4.81919e-15
COX7A2	2.64122	1.88305e-15	7.71997e-14
GPX7	2.63333	0.00335378	0.00753371
C8orf48	2.6291	2.18037e-05	7.69192e-05
ACAT2	2.62017	1.85343e-05	6.62749e-05
CDKAL1	2.61925	2.35167e-08	1.53082e-07
MAGED2	2.61203	9.65563e-09	6.81549e-08
PTPRZ1	2.60509	0.0073219	0.0151481
APOO	2.58237	1.7508e-13	3.98274e-12
SWSAP1	2.58083	3.36918e-17	2.20389e-15
DDIT4L	2.57529	5.91295e-05	0.000190472
COL15A1	2.56925	0.0127865	0.0249623
ATP5J	2.56253	7.56413e-17	4.48907e-15
PSMB3	2.56196	3.03253e-18	2.61011e-16
FAM174B	2.56034	0.00022791	0.000654896
PCOLCE	2.55027	0.00743137	0.0153487
CFH	2.542	8.70947e-05	0.000271178
ENPP2	2.54165	0.011514	0.0227131
NDUFA4	2.54145	1.34917e-13	3.19759e-12
TMEM97	2.53425	7.3086e-09	5.29631e-08
EDNRB	2.53236	0.00999935	0.0199878
FADS2	2.53123	0.000595678	0.00157712
ITIH6	2.53066	0.0218345	0.0402757
LAMTOR5	2.52883	7.0494e-18	5.51878e-16
HSD17B14	2.52325	0.00118852	0.00296034
ACY1	2.51594	3.52192e-10	3.47191e-09
C3	2.51133	0.0104046	0.0207218
CCDC167	2.50953	9.07125e-12	1.29371e-10
GPM6B	2.50728	0.00808483	0.0165361
COX14	2.50426	5.46843e-12	8.29735e-11
FTL	2.50218	7.2612e-06	2.80573e-05
EEF1AKMT1	2.50188	2.57588e-09	2.06154e-08
SLIRP	2.4986	3.0175e-15	1.13876e-13
HIST1H1B	2.49678	5.00076e-16	2.32915e-14
HIGD2A	2.48571	1.35106e-14	4.16875e-13
PLA1A	2.48346	0.0343666	0.0600722
TMEM216	2.48168	3.54851e-05	0.000120117
CHI3L1	2.47428	1.60197e-05	5.80103e-05
SLC50A1	2.47159	1.0314e-13	2.48854e-12
AIMP2	2.46654	2.08917e-15	8.40119e-14
COX6A1	2.46607	3.0177e-12	4.91681e-11
NDUFA13	2.46218	6.41258e-20	9.07504e-18
SGCD	2.449	3.34547e-05	0.000113741
ATP5G3	2.44296	2.99941e-11	3.82873e-10
MGST1	2.44141	0.0145357	0.0279728
C14orf1	2.43874	4.83293e-11	5.82564e-10
TROVE2	2.43766	5.22373e-14	1.37291e-12
GEMIN7	2.43396	3.31598e-21	6.87389e-19
WDR83OS	2.43385	1.04625e-17	7.89679e-16
LPXN	2.43361	0.00298432	0.0067741
UQCR10	2.43004	1.63432e-15	6.81413e-14
PTTG1	2.42726	5.94644e-08	3.54044e-07
SDHB	2.4269	3.66038e-14	9.98273e-13
MGMT	2.42634	0.000883822	0.00226464
COX7B	2.42426	7.84374e-12	1.13963e-10
TECR	2.42383	2.53283e-13	5.54735e-12
ACOT8	2.41794	1.84708e-14	5.40463e-13
TMEM205	2.41112	8.04483e-13	1.52779e-11
CCDC51	2.40931	3.68515e-12	5.84461e-11
ZMYND12	2.40887	2.8353e-09	2.24355e-08
TUBA1A	2.40745	6.05298e-06	2.37777e-05
C19orf70	2.40514	5.4559e-12	8.28689e-11
LAMTOR2	2.40509	1.69998e-17	1.21458e-15
EXOSC5	2.40278	1.19323e-11	1.66781e-10
KCNJ13	2.40201	3.06767e-11	3.88554e-10
EFNA1	2.40148	0.000635594	0.00167317
CAPG	2.40064	0.0775617	0.122537
ASB9	2.39681	0.000160248	0.000475369
NDUFA7	2.39577	9.26247e-16	4.05729e-14
TNFRSF14	2.3925	0.00321367	0.00724553
NDUFA3	2.38226	4.6133e-13	9.39006e-12
PYCARD	2.38122	0.0586228	0.0958572
RXRG	2.37273	0.0109031	0.0216065
ST3GAL6	2.36927	0.000188715	0.00055164
HSD17B7	2.36658	9.01949e-08	5.17943e-07
DHCR7	2.36316	0.00152168	0.00368659
ACO2	2.35749	1.12734e-08	7.85986e-08
TGDS	2.353	1.25594e-09	1.07595e-08
TMEM173	2.35003	2.73072e-05	9.44776e-05
SOD2	2.34793	4.05592e-07	2.03252e-06
ZNRD1	2.3476	1.9417e-12	3.31147e-11
ROPN1	2.34461	3.21554e-05	0.000109653
MRPL13	2.33592	1.6397e-19	2.11694e-17
MRPL22	2.33086	1.1321e-16	6.38403e-15
LGALS3	2.32938	0.00513368	0.0110432
ALX1	2.32856	4.66664e-07	2.30942e-06
G6PC3	2.32561	8.76536e-13	1.65184e-11
ZNF595	2.32186	3.89966e-05	0.000130711
NDUFS4	2.3163	4.43195e-08	2.70213e-07
PRAME	2.3147	0.0324731	0.0571561
PCDHGA12	2.30813	0.00893194	0.0180826
NSDHL	2.30129	3.50371e-11	4.35905e-10
COX20	2.30016	2.07928e-12	3.50547e-11
EEF2KMT	2.29826	3.00886e-14	8.33982e-13
SCAMP3	2.2957	6.611e-12	9.7888e-11
COX6B1	2.29323	1.41191e-13	3.31957e-12
ATP5G2	2.28936	2.8636e-15	1.09188e-13
ODF3L1	2.28724	1.18352e-12	2.15272e-11
HIST1H4I	2.28292	3.10826e-13	6.67998e-12
C14orf2	2.28251	2.24413e-16	1.17541e-14
SDHD	2.28056	2.25172e-09	1.82393e-08
TYRP1	2.28002	0.180091	0.250571
MR1	2.27956	1.35016e-07	7.46214e-07
LOXL3	2.2782	0.0558567	0.091978
CA14	2.27756	0.0483481	0.0810833
NDUFC1	2.27717	1.252e-18	1.27082e-16
ZNF766	2.27316	2.36889e-17	1.63687e-15
GALM	2.27138	0.0185131	0.0347414
GPR143	2.27111	0.0731651	0.116567
GSTA4	2.27062	2.1239e-05	7.5017e-05
TMEM177	2.27008	6.58494e-14	1.68259e-12
PABPC5	2.26954	1.25255e-06	5.64106e-06
ATP5I	2.26896	1.06099e-12	1.95196e-11
PSMB6	2.26777	5.93207e-18	4.71936e-16
METTL18	2.26728	1.96332e-16	1.03943e-14
SC5D	2.2671	8.28925e-09	5.93391e-08
MRPL15	2.26416	7.07454e-16	3.16484e-14
ATP6V0A1	2.26275	7.66247e-09	5.53408e-08
FBXO6	2.25643	4.707e-06	1.88819e-05
ZNF468	2.25608	1.45113e-07	7.95448e-07
CUEDC2	2.25507	6.85349e-12	1.00809e-10
MPV17	2.25248	7.86168e-15	2.60018e-13
UXT	2.2429	3.95968e-15	1.4249e-13
C11orf1	2.24188	2.58912e-11	3.34562e-10
SNUPN	2.2389	4.45275e-16	2.12089e-14
LPL	2.23785	0.0178967	0.0337351
MPC1	2.23776	1.8056e-08	1.20466e-07
ATP5F1	2.23489	3.53781e-15	1.3019e-13
TIMM13	2.22595	4.66904e-14	1.24944e-12
PTCHD4	2.22524	0.000833733	0.00214638
MRPL14	2.22439	8.88313e-15	2.89893e-13
SDHAF4	2.22099	3.90682e-09	3.00735e-08
HIST1H4H	2.21773	1.51765e-05	5.52617e-05
TPI1	2.21632	5.24273e-14	1.37545e-12
UQCC2	2.2158	1.45673e-13	3.39244e-12
ACOX2	2.21543	2.9761e-06	1.24722e-05
MDH1	2.21517	1.99384e-11	2.62481e-10
HILPDA	2.21232	1.27538e-11	1.75758e-10
DNAJC15	2.21166	2.08868e-08	1.37606e-07
MAD2L1BP	2.21032	2.07242e-10	2.16479e-09
NDUFV2	2.20952	1.57242e-14	4.77172e-13
ZNF28	2.2092	6.86022e-09	4.99845e-08
LDLR	2.20899	0.00355789	0.00794372
COX4I1	2.20747	2.43074e-17	1.67176e-15
RPS27L	2.20702	5.09727e-08	3.06962e-07
TMX2	2.20474	1.92337e-13	4.3551e-12
PNMAL1	2.20474	0.0179025	0.0337416
NDUFA9	2.20401	1.31451e-11	1.80476e-10
MGST2	2.20166	0.0022257	0.00520214
ATP5B	2.19995	5.41279e-13	1.07221e-11
TRAF3IP2	2.19909	2.13648e-06	9.20511e-06
MRPL55	2.19029	9.19964e-17	5.33072e-15
PDHB	2.18927	3.12997e-15	1.17818e-13
ZNF610	2.18807	4.90376e-07	2.41302e-06
PI15	2.18733	0.0169522	0.0321649
MRPS18A	2.18557	4.6608e-12	7.22841e-11
ATP6V0D1	2.18536	5.82293e-11	6.88922e-10
PSMB1	2.17963	2.24025e-14	6.4273e-13
ALG14	2.17932	1.34655e-15	5.66245e-14
HIST1H1E	2.17612	6.07409e-10	5.62963e-09
CUBN	2.17546	0.000143804	0.000429486
HSBP1	2.1742	3.45275e-12	5.49973e-11
ATRAID	2.17301	8.45776e-14	2.08861e-12
HMGCL	2.17261	1.18605e-12	2.15272e-11
FAM213A	2.17201	0.000226446	0.000651072
PHPT1	2.17158	1.90946e-12	3.26025e-11
LIN7C	2.17074	2.55345e-13	5.5842e-12
AAMDC	2.16952	4.19241e-08	2.57099e-07
PSENEN	2.1695	8.62152e-14	2.12193e-12
SULT1A1	2.16363	0.00231328	0.00538971
TIMP1	2.16297	4.89339e-05	0.000160331
ABCB5	2.16287	0.0154267	0.0294999
NDUFB2	2.16184	5.25731e-12	8.035e-11
CYB5D2	2.16018	6.52391e-08	3.8423e-07
NBDY	2.15991	8.25324e-07	3.86359e-06
NME5	2.15692	3.9567e-07	1.9904e-06
PSMB10	2.15509	2.46324e-11	3.19136e-10
TIMM10B	2.15218	6.14415e-13	1.19774e-11
GSTP1	2.15196	6.71105e-08	3.94462e-07
S100A3	2.15127	0.0122296	0.0239866
CYP1A1	2.15035	0.00170653	0.00408734
NDUFB9	2.15012	3.96776e-13	8.2366e-12
ZBTB3	2.1469	5.75263e-18	4.66044e-16
SH3BGRL	2.14502	1.51456e-06	6.72033e-06
TEN1	2.14485	3.09622e-12	5.00222e-11
ZNF490	2.1438	1.82546e-18	1.70603e-16
SKP1	2.14209	1.34278e-15	5.66245e-14
ZNF420	2.1409	1.41061e-08	9.65789e-08
CCNG1	2.13665	8.9229e-10	7.91498e-09
ZNF816	2.13388	1.59473e-06	7.03785e-06
SGF29	2.13312	8.98295e-10	7.95015e-09
PIGF	2.13261	4.03702e-14	1.09022e-12
TMEM60	2.13034	7.14486e-12	1.04844e-10
NDUFA12	2.12784	1.69378e-13	3.85942e-12
ZNF415	2.12732	2.34293e-05	8.22008e-05
MILR1	2.12637	0.00373873	0.00830763
C12orf57	2.12553	1.68196e-06	7.38959e-06
C20orf196	2.1242	1.23256e-11	1.70583e-10
MUL1	2.12303	1.55167e-16	8.45724e-15
CYCS	2.12207	2.97931e-10	2.99313e-09
POLR3K	2.12086	1.83853e-11	2.44219e-10
C1QTNF3	2.11957	0.0168291	0.0319533
COX7C	2.11892	4.47806e-13	9.16663e-12
ARHGEF3	2.11644	7.53685e-06	2.90462e-05
ZNF563	2.11488	5.9264e-10	5.51358e-09
GPI	2.11264	3.49169e-09	2.72196e-08
PAEP	2.11234	0.0341453	0.0597492
HIST1H1D	2.11215	4.27373e-08	2.61107e-07
COMMD6	2.11058	1.62049e-14	4.85752e-13
DAZAP2	2.10526	2.35079e-12	3.90948e-11
MRPS14	2.10262	2.92987e-17	1.95121e-15
ATP6V1A	2.10177	2.35126e-16	1.21851e-14
WARS	2.10031	2.35622e-05	8.25911e-05
HSPB2	2.0917	0.00401665	0.00886048
SQRDL	2.09103	0.012032	0.0236494
CCDC86	2.08919	6.03467e-12	9.03543e-11
KRTCAP2	2.08854	2.30937e-13	5.12658e-12
CHRM1	2.08842	3.38141e-07	1.72147e-06
NELL1	2.08337	0.0159833	0.0304718
SLC43A3	2.08128	5.10072e-06	2.03118e-05
ORMDL2	2.07999	1.02147e-13	2.46863e-12
AGTRAP	2.07769	5.39271e-12	8.21635e-11
AGT	2.0763	0.000407665	0.00111524
ZNHIT1	2.07561	2.46303e-12	4.08691e-11
PIGBOS1	2.07482	1.99534e-14	5.78097e-13
ZNF14	2.07407	1.91876e-11	2.53504e-10
ZNF254	2.07283	1.96369e-05	6.99287e-05
ZP3	2.07266	1.00846e-06	4.63828e-06
ALG8	2.07255	2.10836e-09	1.71821e-08
GGPS1	2.07249	2.39795e-12	3.98342e-11
ZDHHC4	2.07215	6.48251e-12	9.6179e-11
TRPM2	2.07058	0.00129727	0.00319766
KCTD14	2.0696	0.00927751	0.0186896
RNASEK	2.06471	8.36662e-12	1.20844e-10
NDUFC2	2.06246	1.99395e-09	1.63402e-08
ANGPTL7	2.05645	1.22201e-05	4.54065e-05
CD70	2.05547	0.0404262	0.0692012
CD63	2.05463	6.86287e-07	3.27203e-06
SERF2	2.05437	3.02514e-11	3.85537e-10
CSNK2B	2.05298	2.42593e-15	9.52129e-14
FKBP2	2.05188	6.61793e-12	9.78921e-11
RPP21	2.05039	5.59836e-10	5.22822e-09
MTCH2	2.05015	2.45869e-16	1.26427e-14
TMBIM6	2.04951	4.92827e-12	7.61115e-11
ZNF57	2.04714	1.73925e-15	7.21077e-14
MCTS1	2.04558	1.05217e-06	4.82276e-06
RBM34	2.04519	2.47146e-15	9.623e-14
NDUFB7	2.04502	5.79056e-13	1.13786e-11
GAPDHS	2.04468	0.0288669	0.0515548
AKR1A1	2.03894	4.69571e-05	0.000154646
PRDX5	2.03657	3.84273e-10	3.75796e-09
RPP40	2.03394	6.97391e-10	6.37528e-09
NSMCE1	2.03392	2.01229e-11	2.64672e-10
DHRS7B	2.03328	2.03512e-13	4.57692e-12
DCTPP1	2.0332	3.46535e-12	5.51384e-11
PNMA2	2.033	0.00140923	0.00344307
GNGT1	2.03007	1.29206e-13	3.07214e-12
CITED1	2.02915	0.00744484	0.0153669
TMED1	2.02745	4.17727e-13	8.63497e-12
FDFT1	2.02661	4.6036e-08	2.79867e-07
BSCL2	2.0265	1.91027e-07	1.02052e-06
NDUFB3	2.02618	3.38453e-16	1.68289e-14
ABT1	2.02606	5.24531e-12	8.025e-11
KRT12	2.02279	9.26331e-14	2.25724e-12
ESD	2.02152	5.55365e-12	8.40932e-11
ZNF669	2.01882	6.17227e-12	9.21131e-11
TBC1D4	2.01721	0.00171916	0.00411425
IDH3G	2.01672	1.22708e-11	1.7054e-10
PSMA1	2.01617	2.31028e-16	1.20151e-14
LCP1	2.01299	0.00848618	0.017268
LAMTOR4	2.01254	1.00705e-12	1.85737e-11
TAF9	2.01056	5.32101e-10	5.00093e-09
NDUFAF4	2.00934	2.52862e-09	2.02703e-08
BCAN	2.00873	0.0182538	0.0343028
JKAMP	2.00861	1.78811e-13	4.06132e-12
LGALS3BP	2.00815	2.20602e-06	9.48531e-06
TEX30	2.00715	3.01097e-10	3.01683e-09
S100A11	2.0068	1.25848e-09	1.07738e-08
MMAB	2.00276	6.45841e-10	5.94464e-09
DOLK	2.00195	3.29334e-13	7.00454e-12
A2M	2.00148	0.122897	0.18137
ACKR4	2.00144	0.000626234	0.00165119
TMEM126A	2.00032	8.38028e-11	9.5244e-10
CHMP2A	1.99747	7.25554e-14	1.83168e-12
MITF	1.9969	0.0174311	0.0329546
FCGRT	1.99684	0.00338385	0.00759663
RNF5	1.99619	8.65417e-10	7.70085e-09
TMEM186	1.99394	3.76761e-13	7.88787e-12
BLOC1S5	1.99259	1.05574e-14	3.37059e-13
MRPL24	1.99248	5.05079e-13	1.01139e-11
ATP5C1	1.99169	3.6543e-14	9.98273e-13
STOM	1.99091	0.00400229	0.00883541
POLR1C	1.98677	5.90329e-13	1.15692e-11
PRDX1	1.98618	0.0315654	0.055792
PCDHGC3	1.98503	0.00829206	0.0169268
C1GALT1C1L	1.98484	4.96017e-05	0.000162447
MRPL48	1.98477	9.4139e-12	1.33868e-10
POLR2G	1.98391	1.29127e-11	1.776e-10
EFCAB2	1.9835	7.75443e-13	1.47836e-11
HIKESHI	1.98224	4.43299e-10	4.26332e-09
MRPS12	1.98164	7.62648e-12	1.11135e-10
SSSCA1	1.98159	1.7047e-11	2.27263e-10
PDHA1	1.98032	3.96021e-11	4.87318e-10
NDUFB4	1.98031	1.30014e-15	5.54652e-14
ECH1	1.97983	4.00267e-10	3.88854e-09
BECN1	1.97983	1.61436e-16	8.73534e-15
C3orf14	1.97766	7.96872e-07	3.7425e-06
MRPS36	1.97717	4.549e-12	7.0774e-11
ZNF564	1.97362	2.87827e-15	1.09463e-13
PRR4	1.97315	0.000616114	0.00162683
C10orf90	1.97272	0.00199755	0.00471667
TMEM258	1.96755	3.4632e-10	3.4232e-09
MRPL21	1.96648	1.48743e-07	8.13224e-07
ALDOC	1.96632	0.0586699	0.0959235
NDUFV1	1.966	2.97824e-11	3.80501e-10
ZNF350	1.96559	1.18029e-09	1.01741e-08
BAAT	1.96543	0.000286727	0.000807974
LYRM9	1.96402	2.66068e-06	1.12593e-05
SNRPC	1.96386	9.54597e-13	1.77172e-11
TRO	1.96072	0.000901728	0.0023037
TIMM21	1.96059	1.61569e-13	3.71173e-12
CUTA	1.96046	1.50413e-10	1.60535e-09
CD58	1.95941	2.76761e-10	2.80535e-09
CCL5	1.95872	0.0142237	0.0274478
LINC00116	1.95686	2.83587e-05	9.77938e-05
MRPS18B	1.95469	1.42404e-12	2.53129e-11
EBP	1.95448	4.18101e-05	0.000139222
MX1	1.95444	0.017088	0.0324099
TCN1	1.9527	0.0326409	0.0574446
LINC00998	1.95218	1.35312e-08	9.31487e-08
HSD17B12	1.95055	7.45007e-10	6.7477e-09
TMEM98	1.9499	0.00385839	0.00854851
UBC	1.94824	1.117e-10	1.23795e-09
NDUFA11	1.94675	2.17573e-14	6.26473e-13
ECE2	1.94672	1.26069e-09	1.07815e-08
GSTO1	1.94484	1.22731e-06	5.53418e-06
ITLN2	1.94473	6.04009e-08	3.59184e-07
COMMD1	1.94472	5.93623e-17	3.58071e-15
NME6	1.93973	2.39229e-08	1.55451e-07
DCAF13	1.93967	4.14755e-11	5.07851e-10
PSMG2	1.93963	1.59887e-12	2.79148e-11
FES	1.93948	0.00383667	0.00850423
EEF1E1	1.93772	2.10533e-12	3.53725e-11
PHGDH	1.93504	0.022252	0.0409331
NDUFA6	1.93417	4.67597e-11	5.65032e-10
RNF181	1.93173	4.97432e-15	1.739e-13
FCER1G	1.93157	0.00903183	0.0182522
RBX1	1.93077	3.88534e-12	6.1291e-11
FABP5	1.92751	0.0226845	0.0416246
GAL3ST4	1.92601	0.00271073	0.00621344
ZNF85	1.92469	1.23771e-05	4.59089e-05
FXYD3	1.9223	0.109531	0.164431
WASHC3	1.92196	1.40386e-11	1.91315e-10
MRPL54	1.92105	7.74942e-11	8.88979e-10
MED18	1.92102	1.27536e-14	3.96843e-13
HMGCR	1.92034	3.3194e-08	2.0807e-07
MDP1	1.91912	2.11667e-07	1.12253e-06
TAPBPL	1.91683	6.26762e-06	2.45599e-05
OTUB1	1.91595	8.92128e-14	2.19046e-12
FBXO36	1.91427	1.3151e-08	9.08287e-08
MRPL47	1.91405	1.08769e-14	3.43533e-13
MYL12B	1.91344	5.16848e-14	1.36082e-12
CYP51A1	1.91194	1.61194e-05	5.83197e-05
TAPBP	1.91187	1.20224e-07	6.72844e-07
GAPDH	1.91145	4.29354e-10	4.14105e-09
DNAJC19	1.91145	7.8367e-15	2.59776e-13
LPAR1	1.91085	0.0215156	0.0397472
TIMM8B	1.91024	9.52097e-08	5.42717e-07
MRPL36	1.90937	2.02744e-10	2.12082e-09
CISD1	1.90924	8.5211e-10	7.61004e-09
C11orf49	1.90866	3.88484e-11	4.79272e-10
NDUFS2	1.9082	3.44805e-11	4.31534e-10
INTS9	1.90659	1.71728e-08	1.14991e-07
SPCS1	1.90524	2.62022e-15	1.01485e-13
GAS2	1.90381	0.000253809	0.000721707
TAX1BP3	1.90091	8.01097e-06	3.06964e-05
COA6	1.90025	1.81175e-10	1.90739e-09
PRELP	1.90023	0.00318263	0.00717994
MRPL42	1.89878	3.50756e-13	7.40665e-12
SLC24A5	1.89813	0.0682095	0.109609
CNIH4	1.89641	2.7308e-15	1.04666e-13
PLA2G4A	1.89337	0.000580945	0.00154166
PSMB8	1.89253	1.27675e-06	5.74128e-06
ZNF253	1.89199	1.93336e-05	6.89154e-05
TRAPPC4	1.89164	1.35628e-10	1.47102e-09
CHCHD5	1.89158	7.05267e-15	2.36989e-13
TMEM69	1.89093	7.20879e-15	2.41134e-13
MCAM	1.8884	0.0376042	0.0649828
PPP2R1A	1.88633	6.16372e-16	2.79993e-14
PMAIP1	1.88508	8.11247e-05	0.000254312
TMSB15A	1.88491	0.00692064	0.0144009
TMEM254	1.88043	1.5273e-12	2.67605e-11
ILVBL	1.88003	4.47914e-09	3.39989e-08
AK6	1.87344	8.6035e-14	2.12104e-12
MDH2	1.87273	6.29586e-09	4.62618e-08
LDHB	1.87141	7.65178e-11	8.79835e-10
BOLA2	1.87078	1.23533e-07	6.88699e-07
REG3G	1.86919	0.000320966	0.000896051
VPS28	1.86859	1.80846e-14	5.33406e-13
EIF3K	1.86848	2.34334e-11	3.05756e-10
TXN2	1.86615	1.42924e-10	1.53526e-09
MTFR1L	1.86614	7.51184e-16	3.34016e-14
MYL12A	1.86482	1.22434e-10	1.34376e-09
DGUOK	1.86397	3.96554e-17	2.54868e-15
ECI2	1.86319	4.62907e-05	0.000152554
LCMT1	1.86171	3.47339e-16	1.70405e-14
OST4	1.86134	2.46209e-10	2.53584e-09
TRAPPC2L	1.86073	3.90663e-13	8.12116e-12
EXOSC8	1.86065	7.98403e-11	9.13046e-10
TREX1	1.8598	2.79696e-08	1.78361e-07
PSMB2	1.85806	6.63339e-12	9.79829e-11
THBS2	1.85773	0.274977	0.356857
ACP5	1.85564	0.031766	0.056106
MRPS7	1.85535	5.00833e-11	6.02719e-10
OSTC	1.85533	1.13656e-09	9.82661e-09
FLAD1	1.85139	1.13043e-11	1.58908e-10
SPAG7	1.85135	6.26904e-11	7.35787e-10
MINOS1	1.85095	1.61906e-13	3.71173e-12
PSMA2	1.84791	5.83723e-11	6.90059e-10
ZNF430	1.84655	1.43371e-13	3.34941e-12
ZNF649	1.84631	5.45673e-06	2.16358e-05
DPAGT1	1.8458	4.89596e-09	3.68022e-08
TCTN3	1.84488	3.74104e-11	4.63473e-10
ZNF506	1.84413	5.88408e-06	2.31742e-05
SPTSSA	1.84403	6.53131e-10	6.00799e-09
HMBS	1.84359	4.14383e-10	4.00978e-09
NDUFA8	1.84332	4.88006e-09	3.67202e-08
ETFRF1	1.8432	7.70927e-11	8.85753e-10
UBE2V2	1.84214	3.88592e-15	1.40523e-13
FMOD	1.84072	0.133502	0.194523
SLC25A45	1.83956	1.84194e-07	9.87964e-07
DBI	1.83905	9.99976e-08	5.68249e-07
S100B	1.83843	0.144261	0.20761
USMG5	1.83802	2.17278e-13	4.85266e-12
NDUFA5	1.83665	3.00063e-12	4.90218e-11
AKAP6	1.83658	0.00277983	0.00635996
C16orf91	1.83617	1.31636e-09	1.12365e-08
PSMB5	1.83069	3.16953e-12	5.10944e-11
FAM104B	1.83054	1.33369e-12	2.39382e-11
GOT1	1.82926	2.42096e-07	1.26848e-06
HIST1H1A	1.82912	3.86663e-12	6.10612e-11
ZNF675	1.82903	2.16816e-07	1.14705e-06
MRGPRX3	1.8283	0.0276522	0.0496081
NHP2	1.82776	1.64685e-10	1.74628e-09
HIST1H2AH	1.82776	2.62973e-08	1.68867e-07
GHITM	1.82695	3.15387e-11	3.98102e-10
MMP3	1.82573	0.0222848	0.0409882
TNFAIP6	1.82521	0.0141878	0.0273857
ARL2	1.82373	5.86332e-10	5.46526e-09
SCNM1	1.82324	3.03219e-11	3.85537e-10
KBTBD4	1.82236	7.36269e-15	2.45723e-13
TPP1	1.8222	6.97239e-06	2.70407e-05
NFIA	1.8221	6.0022e-06	2.36078e-05
LACTB2	1.82021	3.8453e-08	2.37595e-07
SWI5	1.81869	1.73965e-11	2.31712e-10
ARV1	1.81825	3.04684e-11	3.86581e-10
SERPINB2	1.8178	0.109442	0.164331
TCN2	1.81768	0.0197405	0.0367447
CSRP1	1.81714	0.000115353	0.00035085
UBD	1.8164	0.00063968	0.00168242
IFIT2	1.81629	0.00471063	0.0102183
SNRPD2	1.81607	5.99222e-12	8.98101e-11
ATP6V1F	1.81434	5.20372e-08	3.13245e-07
PRDX2	1.81304	0.0916873	0.141245
PRR13	1.81239	3.04692e-12	4.94427e-11
MAGED1	1.81125	7.17524e-05	0.000226766
MORN2	1.81115	3.45083e-12	5.49973e-11
SNRPE	1.81104	2.89836e-12	4.75564e-11
ZNF43	1.8107	0.000296726	0.000833757
TSNAX	1.80874	1.10512e-09	9.60165e-09
NCSTN	1.80873	1.25105e-06	5.63603e-06
PIGP	1.80869	9.01441e-13	1.68582e-11
SAP18	1.80832	2.7512e-15	1.05174e-13
CKS2	1.80386	3.20078e-08	2.01493e-07
ZNF91	1.80323	5.08267e-06	2.02564e-05
FHIT	1.80222	2.54426e-09	2.03845e-08
MRPS28	1.80197	3.0111e-10	3.01683e-09
PEF1	1.80154	1.56066e-13	3.60592e-12
SRP9	1.80142	2.24186e-12	3.74951e-11
TMEM179B	1.80003	1.43469e-08	9.80303e-08
HSD3B7	1.7998	0.00127605	0.00315063
CDH19	1.79807	0.0264472	0.0476964
APRT	1.79806	5.10662e-13	1.0198e-11
C1S	1.79715	0.0596286	0.0972964
FCGR2A	1.79532	0.0049954	0.0107662
POLR3C	1.79438	3.20512e-11	4.03879e-10
WRB	1.79359	2.44555e-11	3.17442e-10
ARID5B	1.79049	5.66696e-07	2.75177e-06
VPS25	1.78987	3.80595e-13	7.95682e-12
GLMP	1.78965	0.000665582	0.00174493
ERCC1	1.78864	5.45637e-08	3.27115e-07
NEFH	1.78851	0.0573964	0.0941762
BEX3	1.78765	1.11191e-08	7.75962e-08
TXNDC17	1.78733	5.6089e-10	5.23474e-09
DCTN6	1.78552	2.86037e-11	3.67355e-10
EMP3	1.78498	3.84267e-05	0.000128919
PLXNC1	1.7838	0.0658538	0.106322
BLVRB	1.78309	1.85201e-06	8.07643e-06
ALG6	1.78059	5.38763e-10	5.05709e-09
MRPS17	1.78047	1.1724e-12	2.13821e-11
ZNF256	1.77853	0.000139058	0.000416579
STYXL1	1.77749	3.66437e-07	1.85428e-06
MAGOHB	1.7773	1.47861e-10	1.57926e-09
SRA1	1.77449	7.47397e-11	8.61317e-10
RP11-176H8.1	1.7741	7.0462e-07	3.34859e-06
PHB	1.7736	1.18069e-09	1.01741e-08
RAB9A	1.77341	2.70567e-08	1.73441e-07
UBL7	1.77296	5.51994e-10	5.16153e-09
LYPLAL1	1.77187	5.39402e-11	6.4544e-10
ATP5A1	1.77155	8.5316e-11	9.68142e-10
OAS1	1.77068	0.00190861	0.00452277
SELENOW	1.76944	1.18561e-07	6.64504e-07
ATP5L	1.76793	7.36119e-09	5.32917e-08
KIT	1.76709	0.0334542	0.058701
SLC35A1	1.76617	6.81535e-09	4.97561e-08
PINX1	1.76566	2.86197e-05	9.86013e-05
COX5B	1.76504	1.16081e-08	8.07413e-08
REEP5	1.76373	2.40343e-13	5.29546e-12
COL19A1	1.76276	0.0395989	0.0679432
RSU1	1.76131	1.45651e-08	9.93827e-08
SEC11C	1.76118	2.94485e-07	1.51865e-06
COQ10B	1.76063	6.39716e-13	1.24541e-11
DDB2	1.76057	0.000226962	0.000652426
GSTM3	1.75956	0.00795373	0.0163131
CLP1	1.75925	1.03555e-09	9.05059e-09
CDK20	1.75796	3.19898e-05	0.00010919
HADHB	1.75737	5.01707e-09	3.754e-08
DAD1	1.75449	1.54539e-15	6.48008e-14
ZNF565	1.75421	4.66228e-17	2.95774e-15
FUNDC2	1.75298	2.5027e-10	2.57225e-09
SSR4	1.75129	2.83176e-08	1.80268e-07
PIGB	1.75124	1.7745e-10	1.87085e-09
LDHA	1.74868	7.41236e-08	4.31889e-07
LYPLA2	1.74822	8.63101e-12	1.23812e-10
TMEM176B	1.74793	1.57366e-07	8.55286e-07
POMP	1.74763	3.05541e-11	3.87335e-10
USP11	1.7469	9.09199e-07	4.22266e-06
VPS29	1.74635	1.8611e-15	7.65129e-14
ANXA4	1.74626	4.90192e-09	3.68282e-08
DYRK4	1.7449	2.58627e-10	2.64338e-09
BNIP3L	1.74481	1.0544e-06	4.83145e-06
KLHL14	1.74437	6.11628e-05	0.000196335
HOXA10	1.74211	0.002278	0.00531426
WDR74	1.74146	8.86352e-10	7.87209e-09
ZNF93	1.7413	7.49979e-05	0.000236313
DECR1	1.74128	3.50892e-10	3.46373e-09
ZNF627	1.74106	4.70336e-10	4.49215e-09
ROMO1	1.74022	8.868e-10	7.87209e-09
DDIT3	1.7397	0.000294269	0.000827327
GSTZ1	1.73927	5.6422e-07	2.74065e-06
MT1X	1.73826	0.000163664	0.000484475
ZNF426	1.7382	9.63874e-09	6.80724e-08
NIT2	1.73782	1.26306e-12	2.27816e-11
COX8A	1.73763	3.36998e-10	3.34453e-09
SCFD2	1.73735	2.59481e-07	1.35283e-06
FIBP	1.73599	1.12493e-09	9.75072e-09
HMGCS1	1.73435	0.00104711	0.00263667
MRPL44	1.73087	4.99093e-08	3.01051e-07
RPL36	1.72995	2.84002e-10	2.86887e-09
COPE	1.72977	5.43033e-14	1.42213e-12
PYROXD2	1.72899	0.0181255	0.0340878
PEX11B	1.72816	5.8692e-12	8.82359e-11
C19orf48	1.72766	3.91989e-08	2.41797e-07
GTF3C6	1.72758	6.7562e-09	4.93732e-08
CIAPIN1	1.72694	3.21481e-12	5.1711e-11
ARHGDIB	1.72692	0.0221542	0.0407711
CD59	1.72683	9.40539e-05	0.000290938
DHRS3	1.7264	0.126505	0.185726
HLA-E	1.7254	7.86143e-06	3.01943e-05
ZNF670	1.72494	3.33473e-09	2.60651e-08
RPF2	1.72479	7.2789e-09	5.27738e-08
CNDP2	1.72475	4.71553e-07	2.32896e-06
RFTN2	1.72472	0.000214049	0.000619057
FANCL	1.72415	5.13099e-10	4.84089e-09
C4orf3	1.72257	0.00110098	0.00276098
SLC22A18AS	1.71884	0.0178751	0.0337034
HLA-G	1.71837	5.50947e-05	0.000178452
PPP1R11	1.71814	2.0619e-12	3.48416e-11
TRUB2	1.71799	1.87381e-08	1.24565e-07
TMEM208	1.71532	2.49001e-10	2.56188e-09
VRK3	1.71264	4.37317e-15	1.54351e-13
RFT1	1.71252	1.38565e-10	1.49626e-09
ZNF460	1.711	1.59605e-08	1.07805e-07
HDDC2	1.71089	3.53544e-07	1.79491e-06
LSAMP	1.70739	0.00644692	0.0135184
MAGEC1	1.70709	0.0863662	0.134327
C6orf58	1.70479	4.72057e-06	1.8926e-05
ZNF260	1.70471	1.55441e-09	1.3118e-08
DDOST	1.70255	1.53741e-12	2.69055e-11
CTSC	1.70253	1.33337e-05	4.91009e-05
TMEM222	1.70148	7.49608e-14	1.87951e-12
UQCRC2	1.70135	6.47689e-11	7.57163e-10
DCPS	1.69899	1.0547e-07	5.95186e-07
ATP6V1G1	1.69664	6.68429e-08	3.93046e-07
GABARAP	1.69656	8.45955e-10	7.55967e-09
TRAPPC2B	1.69624	2.57987e-09	2.06362e-08
ELOB	1.69571	5.33497e-09	3.96967e-08
CHID1	1.69458	2.61905e-10	2.66947e-09
BEX2	1.6933	0.0121609	0.0238772
MRPS10	1.69175	1.24313e-12	2.24771e-11
GEMIN6	1.69165	4.31838e-11	5.24406e-10
ZNF677	1.69123	0.000175648	0.000517142
NDUFB6	1.69052	5.74168e-12	8.66729e-11
GTF2A2	1.68939	4.83078e-13	9.75301e-12
TIMMDC1	1.68753	4.77816e-10	4.54296e-09
C12orf10	1.68729	6.05306e-10	5.62075e-09
RNF13	1.68698	2.36476e-08	1.5373e-07
ARMC9	1.6866	0.000182605	0.000535375
KBTBD7	1.68222	1.58397e-07	8.60256e-07
BORCS7	1.68159	3.55855e-09	2.76822e-08
SMIM8	1.6812	1.10868e-11	1.56149e-10
SARS2	1.67899	4.25823e-10	4.11507e-09
ZNF573	1.6787	9.23656e-10	8.1501e-09
CABYR	1.67867	0.000675158	0.00176752
SUCLG1	1.67755	5.49851e-10	5.14476e-09
TRMT112	1.67702	7.98275e-09	5.73963e-08
ZNF267	1.67689	7.86234e-11	9.00864e-10
TRAPPC2	1.67641	1.01778e-08	7.14683e-08
ELP5	1.67607	1.57969e-11	2.12585e-10
CDC123	1.67593	1.76431e-09	1.46488e-08
USE1	1.67518	5.17594e-07	2.53256e-06
SGCE	1.67499	0.00118331	0.00294836
CYB5A	1.67402	3.77728e-05	0.000126985
BEX4	1.67357	0.0359902	0.0625389
ALG5	1.6734	6.06102e-10	5.62459e-09
SNX2	1.67319	6.8562e-12	1.00809e-10
CHURC1	1.67255	8.6718e-12	1.24276e-10
CNBP	1.67111	6.40444e-12	9.52303e-11
ARF1	1.671	8.48947e-12	1.22258e-10
LYRM7	1.67067	7.15814e-11	8.26302e-10
CLIC1	1.67002	3.00031e-09	2.36269e-08
WDR63	1.66991	0.00426998	0.0093562
TBC1D7	1.6695	0.00926072	0.018664
PEMT	1.66816	1.56406e-08	1.05985e-07
APOBEC3C	1.66804	4.75072e-05	0.000156248
TBRG4	1.66573	2.06886e-08	1.36545e-07
HUS1	1.66517	1.28808e-10	1.40325e-09
TFB2M	1.66443	8.53053e-09	6.08591e-08
TXNL1	1.66431	3.32986e-13	7.0618e-12
DNASE2	1.66399	8.12064e-09	5.82738e-08
TMEM140	1.66377	1.68787e-06	7.41332e-06
MRPS9	1.66345	3.13526e-10	3.13058e-09
SF3B6	1.66317	6.29082e-10	5.80855e-09
DDX41	1.66225	2.08416e-09	1.70131e-08
DDX56	1.66184	9.9709e-09	7.01155e-08
WDR54	1.66161	7.16534e-06	2.7716e-05
SYPL1	1.66159	1.11023e-09	9.64036e-09
UBAC2	1.66146	4.2362e-13	8.73227e-12
TSG101	1.66074	8.68889e-15	2.84818e-13
ZMAT5	1.66005	1.52714e-09	1.29027e-08
COPS7A	1.65973	1.92758e-09	1.58324e-08
ZNF613	1.65938	5.36808e-08	3.22085e-07
FMO4	1.65925	6.78406e-06	2.64008e-05
SNRPD1	1.65905	1.88928e-11	2.49833e-10
CLIC2	1.65844	0.00151367	0.00367082
TMEM53	1.65736	1.50311e-08	1.02278e-07
FAM96A	1.65658	1.76842e-08	1.18253e-07
TIMM23	1.65466	8.55387e-10	7.63005e-09
NUTF2	1.65448	5.04321e-12	7.76422e-11
NDUFA2	1.65415	1.7348e-09	1.44498e-08
MAPRE2	1.6532	3.82701e-07	1.92963e-06
PLAT	1.65104	0.0172416	0.0326452
SEMA3E	1.65062	0.0218522	0.0402991
ATP5H	1.64939	2.81879e-10	2.8533e-09
HADHA	1.6486	5.95111e-09	4.386e-08
HBP1	1.64839	4.44878e-07	2.20983e-06
RNF14	1.64835	1.67152e-10	1.77116e-09
SFTPC	1.64813	1.03031e-05	3.87135e-05
PBDC1	1.64757	0.00113906	0.00285016
DPM2	1.64634	2.76625e-08	1.76659e-07
NAA38	1.64595	7.73678e-09	5.58186e-08
ZNF695	1.64586	7.89014e-05	0.000247764
ISG15	1.64468	0.0253888	0.0460017
COL9A1	1.6444	0.00157971	0.00381401
HIST1H2BD	1.64407	0.00687029	0.0143108
TXNDC9	1.64282	4.48556e-15	1.57562e-13
EMC4	1.64279	7.88888e-12	1.14393e-10
MOSPD1	1.64202	1.86374e-07	9.98094e-07
SFXN4	1.64129	2.11222e-06	9.11928e-06
STAM	1.64015	3.75724e-07	1.89545e-06
HSD17B10	1.63822	1.58576e-09	1.33443e-08
HPS1	1.63743	5.28832e-07	2.58411e-06
MED4	1.63718	3.41452e-13	7.22054e-12
COMT	1.63706	6.34027e-06	2.48247e-05
NME1	1.63593	5.00285e-09	3.74527e-08
ACTG1	1.63525	6.5876e-05	0.000209771
PLTP	1.63388	0.0673067	0.108312
EAPP	1.63323	1.69109e-08	1.13651e-07
ZDHHC9	1.63306	3.96816e-08	2.44263e-07
LINC00493	1.63264	1.18138e-09	1.01741e-08
CCT3	1.63254	4.66231e-08	2.83202e-07
WDR45	1.63243	5.44638e-06	2.16064e-05
TMEM120A	1.63206	3.50761e-06	1.44608e-05
AMN1	1.63124	5.03838e-07	2.47101e-06
KYAT3	1.63044	3.83814e-09	2.96379e-08
GSTM4	1.62982	1.5175e-05	5.52617e-05
SEC13	1.62896	1.7383e-09	1.44626e-08
COQ5	1.62818	3.65425e-09	2.83368e-08
MRPL50	1.62793	1.13702e-09	9.82661e-09
TMEM99	1.62767	4.50387e-06	1.81462e-05
BGLAP	1.62738	5.92172e-06	2.33162e-05
PRDX6	1.62696	1.01901e-09	8.92726e-09
ZNF730	1.62584	2.48164e-09	1.99371e-08
SEC22A	1.62494	1.10088e-14	3.46955e-13
TMEM18	1.62417	2.24442e-10	2.33617e-09
TEX264	1.6218	9.15055e-11	1.02965e-09
PIR	1.62088	0.00330391	0.00742751
DPF2	1.61913	9.43092e-11	1.05958e-09
MRPS6	1.61735	0.00199781	0.00471667
EIF6	1.61712	1.28011e-08	8.8662e-08
PMPCA	1.61647	2.02888e-08	1.34327e-07
MRPS16	1.61628	1.20119e-10	1.32033e-09
BRE	1.61606	2.05959e-12	3.48416e-11
CCDC159	1.61567	9.8009e-07	4.52335e-06
TREM1	1.61552	7.05655e-05	0.000223255
C19orf54	1.61491	3.93429e-09	3.02533e-08
ANAPC13	1.61412	9.67157e-09	6.82061e-08
GAGE12H	1.61335	2.01259e-07	1.07129e-06
PEX16	1.61212	1.76467e-09	1.46488e-08
IQGAP2	1.61163	0.000290757	0.000818232
ZNF544	1.61113	0.000107652	0.000329676
COMMD2	1.61045	1.23275e-11	1.70583e-10
RBM8A	1.61031	4.27334e-10	4.12697e-09
RIPPLY2	1.61019	0.000371784	0.00102643
SNU13	1.61016	3.52789e-09	2.74728e-08
BRMS1	1.60895	4.39178e-09	3.3395e-08
MED27	1.60879	4.9221e-09	3.69609e-08
COMMD8	1.60866	5.85482e-10	5.46079e-09
TIMM17A	1.60775	3.00673e-10	3.01657e-09
B9D1	1.60753	2.84628e-08	1.81114e-07
MED11	1.60666	3.4732e-08	2.16487e-07
MRPL17	1.60603	1.74103e-10	1.83951e-09
GLO1	1.6055	1.59994e-08	1.08018e-07
UCHL3	1.6046	7.05847e-08	4.13232e-07
SLC38A6	1.60417	5.65735e-09	4.18417e-08
TATDN1	1.60413	1.21077e-05	4.50118e-05
PDCD4	1.60276	0.000220131	0.000634524
PPME1	1.60153	3.4359e-08	2.14368e-07
MRPL2	1.60141	9.60902e-09	6.78951e-08
ETFB	1.60071	0.0011439	0.0028618
LIPA	1.59917	0.00240762	0.00558478
COA4	1.59821	9.11442e-08	5.22172e-07
HNRNPH2	1.5982	7.47903e-11	8.61317e-10
CCS	1.59787	1.24922e-09	1.07144e-08
SNX10	1.59742	0.027468	0.0493258
SLC25A5	1.59705	4.77672e-07	2.35681e-06
ZNF480	1.59667	6.32802e-10	5.83192e-09
SLC35A4	1.59647	4.50819e-10	4.32821e-09
CASP1	1.59612	0.0377757	0.0652179
ZNF34	1.59569	1.01031e-10	1.12821e-09
NDUFB5	1.5955	3.001e-12	4.90218e-11
KRT27	1.59477	0.000552823	0.00147266
COPG1	1.59409	6.41342e-09	4.70787e-08
NMNAT1	1.59409	5.97358e-06	2.35078e-05
PET100	1.5936	1.49859e-08	1.02018e-07
MEOX2	1.59342	0.0103567	0.020632
COMMD9	1.59267	1.244e-10	1.36128e-09
SSR1	1.59245	1.55429e-08	1.0542e-07
FAIM	1.59147	0.000590181	0.00156341
NOP10	1.59143	3.77358e-10	3.69525e-09
CSTB	1.5914	0.000549704	0.00146515
PUDP	1.59057	1.96259e-05	6.99067e-05
LDB3	1.59053	0.000730362	0.00190121
TMEM11	1.59029	5.11904e-12	7.85631e-11
DCP1B	1.59021	6.20735e-08	3.67645e-07
ANAPC11	1.58916	1.4059e-08	9.63764e-08
GBA	1.58861	0.000323865	0.000903972
PDZD11	1.58823	1.02868e-09	9.00657e-09
ITGAX	1.58745	0.00130404	0.00321328
LYPD8	1.58712	5.27125e-05	0.000171604
SPARC	1.5855	0.0652512	0.105483
TM2D1	1.58486	9.62299e-14	2.341e-12
MRTO4	1.58388	4.84697e-10	4.59947e-09
MRPL49	1.58367	5.35258e-08	3.21286e-07
TMEM50A	1.58357	7.63678e-15	2.5372e-13
HMOX2	1.58311	1.07346e-10	1.1924e-09
ZNF790	1.58285	2.41025e-06	1.02972e-05
ARL15	1.58242	1.10454e-06	5.03926e-06
ERAL1	1.57948	3.16597e-13	6.79253e-12
NDUFS5	1.57894	2.61866e-10	2.66947e-09
ARAF	1.57793	2.58248e-10	2.64134e-09
ATP6V0E1	1.57756	2.67071e-07	1.38847e-06
VPS52	1.57634	5.80782e-11	6.88206e-10
PPIL1	1.57513	1.66308e-09	1.39075e-08
RABIF	1.57449	2.54758e-08	1.64309e-07
PNPLA4	1.5744	0.00206764	0.00486827
MSN	1.57416	0.000349499	0.000968906
PSME1	1.57403	2.20666e-06	9.48531e-06
HS6ST2	1.57226	0.027849	0.0499308
C2orf76	1.57169	1.15339e-10	1.27158e-09
PHACTR1	1.57143	0.00623876	0.0131362
TSACC	1.57112	7.24743e-13	1.39617e-11
AKIP1	1.57086	1.45909e-12	2.58112e-11
NUDT17	1.57081	6.44466e-06	2.51732e-05
ZNF701	1.57038	1.53449e-05	5.57921e-05
ABCA6	1.56971	0.00034847	0.000966418
COPZ1	1.56946	2.62643e-13	5.71831e-12
PLP1	1.56886	0.105887	0.159676
BST2	1.5685	0.256437	0.33704
AP3M2	1.5681	7.8891e-06	3.02848e-05
PNO1	1.56777	7.4752e-13	1.43255e-11
C14orf119	1.56773	1.4233e-13	3.3357e-12
YIPF3	1.56705	1.57612e-08	1.06557e-07
ANGPTL2	1.56698	0.172216	0.241076
HAX1	1.56616	1.60173e-09	1.3425e-08
CCL20	1.56538	0.0362999	0.0630397
NUDT5	1.5651	5.43808e-08	3.26152e-07
PPOX	1.56037	3.05901e-09	2.40505e-08
EMC2	1.55955	4.34105e-09	3.30531e-08
NDUFV3	1.55841	8.30241e-10	7.4373e-09
WBSCR22	1.55676	2.90865e-06	1.2193e-05
RSL1D1	1.55588	1.6161e-09	1.353e-08
MAGEH1	1.55542	0.00860496	0.0174807
PSMG1	1.55498	4.95862e-09	3.71902e-08
ABHD16A	1.55456	2.7772e-08	1.77254e-07
SELENOT	1.55444	4.53363e-09	3.43771e-08
TMEM59	1.55334	2.57518e-10	2.63571e-09
TARS2	1.55331	2.17093e-09	1.76334e-08
PAAF1	1.5528	8.8614e-11	1.00094e-09
MTX1	1.55232	8.06801e-11	9.20504e-10
GOLGA7	1.55231	1.23358e-10	1.35189e-09
ANAPC10	1.55199	7.42872e-13	1.4255e-11
POLR2E	1.55006	6.11623e-10	5.66512e-09
MPI	1.54946	1.54392e-07	8.41297e-07
ZNF879	1.5476	1.83077e-08	1.22035e-07
PSMA6	1.54721	4.27193e-11	5.20051e-10
SSBP1	1.54708	2.43576e-11	3.16691e-10
GNG12	1.54685	6.25915e-08	3.70266e-07
SNAPIN	1.54651	2.07214e-10	2.16479e-09
RIDA	1.54631	9.34211e-07	4.33198e-06
SH3BGRL3	1.54592	0.000127712	0.000384627
MITD1	1.54425	2.00984e-10	2.1054e-09
PAFAH1B3	1.5437	5.31815e-09	3.95916e-08
TATDN3	1.54322	1.99387e-07	1.0621e-06
BBS1	1.54235	1.1184e-06	5.08988e-06
FAM32A	1.54212	1.79826e-10	1.89455e-09
UPK1A	1.54205	6.00649e-08	3.5733e-07
FFAR2	1.54165	5.02772e-07	2.46742e-06
MRPS21	1.5408	7.66304e-09	5.53408e-08
DPH2	1.53892	2.42701e-08	1.57286e-07
ELP3	1.53775	1.35108e-10	1.46863e-09
RABL3	1.53668	1.64184e-10	1.74347e-09
RAB18	1.53586	5.9243e-10	5.51358e-09
UROD	1.53506	6.21165e-09	4.56887e-08
ZNF106	1.53468	0.00073188	0.00190483
ZNF16	1.53466	1.77407e-09	1.47036e-08
TK1	1.53397	4.77138e-05	0.000156788
ZNF30	1.53363	2.97695e-09	2.34806e-08
CYB5R1	1.53158	2.47234e-06	1.05381e-05
ISOC2	1.5315	5.79316e-07	2.8075e-06
WDR25	1.53118	6.37365e-07	3.0596e-06
ZNF44	1.53086	1.46873e-05	5.36794e-05
TMCO1	1.53074	0.000277057	0.000782524
CRADD	1.53048	5.71295e-07	2.77137e-06
GRPEL1	1.5302	9.69211e-09	6.83183e-08
COMMD5	1.53007	5.4776e-10	5.12846e-09
BAK1	1.52974	3.9755e-09	3.05224e-08
IRF4	1.52939	0.0865372	0.134536
ZNF136	1.52925	3.33091e-07	1.6987e-06
IDH3A	1.52862	4.7044e-06	1.88766e-05
PPEF1	1.52853	4.88694e-07	2.40636e-06
APEX2	1.52752	2.6263e-09	2.09166e-08
DDX49	1.527	6.6008e-09	4.83336e-08
SLC35B3	1.52694	2.81218e-08	1.79176e-07
NQO1	1.52608	0.00022376	0.000644103
UNC50	1.52546	4.23252e-15	1.5016e-13
PSMB7	1.52489	2.16254e-10	2.25253e-09
C6orf52	1.52273	1.79028e-05	6.41884e-05
PCLAF	1.52212	3.35657e-05	0.000114066
ARF4	1.52205	1.50693e-09	1.27538e-08
DARS	1.521	2.34862e-10	2.43045e-09
TCEAL8	1.52043	4.45847e-07	2.21389e-06
ZNF568	1.51963	4.44069e-06	1.79168e-05
GNL3L	1.51936	1.51868e-08	1.03242e-07
SUPV3L1	1.51893	2.49328e-09	2.00197e-08
MED10	1.51835	1.09322e-07	6.15766e-07
GM2A	1.51815	0.000204784	0.000594128
KAT5	1.51669	7.63959e-10	6.89812e-09
ZNF585A	1.51585	9.70833e-08	5.52969e-07
ATP5J2	1.51526	4.28182e-09	3.26358e-08
ZNF473	1.51425	3.10398e-13	6.67998e-12
ZNF257	1.51364	0.000166788	0.000493029
PSEN2	1.51346	0.000858135	0.00220419
FAM229B	1.51341	3.25798e-05	0.000111
FOPNL	1.51306	8.93085e-10	7.91498e-09
MYL6	1.51262	1.07125e-05	4.01595e-05
FKBP7	1.51244	0.000527309	0.00141108
C6orf203	1.51047	1.81716e-09	1.50253e-08
SDSL	1.50961	0.00104431	0.00263143
RNF113A	1.50945	2.06882e-06	8.9503e-06
SOAT1	1.50943	0.000483351	0.00130221
RABEPK	1.5083	9.56258e-09	6.76319e-08
PSMD9	1.50793	6.15207e-11	7.2437e-10
PGAP2	1.50666	6.21202e-11	7.30612e-10
GJB1	1.50585	0.166819	0.234637
GSTK1	1.50523	9.45563e-08	5.39411e-07
U2AF1L4	1.5048	6.8661e-07	3.27251e-06
EBI3	1.50476	5.30099e-05	0.000172458
PGM1	1.50412	9.43998e-06	3.56708e-05
ARPC3	1.50408	1.78235e-12	3.08256e-11
ADPRM	1.50354	6.3052e-10	5.81817e-09
FARSB	1.50345	1.11554e-09	9.68071e-09
GNG5	1.50334	1.83434e-08	1.22217e-07
DYNLT1	1.50333	1.71374e-07	9.23572e-07
TMEM17	1.50278	6.61333e-10	6.07206e-09
EIF2B4	1.50043	8.91872e-13	1.67005e-11
ZSCAN22	1.49919	6.12801e-12	9.15656e-11
RPS19	1.49694	1.21309e-09	1.04314e-08
ZNF226	1.49667	2.13971e-09	1.74086e-08
LSM3	1.49657	9.12595e-09	6.46993e-08
ALAS1	1.49533	4.03328e-06	1.64243e-05
SOSTDC1	1.49498	0.0199834	0.0371546
PQBP1	1.4938	7.97984e-08	4.62937e-07
SCAMP2	1.49349	3.04414e-09	2.39506e-08
TMEM242	1.49316	2.48533e-06	1.05812e-05
ZNF566	1.49269	9.47184e-10	8.33771e-09
THTPA	1.49267	1.91608e-05	6.83584e-05
GMPPA	1.49156	2.09431e-09	1.70865e-08
SRI	1.49119	2.12126e-08	1.39316e-07
TMEM219	1.49119	1.63682e-09	1.36957e-08
FAM234A	1.48967	2.48103e-05	8.65097e-05
ASB8	1.48902	6.49873e-11	7.59113e-10
EMC3	1.48877	3.20747e-12	5.16493e-11
ZFP3	1.48825	0.000410788	0.00112233
MAPK1IP1L	1.48823	1.28635e-11	1.77105e-10
FAU	1.48817	2.24266e-08	1.4644e-07
LMCD1	1.48812	0.00196507	0.00464609
RFC2	1.48776	2.72061e-06	1.14766e-05
C7orf73	1.48766	5.72095e-06	2.26043e-05
ALDH6A1	1.48692	6.61599e-06	2.57945e-05
PMP2	1.48661	0.159343	0.225414
PPARGC1B	1.48652	1.07702e-05	4.03657e-05
OAZ2	1.48588	5.74587e-13	1.1321e-11
TMEM14C	1.48557	2.04205e-08	1.35139e-07
ALKBH3	1.48517	1.9861e-11	2.6193e-10
LSM5	1.4848	2.16243e-08	1.41641e-07
PIGV	1.48437	4.52101e-11	5.48107e-10
ZNF394	1.48415	3.66118e-10	3.59475e-09
RBM23	1.48409	4.35303e-12	6.80126e-11
HIST1H2BK	1.48394	0.00621402	0.0130888
C11orf98	1.48386	2.09139e-07	1.11083e-06
SLC6A15	1.48352	0.00248059	0.00573686
GEMIN8	1.48345	1.64942e-05	5.95967e-05
MARCH3	1.48314	4.87908e-05	0.000159934
AAR2	1.48237	1.88499e-11	2.4949e-10
CBY1	1.48193	2.76884e-06	1.16707e-05
PSME2	1.48176	2.2882e-07	1.20364e-06
MRPL40	1.48161	1.78226e-06	7.79765e-06
SPRYD4	1.48139	1.36297e-08	9.37828e-08
TRPT1	1.48111	3.58842e-07	1.81868e-06
DPY30	1.48016	7.87216e-12	1.14263e-10
ARHGAP1	1.47982	4.17424e-09	3.19151e-08
PDHX	1.47936	3.25314e-10	3.23731e-09
INTS7	1.4792	4.01414e-10	3.8971e-09
UTP4	1.47771	3.8733e-09	2.98624e-08
USP10	1.47723	1.07015e-10	1.18961e-09
PEX19	1.47682	8.22225e-09	5.89455e-08
COMMD10	1.47637	1.36599e-10	1.48032e-09
HIST1H2BC	1.4762	0.00143537	0.0035017
AAMP	1.47512	1.60388e-11	2.15382e-10
TMEM107	1.47474	1.65118e-06	7.26521e-06
ATPIF1	1.47411	1.93632e-07	1.03256e-06
SUCLA2	1.47371	7.28309e-12	1.06659e-10
UQCC3	1.47353	1.52857e-06	6.77431e-06
TSSC1	1.47279	1.05654e-09	9.22311e-09
LYRM2	1.47174	4.43128e-10	4.26332e-09
C16orf62	1.47151	0.00106617	0.00268055
C9orf85	1.47088	1.16692e-08	8.11278e-08
MRPL27	1.47086	3.11925e-08	1.96717e-07
ZNF844	1.47022	0.000418227	0.00114138
MRPS31	1.46993	1.85903e-09	1.5337e-08
NEU1	1.46929	0.00015687	0.000466428
ZCCHC17	1.46883	1.73803e-07	9.35639e-07
PNKD	1.4685	3.87393e-07	1.95062e-06
HTN1	1.46826	0.0121418	0.0238429
HAT1	1.46821	0.000163183	0.000483341
TIGAR	1.46803	0.000228677	0.000656661
TTI2	1.4672	6.85484e-11	7.9616e-10
MED7	1.46639	1.35429e-10	1.46995e-09
TPMT	1.46607	5.16182e-06	2.05384e-05
PLSCR4	1.46488	0.0100324	0.0200457
RNF7	1.46411	6.69457e-10	6.14281e-09
SNRNP40	1.46285	1.52257e-10	1.62033e-09
STX7	1.46152	0.00107808	0.00270816
MOSPD2	1.4612	0.000900521	0.00230102
MINDY3	1.46017	2.42359e-08	1.57139e-07
PGK1	1.45868	1.2943e-06	5.80425e-06
POLR2K	1.45784	1.48155e-09	1.25535e-08
S100A4	1.45758	0.345848	0.430569
CYB561A3	1.45699	1.15924e-05	4.3205e-05
PSMA3	1.45631	2.03472e-11	2.67383e-10
BUD31	1.45593	7.18343e-10	6.53435e-09
CPPED1	1.45565	0.00190306	0.00451252
SERPINB9	1.45555	0.00354244	0.00791404
ZNF492	1.45513	1.19539e-06	5.4118e-06
HARBI1	1.45396	1.36686e-10	1.48032e-09
SMYD3	1.45339	4.38252e-07	2.18207e-06
FAAP24	1.45313	5.908e-07	2.85939e-06
MED29	1.45244	3.36561e-10	3.34245e-09
ARHGAP6	1.4514	0.00393677	0.00870644
FARS2	1.45127	4.39277e-09	3.3395e-08
SMIM4	1.45109	2.66893e-05	9.24984e-05
ZNF611	1.45101	1.11825e-06	5.08988e-06
TRIAP1	1.45092	7.037e-07	3.3453e-06
IMMP1L	1.45087	2.89772e-11	3.70909e-10
NFYC	1.45055	4.05385e-11	4.97204e-10
SIRT2	1.45033	1.22464e-07	6.84291e-07
HARS	1.45007	1.29158e-08	8.93303e-08
ITIH5	1.44997	0.272935	0.354645
POP4	1.44962	1.69435e-11	2.26292e-10
MCEE	1.44956	1.81166e-08	1.20816e-07
SLC25A19	1.44792	3.64105e-05	0.00012291
TEFM	1.44785	4.13557e-12	6.48905e-11
GPR108	1.44775	1.14627e-10	1.26658e-09
THAP1	1.4476	7.72601e-12	1.12474e-10
ADGRE5	1.44732	9.34246e-05	0.000289235
NARF	1.44724	6.48782e-09	4.7601e-08
HIST1H2AD	1.44569	0.000347735	0.000964744
ZNF79	1.44539	6.87398e-06	2.67154e-05
ZNF17	1.4452	1.09251e-10	1.21172e-09
ZNF576	1.44516	1.61442e-11	2.16403e-10
HEXA	1.44479	4.94004e-05	0.000161824
ZNF791	1.44457	3.8628e-11	4.76952e-10
ACAD10	1.44402	2.81346e-08	1.7918e-07
PDLIM3	1.44377	0.0068916	0.0143527
MTIF3	1.44293	1.85479e-12	3.1891e-11
ZNF280B	1.44276	0.0026321	0.00605301
IFI35	1.44264	8.01302e-06	3.06964e-05
ARL6IP5	1.44246	3.3605e-06	1.39245e-05
ZC2HC1A	1.4424	1.57852e-05	5.72798e-05
TMEM101	1.44216	7.30338e-10	6.63116e-09
RNF170	1.44187	1.26108e-06	5.67776e-06
ADCK1	1.44058	2.78821e-07	1.447e-06
SDHAF3	1.44048	5.59245e-07	2.71828e-06
ERVK3-1	1.44041	2.12612e-10	2.21616e-09
CHCHD3	1.43969	2.86897e-07	1.48368e-06
ARL16	1.43895	2.23878e-07	1.18144e-06
EIF4E2	1.43759	6.06363e-09	4.46446e-08
PSMC4	1.43745	4.93346e-08	2.97829e-07
C16orf89	1.43723	7.38357e-05	0.000232701
ZNF557	1.43698	3.86174e-10	3.76904e-09
DLD	1.4365	1.58713e-07	8.61653e-07
INIP	1.43526	4.7619e-10	4.53335e-09
CYP20A1	1.43377	9.05101e-10	7.99596e-09
DIABLO	1.43366	9.03924e-13	1.68832e-11
TMEM45A	1.43322	0.0198808	0.0369919
NR1H3	1.43293	2.30772e-05	8.11591e-05
CRBN	1.43201	2.12679e-09	1.73131e-08
NTHL1	1.43195	1.33812e-07	7.39835e-07
RBBP4	1.43188	1.18433e-08	8.22989e-08
HKR1	1.43184	2.18609e-05	7.71026e-05
YAE1D1	1.4317	3.15019e-06	1.31418e-05
EFTUD2	1.4308	3.07686e-09	2.41779e-08
CA6	1.43046	0.000965842	0.00244964
MRPS18C	1.4295	3.54938e-09	2.76255e-08
S1PR2	1.42897	0.000158759	0.000471472
IFI16	1.42887	0.00039751	0.00108989
PMVK	1.42855	7.60635e-07	3.59045e-06
HINT1	1.42753	8.38104e-08	4.83355e-07
NDUFB1	1.42695	5.26834e-07	2.57521e-06
CCL2	1.42659	0.27052	0.352066
ENY2	1.42596	4.31065e-09	3.28386e-08
SS18L2	1.42585	4.68451e-10	4.47705e-09
DPP3	1.4256	7.42464e-07	3.50918e-06
VPS72	1.42545	5.56844e-10	5.20357e-09
TMEM246	1.42542	0.0384425	0.066206
CAV1	1.42352	0.0473736	0.0796397
SLC5A6	1.42266	8.2587e-05	0.000258291
FARSA	1.42199	9.86569e-07	4.54746e-06
SAMM50	1.42186	5.95661e-05	0.000191669
APIP	1.42186	1.12099e-08	7.81929e-08
FAH	1.42183	0.000330583	0.000920629
MRPL28	1.4209	2.62886e-09	2.09257e-08
METTL7A	1.42065	0.000910852	0.00232419
UTP15	1.42037	8.59321e-11	9.74383e-10
LGALS12	1.41978	0.00191624	0.00453865
GAL	1.4193	0.000717787	0.0018708
CSGALNACT1	1.41807	0.0200563	0.0372759
UFC1	1.41785	4.55145e-07	2.25626e-06
ZC3HC1	1.41742	3.6771e-09	2.8484e-08
RAB17	1.4169	0.0466374	0.0785954
ATG13	1.41605	6.7814e-09	4.95329e-08
LMAN2	1.41576	8.25889e-08	4.7762e-07
ZNF7	1.41561	4.80321e-10	4.56383e-09
SRP19	1.41544	1.78935e-09	1.48184e-08
YIPF5	1.41508	4.19756e-09	3.20767e-08
RIOK2	1.41497	5.19656e-10	4.89334e-09
ANXA5	1.4122	5.51798e-06	2.18541e-05
ADAMTS4	1.4121	0.0637067	0.103241
ZNF737	1.41092	0.000373833	0.00103132
TMEM14B	1.41	2.57434e-08	1.65744e-07
COPA	1.40948	2.4783e-06	1.05543e-05
ACP2	1.40924	2.53641e-07	1.32614e-06
MRPL46	1.40917	1.89363e-07	1.0131e-06
ZNF845	1.40917	6.24122e-06	2.44694e-05
CAPN3	1.40876	0.206608	0.281066
COPS8	1.40869	3.66993e-07	1.85615e-06
TTC5	1.40826	3.02739e-10	3.0311e-09
SUMF2	1.40743	4.7238e-05	0.000155432
VBP1	1.40661	2.32849e-09	1.87887e-08
PSMC3	1.40646	4.80033e-09	3.61943e-08
ESRP1	1.4052	0.046519	0.0784178
TMEM14A	1.405	1.76067e-06	7.71008e-06
ENO1	1.40419	4.95719e-07	2.43759e-06
PCMT1	1.4041	1.13992e-05	4.25281e-05
SFR1	1.40378	1.43767e-07	7.89246e-07
TMEM141	1.40377	1.11898e-06	5.09091e-06
ZNF567	1.40279	8.95441e-08	5.14407e-07
COMMD3	1.40174	3.4113e-07	1.73488e-06
TMED10	1.40145	4.37827e-06	1.77031e-05
WDR55	1.40118	1.70471e-08	1.14285e-07
STX8	1.4007	5.99831e-07	2.89928e-06
CDK4	1.40036	2.16666e-07	1.14667e-06
NSUN3	1.39976	2.01498e-09	1.64903e-08
COPS5	1.39882	1.09182e-09	9.50289e-09
THYN1	1.39859	5.41543e-07	2.63834e-06
ERCC8	1.39847	1.70519e-08	1.14285e-07
ZNF138	1.3978	4.29893e-05	0.0001426
CNPY2	1.39685	2.05754e-08	1.35993e-07
ACTL6A	1.39602	2.10939e-10	2.20028e-09
ASAH1	1.39501	0.0416136	0.0709287
HACL1	1.39457	7.76358e-05	0.000244102
BET1	1.39395	3.16397e-07	1.62086e-06
ARL14EP	1.39261	2.70347e-09	2.14615e-08
IFIT3	1.39249	0.0382097	0.0658358
EIF3M	1.39233	1.28761e-06	5.7795e-06
ORC5	1.39158	3.36684e-07	1.71464e-06
COPS6	1.39145	9.79537e-09	6.9013e-08
TXN	1.39088	1.53092e-05	5.56898e-05
ZNF438	1.39057	5.52086e-05	0.000178703
B9D2	1.39048	3.41142e-06	1.41077e-05
MRPS22	1.39003	2.14466e-08	1.40664e-07
KIF3A	1.38648	8.7565e-07	4.07584e-06
STK32A	1.38581	0.0503013	0.0839192
AIP	1.38568	0.000548251	0.00146207
CPSF3	1.38556	1.25029e-07	6.95721e-07
SLC35A5	1.38531	8.36111e-10	7.48078e-09
CYB5B	1.38517	2.52204e-09	2.02286e-08
SLC35E3	1.38447	8.42597e-08	4.85566e-07
DHODH	1.38415	7.55134e-10	6.82682e-09
ACTR10	1.3837	3.83284e-09	2.96125e-08
CLNS1A	1.38285	1.8284e-05	6.54915e-05
IMMT	1.38263	5.11015e-11	6.14471e-10
SPAG4	1.38234	0.00839189	0.0171093
AASDHPPT	1.38188	6.79565e-06	2.64389e-05
CFAP20	1.3814	1.95747e-10	2.05493e-09
MRPL51	1.38041	9.59653e-10	8.43738e-09
H2AFZ	1.37944	5.33463e-07	2.60415e-06
PMF1	1.37857	6.30487e-07	3.03117e-06
HIST1H2BN	1.3779	4.91521e-08	2.97093e-07
BCAS3	1.37784	0.0249587	0.0452838
RLBP1	1.37778	0.0977423	0.149414
PTRHD1	1.37741	8.38998e-07	3.9251e-06
GGCT	1.37585	5.11197e-06	2.03511e-05
ZNF616	1.37487	4.18585e-07	2.09406e-06
ZNF250	1.37485	2.34268e-09	1.88818e-08
TSPAN6	1.37425	1.53541e-06	6.80257e-06
KCNE4	1.37419	0.093934	0.144328
ATOX1	1.37311	0.00265422	0.00609911
DCAKD	1.37124	4.85414e-07	2.39181e-06
POLD2	1.37121	2.12542e-08	1.39527e-07
ST3GAL1	1.37068	0.00103471	0.00260902
SEC61B	1.3706	1.16932e-06	5.3052e-06
CKS1B	1.36986	7.34858e-07	3.4777e-06
ERGIC2	1.36981	1.04841e-08	7.34435e-08
PIGM	1.36878	1.29739e-06	5.81276e-06
CLEC2B	1.36848	0.0321675	0.0566859
GIMAP5	1.36819	0.000334083	0.000928793
PIGT	1.36794	5.14698e-07	2.52007e-06
CCDC28B	1.36767	0.00034448	0.000956252
PPT1	1.36702	9.79539e-07	4.52223e-06
CMC2	1.36698	1.00658e-10	1.12489e-09
TBXAS1	1.36615	0.00678494	0.0141566
DTL	1.36569	8.6389e-07	4.0262e-06
SNRPG	1.36518	5.82286e-09	4.29794e-08
CHRNB1	1.36482	0.00028327	0.00079915
PRCP	1.36451	1.65006e-05	5.95967e-05
ALKBH2	1.3635	1.27453e-05	4.71677e-05
TANK	1.36339	1.41684e-07	7.78969e-07
SPTLC1	1.36336	1.57413e-08	1.06471e-07
SLC25A26	1.36246	9.04212e-08	5.1904e-07
ELOF1	1.3621	4.71292e-07	2.32896e-06
C1orf74	1.36173	6.65126e-08	3.9126e-07
SNX32	1.36146	1.91462e-05	6.83301e-05
RPA3	1.36141	1.10152e-06	5.02918e-06
PAIP2	1.36096	5.24244e-09	3.90674e-08
PSEN1	1.36005	9.88081e-09	6.95484e-08
PRDX3	1.35955	8.60513e-10	7.66809e-09
TIMM9	1.35944	5.28128e-09	3.9337e-08
SIL1	1.359	2.34264e-06	1.00346e-05
ACOT13	1.35878	5.1725e-06	2.05754e-05
NIF3L1	1.35849	5.17643e-11	6.21425e-10
DXO	1.35751	4.52761e-07	2.24595e-06
MRPL39	1.35651	1.39775e-09	1.18845e-08
GALE	1.35553	3.43041e-05	0.00011636
SOD1	1.35508	6.06547e-10	5.62517e-09
MDM2	1.35501	0.00511914	0.0110167
HS1BP3	1.35499	1.66262e-06	7.31336e-06
SLC29A1	1.35481	9.47795e-05	0.000292875
SMUG1	1.35461	1.035e-07	5.84991e-07
GPR155	1.35312	0.0365015	0.0633226
MPC2	1.35251	3.34971e-08	2.09881e-07
VDAC3	1.35195	1.21015e-07	6.76707e-07
BBS12	1.35181	0.000102151	0.000314005
CYB561D2	1.35173	1.08162e-05	4.05174e-05
HDX	1.35169	6.38278e-07	3.06299e-06
ORC3	1.35067	3.35899e-07	1.71124e-06
C12orf73	1.3506	1.20232e-07	6.72844e-07
PSMD4	1.35	6.29306e-08	3.71824e-07
NAPA	1.34994	2.17687e-07	1.15083e-06
MAGT1	1.34959	3.46722e-07	1.76272e-06
MED31	1.34947	1.22364e-06	5.52101e-06
BCL2A1	1.34927	0.197586	0.270771
IFNAR1	1.34918	5.22233e-09	3.89373e-08
ZNF527	1.34886	1.19474e-10	1.31422e-09
FCGR2B	1.34878	0.00489714	0.0105839
SUMO1	1.34863	5.2211e-10	4.91331e-09
AKR1B1	1.34682	0.000394131	0.00108164
OAT	1.34615	4.7456e-05	0.000156115
BROX	1.34578	4.92879e-09	3.69923e-08
AK2	1.34518	3.80556e-08	2.35238e-07
HIGD1A	1.34509	3.963e-08	2.4415e-07
STMN1	1.34446	2.37694e-06	1.01727e-05
MANBAL	1.34417	2.46932e-08	1.59541e-07
PPP1R7	1.34348	2.60308e-08	1.67302e-07
ZNF823	1.34302	0.000182347	0.000534723
RPL23A	1.34165	1.81763e-06	7.93355e-06
COX16	1.34156	3.37604e-11	4.22882e-10
PLN	1.34072	0.110701	0.165967
CPN1	1.34071	0.139065	0.201254
PSME3	1.33991	4.77616e-10	4.54296e-09
TOMM7	1.33956	1.21231e-06	5.47909e-06
XRCC4	1.33872	2.24343e-07	1.18347e-06
TALDO1	1.33672	1.22885e-07	6.85862e-07
DYNC2LI1	1.33645	1.32027e-07	7.30791e-07
ZNF66	1.33612	4.91064e-08	2.96939e-07
PAK1IP1	1.33585	4.8339e-08	2.93141e-07
TTC32	1.33545	3.77966e-05	0.000127029
H3F3B	1.33493	1.2705e-07	7.05896e-07
MVP	1.33479	0.0280855	0.050318
KANSL2	1.33398	3.24211e-09	2.53816e-08
NME7	1.33363	5.0276e-05	0.000164509
CHCHD7	1.3336	3.94106e-06	1.609e-05
UFSP2	1.33253	7.85456e-09	5.65021e-08
KDM8	1.33218	2.82472e-09	2.23758e-08
NRM	1.33053	3.08551e-05	0.000105635
M6PR	1.33017	3.33877e-06	1.38462e-05
PFDN5	1.32925	8.04852e-09	5.78127e-08
IMMP2L	1.32844	0.000140178	0.000419508
HIST1H3D	1.3272	0.000140044	0.000419191
PIGC	1.32714	3.96539e-08	2.44195e-07
ZNF528	1.32647	0.0030966	0.00700304
AIFM1	1.32617	2.67121e-06	1.12974e-05
GSN	1.326	0.0154578	0.0295503
ZNF548	1.32536	2.2854e-07	1.20302e-06
PIN4	1.32527	2.12208e-07	1.12429e-06
POSTN	1.32524	0.109359	0.16424
CEP68	1.3252	4.74381e-10	4.51905e-09
COG2	1.32491	1.6953e-09	1.41528e-08
RRP8	1.32459	5.89021e-10	5.48684e-09
NTPCR	1.32377	3.75414e-09	2.90502e-08
TNFSF13	1.32365	0.00226229	0.00528012
ZBTB20	1.3235	1.57637e-11	2.12463e-10
LLPH	1.32334	1.26751e-11	1.74838e-10
MRPS35	1.32319	1.90243e-07	1.01722e-06
RCHY1	1.32286	3.91866e-06	1.6003e-05
ZNF667	1.32271	0.000658797	0.00172961
PGD	1.32269	2.72252e-05	9.42161e-05
SRPRB	1.32241	4.65712e-07	2.30553e-06
SPTY2D1-AS1	1.32188	3.37446e-06	1.39705e-05
AARS	1.32133	4.98707e-05	0.000163256
TRIM13	1.32101	1.14471e-08	7.97259e-08
NCK1	1.32086	6.28644e-11	7.37242e-10
C8orf59	1.32061	1.08042e-08	7.56141e-08
ECSIT	1.31839	4.09615e-05	0.000136706
RPS5	1.31779	2.98287e-07	1.53718e-06
TCEAL9	1.31603	2.49044e-05	8.68174e-05
GRN	1.3159	0.000122391	0.000369811
MINDY1	1.31532	0.000661354	0.00173477
IDH3B	1.31503	1.01204e-05	3.80563e-05
LHFPL1	1.31457	0.000251439	0.000716077
SERINC3	1.31382	6.45092e-07	3.09266e-06
AAAS	1.31209	2.62606e-09	2.09166e-08
LRRC52	1.31038	0.000123654	0.000373245
HYLS1	1.3101	0.000189293	0.000553002
CINP	1.30912	1.8026e-08	1.20344e-07
VPS33A	1.30822	8.60694e-10	7.66809e-09
ZNHIT3	1.30788	2.60752e-10	2.66325e-09
CHMP4A	1.30782	2.58938e-06	1.0986e-05
ZNF585B	1.30775	0.000194234	0.000566422
SORBS2	1.30667	0.0248775	0.0451476
PRUNE1	1.30633	3.09072e-06	1.29121e-05
POLR2L	1.30578	9.4666e-07	4.38419e-06
HIST2H4A	1.30445	1.43836e-07	7.89327e-07
PSMD7	1.30441	4.85672e-08	2.94161e-07
ZNF160	1.30363	5.33106e-05	0.00017336
TSPAN31	1.30318	4.1927e-05	0.000139548
ATP4B	1.30219	2.07232e-08	1.36712e-07
RARS2	1.30197	6.20151e-07	2.9916e-06
SF3B5	1.30178	1.18653e-07	6.64762e-07
SCG3	1.30177	0.00099847	0.00252847
S100A6	1.30171	0.0881561	0.136577
YPEL5	1.30058	0.000176149	0.000518303
WDR92	1.30033	1.53643e-09	1.29737e-08
TMEM184C	1.30003	3.46969e-10	3.42731e-09
TMEM116	1.29904	1.86422e-07	9.98094e-07
SCFD1	1.29888	6.99318e-07	3.32769e-06
RAB36	1.29823	0.00871763	0.017695
SLC13A3	1.29799	0.0133044	0.0258534
PHAX	1.29771	1.83655e-10	1.93212e-09
TMEM9	1.29695	2.30712e-06	9.89113e-06
MCM3	1.29611	7.1309e-05	0.000225462
FTO	1.29589	2.20085e-07	1.16267e-06
NIPSNAP3A	1.29552	8.15397e-05	0.000255449
SNX17	1.29502	8.14762e-10	7.32987e-09
PFDN1	1.29442	1.90087e-06	8.27233e-06
NRSN2	1.2943	3.0135e-05	0.000103338
CWC15	1.29357	1.82898e-05	6.54961e-05
SEM1	1.29338	8.32541e-08	4.809e-07
TOMM5	1.29157	1.74584e-06	7.65422e-06
NXF1	1.29112	2.55324e-10	2.61507e-09
SCML4	1.291	0.0939863	0.144348
TMEM68	1.29052	9.23659e-08	5.28144e-07
ABHD10	1.29047	2.02373e-07	1.07683e-06
HIST1H4J	1.29034	2.92131e-10	2.94291e-09
PSMD10	1.2898	5.0355e-09	3.76206e-08
FMC1	1.28946	3.09093e-05	0.000105796
SPX	1.2894	0.00731935	0.015145
METTL25	1.28906	4.21648e-09	3.22045e-08
MRPS11	1.28902	3.71007e-06	1.52315e-05
RNASEL	1.28901	2.45728e-05	8.57631e-05
METTL12	1.28849	2.56372e-06	1.08897e-05
NIFK	1.28832	1.56327e-08	1.0598e-07
NSMCE2	1.28785	4.27092e-08	2.61044e-07
SRP14	1.28766	4.87943e-08	2.95416e-07
MTRNR2L8	1.28764	0.00167523	0.00401564
SLITRK2	1.28741	0.0147631	0.0283548
PRR19	1.28687	5.75576e-08	3.43386e-07
NINJ2	1.28663	0.000239465	0.000685156
OGFOD1	1.28557	8.23048e-09	5.89471e-08
SIRT5	1.28541	9.30201e-06	3.52036e-05
RFXANK	1.28414	4.61735e-10	4.42436e-09
PARS2	1.28411	4.86194e-07	2.39485e-06
SFT2D1	1.28372	6.17169e-08	3.65827e-07
NUBP1	1.28344	1.61829e-06	7.13024e-06
LRR1	1.28309	1.51635e-06	6.72504e-06
GMNN	1.28279	2.97062e-05	0.000102051
SNAP47	1.2826	6.23909e-10	5.7644e-09
EIF1AD	1.28182	2.45569e-08	1.5887e-07
PPP2R3C	1.28028	1.92537e-07	1.02783e-06
CLCC1	1.28013	2.26889e-06	9.73574e-06
PWP1	1.28005	3.42826e-08	2.14074e-07
NPRL2	1.2798	1.68797e-07	9.11691e-07
CHI3L2	1.27978	0.0302785	0.0537757
COPS9	1.2792	3.57822e-06	1.47354e-05
HKDC1	1.27914	0.0423787	0.0721158
LMBRD1	1.27892	0.000142116	0.000425017
DRG1	1.27873	8.56956e-08	4.93337e-07
C1QTNF6	1.2779	0.00759073	0.0156318
TOMM6	1.27689	6.39676e-07	3.0687e-06
ING4	1.27688	0.00042912	0.00116786
STRAP	1.27684	7.00109e-09	5.09101e-08
MRPL10	1.27682	9.28062e-08	5.30395e-07
HIBCH	1.27673	9.33597e-05	0.000289095
CCT5	1.27659	1.51207e-05	5.5098e-05
ABCF2	1.27624	4.81466e-06	1.9277e-05
GPKOW	1.27596	1.87979e-09	1.54996e-08
PUS3	1.27343	3.21499e-06	1.33894e-05
SCG2	1.27307	0.147024	0.210968
B4GALT3	1.27297	1.51089e-05	5.50837e-05
CLUAP1	1.27296	1.45373e-07	7.96576e-07
DUS2	1.27294	2.70525e-07	1.40543e-06
TRIM32	1.27289	4.35673e-06	1.76271e-05
PPP1CA	1.2728	3.22217e-06	1.34117e-05
C1orf43	1.27271	5.54884e-08	3.31713e-07
EMC7	1.27265	9.44448e-07	4.37532e-06
PRMT5	1.27259	1.25517e-07	6.98171e-07
AP5S1	1.27155	2.24618e-07	1.1845e-06
FEN1	1.27153	5.37684e-05	0.000174694
BLOC1S1	1.27153	0.00219671	0.00514254
SSBP2	1.27105	7.91697e-05	0.000248554
CDC23	1.27086	3.41546e-08	2.13637e-07
SLC16A1	1.2708	1.56001e-06	6.90116e-06
IER3IP1	1.27021	1.1322e-08	7.89002e-08
ZNF83	1.26979	0.00947034	0.0190442
MAT2B	1.26969	1.82487e-07	9.79878e-07
ACP1	1.2692	8.65242e-10	7.70085e-09
CCL28	1.26882	0.00554441	0.0118196
SIAE	1.26856	0.00328733	0.00739349
NUDT1	1.26852	3.2151e-05	0.000109653
ZNF433	1.26842	0.000349713	0.000969319
CALM2	1.26841	1.71958e-06	7.54812e-06
ZNF20	1.26797	8.59754e-07	4.012e-06
ICA1	1.26779	0.0167089	0.0317523
HMBOX1	1.26753	1.81622e-05	6.50866e-05
GNG2	1.26743	0.0541919	0.0896881
CAPZA2	1.26689	7.51641e-10	6.79942e-09
TRPV2	1.26683	0.0706829	0.113126
MECR	1.26683	3.60404e-10	3.54337e-09
C2orf42	1.26557	1.08298e-11	1.52822e-10
IFT57	1.2655	0.000793159	0.0020491
STIP1	1.2654	3.12826e-07	1.60313e-06
SLC35F6	1.265	1.29597e-06	5.8082e-06
BRCC3	1.2646	1.98454e-08	1.31657e-07
SNRPB2	1.26384	0.00180075	0.0042879
KLHDC8B	1.26371	7.50856e-05	0.000236539
CETN2	1.26355	1.33344e-05	4.91009e-05
FGFBP2	1.26333	0.174917	0.244369
TADA1	1.26301	4.03311e-06	1.64243e-05
FAR2	1.26289	0.0070078	0.0145597
ZNF22	1.26251	0.0207289	0.0384243
SELENOK	1.26019	2.00285e-08	1.32724e-07
WDR83	1.25986	4.43983e-07	2.20613e-06
INPP5B	1.25899	2.32844e-07	1.22262e-06
ZNF140	1.25882	0.000332037	0.000924154
UTP11	1.25838	2.51664e-07	1.31768e-06
ZNF714	1.2583	0.000115498	0.000351147
CTSL	1.2577	0.028805	0.0514505
DLEU1	1.25766	8.20142e-10	7.3591e-09
FAM200B	1.2553	5.69098e-06	2.2504e-05
CRYZL1	1.25519	4.75395e-08	2.8853e-07
ISCA1	1.25505	5.07662e-06	2.02377e-05
FTSJ1	1.25489	1.7756e-05	6.37552e-05
TAF8	1.25411	4.04405e-09	3.10001e-08
GREM2	1.25321	0.00284493	0.00648971
EXOSC2	1.25302	3.49667e-06	1.4427e-05
DUSP11	1.25286	4.29167e-11	5.21832e-10
ST7	1.25271	0.000544369	0.00145251
ADAT1	1.25225	6.8383e-08	4.013e-07
FCMR	1.25161	0.0107315	0.0213037
CEACAM1	1.25159	0.175362	0.244875
ATP6V1C1	1.25104	0.000227334	0.00065337
MAT2A	1.25087	4.85216e-08	2.94006e-07
MIEN1	1.24783	1.1626e-05	4.33194e-05
RNASEH2A	1.24723	1.92462e-05	6.86373e-05
IQCK	1.24682	0.000409955	0.00112026
DERA	1.24675	0.000100646	0.000309898
ABI1	1.24626	4.73684e-06	1.89861e-05
DDX39A	1.2462	1.2036e-05	4.47563e-05
NPTX1	1.24569	0.21486	0.29052
ZNF225	1.24544	2.95854e-08	1.87527e-07
FAM86C1	1.24511	4.96199e-05	0.000162471
ZNF813	1.24509	0.000146279	0.000436701
NINJ1	1.24482	0.0134049	0.0260385
HENMT1	1.24454	0.0759977	0.120485
MRPS27	1.24446	7.03668e-07	3.3453e-06
RAB11A	1.24437	3.17156e-08	1.99825e-07
BOLA2B	1.24348	1.38048e-07	7.60401e-07
MCRIP1	1.24287	1.78179e-05	6.3915e-05
NCOA4	1.24186	4.51542e-08	2.75027e-07
RPL36AL	1.24056	7.72008e-07	3.63597e-06
COQ3	1.23969	4.12398e-05	0.00013751
METTL5	1.23858	2.17204e-07	1.14869e-06
OSBPL1A	1.23805	0.000169727	0.000501213
ERP44	1.23783	6.28787e-07	3.02731e-06
ZNF317	1.23723	8.48201e-09	6.05928e-08
PDCD10	1.23633	1.12686e-07	6.33502e-07
CELF2	1.23617	0.0865558	0.134551
PTGS2	1.23612	0.0902569	0.139389
DPCD	1.23595	0.00648529	0.0135911
FASTKD2	1.23557	2.2587e-06	9.69765e-06
MLST8	1.23533	2.20671e-07	1.16535e-06
RHEBL1	1.2352	0.00161807	0.00389767
HMGN3	1.23489	0.000127754	0.000384675
ZNF345	1.23477	9.46713e-06	3.5755e-05
FAXDC2	1.23437	0.00437461	0.00956126
RPS18	1.23436	1.29074e-05	4.76716e-05
ZNF320	1.23394	0.0321185	0.0566402
CLPB	1.23366	6.86436e-05	0.00021765
ELOA	1.23305	3.24456e-08	2.03987e-07
B3GALT1	1.23155	0.00706397	0.0146681
CBWD2	1.23024	1.74643e-06	7.65456e-06
ALG12	1.23021	7.65014e-06	2.94365e-05
TLR2	1.22927	0.00684285	0.0142613
UBL5	1.22924	3.8485e-07	1.9398e-06
NFU1	1.22923	1.57259e-11	2.12148e-10
METTL2A	1.22857	4.52968e-08	2.75715e-07
LCN1	1.22807	4.54963e-14	1.22192e-12
GPR18	1.22729	4.4022e-06	1.77852e-05
STT3A	1.2271	1.34485e-05	4.94963e-05
RBM18	1.22602	1.66761e-08	1.12226e-07
ZNF593	1.22595	9.17503e-17	5.33072e-15
RAP1GAP	1.22564	0.0448792	0.0759757
C5orf15	1.22522	0.000206895	0.000599663
ZCRB1	1.22466	4.98049e-06	1.99138e-05
DPYSL2	1.22457	0.0110991	0.0219596
ZNF691	1.22391	2.43283e-09	1.95663e-08
ARPC1A	1.2238	5.53674e-07	2.69299e-06
ZNF239	1.22377	0.0127663	0.0249263
SERPINA3	1.22358	0.437203	0.51956
TMEM138	1.22333	3.24412e-06	1.34916e-05
VTA1	1.22326	9.80175e-08	5.57858e-07
SELENOP	1.22326	0.0591303	0.0965583
KBTBD6	1.22319	2.51822e-07	1.31803e-06
ARL1	1.22296	1.22613e-07	6.84862e-07
PDRG1	1.22295	9.89276e-07	4.55574e-06
UGDH	1.22273	0.00084873	0.0021827
INO80C	1.2226	6.2765e-07	3.02282e-06
MEA1	1.22174	3.52518e-06	1.45251e-05
SCRN2	1.22146	1.62249e-05	5.86584e-05
POGLUT1	1.22141	4.68551e-06	1.88162e-05
TSN	1.22124	2.60351e-09	2.07914e-08
QTRT1	1.22114	4.77822e-09	3.60642e-08
ALDH7A1	1.22114	0.000497366	0.00133752
C1GALT1C1	1.22103	0.0029097	0.00662208
BTF3	1.221	8.67205e-06	3.30404e-05
CAPZA1	1.22091	4.32438e-06	1.75045e-05
FKBP3	1.22009	7.07028e-07	3.35895e-06
TIPRL	1.2195	1.04512e-07	5.90256e-07
PXMP4	1.21837	1.6713e-06	7.34492e-06
LURAP1	1.21804	0.0085316	0.0173508
TULP3	1.21779	3.18655e-05	0.000108841
RPL15	1.21758	8.49215e-07	3.96761e-06
MED21	1.21722	5.54723e-09	4.10685e-08
UBB	1.21629	0.105461	0.15923
INTS13	1.21554	2.83321e-07	1.46673e-06
CRYL1	1.21552	0.0073756	0.0152485
ZNF724	1.21541	0.00192445	0.00455663
BAALC	1.21522	0.196633	0.26964
RARS	1.21515	1.38342e-06	6.17194e-06
CHCHD4	1.21489	0.00016711	0.000493879
TMEM209	1.21426	1.68539e-05	6.07531e-05
RIBC2	1.21422	0.00689867	0.0143613
PXDN	1.21421	0.3345	0.41935
PTGIS	1.21416	2.05446e-05	7.2879e-05
ZNF77	1.2135	6.58813e-09	4.82648e-08
CDK5	1.21341	0.000217016	0.000626652
ELOC	1.21263	7.32508e-10	6.64677e-09
KRT79	1.21252	0.000157569	0.00046822
METTL1	1.21246	4.03411e-06	1.64243e-05
PIGU	1.21219	1.92463e-09	1.5825e-08
PCDHB11	1.2116	0.0039374	0.00870653
TVP23B	1.211	7.9919e-07	3.75199e-06
SMC1B	1.2109	4.13506e-05	0.000137817
CD46	1.21025	5.99323e-08	3.56686e-07
ZNF234	1.20962	8.78147e-06	3.33796e-05
CXorf65	1.20942	9.21237e-08	5.27168e-07
KDM4D	1.20755	2.7453e-08	1.75523e-07
TANGO2	1.2068	0.00401611	0.00886048
PTGR2	1.20674	2.57426e-06	1.09282e-05
SEC61G	1.20671	0.00090269	0.00230576
SLC25A11	1.20639	5.78439e-06	2.28121e-05
TAMM41	1.2063	1.34252e-08	9.25493e-08
EDA2R	1.20623	0.167343	0.235239
RBM4	1.20606	1.24358e-09	1.06723e-08
TRMT10C	1.20587	2.00484e-06	8.69651e-06
HSPE1	1.20462	1.17553e-05	4.37458e-05
PRG2	1.20451	6.9792e-06	2.70573e-05
RANGRF	1.20433	0.000107589	0.000329551
SERINC1	1.20391	3.32643e-06	1.37989e-05
LITAF	1.20387	0.00998132	0.0199626
ARPC5	1.20374	1.29674e-07	7.1885e-07
DEPDC7	1.20334	0.0865231	0.134528
ZNF555	1.20324	9.66835e-11	1.08459e-09
PLAUR	1.20282	0.0844497	0.131792
RPS13	1.20234	5.72372e-06	2.26092e-05
KIF17	1.20141	0.0554819	0.0914734
ZNF888	1.2014	0.00362764	0.00809086
METTL21B	1.20091	1.57203e-05	5.70864e-05
C9orf64	1.20089	0.0267325	0.0481459
N6AMT1	1.20081	3.05941e-07	1.57442e-06
ZNF600	1.20046	0.00129501	0.00319261
TAGLN2	1.20037	0.00670169	0.0139968
ANAPC16	1.20012	2.58098e-06	1.09535e-05
CRIPT	1.19958	9.31972e-07	4.32433e-06
PNPO	1.1986	1.93053e-07	1.02985e-06
PLA2G15	1.19834	1.28078e-05	4.73751e-05
ZNF330	1.19757	2.7849e-06	1.1731e-05
C1orf123	1.19722	5.75145e-09	4.24949e-08
MLIP	1.19697	0.0141812	0.0273765
MUT	1.19669	6.74993e-07	3.22694e-06
RPS26	1.19635	3.06534e-07	1.57692e-06
CRTAC1	1.19565	0.0511123	0.085089
RFC3	1.19554	0.00014789	0.000441332
BCAP31	1.19448	1.5441e-06	6.83695e-06
CCDC22	1.19445	3.41965e-06	1.41338e-05
SMIM7	1.19442	5.20342e-11	6.23648e-10
SARDH	1.194	0.0015567	0.00376339
WIPF3	1.19373	0.0191675	0.0358368
DFFA	1.19328	0.000244245	0.00069802
RCBTB2	1.19314	0.00328049	0.00738035
SIGIRR	1.1928	0.0249282	0.045234
RBM48	1.19277	2.89574e-07	1.49594e-06
CISD2	1.19269	1.27016e-08	8.80139e-08
SLC35B4	1.1925	0.000125145	0.000377358
SPRYD3	1.1918	7.52403e-06	2.9012e-05
C11orf58	1.19144	8.08002e-09	5.80106e-08
ZNF726	1.19068	5.23708e-06	2.08154e-05
HSCB	1.19061	4.26409e-06	1.72747e-05
DNAJC12	1.19027	0.0370391	0.0641192
POPDC2	1.19025	1.31635e-06	5.89234e-06
MRPS33	1.19005	7.27125e-07	3.44443e-06
CCDC115	1.18975	2.0119e-06	8.72199e-06
OSCP1	1.18966	0.000224683	0.000646506
CHMP1B	1.18861	0.000446386	0.0012106
POP5	1.18835	2.89752e-07	1.49634e-06
MYL6B	1.18779	9.88112e-07	4.55181e-06
ATXN7L3B	1.18763	1.3439e-06	6.01017e-06
ZNF92	1.18754	0.000330787	0.000921021
MMP10	1.18735	0.000106406	0.000326404
SRGN	1.18715	0.167201	0.235085
COX17	1.18713	4.80794e-06	1.92605e-05
ACSBG1	1.1867	0.000120347	0.000364009
PJA1	1.18645	1.48723e-05	5.42613e-05
PSAP	1.18641	0.000470493	0.00127082
BSG	1.18636	1.51874e-06	6.73277e-06
FUNDC1	1.18635	1.63784e-06	7.20866e-06
SH3BGR	1.18416	0.00215415	0.00504852
QRSL1	1.18394	1.18423e-06	5.36621e-06
SNRPB	1.18392	3.824e-06	1.56512e-05
FBXO3	1.18384	1.5706e-07	8.54254e-07
NRN1	1.18324	0.141387	0.204073
GLA	1.183	0.00141765	0.00346249
DAP3	1.18295	8.05818e-07	3.77948e-06
RBBP5	1.1827	1.69409e-07	9.13989e-07
DEPDC4	1.18253	3.27284e-11	4.11004e-10
NUFIP1	1.18196	8.57088e-08	4.93337e-07
HNRNPK	1.18185	2.0155e-10	2.10982e-09
ZNF680	1.1818	0.00120353	0.00299064
CMBL	1.18147	0.195158	0.267966
ZNF765	1.181	1.25043e-08	8.66876e-08
RHNO1	1.18041	3.34503e-05	0.000113741
DRAM2	1.18003	3.5747e-06	1.4725e-05
POLB	1.17943	4.42858e-05	0.000146537
TMEM229B	1.17899	0.0379907	0.0655276
GLRA2	1.17788	4.22163e-07	2.11053e-06
FDXACB1	1.17764	3.45976e-06	1.42835e-05
INHA	1.17754	0.0206823	0.0383524
TNFAIP1	1.17585	1.37067e-05	5.03835e-05
RARRES3	1.17566	0.0725579	0.115712
TMLHE	1.17549	2.4308e-08	1.57398e-07
IKBKE	1.17497	0.00386272	0.00855424
C11orf70	1.17481	1.6654e-06	7.32119e-06
CSTF1	1.17479	3.00331e-08	1.90201e-07
LAPTM4A	1.17419	3.84061e-06	1.57104e-05
SLC31A1	1.1735	0.0100889	0.0201505
TOR1AIP2	1.17307	3.21798e-06	1.33981e-05
SLC35C2	1.17274	2.21782e-07	1.1708e-06
BFSP1	1.17267	0.0301958	0.0536417
C12orf76	1.17266	7.25775e-05	0.000229226
CCNC	1.17212	8.04341e-06	3.08048e-05
ZNF682	1.17116	0.00540908	0.0115596
CASP4	1.17036	0.00648792	0.0135928
ATP5E	1.17014	8.72284e-06	3.31996e-05
LMAN2L	1.16995	2.61562e-06	1.10942e-05
MYCBP	1.16977	1.8598e-06	8.10556e-06
MAOB	1.16941	0.0348623	0.0608231
UBIAD1	1.1688	5.46748e-08	3.27648e-07
ACLY	1.16879	1.89849e-06	8.26442e-06
NARS	1.16847	2.09611e-07	1.11294e-06
CCDC163	1.16646	0.00598877	0.0126606
NAA20	1.16625	4.69618e-06	1.88487e-05
PRPF31	1.16617	1.3542e-07	7.47976e-07
KCNRG	1.16597	7.88663e-08	4.57891e-07
ZNF665	1.16596	1.34685e-08	9.27608e-08
GLB1	1.16543	2.63874e-05	9.15533e-05
MYC	1.16512	0.0374272	0.0647225
SIRT4	1.16499	3.65619e-06	1.5027e-05
ARL6IP1	1.16459	2.33326e-05	8.19202e-05
NIP7	1.16456	8.89393e-07	4.13458e-06
DERL2	1.16451	4.6681e-07	2.30942e-06
TAF12	1.16394	6.1096e-06	2.3979e-05
MAGEA10	1.16382	0.271685	0.353363
GRIK3	1.16249	0.000763392	0.00197879
BLVRA	1.16201	8.19809e-05	0.000256559
C1R	1.16164	0.134744	0.196023
NSL1	1.16163	4.26685e-08	2.60904e-07
TIMM8A	1.16162	5.03346e-05	0.000164664
SDHAF2	1.16161	1.86785e-08	1.24281e-07
NDFIP2	1.1616	6.21262e-07	2.99598e-06
AFMID	1.16155	5.12321e-05	0.00016734
EIF3I	1.16134	1.6177e-06	7.13024e-06
MMS19	1.16115	1.38765e-07	7.64063e-07
PTRH2	1.16101	1.31449e-07	7.28411e-07
UBXN8	1.15964	1.70654e-05	6.14406e-05
RDH11	1.15948	7.59885e-06	2.92468e-05
GPN3	1.15914	3.35512e-08	2.10041e-07
SPATA18	1.15874	0.052966	0.0878964
TIMM22	1.15862	2.82051e-07	1.4617e-06
CNIH1	1.15667	9.58781e-07	4.43335e-06
NMRAL1	1.15663	1.30021e-06	5.82363e-06
RNF121	1.15609	3.18865e-05	0.000108888
NACA	1.15586	2.12433e-06	9.16084e-06
PYCR1	1.1558	0.000407496	0.00111499
LAP3	1.1552	2.09972e-05	7.42521e-05
PPAT	1.15475	4.81766e-07	2.37542e-06
CATSPERD	1.15463	7.97395e-18	6.20955e-16
TMCO4	1.15404	0.000150515	0.000448529
GTF2B	1.15385	6.96829e-09	5.07217e-08
BYSL	1.15307	1.25203e-05	4.63816e-05
DCLRE1C	1.15306	7.00528e-05	0.000221776
IL33	1.15269	2.78945e-05	9.63508e-05
ABCF3	1.15254	1.44794e-08	9.889e-08
DRG2	1.15161	7.67351e-07	3.61751e-06
RAPGEF4	1.15072	0.0334628	0.058701
IDNK	1.15063	0.00066355	0.00173991
EMG1	1.15048	2.81206e-05	9.70863e-05
CBLL1	1.15004	2.89433e-08	1.83773e-07
DPPA3	1.14939	8.36028e-16	3.70622e-14
DNAJC8	1.14922	3.85156e-08	2.37882e-07
MPPE1	1.14909	1.53511e-08	1.04263e-07
ASNA1	1.14904	8.16444e-08	4.72715e-07
ARSE	1.14887	0.0489589	0.0820049
POLR1D	1.1487	2.57927e-07	1.34568e-06
VAMP7	1.14676	3.06682e-05	0.00010502
VAMP7	1.14676	3.06682e-05	0.00010502
CLYBL	1.14513	0.000283584	0.000799884
JAZF1	1.14508	0.00949699	0.0190848
SF3B4	1.14484	1.19428e-05	4.44209e-05
SNAPC5	1.14431	7.52671e-06	2.90147e-05
DYNLRB1	1.14287	8.7472e-06	3.3269e-05
SLC17A5	1.14282	0.00183692	0.00436906
CDPF1	1.14223	1.6375e-06	7.20866e-06
CLN3	1.14218	4.81364e-05	0.000158
TRAFD1	1.14157	6.07214e-07	2.93016e-06
SLC30A7	1.14098	2.75354e-07	1.43002e-06
NOL12	1.14042	6.75321e-06	2.62946e-05
ZNF146	1.14021	2.05763e-05	7.2974e-05
STPG1	1.13949	6.81638e-07	3.25303e-06
OSER1	1.13921	3.5774e-07	1.81372e-06
WDR61	1.13903	0.000416519	0.00113693
ZCCHC10	1.13807	9.19468e-09	6.51238e-08
MT1G	1.13729	0.00445884	0.00972945
ELP6	1.13635	7.15915e-07	3.39679e-06
QPRT	1.13632	0.211479	0.286712
ZNF268	1.13597	3.54972e-07	1.80093e-06
BTG2	1.1356	0.0434166	0.0737074
DCAF4	1.1345	0.000632094	0.00166514
LIPT1	1.13423	3.71664e-09	2.87751e-08
COX7A2L	1.13363	1.23832e-07	6.89839e-07
GPX8	1.13356	0.0107573	0.0213413
NARFL	1.13332	6.70614e-09	4.90562e-08
EIF2B3	1.1332	6.56181e-07	3.14377e-06
MTRNR2L1	1.13192	0.000275257	0.000777737
CCNH	1.13182	3.98964e-05	0.000133363
C1orf54	1.13076	0.000738856	0.00192113
SLAMF9	1.13053	0.186221	0.257594
SDF2	1.13036	9.94444e-08	5.65324e-07
LYRM1	1.1301	1.03627e-05	3.89274e-05
UQCC1	1.13006	5.67286e-06	2.24383e-05
PLS3	1.12957	2.64116e-05	9.15943e-05
MED6	1.12956	9.86366e-08	5.61084e-07
YARS	1.12906	7.34523e-05	0.000231691
RBM7	1.12878	4.52257e-06	1.82116e-05
ZNF829	1.12872	0.00490311	0.0105905
NAXD	1.12856	3.29509e-07	1.68276e-06
TCTEX1D2	1.12829	0.00178796	0.00426019
IRF9	1.12818	0.0132494	0.0257671
GSS	1.12722	2.61268e-05	9.07349e-05
PLEKHB2	1.12673	9.23421e-06	3.49651e-05
ARRDC3	1.12588	0.0216586	0.0399713
MRPL18	1.12504	6.19101e-06	2.42855e-05
LRTOMT	1.12472	4.41617e-06	1.78368e-05
SQLE	1.12464	0.00947875	0.0190533
AARSD1	1.12458	4.22476e-08	2.58976e-07
COPB2	1.12344	7.74147e-07	3.64371e-06
SNX11	1.12328	5.96767e-07	2.88637e-06
PC	1.12305	0.00187174	0.00444399
HDHD2	1.12296	4.84658e-05	0.000158975
RPL18A	1.1227	4.21694e-06	1.70931e-05
MORN4	1.12263	0.000925568	0.00235928
CBWD1	1.12243	0.000120123	0.000363479
MLPH	1.12228	0.176479	0.246178
PIGA	1.12136	0.000679118	0.00177662
FDX2	1.12128	4.95866e-07	2.43759e-06
UBE2N	1.12126	1.19818e-06	5.42278e-06
TAF11	1.12077	1.01668e-07	5.76569e-07
UQCRB	1.12053	7.28009e-08	4.24686e-07
VAMP3	1.11962	5.16709e-07	2.52907e-06
TTC9C	1.11688	2.06378e-05	7.31216e-05
CENPM	1.11575	0.000667184	0.00174851
GON7	1.11564	9.12074e-06	3.45888e-05
PUF60	1.11548	6.35732e-07	3.05375e-06
RPL26L1	1.11502	6.86459e-05	0.00021765
ZNF709	1.11467	2.45345e-06	1.04606e-05
CREBRF	1.11447	9.69053e-05	0.000298942
UQCRH	1.11419	7.92184e-05	0.000248653
HDHD3	1.11413	0.0375367	0.0648738
DYNLL1	1.11398	5.95784e-10	5.53932e-09
ACYP2	1.11392	0.000133155	0.000400119
MCRS1	1.11267	4.63711e-06	1.86473e-05
RFC5	1.11252	3.39499e-05	0.000115212
RAD23A	1.11206	1.1725e-06	5.318e-06
KARS	1.11197	5.75385e-07	2.78937e-06
CCDC90B	1.11177	0.000305026	0.000854304
CST2	1.11174	0.0999749	0.152149
SLC25A44	1.11157	0.000105154	0.0003229
MT2A	1.11114	0.0863068	0.13426
CDK5RAP1	1.11063	2.85137e-06	1.19801e-05
RNF157	1.11027	0.0259639	0.0469455
RACK1	1.10985	0.000156774	0.000466234
SLC39A7	1.10958	4.2019e-05	0.000139744
TRMT61B	1.10925	1.3528e-09	1.1529e-08
BAG4	1.10915	1.80118e-07	9.6857e-07
LEPROTL1	1.10818	2.35372e-06	1.00792e-05
PTPRR	1.10806	0.0079869	0.0163629
TMEM256	1.10775	0.00021947	0.000632869
VPS45	1.10757	2.5485e-07	1.33199e-06
PARP3	1.10743	0.000661911	0.00173592
HIST1H3E	1.10702	0.004401	0.0096118
ACTL8	1.10634	0.0908948	0.140185
TMEM251	1.10534	0.00086918	0.00223062
HDAC8	1.10462	6.33077e-07	3.04199e-06
LYPLA1	1.10447	9.05982e-07	4.20904e-06
SYN3	1.10423	0.000253937	0.000721933
ZNF347	1.10415	0.00874262	0.0177359
MRPL45	1.10407	1.36323e-07	7.52025e-07
DPM3	1.10397	0.00206564	0.00486505
NHLRC3	1.10386	0.00246536	0.00570522
TSEN2	1.10371	8.79381e-07	4.09062e-06
THNSL1	1.103	0.000466932	0.00126283
GPANK1	1.1028	1.28055e-05	4.73751e-05
RHOG	1.10262	7.78457e-06	2.99225e-05
CEP41	1.10243	2.00961e-06	8.71461e-06
SERPING1	1.10239	0.000221519	0.000638153
ILK	1.1014	8.98848e-06	3.41136e-05
NRBF2	1.10138	2.51993e-07	1.31846e-06
LRGUK	1.10134	0.0116175	0.0229021
ZSCAN26	1.10083	3.08029e-06	1.28722e-05
ZNF626	1.10043	0.000578429	0.00153531
UFM1	1.09996	7.61155e-07	3.59175e-06
NAT1	1.09986	2.769e-06	1.16707e-05
RNF219	1.09962	1.31914e-07	7.30442e-07
NTMT1	1.09934	3.89945e-05	0.000130711
ZNF799	1.09845	0.000274212	0.000775082
MKS1	1.09818	1.29472e-06	5.80435e-06
PCIF1	1.098	1.04589e-07	5.90466e-07
ALG11	1.09764	4.80424e-09	3.62053e-08
ATPAF2	1.09626	7.59329e-06	2.92405e-05
UBE2V1	1.09574	1.31817e-08	9.09555e-08
TMEM126B	1.0956	4.58157e-05	0.00015109
IPP	1.09517	8.09103e-07	3.79248e-06
HDAC9	1.09493	0.0168055	0.0319193
FOXL2NB	1.09478	0.00387645	0.00858336
ZNF383	1.09457	1.11283e-06	5.0692e-06
NIPAL3	1.09424	0.00453495	0.00987795
C6orf223	1.09413	0.000463528	0.00125408
BTD	1.09372	0.00212993	0.00499654
CALN1	1.09348	0.000113213	0.000344985
RETSAT	1.09313	0.00241632	0.00560142
SUB1	1.09295	2.36617e-05	8.28924e-05
ATG9B	1.09275	1.00323e-08	7.05136e-08
ZP4	1.09236	0.0201588	0.0374571
TSSC4	1.09138	1.45305e-06	6.45713e-06
SYS1	1.09103	1.35487e-05	4.98275e-05
GTF2H5	1.09079	2.41079e-05	8.42604e-05
OASL	1.0906	0.0653705	0.105635
ZNF761	1.08995	0.00105939	0.00266623
CCT8	1.08863	1.10306e-06	5.03406e-06
VPS4B	1.0885	1.55171e-07	8.44916e-07
TMEM261	1.08846	0.0001772	0.00052124
ATP6V1D	1.08815	4.35708e-06	1.76271e-05
ACTR6	1.08806	5.8515e-07	2.83391e-06
COASY	1.08775	8.83875e-05	0.000274855
ELMO2	1.08754	1.00537e-05	3.78246e-05
ZNF571	1.08718	4.40328e-07	2.18944e-06
ARFGAP2	1.08663	3.39348e-07	1.72641e-06
LRRC28	1.08659	3.11725e-07	1.59804e-06
DSTYK	1.08658	0.0384291	0.0661907
RP11-398C13.8	1.08602	0.000172523	0.000508652
PELO	1.0858	0.00293954	0.00668541
SMIM20	1.08523	0.0386479	0.0665131
VMP1	1.0852	4.25164e-05	0.000141191
EXOSC7	1.08492	8.06786e-06	3.08824e-05
RPA2	1.08369	2.77521e-06	1.16935e-05
PLIN3	1.08342	6.75815e-05	0.000214784
RPS28	1.08339	1.23584e-05	4.58625e-05
CYP2J2	1.08331	0.0294211	0.0523794
CNST	1.08249	3.74543e-05	0.000126015
TMEM87A	1.08237	3.40637e-05	0.000115572
LARS	1.08232	1.86983e-05	6.67966e-05
TMEM50B	1.08204	0.000225664	0.000648949
HOXD13	1.08161	0.096075	0.147172
MPP1	1.08142	0.0121699	0.0238902
S100A13	1.08142	0.00572285	0.0121595
EIF2S1	1.08105	1.19288e-06	5.40209e-06
IFT88	1.08093	8.79893e-06	3.34373e-05
RIOK1	1.08074	1.69305e-05	6.09697e-05
ATP5SL	1.08073	2.35377e-07	1.23416e-06
CNFN	1.0802	0.00531449	0.0113789
SARS	1.08011	0.000118121	0.000357938
ABCG5	1.07943	3.65368e-07	1.84984e-06
TTC8	1.07908	0.000402824	0.00110282
MRRF	1.07876	4.6868e-06	1.88163e-05
SFXN3	1.07863	0.000697278	0.00182089
IFT22	1.07798	2.01204e-05	7.15045e-05
COLGALT2	1.07762	0.0172454	0.0326454
ZNF441	1.07681	0.0199427	0.0370884
CCDC102B	1.07663	0.0324245	0.0570842
MUTYH	1.07554	6.77238e-07	3.23413e-06
ABHD14B	1.07505	0.0014519	0.003535
NUBPL	1.07483	4.3916e-07	2.18585e-06
PIAS1	1.07463	6.9928e-10	6.38858e-09
APOBEC3F	1.07461	0.00929341	0.018717
RAD51C	1.07428	1.47344e-05	5.38384e-05
CXorf56	1.07414	2.35482e-05	8.25785e-05
NECAP2	1.07395	1.09185e-06	4.99064e-06
[truncated: 12,719 more rows]
