# Supplementary material for: The Lipogenic Regulator SREBP2 Induces Transferrin in Circulating Melanoma Cells and Suppresses Ferroptosis
Source: Oxford University Press journal article supplement (doi:10.1158/2159-8290.cd-19-1500), 2020-11-17
Supplement: 21598290cd191500-sup-234279_2_supp_6710148_qjjkv9.xlsx [file 21598290cd191500-sup-234279_2_supp_6710148_qjjkv9.xlsx]

## Sheet: SREBP TARGET LISTS
SREBP_TARGET	SREBF1_TARGET	SREBF2_TARGET
AACS	ACACB	ACAT2
ACSS2	ACSL4	MVK
ACLY	FADS1	HES6
DHCR7	FADS2	REG1A
FDPS	ACSL5	REG1B
HMGCS1	GPAM	TFF3
HMGCS2	EHHADH	HMGCR
HMGCR	SCD	MVD
HSD17B7	CSAD	IDI1
IDI1	PDK1	LSS
CYP51	THRSP	CYP51
LDLR	HMGCR	MSMO1
MVD	FASN	NSDHL
NSDHL	MVD	FDFT1
PMVK	ELOVL6	DHCR7
LSS	LSS	HMGCS1
SQLE	DHCR7	HMGCS2
FDFT1	NSDHL
MSMO1	ME1
SC5D
TM7SF2
INSIG1
PCSK9
STARD4
ACACA
CYB5A
FASN
ELOVL6
ME1
SREBF1
ALDOC
TMEM97
RDH11
*Gene list from the Table 1 in Horton et al., 2003	*Genes in 'SREBP_1_TARGET_specific' and 'SREBP_1_TARGET_high'	*Genes in 'SREBP_2_TARGET_specific' and 'SREBP_2_TARGET_high'
Reference: Horton, J. D. et al. Combined analysis of oligonucleotide microarray data from transgenic and knockout mice identifies direct SREBP target genes. Proc Natl Acad Sci U S A 100, 12027-12032, doi:10.1073/pnas.1534923100 (2003).

## Sheet: DEFINITION OF SREBF1_2_TARGETS
SREBF1_TARGET	SREBF2_TARGET	Transgenic SREBF1a			mean		Transgenic SREBF2			mean		SREBP_1_TARGET_specific	SREBP_2_TARGET_specific	SREBP_1_TARGET_high	SREBP_2_TARGET_high
ACACB	ACAT2	HMGCR	37	23	30		HMGCR	52	24	38		ACACB	ACAT2	HMGCR	HMGCR
ACSL4	MVK	FASN	39	20	29.5		MVD	32	23	27.5		ACSL4	MVK	FASN	MVD
FADS1	HES6	MVD	28	24	26		IDI1	20	21	20.5		FADS1	HES6	MVD	IDI1
FADS2	REG1A	ELOVL6	18	16	17		LSS	17	14	15.5		FADS2	REG1A	ELOVL6	LSS
ACSL5	REG1B	LSS	14	9.9	11.95		CYP51	18	11	14.5		ACSL5	REG1B	LSS	CYP51
GPAM	TFF3	DHCR7	18	4.3	11.15		MSMO1	18	11	14.5		GPAM	TFF3	DHCR7	MSMO1
EHHADH	HMGCR	NSDHL	14	8	11		NSDHL	17	11	14		EHHADH		NSDHL	NSDHL
SCD	MVD	ME1	11	9.8	10.4		FDFT1	12	14	13		SCD		ME1	FDFT1
CSAD	IDI1	PMVK	9.8	8	8.9		DHCR7	17	4.9	10.95		CSAD			DHCR7
PDK1	LSS	ACACA	8	8.6	8.3		HMGCS1	12	9.9	10.95		PDK1			HMGCS1
THRSP	CYP51	PCSK9	7	8.6	7.8		HMGCS2	12	9.9	10.95		THRSP			HMGCS2
HMGCR	MSMO1	HMGCS1	7.5	7.5	7.5		PMVK	11	8.6	9.8
FASN	NSDHL	HMGCS2	7.5	7.5	7.5		HSD17B7	11	6.5	8.75
MVD	FDFT1	INSIG1	8	6.5	7.25		FASN	9.2	6.1	7.65
ELOVL6	DHCR7	CYP51	8	6.5	7.25		SQLE	6.9	7.5	7.2
LSS	HMGCS1	FDPS	7.5	6.5	7		FDPS	6.9	6.5	6.7
DHCR7	HMGCS2	FDFT1	5.7	7.5	6.6		PCSK9	5.6	6.5	6.05
NSDHL		IDI1	6	7	6.5		AACS	8.6	3.5	6.05
ME1		RDH11	6.1	6.1	6.1		ALDOC	5.3	6.1	5.7
		ACSS2	7	4.9	5.95		RDH11	5.7	5.3	5.5
		AACS	7.5	3.7	5.6		STARD4	6.1	4.6	5.35
		SQLE	4.3	4.3	4.3		INSIG1	5.7	4.9	5.3
		LDLR	4	4.3	4.15		TM7SF2	5.7	4.9	5.3
		MSMO1	4.3	3.3	3.8		ACSS2	5.7	4	4.85
		ALDOC	4	3.5	3.75		ELOVL6	4.6	4	4.3
		TMEM97	3.7	3.7	3.7		SC5D	3.7	4.6	4.15
		ACLY	3.5	3.7	3.6		TMEM97	3.5	3.7	3.6
		SREBF1	3.3	3.7	3.5		LDLR	3.5	3.5	3.5
		CYB5A	3.7	3	3.35		ME1	3	3	3
		STARD4	3.5	3	3.25		ACACA	2.8	3	2.9
		TM7SF2	3.7	2.3	3		SREBF1	2.6	2.6	2.6
		HSD17B7	3.7	2.3	3		ACLY	2.3	2.8	2.55
		SC5D	2.6	3	2.8		CYB5A	2.5	2.5	2.5

## Sheet: FERROPTOSIS
Ferroptosis
ACSL4
AKR1C1
AKR1C2
AKR1C3
ALOXE3
ALOX5
ALOX12
ALOX12B
ALOX15
ALOX15B
ATP5G3
CARS
CBS
CHAC1
CISD1
CS
DPP4
FANCD2
GCLC
GCLM
GLS2
GPX4
GSS
HMGCR
HSPB1
CRYAB
IREB2
LPCAT3
MT1G
NCOA4
NFE2L2
PTGS2
RPL8
SAT1
SLC7A11
FDFT1
TFRC
TP53
EMC2
TF
Referecne: Stockwell, B. R. et al. Ferroptosis: A Regulated Cell Death Nexus Linking Metabolism, Redox Biology, and Disease. Cell 171, 273-285, doi:10.1016/j.cell.2017.09.021 (2017).
