# Supplementary material for: The Lipogenic Regulator SREBP2 Induces Transferrin in Circulating Melanoma Cells and Suppresses Ferroptosis
Source: Oxford University Press journal article supplement (doi:10.1158/2159-8290.cd-19-1500), 2020-11-17
Supplement: 21598290cd191500-sup-234279_2_supp_6710149_qjjk69.xlsx [file 21598290cd191500-sup-234279_2_supp_6710149_qjjk69.xlsx]

## Sheet: GSVA enrichment scores
	Mel-167_1	Mel-167_2	Mel-167_3	Mel-182-1_1	Mel-182-1_2	Mel-182-2_1	Mel-182-2_2	PEM-22_1	PEM-22_2	PEM-22_3	PEM-78_1	PEM-78_2	PEM-78_3	Mel-167-primary-1	Mel-167-primary-2	PEM-22-met-B	PEM-22-met-LD	PEM-22-met-Liver-LL	PEM-22-met-LL	PEM-22-met-LRL	PEM-22-met-RA	SKCM-BF-A1PU-TP	SKCM-BF-A1PV-TP	SKCM-BF-A1PX-TP	SKCM-BF-A1PZ-TP	SKCM-BF-A1Q0-TP	SKCM-BF-A3DJ-TP	SKCM-BF-A3DL-TP	SKCM-BF-A3DM-TP	SKCM-BF-A3DN-TP	SKCM-BF-A5EO-TP	SKCM-BF-A5EP-TP	SKCM-BF-A5EQ-TP	SKCM-BF-A5ER-TP	SKCM-BF-A5ES-TP	SKCM-BF-A9VF-TP	SKCM-BF-AAOU-TP	SKCM-BF-AAOX-TP	SKCM-BF-AAP1-TP	SKCM-BF-AAP2-TP	SKCM-BF-AAP4-TP	SKCM-BF-AAP6-TP	SKCM-BF-AAP7-TP	SKCM-BF-AAP8-TP	SKCM-D3-A5GT-TP	SKCM-D9-A3Z4-TP	SKCM-D9-A4Z2-TP	SKCM-D9-A4Z3-TP	SKCM-D9-A4Z5-TP
TNFA_SIGNALING_VIA_NFKB	-0.325897	-0.344142	-0.377618	-0.417031	-0.419528	-0.273728	-0.293416	-0.329733	-0.329493	-0.33948	-0.364114	-0.379778	-0.367107	0.402632	0.118139	-0.134878	0.14915	0.0788994	-0.435027	-0.4082	0.145801	-0.330216	-0.0601039	0.328476	-0.173626	0.0336037	0.372946	-0.069034	-0.29248	0.0659459	0.250238	-0.07148	0.385604	-0.0111642	0.218061	-0.208379	0.381099	-0.235405	-0.458923	-0.31437	0.247053	-0.213145	0.311851	-0.174045	-0.238767	-0.0967523	-0.448504	-0.312835	0.375102
HYPOXIA	0.0730428	0.0888978	0.0178867	-0.34179	-0.278635	-0.202834	-0.2055	-0.115716	-0.123138	-0.0629965	-0.101393	-0.1006	-0.118965	0.0636889	0.0171312	-0.152878	0.0582905	0.0869072	-0.35723	-0.363896	-0.0841232	-0.0136152	0.00161443	0.295049	-0.0860733	-0.088984	0.143488	0.1931	0.345637	0.159481	0.20095	0.0996906	0.0112545	0.0543891	0.141098	-0.0316981	0.148357	-0.0508137	-0.415536	-0.154046	0.0599629	-0.0310858	0.107187	-0.220405	-0.264543	-0.113716	-0.270396	-0.315478	0.400305
CHOLESTEROL_HOMEOSTASIS	0.295605	0.275951	0.226953	-0.0456858	0.0772657	0.230187	0.204884	0.179082	0.13222	0.0856663	0.174711	0.14243	0.0952421	-0.284128	-0.185311	0.0661167	-0.17357	0.064535	-0.280298	-0.332341	0.105192	0.406316	-0.0577874	0.307681	0.279342	-0.168111	0.194131	0.293031	0.0621322	0.0140774	0.197117	0.16195	-0.318801	-0.00247883	0.409526	-0.0954086	0.0531375	0.0217045	-0.412545	-0.0012237	0.180392	0.00905607	0.0919721	-0.347454	-0.437895	-0.259902	-0.101031	-0.310763	-0.106469
MITOTIC_SPINDLE	-0.22829	-0.134278	-0.157647	-0.374241	-0.163268	-0.264081	-0.184844	-0.35852	-0.414243	-0.382002	-0.355069	-0.385192	-0.449743	-0.334657	-0.401177	-0.383075	-0.424772	-0.43424	-0.409168	-0.394069	-0.453583	0.0442775	0.189408	-0.270121	-0.0713462	0.274189	-0.126216	-0.25991	0.141017	0.256846	-0.154208	-0.190569	-0.369779	-0.295384	-0.116004	-0.379377	-0.408696	-0.105282	-0.370563	-0.227434	-0.0470831	0.229647	-0.419779	-0.520442	-0.557331	-0.215468	-0.140255	0.0365856	-0.0779826
WNT_BETA_CATENIN_SIGNALING	-0.356174	-0.328102	-0.340918	-0.463692	-0.386634	-0.451925	-0.458896	-0.41445	-0.442377	-0.43895	-0.442908	-0.465383	-0.485261	-0.292186	-0.332566	-0.354887	-0.350339	-0.399628	-0.359122	-0.491536	-0.41862	0.261259	0.023281	0.246713	-0.0108607	-0.241949	-0.30924	0.265653	-0.144487	0.0495211	0.201039	0.337978	0.367675	0.0933122	0.197398	-0.0436807	-0.225547	0.068176	0.0857033	-0.189386	0.354087	0.100502	-0.0522007	-0.197137	-0.28847	0.334745	-0.142323	0.253981	0.41382
TGF_BETA_SIGNALING	-0.45013	-0.446594	-0.472245	-0.51609	-0.499261	-0.45658	-0.428012	-0.476298	-0.479912	-0.461593	-0.433323	-0.473538	-0.495422	-0.128671	-0.00159636	-0.388586	0.0495846	-0.225063	-0.388244	-0.323099	-0.181362	-0.0236862	0.33988	0.0915679	-0.162267	0.194711	0.0436886	-0.0100313	0.0840019	0.467984	0.068074	0.0970509	0.283112	-0.214725	0.106954	-0.334056	-0.0622523	-0.345462	-0.0808541	-0.377296	0.193427	0.210792	-0.156341	-0.288391	-0.437231	-0.275678	-0.340801	-0.225107	0.245801
IL6_JAK_STAT3_SIGNALING	-0.333205	-0.323092	-0.326335	-0.299794	-0.320751	-0.304109	-0.301655	-0.158282	-0.240361	-0.210954	-0.342681	-0.226675	-0.258616	0.301266	0.0852601	-0.282207	0.111272	0.021076	-0.398891	-0.401239	0.119584	-0.372411	-0.364525	0.470469	-0.225129	-0.0220291	0.374726	-0.0485303	-0.105543	-0.0869695	0.251955	-0.412111	0.374255	-0.0685654	0.167106	-0.44182	0.368771	-0.350317	-0.49199	-0.335333	0.224626	-0.348272	0.424092	-0.21014	-0.317679	0.243493	-0.333219	-0.278244	0.304929
DNA_REPAIR	0.438395	0.425315	0.402242	0.137682	0.278126	0.335252	0.374516	0.269453	0.229404	0.257434	0.265568	0.281424	0.142633	-0.195409	-0.0601764	0.182091	-0.321878	-0.0224217	-0.544726	-0.519601	0.0183407	0.240674	0.297248	-0.278326	0.373827	0.227928	-0.1686	0.180682	-0.025813	-0.0143892	0.252508	0.151793	-0.328962	-0.0885118	0.172521	0.15726	-0.330307	0.20216	0.164454	0.187418	0.218644	0.331671	-0.271548	-0.360698	-0.499433	-0.236904	0.160426	-0.158405	-0.27033
G2M_CHECKPOINT	0.158808	0.180244	0.193311	0.112899	0.290313	0.154379	0.213209	-0.0425346	-0.129249	-0.0942146	0.170678	0.0551669	-0.0323895	-0.333151	-0.462298	-0.381948	-0.512156	-0.408808	-0.437211	-0.349337	-0.4601	-0.218184	0.389551	-0.228081	-0.0549654	0.382503	-0.335322	-0.298413	-0.00458194	-0.14045	-0.144573	0.101078	-0.409637	-0.144413	-0.306082	-0.225802	-0.447714	0.03307	-0.150579	-0.230008	0.2129	0.334246	-0.500291	-0.579374	-0.515173	-0.281347	-0.0303141	0.0174039	-0.464206
APOPTOSIS	-0.120669	-0.091103	-0.156269	-0.204338	-0.12984	-0.0377983	-0.075081	-0.0380023	-0.0851826	-0.0460039	-0.162929	-0.214544	-0.290687	-0.0504197	-0.0269569	-0.139745	-0.0256574	0.0362433	-0.405907	-0.394145	0.0686759	-0.0468115	0.0247136	0.276312	0.0599108	-0.0714905	0.237385	-0.0318554	-0.107953	0.0393084	0.206567	-0.0593554	0.240549	-0.0349972	0.232866	-0.101145	0.0966294	-0.135346	-0.360771	-0.162349	0.245392	-0.000625616	0.259833	-0.253542	-0.299119	-0.0485163	-0.253649	-0.24662	0.216304
NOTCH_SIGNALING	-0.230253	-0.167886	-0.265004	-0.353896	-0.334334	-0.183798	-0.217403	-0.298236	-0.321072	-0.268259	-0.311702	-0.35622	-0.323172	0.0459704	-0.196476	-0.273462	-0.117884	-0.164409	-0.208313	-0.306782	-0.215695	0.203911	-0.11221	0.290774	-0.0719356	-0.201384	-0.0662487	0.385332	0.137814	0.411365	0.318878	0.346898	0.35617	0.229799	0.249575	0.0692059	-0.150287	-0.0529632	0.176681	0.174778	0.129105	0.00494864	0.141894	-0.271125	-0.304972	-0.0670203	0.109901	-0.112498	0.329987
ADIPOGENESIS	0.27546	0.263586	0.193453	0.108028	0.286803	0.385968	0.420228	0.166378	0.102948	0.066076	0.128378	0.173063	0.0538583	-0.15393	-0.0164808	0.0795135	-0.0638281	0.218419	-0.370729	-0.391147	0.145509	-0.00996937	0.0839966	-0.0119529	0.183624	-0.216945	0.0811645	0.163281	0.284588	0.16031	-0.0156416	0.0765285	-0.204107	0.0341709	0.21533	0.0173484	-0.278605	0.251631	-0.228238	0.10522	-0.0201015	0.150283	-0.0849173	-0.0613295	-0.433678	-0.114643	-0.106351	-0.073242	-0.0481458
ESTROGEN_RESPONSE_EARLY	-0.27146	-0.316387	-0.310912	-0.311395	-0.275852	-0.198378	-0.216499	-0.294248	-0.34418	-0.291494	-0.233468	-0.2433	-0.308654	0.0619143	0.0850654	-0.327004	0.0479689	-0.0800238	0.061117	0.0604322	-0.0942273	0.264593	-0.17506	0.421396	0.0946389	-0.189836	0.294273	0.171135	0.0473969	0.127394	0.24061	0.0809151	0.0127766	0.173775	0.0931829	0.142212	0.147529	0.0426318	-0.258323	0.0641154	0.181838	-0.189613	0.242104	-0.0854418	-0.285265	-0.104687	-0.128126	-0.106187	0.247792
ESTROGEN_RESPONSE_LATE	-0.184815	-0.184647	-0.175715	-0.158941	-0.102056	0.0169418	-0.0420281	-0.230889	-0.254351	-0.220782	-0.0801156	-0.062894	-0.101572	0.0842412	0.0468223	-0.195406	0.151232	0.12809	0.182116	0.201582	0.159235	0.263225	-0.184722	0.454265	0.0920707	-0.0767887	0.217174	0.140565	-0.0481759	-0.0370317	0.267353	0.105461	0.0703319	0.186297	0.0717359	0.198372	0.325313	0.197236	-0.238726	0.0284079	0.0757942	-0.267564	0.335434	-0.00686237	-0.163948	-0.182946	-0.277834	-0.12726	0.0208143
ANDROGEN_RESPONSE	0.153671	0.140008	0.0748453	0.0555581	0.166307	0.0866497	0.179276	0.0702609	0.10103	0.108178	0.123331	0.0786883	-0.00773631	0.0818267	0.171709	-0.132956	0.041457	0.0170646	-0.288954	-0.243051	-0.00308414	0.00419299	-0.0158822	-0.069826	-0.0342078	0.00302448	0.276839	-0.318912	0.188194	0.275633	-0.372141	0.00543549	-0.146958	-0.454541	-0.0239284	-0.307314	-0.140401	-0.0992012	-0.280173	-0.214723	-0.103849	-0.0555581	-0.331594	-0.331174	-0.465588	-0.088482	-0.0801326	0.0154929	0.0808927
MYOGENESIS	-0.292763	-0.289831	-0.258359	-0.270741	-0.245182	-0.239896	-0.203783	-0.281155	-0.275567	-0.30352	-0.225658	-0.270411	-0.297308	-0.0868726	0.0424206	-0.0820029	0.224728	-0.0338014	0.0958569	0.0433922	0.0156301	0.300506	-0.19588	0.231836	-0.157922	-0.119881	-0.0444448	0.319428	0.00305685	0.12339	0.306236	0.0530607	0.179399	0.239068	0.202376	0.0852633	0.274038	0.220799	-0.30924	-0.128255	-0.0135167	-0.125284	0.357753	0.114916	0.099175	0.0579928	-0.065213	-0.0462412	0.298891
PROTEIN_SECRETION	0.39373	0.413586	0.437546	0.042481	0.274934	0.126347	0.202091	0.465159	0.419444	0.467728	0.352517	0.245768	0.117883	-0.212268	-0.254505	0.0148461	-0.279184	0.039216	-0.427682	-0.42028	0.0191265	-0.158978	0.248332	-0.461996	0.0908574	0.291242	0.365982	-0.195068	0.30443	0.504215	-0.47558	-0.125706	-0.280436	-0.510628	0.053196	-0.356852	-0.390815	-0.00870314	0.0424749	-0.380599	0.0543706	0.368475	-0.512405	-0.357821	-0.508478	-0.212198	0.118994	-0.157758	-0.034992
INTERFERON_ALPHA_RESPONSE	-0.241063	-0.149915	-0.189378	-0.135817	-0.187343	0.150391	0.110402	0.269361	0.241991	0.334378	-0.190646	-0.262275	-0.309208	0.296631	0.209588	-0.278319	0.0344224	-0.115219	-0.572127	-0.552847	0.121132	-0.443331	-0.458395	0.530852	0.34255	0.148195	0.469418	-0.0135412	0.373124	-0.171826	0.133505	-0.394832	0.00651302	-0.309764	0.18853	-0.593984	0.0643624	-0.430739	-0.560126	0.280797	0.451926	-0.48138	0.5357	-0.350424	-0.532231	0.512341	-0.41818	-0.560716	0.3135
INTERFERON_GAMMA_RESPONSE	-0.31165	-0.314451	-0.296226	-0.174139	-0.261093	-0.0472517	-0.097342	0.0684114	0.0693162	0.0856473	-0.176026	-0.200567	-0.24963	0.335201	0.197273	-0.276883	0.194451	-0.0383961	-0.465046	-0.475564	0.204668	-0.490959	-0.487163	0.510721	0.115148	0.0783804	0.407698	-0.162145	-0.0255995	-0.212552	0.0407529	-0.437589	0.236913	-0.324686	0.221694	-0.529554	0.259172	-0.381283	-0.542071	0.114723	0.424447	-0.416215	0.485675	-0.342068	-0.475299	0.336752	-0.437653	-0.415778	0.109123
APICAL_JUNCTION	-0.319798	-0.327055	-0.338899	-0.426597	-0.397824	-0.4248	-0.387997	-0.352738	-0.366533	-0.343835	-0.318333	-0.347007	-0.38221	-0.161736	0.00416822	-0.296804	-0.0731677	-0.32743	-0.0646545	-0.0901471	-0.262306	0.271074	0.0958462	0.389873	-0.0438478	0.0476781	0.162886	0.167075	-0.0681117	0.120832	0.311436	0.102621	0.210645	0.209958	0.263899	-0.0240964	0.130892	0.0488092	-0.231809	-0.0752865	-0.070337	-0.135012	0.33653	-0.256064	-0.153852	-0.189923	-0.147783	-0.255911	0.238279
APICAL_SURFACE	-0.370104	-0.361834	-0.437028	-0.22276	-0.269165	-0.367543	-0.291689	-0.427891	-0.383072	-0.329912	-0.32108	-0.40458	-0.250008	0.173929	-0.121924	-0.42079	-0.240704	-0.310737	0.150214	0.17241	-0.222831	0.339797	-0.335072	0.355522	-0.211843	-0.0626963	0.077383	0.248901	-0.279827	0.0921515	0.251442	0.00157989	0.329203	0.407973	0.188262	0.0864437	0.35156	0.00482601	-0.241682	0.0115981	-0.0646504	-0.187439	0.220369	-0.229172	-0.10174	-0.154466	-0.287985	-0.394743	0.265582
HEDGEHOG_SIGNALING	-0.427569	-0.43082	-0.479702	-0.405185	-0.304749	-0.424855	-0.426731	-0.466794	-0.49152	-0.424979	-0.266784	-0.416007	-0.396423	-0.108894	-0.148016	-0.339895	-0.250394	-0.157178	0.122503	0.0936633	-0.333287	0.409924	0.229619	0.0233541	-0.100589	0.201152	-0.187499	0.208801	0.141742	0.27623	0.111364	0.117186	0.396062	0.367201	0.149222	-0.0882147	0.242573	-0.121992	-0.236879	-0.287589	0.0502702	-0.241584	-0.0422306	-0.0783484	0.0673172	-0.00430156	-0.372671	-0.0693012	0.510467
COMPLEMENT	-0.203392	-0.148474	-0.158346	-0.18557	-0.261955	-0.223142	-0.24414	-0.0513191	-0.0735528	0.0137299	-0.169865	-0.239047	-0.260379	0.223063	0.167653	-0.173389	0.132227	0.188738	-0.344453	-0.328704	0.0912685	-0.200683	-0.303093	0.431155	-0.103369	-0.0417908	0.30242	0.0446946	-0.158955	-0.00219392	0.121822	-0.120492	0.20696	-0.127952	0.113276	-0.252756	0.116502	-0.179703	-0.431366	-0.242157	0.115553	-0.224535	0.328371	-0.156886	-0.317417	-0.130098	-0.204184	-0.237823	0.0106017
UNFOLDED_PROTEIN_RESPONSE	0.281972	0.273331	0.224796	-0.139623	0.0487149	0.00819138	0.0436106	0.203201	0.103016	0.158985	0.114943	0.024074	-0.0905039	-0.426762	-0.456345	0.0253776	-0.469055	-0.1838	-0.585382	-0.576876	-0.214309	-0.148765	0.417024	-0.395492	0.134302	0.236377	-0.109509	0.174259	0.203849	0.0527593	-0.110824	0.299742	-0.309243	-0.145521	-0.0274229	-0.0751458	-0.404128	-0.0900031	0.283179	-0.322627	0.159555	0.257524	-0.369243	-0.308785	-0.496646	-0.189722	-0.304608	0.0547787	-0.112863
PI3K_AKT_MTOR_SIGNALING	-0.0373848	-0.0594017	-0.0518325	-0.324102	-0.0549171	-0.17257	-0.121667	-0.100263	-0.153016	-0.0717587	-0.0787528	-0.155214	-0.296141	-0.261503	-0.222402	-0.148293	-0.308647	-0.206783	-0.426042	-0.306226	-0.256367	-0.120903	0.00958019	-0.0245211	0.179597	0.157726	0.179414	-0.0354148	0.0892252	0.00679989	-0.0557108	-0.210583	-0.195542	-0.135075	0.281811	-0.089639	-0.395667	0.00750073	-0.275163	0.00763259	0.239865	0.125917	-0.122508	-0.403175	-0.506141	0.00689333	-0.194859	-0.185182	0.00714632
MTORC1_SIGNALING	0.46785	0.472972	0.435976	0.212494	0.363316	0.395514	0.399226	0.375475	0.356155	0.365999	0.4035	0.324464	0.236174	-0.302115	-0.120848	-0.0119217	-0.407124	-0.103219	-0.501047	-0.461608	-0.11472	-0.133546	-0.0709374	-0.0163141	0.0846835	-0.040245	0.0720275	0.014353	0.259099	0.0130105	-0.0980676	0.287408	-0.40575	-0.127648	0.0846575	-0.186675	-0.295166	-0.0783014	-0.246603	-0.375585	0.160709	0.1283	-0.287686	-0.416851	-0.586062	-0.358294	-0.255784	-0.18963	-0.336337
E2F_TARGETS	0.418537	0.455855	0.435308	0.384914	0.513064	0.412726	0.442112	0.133438	0.0871156	0.0945822	0.410723	0.375409	0.241923	-0.262132	-0.445849	-0.279707	-0.533039	-0.416919	-0.486155	-0.451003	-0.401196	-0.180423	0.451748	-0.264913	-0.127597	0.439438	-0.366517	-0.398225	-0.00971236	-0.30223	-0.163309	0.0486955	-0.432351	-0.0985016	-0.258849	-0.0583008	-0.454947	0.12661	-0.20731	-0.200066	0.231583	0.358455	-0.493888	-0.596973	-0.495716	-0.326077	0.121391	0.119859	-0.548135
MYC_TARGETS_V1	0.353359	0.391757	0.338771	0.391284	0.497615	0.469174	0.492071	0.349316	0.310336	0.313102	0.35118	0.379074	0.271338	-0.324484	-0.303649	0.243774	-0.408827	-0.0547694	-0.57712	-0.59155	-0.0246305	-0.167978	0.444352	-0.489006	0.191371	0.319062	-0.462475	-0.131132	0.0508957	-0.217748	-0.304507	0.282372	-0.471498	-0.26994	-0.28528	-0.0701363	-0.431013	0.169867	0.034237	0.0700192	0.191782	0.0222332	-0.499967	-0.363922	-0.518415	-0.297391	-0.282615	0.23974	-0.434745
MYC_TARGETS_V2	0.434984	0.478234	0.369406	0.275846	0.570198	0.478753	0.556872	0.356315	0.270116	0.230005	0.407196	0.394995	0.161634	-0.4619	-0.48062	-0.0832706	-0.608324	-0.362222	-0.636154	-0.625159	-0.377399	0.0807091	0.567642	-0.409852	0.389158	0.0674107	-0.556345	0.312342	0.226922	-0.515753	0.122777	0.296356	-0.403351	0.545422	-0.108081	0.430165	-0.597809	0.36961	0.319203	0.108923	0.239696	0.222082	-0.438084	-0.465519	-0.518529	0.0168071	-0.281968	0.517892	-0.371294
EPITHELIAL_MESENCHYMAL_TRANSITION	-0.322859	-0.316491	-0.32883	-0.326766	-0.372528	-0.273579	-0.288611	-0.270744	-0.310072	-0.242816	-0.336455	-0.389842	-0.343098	0.200472	0.196349	-0.334544	0.279607	-0.0878451	-0.325019	-0.416462	-0.0322503	0.253942	0.0885396	0.398465	-0.382697	0.0583557	0.14254	0.344691	0.0152041	0.353579	0.272852	0.278941	0.444733	0.200791	0.350478	-0.315087	0.44353	-0.310306	-0.404118	-0.420777	-0.0685673	-0.0753144	0.431504	-0.316654	-0.250406	-0.109581	-0.0699562	-0.271155	0.326878
INFLAMMATORY_RESPONSE	-0.338078	-0.307953	-0.333082	-0.213732	-0.341923	-0.249863	-0.288486	-0.182316	-0.156717	-0.120883	-0.177064	-0.199595	-0.136488	0.406367	0.124852	-0.190674	0.224912	0.109304	-0.251731	-0.264269	0.273263	-0.45062	-0.415539	0.485447	-0.322529	0.105646	0.384488	-0.153375	-0.278838	-0.101347	0.238056	-0.326957	0.411027	-0.0635173	0.198484	-0.350878	0.398898	-0.320282	-0.462654	-0.213014	0.154152	-0.294765	0.429288	-0.219244	-0.254363	0.11091	-0.322218	-0.159084	0.189391
XENOBIOTIC_METABOLISM	0.0725775	0.0771031	0.122092	-0.00939093	0.0857211	0.149986	0.148855	0.196172	0.161519	0.154921	0.182909	0.175037	0.0936858	-0.0680571	-0.0583549	-0.00889877	0.0662402	0.423279	-0.14064	-0.147644	0.195722	0.0391389	-0.16633	0.357081	-0.0316909	-0.226285	0.112707	0.18462	-0.0419718	0.0120129	0.176454	0.0618635	0.0224681	0.219612	0.15439	0.11073	0.0564222	0.211194	-0.106258	-0.0838931	0.0756159	-0.149852	0.312855	0.190916	-0.261561	-0.184674	0.0307554	-0.268277	0.112871
FATTY_ACID_METABOLISM	0.332992	0.312958	0.308977	0.154555	0.250283	0.32672	0.318218	0.303618	0.273642	0.277443	0.335121	0.33768	0.274215	-0.14941	-0.207826	0.165104	-0.136078	0.363584	-0.353529	-0.388164	0.232087	0.186374	0.0186096	0.0348541	0.290249	-0.315978	-0.0481311	0.140464	0.173728	0.0833478	-0.177998	0.0131943	-0.228853	-0.15533	0.14859	-0.0443188	-0.132296	0.294404	-0.0233369	0.131716	0.101199	0.0590551	-0.095096	0.0318972	-0.425926	-0.106531	-0.0206532	-0.243518	-0.194973
OXIDATIVE_PHOSPHORYLATION	0.633838	0.611174	0.578911	0.485579	0.570957	0.658273	0.655097	0.532601	0.50616	0.423515	0.539858	0.602346	0.49268	0.202814	0.222176	0.542403	0.0292855	0.494129	-0.424088	-0.444635	0.484932	0.0216224	0.218397	-0.294239	0.532687	-0.139984	-0.295572	0.381469	0.450655	0.0970054	-0.21889	0.0224556	-0.450845	-0.125611	0.279527	0.213499	-0.220567	0.435053	0.249583	0.454762	0.374262	0.213738	-0.043324	0.234315	-0.514375	-0.399662	-0.311526	0.098746	-0.48338
GLYCOLYSIS	0.302312	0.294042	0.284571	-0.0880035	0.0206055	0.0986971	0.113236	0.0303815	-0.00574462	0.0622741	0.0682246	0.0667324	0.0262722	-0.15709	-0.134435	-0.114528	-0.329625	-0.0596251	-0.328276	-0.299811	-0.189594	-0.00447198	0.0217474	0.12802	0.0663844	-0.0173218	-0.00768631	0.325938	0.308281	0.0652035	0.181369	0.304016	-0.132632	0.0722794	0.175281	0.132022	-0.0471819	0.0103096	-0.06604	-0.23689	0.0122893	0.0668924	-0.0780138	-0.235898	-0.352486	-0.193562	-0.232745	-0.34271	-0.0269047
REACTIVE_OXIGEN_SPECIES_PATHWAY	0.131044	0.116231	0.0200126	0.0872251	0.085121	0.335027	0.286204	0.0432627	0.0173637	0.034657	0.0945777	0.00109826	-0.0317146	-0.0800352	0.320093	0.135581	0.115385	0.214541	-0.46831	-0.471556	0.246771	-0.00553783	-0.199198	0.286671	0.380743	-0.140372	-0.0869068	0.446403	-0.225747	-0.146748	0.317303	0.0706057	-0.0102046	0.0760913	0.413669	0.211283	-0.147833	0.2199	-0.394199	0.26903	0.449424	0.0159939	0.332778	-0.265041	-0.56272	-0.279651	-0.361857	-0.2173	-0.252233
P53_PATHWAY	-0.161161	-0.1695	-0.184631	-0.249491	-0.148289	-0.0374466	-0.03978	-0.156795	-0.205896	-0.168645	-0.141139	-0.196775	-0.261461	0.0218941	0.0191782	0.0640258	-0.0711728	0.0763905	-0.37196	-0.361286	0.0689989	0.0567158	0.066848	0.357736	-0.028086	-0.112342	0.210378	-0.029445	-0.101804	0.130846	0.37909	0.0744724	0.0862394	0.20801	0.143387	0.139315	0.100364	0.0799075	-0.150199	-0.0321981	0.259839	0.0868464	0.294672	-0.169734	-0.274095	-0.0706638	-0.0810616	-0.036466	0.360181
UV_RESPONSE_UP	-0.114898	-0.147584	-0.161922	-0.243955	-0.176637	-0.175006	-0.105205	-0.141143	-0.174144	-0.120684	-0.0920557	-0.126082	-0.167178	-0.161094	0.0260746	-0.203333	-0.298718	-0.123905	-0.345434	-0.38238	-0.201694	0.0926159	-0.00815304	0.232674	0.0820699	0.0425042	0.0491157	0.230912	0.053198	-0.0266186	0.131469	0.106517	-0.0211252	0.169604	0.2273	0.136353	-0.0621708	0.0580284	-0.12767	-0.201845	0.205361	-0.050892	0.0862469	-0.023483	-0.289773	-0.0875313	-0.247811	-0.141744	0.0628228
UV_RESPONSE_DN	-0.35541	-0.341116	-0.35495	-0.389746	-0.344672	-0.322372	-0.30472	-0.306757	-0.31809	-0.208778	-0.363602	-0.409668	-0.430427	0.131018	0.117987	-0.278695	0.167876	-0.0578512	-0.162998	-0.187225	-0.141632	0.0163138	0.0823767	0.0375017	-0.228926	0.109733	0.15264	-0.148435	0.140031	0.48407	-0.324268	-0.154267	0.194489	-0.250723	-0.0956462	-0.3614	-0.162595	-0.377641	-0.264773	-0.224891	-0.217686	-0.105044	-0.254634	-0.335838	-0.279559	0.0135469	-0.00380311	-0.205076	0.387924
ANGIOGENESIS	-0.317702	-0.335594	-0.359307	-0.242203	-0.318225	-0.350898	-0.362176	-0.362216	-0.342488	-0.279438	-0.264292	-0.389193	-0.330925	0.275295	0.274701	-0.111144	0.323903	0.286933	-0.337517	-0.38761	0.260757	0.054534	-0.0959319	0.436551	-0.375564	-0.222649	0.519098	0.292745	-0.149668	0.469337	0.322958	0.396577	0.189554	0.315494	-0.0699093	-0.197385	0.385569	-0.0983735	-0.228751	-0.394933	-0.165163	-0.0912216	0.45311	-0.0325687	0.000523023	0.175223	0.277278	-0.0282446	0.348395
HEME_METABOLISM	-0.0317141	-0.0185981	-0.0550682	-0.305051	-0.184174	-0.141334	-0.0777826	-0.0709078	-0.088184	-0.0760365	-0.0784997	-0.189252	-0.292999	-0.146638	-0.179524	-0.144169	-0.0881497	0.0284669	-0.318306	-0.325667	-0.0992648	0.0817673	0.0127074	0.0429543	0.185876	-0.0633737	0.0356152	0.0402591	0.224015	0.200859	-0.0222352	-0.0336919	-0.027441	-0.0686429	0.179841	-0.0235576	-0.136115	-0.015564	-0.204674	0.100257	0.181859	0.0184498	-0.135514	-0.186077	-0.356534	-0.165935	-0.100183	-0.148873	0.108194
COAGULATION	-0.130174	-0.0688544	-0.0683218	-0.171604	-0.265492	-0.137491	-0.237367	-0.0721679	0.00127268	-0.0420104	-0.177788	-0.208502	-0.206072	0.271018	0.369975	-0.108416	0.228672	0.450484	-0.295361	-0.285496	0.194058	0.228344	-0.179932	0.443436	-0.0368576	-0.049491	0.149934	0.326751	-0.227242	0.206836	0.377515	0.124089	0.397361	0.125858	0.325647	0.0931174	0.439835	0.0784584	-0.205154	-0.0906533	0.0738914	-0.161244	0.48182	0.154968	0.0236216	0.131879	0.193803	-0.254451	0.223
IL2_STAT5_SIGNALING	-0.291562	-0.302879	-0.305442	-0.23292	-0.197172	-0.227321	-0.218819	-0.289663	-0.327474	-0.267858	-0.338511	-0.351088	-0.377062	0.141473	0.0913114	-0.286369	0.063396	-0.0877921	-0.327696	-0.280581	0.0253406	-0.293467	-0.251376	0.414528	-0.169619	-0.15508	0.160635	0.0718862	-0.203767	-0.10372	0.120448	-0.0100366	0.252128	-0.0490648	0.201712	-0.208486	0.12511	-0.247362	-0.497252	-0.152847	0.149827	-0.201474	0.266933	-0.225763	-0.313017	0.112942	-0.319082	-0.0943411	-0.0405334
BILE_ACID_METABOLISM	0.136785	0.0554319	0.174299	-0.00385736	-0.0215691	0.0824195	0.115872	0.0396147	0.0742687	0.0631978	-0.0405434	0.0345847	0.0184743	0.187591	0.0276284	-0.0555946	0.118941	0.391806	-0.0477425	-0.0405469	0.155846	0.0899385	-0.32359	0.126554	-0.0141043	-0.166624	0.188643	-0.00889985	-0.0642938	0.26673	-0.0646286	-0.00762054	-0.00788712	-0.043994	0.107434	-0.0931937	0.0588295	0.176111	-0.0756413	0.157019	-0.0394137	-0.127775	0.0308679	0.226884	-0.197928	-0.0931506	0.186473	-0.168309	-0.0148898
PEROXISOME	0.236428	0.181092	0.203483	0.104522	0.15911	0.269362	0.319875	0.237508	0.186059	0.287097	0.295124	0.238057	0.194483	-0.0690681	-0.0642389	0.0108007	-0.211585	0.208958	-0.210304	-0.264085	-0.0548994	0.175173	0.0614933	-0.00155136	0.207123	-0.0969328	0.073882	0.0150268	0.217941	0.100711	-0.0130969	0.174927	-0.243721	-0.139639	0.0891465	-0.0217107	-0.153088	0.137278	-0.14916	0.17496	0.0566314	0.0922372	-0.115659	0.00694691	-0.299337	-0.00644301	-0.0581108	-0.181738	-0.122166
ALLOGRAFT_REJECTION	-0.389468	-0.360684	-0.374438	-0.150322	-0.342547	-0.243003	-0.309547	-0.205529	-0.207808	-0.215826	-0.231762	-0.266972	-0.244455	0.306488	0.208162	-0.302373	0.0825769	-0.0279484	-0.320733	-0.331704	0.17896	-0.558269	-0.479641	0.489236	-0.322226	0.163222	0.189619	-0.247578	-0.441136	-0.401027	0.103215	-0.42251	0.419239	-0.134399	0.217365	-0.407885	0.213497	-0.288867	-0.506334	-0.224027	0.33255	-0.465853	0.423603	-0.235735	-0.225978	0.15688	-0.418776	-0.0126951	-0.179384
SPERMATOGENESIS	0.240979	0.212139	0.206534	0.261308	0.205311	0.21278	0.191565	0.116319	0.103287	0.151454	0.254099	0.234882	0.254049	0.173271	0.129024	0.0991282	-0.130937	0.0776353	0.319677	0.318315	-0.0257491	-0.0668524	-0.114401	-0.0130462	0.0912853	0.226331	-0.11806	-0.110974	0.0261015	0.0097594	-0.0908446	0.122368	-0.0863494	-0.120957	-0.14119	-0.123622	0.0981217	0.0410167	0.00514645	-0.0580633	-0.0499973	-0.0282805	-0.132796	-0.192427	0.214627	-0.0820656	-0.188697	0.0490561	-0.207704
KRAS_SIGNALING_UP	-0.272135	-0.245641	-0.255936	-0.0754062	-0.203293	-0.129586	-0.189821	-0.171922	-0.160458	-0.0836796	-0.166175	-0.172255	-0.16628	0.380782	0.215975	-0.159873	0.348871	0.238	0.00738427	0.038808	0.313304	-0.302995	-0.439861	0.461015	-0.359145	-0.119791	0.26879	-0.0733356	-0.160488	0.123236	0.0901025	-0.156133	0.298334	-0.209716	-0.062001	-0.324518	0.325032	-0.255907	-0.343309	-0.284952	-0.0160646	-0.292578	0.32337	-0.0555346	-0.0908652	0.0595362	-0.0686456	-0.0671406	0.163343
KRAS_SIGNALING_DN	-0.146817	-0.15172	-0.222607	0.100087	-0.142446	0.0020229	-0.115157	-0.061615	-0.100777	-0.062525	0.0265486	-0.0186416	0.105363	0.223307	0.188879	-0.043784	0.190253	0.0740396	0.412356	0.373037	-0.0909917	0.0826121	-0.355301	0.420467	-0.0610176	-0.153749	0.163016	0.217518	-0.184485	-0.215285	0.33308	0.0779992	0.304932	0.325871	0.0904764	0.303279	0.319938	0.201655	-0.0968988	0.122673	-0.000897616	-0.201366	0.404005	0.205819	0.412231	0.0259724	-0.106086	-0.101603	0.011003
PANCREAS_BETA_CELLS	0.140622	0.224833	0.177491	0.446648	0.253057	0.381432	0.400323	0.286916	0.32015	0.288467	0.3171	0.25088	0.356425	0.489294	0.413302	0.21949	0.428772	0.364918	0.34455	0.259892	0.304225	0.177753	-0.291576	0.335246	0.149802	-0.0154867	-0.192485	0.280247	0.0617985	-0.0840916	-0.0385692	0.0221835	0.162636	-0.0133391	0.179917	0.233647	0.314046	0.142301	0.182727	0.108601	0.177651	-0.182006	0.382358	0.141843	0.389295	0.310911	-0.21983	0.095655	0.0594047
FERROPTOSIS	0.248142	0.295828	0.34677	0.423892	0.376225	0.342662	0.364852	0.363788	0.374626	0.374504	0.43703	0.310664	0.234478	-0.00285747	-0.154399	-0.0184762	0.0379055	0.147203	-0.231204	-0.282963	-0.0350201	-0.150745	-0.126881	0.241275	-0.0950991	-0.231624	0.314558	-0.180861	-0.0800274	-0.20096	-0.070064	-0.258493	-0.00808332	0.0906844	0.00123561	0.0114595	-0.0564276	0.13054	-0.206861	0.152033	-0.212578	-0.0543741	-0.076805	0.081446	-0.238551	-0.131361	-0.155212	0.0670481	-0.0657289
SREBP_TARGET	0.718752	0.678888	0.635555	0.342611	0.45982	0.474288	0.453639	0.444765	0.264397	0.343106	0.622761	0.617037	0.530258	-0.362256	-0.259755	0.0518866	-0.307754	-0.133418	0.0473854	-0.191406	-0.0443824	0.530328	-0.180385	0.371833	0.461869	-0.418405	0.138885	-0.0074335	0.489871	-0.189775	-0.254155	-0.126353	-0.647805	-0.308061	0.206797	-0.193104	-0.239375	0.100533	-0.382023	-0.22228	0.0168457	0.0679167	-0.320615	-0.435284	-0.586091	-0.414325	0.367272	-0.556997	-0.456035
SREBP_1_TARGET	0.547683	0.574812	0.533985	0.17032	0.554368	0.261337	0.378532	0.0686836	0.00512147	-0.0783821	0.380658	0.362609	0.161491	-0.18795	0.0212714	-0.431857	-0.354857	-0.240628	-0.26343	-0.26029	-0.315155	0.190898	-0.173497	0.0347702	-0.179463	-0.404048	0.106277	-0.270319	0.217305	-0.4128	-0.3233	-0.401604	-0.639149	-0.46712	0.0200555	-0.458597	-0.0842417	0.0968174	-0.263428	-0.10069	-0.26474	-0.0914353	-0.362408	0.00294723	-0.354998	-0.145976	0.349619	-0.449173	-0.348513
SREBP_2_TARGET	0.762932	0.721722	0.657922	0.456363	0.670346	0.610279	0.692411	0.210933	0.218155	0.103295	0.518084	0.60252	0.534601	-0.390364	-0.125801	0.142072	-0.153483	-0.097274	-0.000140173	0.00772631	0.0790818	0.639888	0.0825234	0.451994	0.31206	-0.300675	-0.230181	0.257561	0.295775	-0.443822	-0.171926	-0.304909	-0.496064	-0.140635	0.41939	0.0247551	0.457089	0.18138	-0.351509	0.00445239	0.34262	-0.0244575	-0.152166	-0.357753	-0.390089	-0.570555	0.412875	-0.71154	-0.497453
IRON_ION_HOMEOSTASIS	0.113909	0.115162	0.137897	-0.0135863	0.0325869	0.0403912	0.0601837	0.154524	0.0784117	0.138986	0.128154	0.068513	0.116479	0.0339024	0.00235955	-0.0720941	0.105189	0.207427	-0.28706	-0.332421	0.10442	-0.0739869	-0.0446848	0.0245194	0.0840179	-0.121389	0.237352	0.0446875	-0.0311514	0.15536	-0.144232	0.0019214	-0.0923341	-0.0338784	0.155297	0.0748016	0.125327	0.0183877	-0.130061	-0.027551	0.312693	-0.040236	-0.078374	-0.0301403	-0.367008	-0.183974	-0.201394	-0.261724	-0.0536733
[truncated: 487 more columns]

## Sheet: CTC_tumor-derived CCLE line 
Set	group1	group2	n1	n2	statistic	df	P value	FDR-adjusted P value	Significance level of FDR-adjusted P value
SREBP_TARGET	CTC lines	CCLE lines (Primary)	13	12	3.0497	17.6337	0.007	0.008	**
SREBP_TARGET	CTC lines	CCLE lines (Metastasis)	13	29	3.03918	38.4017	0.004	0.008	**
FERROPTOSIS	CTC lines	CCLE lines (Primary)	13	12	7.5169	16.5391	1e-06	1e-06	****
FERROPTOSIS	CTC lines	CCLE lines (Metastasis)	13	29	9.06895	39.9964	2.99e-11	5.98e-11	****
IRON_ION_HOMEOSTASIS	CTC lines	CCLE lines (Primary)	13	12	2.82745	14.8057	0.013	0.013	*
IRON_ION_HOMEOSTASIS	CTC lines	CCLE lines (Metastasis)	13	29	5.7508	39.9998	1.06e-06	2.12e-06	****

## Sheet: CTC_CCLE_media groups
Set	group1	group2	n1	n2	statistic	df	P value	FDR-adjusted P value	Significance level of FDR-adjusted P value
SREBP_TARGET	CTC lines	CCLE lines (DMEM; 10% FBS)	13	13	2.57157	23.8801	0.017	0.034	*
SREBP_TARGET	CTC lines	CCLE lines (EMEM; 10% FBS)	13	8	2.2268	10.9243	0.048	0.048	*
SREBP_TARGET	CTC lines	CCLE lines (RPMI-1640; 10%FBS)	13	20	2.71636	28.4466	0.011	0.033	*
FERROPTOSIS	CTC lines	CCLE lines (DMEM; 10% FBS)	13	13	7.89523	18.5508	2.4e-07	4.8e-07	****
FERROPTOSIS	CTC lines	CCLE lines (EMEM; 10% FBS)	13	8	3.86482	7.68695	0.005	0.005	**
FERROPTOSIS	CTC lines	CCLE lines (RPMI-1640; 10%FBS)	13	20	10.0338	30.9994	2.96e-11	8.88e-11	****
IRON_ION_HOMEOSTASIS	CTC lines	CCLE lines (DMEM; 10% FBS)	13	13	2.78505	16.245	0.013	0.025	*
IRON_ION_HOMEOSTASIS	CTC lines	CCLE lines (EMEM; 10% FBS)	13	8	3.18749	8.08838	0.013	0.025	*
IRON_ION_HOMEOSTASIS	CTC lines	CCLE lines (RPMI-1640; 10%FBS)	13	20	4.05805	27.8585	0.000362	0.001	***
