# Supplementary material for: The Lipogenic Regulator SREBP2 Induces Transferrin in Circulating Melanoma Cells and Suppresses Ferroptosis
Source: Oxford University Press journal article supplement (doi:10.1158/2159-8290.cd-19-1500), 2020-11-17
Supplement: 21598290cd191500-sup-234279_2_supp_6710150_qjjkw9.xlsx [file 21598290cd191500-sup-234279_2_supp_6710150_qjjkw9.xlsx]

## Sheet: ChIP-seq GSEA
	Normalized Enrichment Scores (NES)	P value	FDR-adjust P value
SREBP_TARGET	2.58406	0.00104932	0.0100735
CHOLESTEROL_HOMEOSTASIS	2.43163	0.00101729	0.0100735
ANDROGEN_RESPONSE	2.25465	0.00103734	0.0100735
MTORC1_SIGNALING	1.95423	0.001001	0.0100735
FERROPTOSIS	1.85481	0.0021322	0.0146208
FATTY_ACID_METABOLISM	1.79366	0.00100402	0.0100735
MYOGENESIS	1.75462	0.0030303	0.0181818
ESTROGEN_RESPONSE_EARLY	1.6643	0.002	0.0146208
IRON_ION_HOMEOSTASIS	1.63991	0.019958	0.096
