# Supplementary material for: The Lipogenic Regulator SREBP2 Induces Transferrin in Circulating Melanoma Cells and Suppresses Ferroptosis
Source: Oxford University Press journal article supplement (doi:10.1158/2159-8290.cd-19-1500), 2020-11-17
Supplement: 21598290cd191500-sup-234279_2_supp_6710151_qjjks9.xlsx [file 21598290cd191500-sup-234279_2_supp_6710151_qjjks9.xlsx]

## Sheet: TF.KD.vs.shCTRL
Gene	Log2FoldChange	P value	FDR-adjust P value
FABP4	4.35787	2.20874e-06	0.00292878
PAGE1	3.92782	6.66914e-05	0.00884328
CTSG	3.4831	1.95529e-06	0.00292878
TMEM233	3.27012	8.98175e-06	0.0044745
SAA1	3.23424	1.10173e-05	0.0044745
PSG9	2.98507	0.000602024	0.0265113
CD74	2.97636	0.000146214	0.0132191
IL1B	2.97039	7.98285e-05	0.00986759
SERPINB2	2.9007	1.51776e-06	0.00292878
EPYC	2.89953	0.00085287	0.0312977
MYOZ2	2.77154	3.72209e-06	0.00317282
ZNF593	2.72549	0.0126736	0.0913876
SAA2	2.60344	9.94658e-05	0.010991
COL8A1	2.558	3.16504e-05	0.00592045
RAMP1	2.5289	8.23177e-05	0.0100243
PLA1A	2.51139	1.24155e-06	0.00292878
PSCA	2.50664	2.73047e-06	0.00296231
FCER1G	2.46862	2.45562e-05	0.00516392
CST1	2.46825	5.85526e-05	0.00827853
SPRR2D	2.46504	2.18543e-06	0.00292878
PSG4	2.46027	2.67204e-06	0.00296231
NNMT	2.43738	9.7627e-07	0.00292878
NGFR	2.43189	3.58945e-07	0.00214182
LCN2	2.38469	0.00370703	0.0536474
HSPB8	2.3357	0.000121568	0.01199
CD36	2.31383	8.42607e-06	0.0044745
OLIG1	2.28942	3.65585e-06	0.00317282
PI3	2.28257	0.000840553	0.0312977
KLK6	2.27421	0.000318128	0.0203024
VSIR	2.24988	0.000110078	0.0114232
PYURF	2.23213	0.0351126	0.149657
TMEM140	2.22814	4.93754e-05	0.00727306
ITLN2	2.15959	0.00138359	0.0359933
IL24	2.132	9.94669e-06	0.0044745
M1AP	2.10523	0.000425058	0.0229531
CTGF	2.08779	2.15815e-05	0.00492168
ITIH6	2.02384	1.61728e-05	0.0044745
MUCL1	2.01493	0.000355856	0.0211283
BCL2A1	1.99387	1.99072e-05	0.00492168
TESC	1.96983	0.00255749	0.0463758
THBS1	1.95048	2.18992e-05	0.00492168
HLA-DRA	1.91961	0.000103119	0.0111875
LYZ	1.85684	0.000950144	0.0329165
GNG11	1.85344	9.87813e-06	0.0044745
FRZB	1.82349	0.00109835	0.033833
LBX2	1.79878	1.26731e-05	0.0044745
GPC6	1.79462	0.00017781	0.015157
CCDC189	1.7818	0.0422965	0.165295
MILR1	1.77457	1.19356e-05	0.0044745
CDKN1C	1.76516	0.000752714	0.0300735
LGI3	1.7582	1.50532e-05	0.0044745
NENF	1.75245	3.98999e-06	0.00317444
PROKR1	1.74497	7.17254e-05	0.00930403
PINLYP	1.72409	0.00217337	0.0435596
ITIH5	1.70914	1.34347e-05	0.0044745
CST7	1.70245	8.46299e-05	0.0100997
ANXA1	1.7022	4.34592e-06	0.00319839
CCND1	1.69363	1.10242e-05	0.0044745
S100A16	1.68968	8.02042e-05	0.00986759
EDA2R	1.68563	0.00060159	0.0265113
SERPINE2	1.68444	2.15328e-06	0.00292878
CD1A	1.66953	0.0013795	0.0359933
HLA-DRB1	1.65807	0.0011117	0.033833
COL9A3	1.65529	0.000204785	0.0159733
AREG	1.64997	0.00360772	0.0532727
CXorf65	1.63731	0.00266335	0.0467043
NES	1.62714	0.000150164	0.0134742
MLLT11	1.62286	2.227e-05	0.00492168
TTR	1.61964	0.0155493	0.0997398
TPST1	1.61909	4.89881e-05	0.00727306
UCHL1	1.61441	0.00173402	0.039226
TMC6	1.61216	3.60625e-05	0.00611909
CCL2	1.61157	0.00476493	0.0604004
BEX1	1.59014	1.21795e-05	0.0044745
SPRR2A	1.58946	0.0024699	0.0456282
SIRPB1	1.58453	9.54829e-05	0.0106599
HIST2H4A	1.58412	0.0013258	0.0355554
KCNRG	1.55679	0.0575619	0.195209
FAM167B	1.55008	0.00262212	0.0465344
SERTAD4	1.54916	0.000707516	0.0292162
RGS3	1.53713	0.000119986	0.01199
EMC6	1.52621	0.00260576	0.0465344
S100B	1.52546	1.42351e-05	0.0044745
SPR	1.52275	0.00121606	0.0349079
ZNF689	1.51832	3.69176e-05	0.00611909
FGFRL1	1.51775	1.51948e-05	0.0044745
FAM212A	1.5173	0.00459205	0.0595669
EVI2B	1.50351	0.00185618	0.0407199
CD163L1	1.49349	3.38905e-05	0.00603656
PF4	1.49284	2.20491e-05	0.00492168
GAPDHS	1.49002	4.60996e-05	0.00705325
TSTD3	1.48652	0.00828746	0.0766092
GATM	1.48498	0.000930546	0.0327157
PMP2	1.48416	0.000537243	0.025242
IL27RA	1.4764	0.000650557	0.0277797
IRF5	1.47622	0.0029465	0.0488376
RFPL4A	1.46738	0.00323893	0.0509938
CEACAM1	1.46465	6.54474e-05	0.00884328
SFTPC	1.4596	0.000762196	0.0300735
INA	1.4564	0.00192186	0.0413529
S100A13	1.45482	2.05494e-05	0.00492168
EXTL1	1.43644	0.00231858	0.044383
SPATS1	1.4301	1.33994e-05	0.0044745
C1orf122	1.4192	0.00635793	0.0686656
PYCRL	1.41304	0.000441195	0.023401
PROCR	1.41226	0.00191546	0.0413377
ALDH1A3	1.411	4.89271e-05	0.00727306
LA16c-306E5.2	1.4041	0.300131	0.50798
PLAUR	1.40103	1.53845e-05	0.0044745
DCXR	1.40066	0.00158883	0.0374852
WFS1	1.39878	0.000134729	0.0127142
GMPR	1.39511	0.000446599	0.0234789
HINT2	1.38888	0.00098602	0.0332389
SGSH	1.38631	0.000664271	0.0282114
MAGEB6	1.38344	0.0313577	0.141302
TMEFF2	1.38081	9.55382e-05	0.0106599
DNAJC28	1.37945	0.028659	0.134572
FOSL1	1.37817	0.00323004	0.0509938
SYNGR2	1.36835	0.0013002	0.0351851
METTL7B	1.36762	0.000234991	0.0172711
CALML5	1.36545	0.000521063	0.0249372
HIST1H4H	1.36145	7.82987e-06	0.0044745
DDRGK1	1.36	0.0025274	0.0462276
CARD16	1.35756	0.000195267	0.0157454
LOXL3	1.35596	2.55305e-05	0.00525312
ATOH8	1.35279	0.000413023	0.0225422
SMKR1	1.34825	0.0119277	0.0881394
LCE1C	1.34765	0.0107867	0.0845785
ALKBH7	1.34643	0.0137615	0.0939906
DDX28	1.34632	0.000567706	0.0258491
PUSL1	1.34374	0.0313081	0.141153
MSRB3	1.34309	2.80417e-05	0.0055775
SPANXN3	1.34163	0.0435417	0.168436
MEIG1	1.34139	0.00201362	0.0421589
LY96	1.33162	0.000998019	0.0332389
LAMB3	1.33144	0.0013549	0.0358469
MPV17L2	1.32826	0.00235449	0.044383
ZNF205	1.32538	0.0402482	0.160914
PGF	1.32516	0.000336228	0.0205142
NUDT16L1	1.32393	0.088101	0.248088
CXXC5	1.31556	0.000345733	0.0207
PRADC1	1.30662	0.0106726	0.0845727
CXCL1	1.30501	0.00191079	0.0413377
HBQ1	1.30222	0.0147347	0.0973667
SLC2A11	1.29757	0.000169379	0.0147546
TMEM86A	1.29448	8.36337e-05	0.0100817
ACTA2	1.29434	0.00107996	0.0337789
ETNK2	1.28693	3.26719e-05	0.00599856
GLUD2	1.28559	0.0004294	0.0230787
ATP5EP2	1.2809	0.0427673	0.166466
C1QTNF2	1.28043	0.00141232	0.0361589
MUC7	1.27501	0.0413919	0.163946
FGF1	1.27198	0.00101985	0.0332389
MOG	1.26854	0.000189652	0.0156091
MYOC	1.266	0.00662061	0.0695927
CA8	1.26547	0.00737748	0.0727218
DNASE2B	1.26513	0.00173733	0.039226
KTI12	1.25965	0.000171061	0.014793
SLC26A4	1.25788	1.97268e-05	0.00492168
DNPH1	1.25707	0.0273993	0.132115
HRH2	1.25591	0.000109788	0.0114232
DNAJC30	1.25068	0.00128637	0.0349693
AKR1A1	1.25053	2.22168e-05	0.00492168
NINJ2	1.24895	0.017269	0.10472
SCML4	1.24335	0.00125839	0.0349079
BOP1	1.23911	0.00271469	0.047117
RAB24	1.2309	0.00944246	0.080219
TMEM253	1.22991	0.0102831	0.0830303
PRDX1	1.2299	1.73826e-05	0.00460986
DLL3	1.22987	0.0078999	0.0749423
AC002429.5	1.2298	0.0213189	0.116068
FDXACB1	1.2286	0.0178082	0.106688
ALG1L	1.22464	0.00108299	0.0337789
BMX	1.22231	0.0286645	0.134572
SLC12A4	1.22014	0.00174709	0.039226
CTSD	1.21883	0.00018943	0.0156091
ZNF630	1.21657	0.00256976	0.0463758
LYNX1	1.21364	0.000863943	0.0314338
ISCU	1.21347	0.00156238	0.0371552
INPP5K	1.21296	0.0017514	0.039226
MS4A7	1.21284	0.000346908	0.0207
LY6E	1.21039	0.001286	0.0349693
TUBB2A	1.20987	0.00332817	0.0516494
CLDND2	1.20873	0.0097858	0.0816669
RELN	1.20849	7.30678e-05	0.00937624
C2orf15	1.20723	0.133251	0.314772
MCOLN3	1.20397	0.000217183	0.0165086
AMDHD2	1.19974	0.00337179	0.0519052
SEPT4	1.19955	0.0013528	0.0358469
TGFB3	1.19901	0.00720114	0.0719753
RUNDC3A	1.19379	0.00212692	0.0431677
IFI27L2	1.19168	0.00304672	0.0494015
TSR3	1.18466	0.00656827	0.0695927
KRT17	1.18372	0.0160992	0.10152
BMP4	1.18173	0.00302352	0.0493411
SUSD5	1.18137	0.00415111	0.0569138
EXOSC4	1.18123	0.00295776	0.0488376
SRPX	1.17836	0.0106923	0.0845785
CDRT15L2	1.17532	0.00130846	0.0353285
TMEM187	1.17504	0.0116451	0.0870568
SEZ6L2	1.17439	0.0107368	0.0845785
ISM1	1.17398	3.17335e-05	0.00592045
CAPNS2	1.17368	0.000339446	0.0205142
ITGA3	1.17296	0.00466245	0.0598699
CYTL1	1.1709	0.00016538	0.0145755
DUXA	1.16794	0.0629817	0.206094
FGF2	1.1672	0.00218909	0.0435652
CCDC107	1.16525	0.0511568	0.184432
C14orf80	1.16266	0.0073799	0.0727218
MPG	1.16106	0.0224256	0.120282
KLHL36	1.15874	0.00104173	0.0333298
TNFAIP6	1.15763	0.00208272	0.0427413
CARD19	1.15355	0.000473424	0.0241446
MVP	1.15326	0.000173951	0.0149347
LRWD1	1.14951	0.0231881	0.122067
HOXA5	1.14892	0.00544065	0.0632678
NOC4L	1.14762	0.00363376	0.0532835
RPUSD3	1.14718	0.000850678	0.0312977
OXLD1	1.14706	0.00286969	0.0482351
SEMA3D	1.14629	0.000957099	0.0329165
SHPK	1.14286	0.00266158	0.0467043
JTB	1.1421	0.0278437	0.132925
TMEM71	1.14022	0.00122708	0.0349079
SCG2	1.13937	0.000710746	0.0292484
SLC17A7	1.13807	0.00232872	0.044383
MALSU1	1.13581	0.0351762	0.149657
NINJ1	1.13442	0.000386906	0.0218831
MT2A	1.13276	3.64257e-05	0.00611909
FAM109B	1.13031	0.0116326	0.0870568
SLC35E4	1.12986	0.000542901	0.0254078
DNAJB5	1.12965	0.00305477	0.0494233
SPNS1	1.12651	0.00679894	0.0706167
LRRC45	1.12339	0.00372184	0.0536474
TMEM175	1.12327	0.0063049	0.068399
BDH1	1.12106	0.000693621	0.0288421
SPPL2B	1.11936	0.00576227	0.0651404
CEBPB	1.11923	0.0014237	0.0361589
SYCE3	1.11057	0.0420403	0.164908
HLA-DRB5	1.11044	0.00680652	0.0706339
ENTHD1	1.10488	0.0265574	0.130052
KBTBD8	1.10372	0.0378033	0.155621
NRCAM	1.1037	0.00186603	0.0407493
ADI1	1.09921	0.00192373	0.0413529
MAN2B1	1.09886	0.00203912	0.0423214
AP5Z1	1.09765	0.000718591	0.0293687
POPDC3	1.09433	0.00166886	0.0384481
OLFML2A	1.0924	0.00352028	0.0529075
C19orf73	1.09024	0.0261681	0.129385
NCR1	1.0898	0.0128386	0.0920152
TUSC2	1.08571	0.00892192	0.0786949
PDF	1.08565	0.010639	0.084493
NPDC1	1.08526	0.00146353	0.0365393
CLEC11A	1.08499	0.0160663	0.101407
SLC22A18AS	1.08213	0.00267258	0.0467043
APOA1	1.08199	0.00961365	0.0809501
FAM213B	1.08182	0.0130749	0.0922992
THOP1	1.07998	0.0297868	0.136932
CISD3	1.07997	0.00824519	0.0763362
SMAGP	1.07934	0.00436139	0.0580903
C1orf53	1.07904	0.0292091	0.135714
MGLL	1.07882	0.00421217	0.0571877
IFI44	1.07746	0.0185018	0.108662
LPXN	1.07636	5.05835e-05	0.00727306
A1BG	1.07635	0.00318214	0.0504996
TMEM134	1.07223	0.0322888	0.142875
CORO1B	1.07141	0.00731076	0.0725242
ARHGDIB	1.06934	0.00018261	0.0153469
OSBPL5	1.06836	0.000585156	0.0260569
SPACA6	1.06827	0.0371044	0.154161
HOXC4	1.06748	0.0177219	0.106332
ANO4	1.06508	0.00287738	0.0482672
SLC16A6	1.06244	0.00259364	0.0464753
DGKA	1.06194	0.00566516	0.064638
TRMT61A	1.05824	0.000166103	0.0145755
C19orf60	1.05819	0.00961402	0.0809501
CCL5	1.05628	0.0451654	0.172481
INPP5A	1.05569	0.0346462	0.148809
FBXW5	1.05469	0.0255913	0.127892
TAF10	1.0543	0.0035876	0.0531921
TAX1BP3	1.05302	4.47191e-05	0.00705325
SLC16A4	1.0528	0.018214	0.107855
RTN4R	1.05131	0.0075995	0.0737336
SMCO4	1.05002	0.0455813	0.173293
LGALS12	1.04884	0.00631806	0.068399
CCNO	1.04745	0.00295084	0.0488376
TMEM54	1.04714	0.00361998	0.0532727
C1orf216	1.04598	0.000749307	0.0300735
ATOX1	1.04348	5.89639e-05	0.00827853
IFI6	1.04304	0.0401951	0.160914
CD82	1.04269	0.00252373	0.0462276
ANKRD45	1.04253	0.00364663	0.0532835
LRRC29	1.04205	0.00902823	0.0791646
TM7SF2	1.03895	0.00592448	0.0659541
METTL23	1.03875	0.00283095	0.0479763
KIAA1755	1.03869	0.000210135	0.0162691
DUSP6	1.03842	0.00126448	0.0349079
SLC39A4	1.03738	0.00113766	0.0341128
HIST1H3H	1.03623	0.0190902	0.110301
AMACR	1.0345	0.000754747	0.0300735
PRAP1	1.0336	0.000497621	0.0244331
NRIP3	1.03316	0.000785575	0.0305647
BRAT1	1.03296	0.0250948	0.126665
DHRSX	1.03219	0.00411795	0.0568134
LRRC39	1.0307	0.0355921	0.150783
IL17D	1.0306	0.109266	0.28097
ALG3	1.02389	0.00231527	0.044383
SNF8	1.02386	0.00862301	0.0779017
HTR2B	1.02361	0.0023457	0.044383
LIMD2	1.02346	0.0134815	0.0934037
RHBDF2	1.02226	0.000264931	0.0182044
VPREB3	1.0207	0.0818108	0.237031
SUN3	1.01975	0.0388002	0.157792
HOXB13	1.01974	0.0143474	0.0960843
B4GAT1	1.01958	0.00199559	0.0418548
SPARCL1	1.01719	0.00542068	0.0632678
XYLT2	1.01537	7.39559e-05	0.00938925
MSMB	1.0153	0.00105064	0.033525
PHF7	1.015	0.00616809	0.0675016
BFSP1	1.01356	0.00351549	0.0529075
RPS27L	1.01317	0.000192282	0.0157149
PIK3IP1	1.01287	0.0268554	0.130927
GMPPB	1.01287	0.0021931	0.0435652
MAP3K7CL	1.01199	0.00115259	0.0343875
RAB36	1.01121	0.000569659	0.0258491
ZBTB16	1.00893	0.00595744	0.0662525
COX5A	1.00893	0.0417078	0.164462
DDO	1.00886	0.0107848	0.0845785
LYSMD2	1.00883	0.0965859	0.262115
RNASEH2C	1.00852	0.0093437	0.080219
PRKCDBP	1.00741	0.0334265	0.145187
CAPN5	1.00628	0.031856	0.142016
OLFML3	1.00411	0.0809852	0.235496
SPTY2D1-AS1	1.00356	0.0321414	0.142699
MISP3	1.00087	0.00983665	0.0819195
ADAMTS5	1.00041	0.02111	0.11551
FERMT2	0.99944	0.0701043	0.217607
LY6D	0.99356	0.0459833	0.173477
TMEM223	0.987833	0.0159646	0.10118
FST	0.987607	0.000464698	0.0239039
ADCK5	0.986236	0.00941577	0.080219
APOD	0.985534	9.11104e-05	0.0106599
ITGA1	0.985283	0.0124726	0.09054
NAA10	0.985173	0.00375629	0.053881
CD48	0.984775	0.0663404	0.210954
JMJD4	0.984218	0.0132217	0.0927531
H2AFX	0.984038	0.00327831	0.051338
PQLC2L	0.981337	0.0149512	0.0979132
MMP17	0.979673	0.00286105	0.0481576
HIST1H2BK	0.979663	0.000144327	0.0131503
THAP8	0.978318	0.0423978	0.165514
POLR3H	0.977865	0.00164553	0.0380576
CALM1	0.977222	0.00812156	0.0758987
FAM89B	0.977056	0.0149733	0.0979132
DAPL1	0.976366	0.105722	0.276069
PROS1	0.976043	0.000412008	0.0225422
ETFRF1	0.970952	0.000369854	0.0214264
ANO1	0.967885	0.00139642	0.0359933
QDPR	0.966506	0.000467316	0.0239354
FABP5	0.966475	0.000621588	0.0269747
PEX11G	0.96619	0.00603151	0.066896
MIF	0.964858	0.144831	0.330165
RHBDD3	0.964433	0.000212668	0.0162691
ADA	0.964191	0.00235771	0.044383
UCN2	0.962615	0.0099388	0.0821351
SLC27A4	0.961005	0.00233423	0.044383
POLR2L	0.960443	0.000118994	0.01199
CDKN2D	0.960206	0.0311462	0.140695
CYP4F11	0.95872	0.018898	0.10994
VAMP5	0.956498	0.00824572	0.0763362
INTS1	0.956177	0.00690536	0.0711032
SCAND1	0.955763	0.0999959	0.267303
MOAP1	0.954464	0.00502907	0.0609784
CLTB	0.953549	0.00372664	0.0536474
APBA3	0.953358	0.0335112	0.145426
CYP39A1	0.95271	0.117709	0.293021
RAB34	0.952619	0.000224454	0.0169534
ACYP2	0.952171	0.00216043	0.0434782
CKB	0.952129	0.0204014	0.113718
APLF	0.951963	0.000611179	0.0267173
SERPINA1	0.950954	0.000823434	0.0308671
TMEM40	0.950427	0.00233333	0.044383
TPM1	0.94711	0.000965238	0.0330062
SWI5	0.947015	0.000204345	0.0159733
ABHD17A	0.945933	0.0118146	0.0876836
CHPF2	0.943864	0.00142406	0.0361589
MAPRE3	0.943348	0.000268475	0.0182044
BCAR3	0.942815	0.0338671	0.146385
GLRX2	0.941692	0.0431046	0.167253
DGKG	0.941612	0.000509516	0.0246177
LDLRAP1	0.941562	0.000853888	0.0312977
SPATA18	0.940633	0.0113924	0.0862928
SORBS2	0.940376	0.0030662	0.0494233
SOCS2	0.939711	0.00195242	0.0413858
MAGEB6P1	0.939185	0.0961551	0.261428
THEM4	0.938672	0.00230218	0.044383
TUBB4A	0.938002	0.0247497	0.126413
GPR176	0.937318	0.00420794	0.0571877
C9orf16	0.935828	0.00274099	0.047117
SLC1A3	0.935466	0.00377467	0.0540191
CCDC153	0.935315	0.000140216	0.0129716
CH25H	0.935312	0.0122944	0.0897925
TNFRSF12A	0.934392	0.0411024	0.163179
DUSP23	0.934172	0.0711495	0.219575
BCAR1	0.933982	0.00170014	0.0388896
KRT79	0.930639	0.0303957	0.138716
FAM174A	0.930223	0.0310673	0.140598
PDLIM7	0.930185	0.0518559	0.185528
PLPPR1	0.930116	0.00968305	0.0812069
RCC1L	0.930054	0.00126949	0.0349079
WDR18	0.927644	0.0500228	0.18217
ENG	0.925462	0.00637094	0.0687439
PICK1	0.924749	0.0069881	0.0712787
HLA-DPA1	0.923237	0.110856	0.283349
CYB561D2	0.92066	0.00107193	0.033753
CYP4V2	0.920145	0.0316751	0.141932
PGS1	0.92004	0.0130801	0.0922992
TFPT	0.917841	0.000575858	0.0259266
IFNLR1	0.917255	0.00766573	0.0739949
CBR1	0.916938	0.00874821	0.0782617
GGACT	0.915993	0.00155386	0.0370875
HIST1H4I	0.913909	0.00302191	0.0493411
PHF19	0.912853	0.000262386	0.0182044
RANBP10	0.912549	0.00956238	0.0809344
TFF2	0.912336	0.250331	0.453625
DEC1	0.912157	0.0424888	0.165815
GADD45GIP1	0.912152	0.0227761	0.12116
PXMP2	0.910642	0.0926005	0.255783
HSPBP1	0.909768	0.0526576	0.186601
LINC00094	0.905434	0.0166223	0.102917
PLPP7	0.90336	0.00492269	0.0609784
RER1	0.901486	0.0227612	0.12116
QPRT	0.901057	0.0216558	0.11758
C22orf23	0.900935	0.234963	0.436588
TMEM147	0.900264	0.00123912	0.0349079
PYCARD	0.89953	0.0525449	0.186421
NANOS1	0.899328	0.0364693	0.152929
S100A9	0.898911	0.212442	0.411571
GPR3	0.898683	0.00804986	0.0757934
AKR1B10	0.896564	0.150584	0.337722
PLXNB2	0.896109	0.000376133	0.0215806
ZNF747	0.895079	0.00939318	0.080219
ATP6V0E1	0.89507	0.000324497	0.0205142
CT55	0.892831	0.00120948	0.0349079
CIAO1	0.892545	0.0132473	0.0927884
ZNF563	0.891767	0.0330082	0.144595
TMEM35B	0.891717	0.00033659	0.0205142
TRMT2A	0.891536	0.000821249	0.0308671
NOV	0.891466	0.00193701	0.0413529
ZNF688	0.89064	0.0103954	0.0832611
SH3BGRL3	0.890571	0.000338691	0.0205142
EIF4EBP1	0.890159	0.0117198	0.0874148
MTMR14	0.890116	0.0159951	0.101265
SURF1	0.890015	0.00122382	0.0349079
NUDT14	0.889374	0.0374172	0.154745
ATP2B4	0.887293	0.0190691	0.110301
PLEK2	0.886694	0.22131	0.421566
GALNT2	0.886281	0.000532169	0.025242
CYR61	0.884978	0.00191551	0.0413377
ABCD1	0.884555	0.0376821	0.155443
P2RX6	0.884407	0.0838184	0.240839
B3GALT2	0.883382	0.0406803	0.162013
CC2D1A	0.883343	0.00205911	0.0423679
STEAP3	0.882799	0.0269557	0.131034
TRPV4	0.880723	0.00245132	0.0454256
THTPA	0.880177	0.0133688	0.0933001
IL13RA2	0.880127	0.181924	0.376673
MRPL4	0.879711	0.0408414	0.162521
ABHD11	0.878228	0.0174461	0.105544
FCRLB	0.878061	0.0022637	0.0441687
RWDD4	0.877228	0.034755	0.149036
SLC12A7	0.87656	0.00857031	0.0778372
DHRS12	0.875563	0.00179576	0.0399825
GALK1	0.874698	0.00483283	0.0607105
C1S	0.874024	0.004161	0.0569138
RASSF7	0.873651	0.0404905	0.16161
SMCO3	0.872759	0.0198688	0.112377
CLCN2	0.870724	0.0127089	0.0914416
COMTD1	0.869968	0.102498	0.27112
AMPH	0.869893	0.00181444	0.0402163
GAGE2A	0.869434	0.302888	0.510335
DENND2A	0.86941	0.00244925	0.0454256
SPINK13	0.866982	0.1535	0.34139
UNC5CL	0.866696	0.0651339	0.20964
C16orf45	0.865064	0.00109646	0.033833
NFKBIB	0.862975	0.0227109	0.121153
ARG2	0.861604	0.0585334	0.196882
PTPMT1	0.860448	0.0884312	0.248783
RAB27A	0.859808	0.000329183	0.0205142
B3GNT9	0.859554	0.000849948	0.0312977
OST4	0.858878	0.000203822	0.0159733
SPRYD4	0.857982	0.000618489	0.0269381
BCL2L12	0.857693	0.0241472	0.124858
MAP1LC3C	0.857034	0.222797	0.423554
NAT1	0.857005	0.0636668	0.207148
MIA	0.85527	0.000934813	0.0327157
UBTD1	0.854621	0.0484808	0.179013
RIPK4	0.853375	0.000412961	0.0225422
ST6GALNAC2	0.852889	0.008858	0.0785959
PNPLA2	0.852712	0.00131244	0.0353559
PARD6A	0.852217	0.0540858	0.189236
FEZ1	0.851581	0.0123055	0.0898188
HOGA1	0.850987	0.00327577	0.051338
PDGFA	0.849543	0.0653895	0.210016
EPHX2	0.848828	0.00586485	0.0655456
NDUFB1	0.848782	0.00154572	0.0369671
PPP1R3E	0.848246	0.0911377	0.25341
HM13	0.848218	0.0069449	0.0711347
TRPM2	0.84802	0.0047325	0.0603048
AP5B1	0.847936	0.00880353	0.0784625
ARHGEF6	0.847921	0.00118787	0.0349079
NDUFA4	0.847629	0.000547946	0.0254443
GAD1	0.847366	0.0137945	0.0940571
S100A6	0.846951	0.000433516	0.0230963
TREM2	0.846436	0.0467355	0.17539
GCAT	0.844514	0.0155576	0.0997398
C7orf50	0.844466	0.00402797	0.0562268
FURIN	0.844387	0.000578833	0.0259266
COTL1	0.843964	0.000579621	0.0259266
RITA1	0.843326	0.0381402	0.156349
PLPPR2	0.843212	0.00765913	0.0739949
CDC42EP1	0.843062	0.0145813	0.0967862
FKBP11	0.842989	0.019511	0.111531
NFE2	0.842234	0.246371	0.448748
MMP15	0.841791	0.00150019	0.0367521
SLC9A3	0.841484	0.026188	0.129385
RBFA	0.841314	0.018049	0.107484
SMIM4	0.838598	0.000455731	0.0238539
SNAP29	0.837013	0.0151901	0.0985208
ARHGAP4	0.835871	0.00838601	0.0771827
PRAF2	0.835602	0.0065985	0.0695927
ASRGL1	0.835411	0.00898982	0.0789437
SOSTDC1	0.834619	0.00872231	0.0781472
SUFU	0.834549	0.048752	0.179625
METTL26	0.83432	0.0202486	0.113237
CFHR1	0.834172	0.0399684	0.160462
BBS12	0.834158	0.0982729	0.264678
SRD5A3	0.830892	0.024281	0.125116
SYT6	0.83003	0.0139917	0.0949269
RPS19BP1	0.829078	0.0144839	0.0964566
SEL1L3	0.828361	0.0136943	0.0938704
GLRX	0.828289	0.027679	0.132713
HIST2H2AA4	0.828206	0.0300015	0.137707
TRIM8	0.827358	0.0202056	0.113185
GID4	0.827108	0.00368675	0.0535282
DEDD2	0.826548	0.0139813	0.0949105
ACADVL	0.826493	0.00342441	0.0524607
TSPAN8	0.826389	0.22137	0.421613
C20orf24	0.826371	0.00072384	0.0294823
AMPD2	0.825108	0.00512671	0.0616134
ZNF287	0.823929	0.0155618	0.0997398
UNC119	0.823889	0.0351891	0.149657
SNX32	0.823694	0.0582875	0.196185
GPX1	0.822983	0.0136514	0.0937916
LMO7	0.822882	0.0118621	0.0878522
SLC3A2	0.822555	0.0293441	0.13605
F2RL2	0.821981	0.0766274	0.227842
PLPP6	0.821897	0.0752065	0.225928
TSPAN33	0.820539	0.000261097	0.0182044
PODNL1	0.819307	0.0105555	0.0842039
CA7	0.81901	0.0283337	0.133922
GMIP	0.817748	0.0164282	0.102287
RRP9	0.817559	0.000545916	0.0254443
MGAT1	0.817065	0.00175856	0.0393008
INO80B	0.816095	0.0666681	0.211476
VTI1B	0.81579	0.0176032	0.106093
BID	0.815542	0.00355273	0.0530221
CRABP1	0.815513	0.0560852	0.192777
COL12A1	0.815363	0.00220682	0.0435666
UFSP1	0.815135	0.0542312	0.189571
LRRC36	0.815129	0.0888882	0.249539
GTF3A	0.814725	0.0138751	0.0943743
PNMAL1	0.814679	0.0094461	0.080219
L3HYPDH	0.81459	0.00757927	0.0737094
TOLLIP	0.8144	0.00890784	0.0786642
GINM1	0.814168	0.00214207	0.0433279
ARSI	0.814124	0.00501946	0.0609784
TSPO	0.813819	0.0183535	0.108378
DGCR6L	0.813506	0.0201528	0.113072
RHBDD2	0.813339	0.00532616	0.0628203
SNX24	0.813077	0.0202802	0.11336
SLC35F5	0.812502	0.0104341	0.0834026
WDR24	0.812441	0.0553944	0.1922
RABEP2	0.811687	0.0150816	0.0982981
LRCOL1	0.811582	0.0755676	0.226385
EREG	0.810497	0.0194567	0.111531
MGST2	0.810196	0.000688034	0.0287098
UBOX5	0.809357	0.00234834	0.044383
LDHD	0.809198	0.0493273	0.180852
MYOF	0.80861	0.0311018	0.140647
MRPL57	0.805211	0.00170986	0.0390162
SSX5	0.805124	0.0179635	0.10722
ZNF416	0.80455	0.109204	0.280913
HACD1	0.803984	0.0293956	0.136233
SLC46A1	0.803301	0.111963	0.284959
GLI4	0.802973	0.00305964	0.0494233
C21orf2	0.802443	0.0398295	0.160414
FAM173A	0.801748	0.000809397	0.0307552
TSPAN15	0.801084	0.0158726	0.100961
RIPK2	0.800564	0.00741038	0.0727218
MIEF2	0.799617	0.0074006	0.0727218
ZNHIT2	0.798942	0.0580697	0.195819
TRNP1	0.798558	0.0740707	0.22464
ARHGEF40	0.798365	0.00612343	0.067385
TRIM6	0.798294	0.036141	0.152083
PKLR	0.798142	0.0268845	0.130948
CDC34	0.798034	0.0124388	0.0904117
ANKRD39	0.797838	0.00254531	0.0463752
MRPS26	0.797567	0.0953941	0.260035
ADGRE2	0.797384	0.0438458	0.169174
NOL7	0.797052	0.059077	0.198096
RHOC	0.796977	0.000458733	0.0238736
TIMM29	0.796741	0.00685575	0.0708368
FDX1	0.796482	0.0372418	0.154428
B4GALT7	0.796037	0.0193318	0.111184
CCNJL	0.795925	0.0081127	0.0758987
TAC4	0.795855	0.0456172	0.173308
NAA40	0.795819	0.00451627	0.0587756
ARHGEF26	0.795069	0.0654277	0.210016
MGAT2	0.794783	0.442219	0.640466
SLC39A11	0.794598	0.0158962	0.100962
DNLZ	0.793652	0.0122414	0.0896801
MGP	0.793414	0.000717988	0.0293687
TMEM259	0.79167	0.000780408	0.0305357
CTHRC1	0.791554	0.0281945	0.133574
C11orf68	0.791276	0.04218	0.165122
PLCL1	0.791246	0.00472069	0.0602741
ALDH1B1	0.791233	0.000372767	0.0214908
DUT	0.790891	0.038766	0.157792
CTBS	0.790401	0.015522	0.0996984
POLDIP2	0.78999	0.00254309	0.0463752
MOCS1	0.789801	0.0141197	0.0953618
GNGT1	0.78958	0.025945	0.128797
TBC1D10A	0.787756	0.00654559	0.0695592
FJX1	0.787635	0.0288066	0.134806
MRPL12	0.786599	0.0485188	0.179066
TMEM220	0.785335	0.0240846	0.124656
PRELID1	0.784695	0.0256142	0.1279
EVI5	0.784685	0.00581965	0.0655205
DKK3	0.784573	0.0018897	0.0410777
RHPN1	0.784119	0.0665883	0.211291
SMPDL3A	0.783802	0.0103429	0.0831411
RP11-811O14.1	0.783689	0.174783	0.368007
DACT1	0.783271	0.0165521	0.102721
PIP5K1C	0.782874	0.00237034	0.0445474
SS18L1	0.782101	0.00205637	0.0423679
AMOTL2	0.781635	0.00128631	0.0349693
MICU2	0.781572	0.0261669	0.129385
UGT2B7	0.781519	0.00970017	0.0812363
EHD3	0.781332	0.0676042	0.212985
VDR	0.780406	0.0116075	0.0869578
ACTG2	0.779186	0.102519	0.27112
ADAP1	0.778441	0.0307923	0.139778
C15orf52	0.778114	0.0033019	0.0515097
RBCK1	0.777719	0.0092257	0.0800142
RFTN2	0.77764	0.014847	0.0977836
KLF9	0.777525	0.00583552	0.0655418
TMEM229B	0.776282	0.00151921	0.0369435
MVB12A	0.77399	0.00988587	0.0821099
SCPEP1	0.773477	0.00149946	0.0367521
TGFB1I1	0.773054	0.0259059	0.128656
COQ4	0.772915	0.0102416	0.0830194
ABHD3	0.772898	0.0471692	0.175802
ABHD2	0.772844	0.00343804	0.0525346
CMBL	0.772592	0.024087	0.124656
C11orf80	0.772046	0.0196711	0.111937
ACBD7	0.7718	0.0742954	0.225083
POLD4	0.771338	0.0011939	0.0349079
HRK	0.770531	0.013048	0.0922482
FAM133A	0.770034	0.0202916	0.113371
CPN1	0.769643	0.00261307	0.0465344
TRPV2	0.768578	0.00123751	0.0349079
FHOD1	0.768563	0.00661204	0.0695927
TRABD	0.768368	0.0303567	0.138644
CRIPT	0.768053	0.00499189	0.0609784
HOXA1	0.767998	0.0715903	0.220203
OCEL1	0.767864	0.0129578	0.0920463
ARL6IP4	0.767847	0.0512619	0.184432
MRPL41	0.767843	0.160379	0.350171
MAPT	0.767808	0.00364897	0.0532835
TREX1	0.7678	0.00111541	0.033833
TUBB6	0.767503	0.0130632	0.0922992
STAMBPL1	0.767451	0.0231181	0.121935
ZNF547	0.767152	0.00494181	0.0609784
PDCD2L	0.766278	0.0283897	0.134023
EGR3	0.766169	0.00430356	0.0577713
MINDY1	0.765648	0.0031661	0.0503211
SPHK2	0.765057	0.0388169	0.157792
TOPORS-AS1	0.764681	0.0277875	0.132859
CCL3	0.764016	0.11068	0.28302
CPA3	0.763672	0.0469039	0.17557
TPBGL	0.763626	0.014617	0.0969643
FYB	0.763459	0.041595	0.164271
SQRDL	0.763454	0.00116004	0.0345235
ATP1B1	0.762547	0.00372625	0.0536474
NLRX1	0.762244	0.00123532	0.0349079
LRRC34	0.75996	0.0631078	0.206393
RBM42	0.759678	0.0748939	0.225383
FDXR	0.759386	0.00486907	0.0609784
LMF1	0.759343	0.002299	0.044383
ROGDI	0.758573	0.1615	0.351449
RSPH1	0.758323	0.0696015	0.216865
BTG2	0.757954	0.0097927	0.0816674
PACSIN3	0.756851	0.0237781	0.123862
ACP2	0.756779	0.00358957	0.0531921
ACTB	0.756401	0.0244907	0.125492
ZRANB1	0.756285	0.0111024	0.0853356
PHLDA3	0.756283	0.000431251	0.0230787
MRPS18C	0.756016	0.000502303	0.0244331
POMGNT1	0.755891	0.0011309	0.0341128
RNF126	0.754991	0.0961496	0.261428
KLRC2	0.753712	0.002088	0.0427413
SLC22A18	0.751442	0.00346346	0.0527638
C8orf82	0.751118	0.012956	0.0920463
ZDHHC20	0.749383	0.0223048	0.119903
DESI1	0.749187	0.0195938	0.111659
RNF128	0.749157	0.00872103	0.0781472
MLIP	0.747493	0.00794208	0.0752826
SLC39A13	0.747441	0.00159429	0.0374852
C11orf96	0.746282	0.0014938	0.0367521
CXCR3	0.745968	0.191475	0.388815
SNAPC2	0.745967	0.00378486	0.0540941
UBE2F	0.745925	0.00359198	0.0531921
ATP1B3	0.745762	0.0155619	0.0997398
DOHH	0.744638	0.0203664	0.113629
HESX1	0.744539	0.0342133	0.147508
GAS6	0.744539	0.236887	0.438888
NTN4	0.742802	0.0883837	0.248718
CAMKK2	0.7428	0.00967816	0.0812069
MAPKAP1	0.742691	0.0124509	0.0904376
ACTRT3	0.742686	0.0913941	0.254005
ZNF197	0.742118	0.00420905	0.0571877
LIMK1	0.741026	0.0369471	0.154037
DPP7	0.740756	0.115747	0.289952
SLC52A2	0.740623	0.0464469	0.17461
HTRA2	0.740427	0.0248932	0.12663
PHOSPHO2	0.739827	0.0652206	0.209852
CLEC2B	0.739332	0.00257413	0.0463758
C1orf56	0.739141	0.00280318	0.0477055
PTPRR	0.738933	0.0118387	0.0878078
RUBCNL	0.738729	0.0422146	0.165122
SIX5	0.738306	0.0619972	0.204206
WDR44	0.737254	0.091107	0.253384
ZNF358	0.73718	0.0191407	0.110457
THEM6	0.737097	0.00499486	0.0609784
AURKAIP1	0.736781	0.0287305	0.134776
MT1G	0.736546	0.101006	0.268765
PSMD8	0.736168	0.0040282	0.0562268
VARS	0.736156	0.0112914	0.0858835
C15orf57	0.735918	0.00220863	0.0435666
C3orf70	0.735336	0.0106332	0.084493
MRPS2	0.73497	0.0114126	0.0862928
LSM4	0.734756	0.0910726	0.253379
CACNB3	0.733944	0.236986	0.438888
CHIC2	0.733702	0.0574252	0.194909
ELL2	0.733096	0.0359083	0.151436
ABHD6	0.732712	0.00106564	0.0336438
SUMO3	0.732107	0.00843372	0.077239
MSRB2	0.731637	0.0301661	0.138038
KRT10	0.731162	0.00787476	0.0747728
THBS2	0.730961	0.00160634	0.0375884
MEOX1	0.729968	0.0647208	0.209173
PDCD6	0.729819	0.0234135	0.122659
ADIPOR1	0.729806	0.00580748	0.0654452
XAGE1B	0.729794	0.00960561	0.0809501
LYPLAL1	0.729763	0.00088781	0.0319713
ARPC1B	0.729664	0.0170347	0.104252
FCER1A	0.728671	0.241819	0.443481
MAPKAPK3	0.728382	0.0961899	0.261428
TOR1A	0.728365	0.0153119	0.0990953
TALDO1	0.727328	0.00125361	0.0349079
UQCRFS1	0.726445	0.026214	0.129385
HOXC5	0.725927	0.192614	0.389933
FKBP1C	0.725412	0.00823656	0.0763362
TSPAN17	0.725213	0.0397184	0.160243
ACADS	0.724665	0.0414485	0.164062
CBX7	0.724527	0.0969778	0.262732
RGS19	0.724176	0.0211732	0.115712
FAM214B	0.723778	0.00489536	0.0609784
PPCS	0.723375	0.00884191	0.0785491
AK3	0.723199	0.0196049	0.111659
MTUS1	0.723181	0.00388333	0.0551055
RAB32	0.72292	0.0577752	0.195467
PTS	0.721965	0.00375641	0.053881
FSD1	0.721236	0.153429	0.34139
C11orf71	0.72113	0.091798	0.254831
SPAG1	0.720907	0.028497	0.134208
KIFC3	0.720482	0.00766864	0.0739949
TFPI2	0.719686	0.0314193	0.141387
KCNIP4	0.719464	0.0420493	0.164908
GSG2	0.719117	0.0115114	0.0867046
HIST1H2BC	0.718374	0.00100429	0.0332389
C19orf24	0.717455	0.00147313	0.03668
LTBR	0.717427	0.0256062	0.1279
CH507-9B2.3	0.716555	0.0143001	0.0958904
RASGRP3	0.715653	0.0331023	0.144679
C14orf37	0.715025	0.0421172	0.165066
ASPHD1	0.71484	0.0041378	0.0569138
BCAS4	0.714598	0.0047816	0.0604488
SESN2	0.713751	0.0164117	0.102287
WDR63	0.71284	0.0637918	0.207399
RPP40	0.711323	0.000914446	0.0324792
PLEC	0.711195	0.0128609	0.0920152
NUDT6	0.71088	0.140181	0.323395
GPN2	0.710802	0.00560451	0.0640653
HDAC9	0.71037	0.00584901	0.0655418
POMP	0.71036	0.0013914	0.0359933
S100A11	0.709898	0.000818974	0.0308671
RGS1	0.709698	0.00549351	0.0636321
ANKS1A	0.709489	0.00502867	0.0609784
LPAR2	0.708767	0.0469661	0.175593
AACS	0.708661	0.0477597	0.177228
NUDT16	0.70827	0.00499439	0.0609784
PFN1	0.707908	0.061735	0.203746
MED19	0.70751	0.0248826	0.12663
HIST1H2AC	0.706164	0.0048177	0.0605842
COL19A1	0.705849	0.00102001	0.0332389
MAGEA4	0.705669	0.230145	0.431712
CDK9	0.705397	0.00274778	0.047117
CEMIP	0.704991	0.00431022	0.0577956
SSPN	0.704849	0.00186226	0.0407493
NUDT13	0.704423	0.0039687	0.0559027
MT-ND3	0.704174	0.000677016	0.0286507
LYPD6	0.703173	0.134345	0.31573
RPUSD1	0.703087	0.106968	0.277451
DNM2	0.702637	0.0111526	0.0853757
SMIM10L1	0.702099	0.0123382	0.0899527
COL6A1	0.70188	0.0103374	0.0831411
ALDH4A1	0.701822	0.00554684	0.0638342
KDR	0.701743	0.0361323	0.152083
IGFLR1	0.701147	0.0150504	0.0982021
VTN	0.700188	0.142417	0.326533
ENC1	0.700045	0.0400704	0.160632
PIGH	0.699891	0.0101058	0.0827746
TBX2	0.699513	0.0055191	0.0636321
ABCB9	0.698969	0.00068637	0.0287098
APOBEC3H	0.698543	0.341814	0.548575
OGFR	0.698464	0.0635043	0.20684
UBR3	0.69845	0.0010869	0.0337789
CYP1A1	0.698237	0.00133984	0.0356912
SRP68	0.697991	0.00146154	0.0365393
SEMA6B	0.697534	0.0354494	0.150381
PUS10	0.697529	0.0700607	0.217607
HHATL	0.697109	0.132464	0.313542
SPARC	0.696625	0.000889432	0.0319713
MXD3	0.695657	0.0417222	0.164462
CRIP2	0.695334	0.0183722	0.10839
TMEM185A	0.695316	0.0244568	0.125492
ALDH16A1	0.695026	0.127082	0.306136
ACTR1B	0.695008	0.0114083	0.0862928
ADPRH	0.694401	0.254978	0.458704
LAGE3	0.693514	0.00661998	0.0695927
MBOAT1	0.692912	0.10479	0.274693
CRIPAK	0.692809	0.0160678	0.101407
PKMYT1	0.692276	0.122681	0.300569
UBALD1	0.69223	0.0106185	0.084493
NANOS3	0.692119	0.0909551	0.253257
BFSP2	0.6921	0.0964524	0.261903
LRP12	0.691706	0.0241286	0.124816
RGS12	0.691511	0.00124801	0.0349079
GDF15	0.691026	0.00248469	0.0457597
FUCA2	0.690897	0.00653476	0.0695592
SPSB3	0.690218	0.014224	0.0956871
NSMCE4A	0.690102	0.071174	0.219594
ZNF346	0.690018	0.0122007	0.0895888
MGAT4B	0.689857	0.0759571	0.227015
RCAN2	0.689606	0.0850424	0.242682
PQLC1	0.688268	0.00196611	0.0415147
SNRPB2	0.688164	0.000605936	0.0265855
KLHDC2	0.687678	0.0993244	0.266428
MYDGF	0.687205	0.0794991	0.23282
RAB15	0.687082	0.0147285	0.0973667
SLC25A22	0.686621	0.00897887	0.078914
EMILIN2	0.686271	0.00402832	0.0562268
C5orf46	0.685869	0.219125	0.419346
SHROOM4	0.685666	0.0572766	0.19474
PSMA7	0.685189	0.00444553	0.0582359
MYH14	0.685164	0.00867137	0.0781232
C16orf59	0.684645	0.016439	0.102287
KDELR3	0.684448	0.00329173	0.0514182
ZNF574	0.68402	0.0458397	0.173384
ZNF827	0.683916	0.00121883	0.0349079
HOMEZ	0.683435	0.00843972	0.077239
BCL2	0.68248	0.00306877	0.0494233
FAHD2B	0.681819	0.00728255	0.072425
TMEM205	0.68159	0.0044584	0.0583405
SLC18A1	0.681163	0.164429	0.354846
JOSD2	0.680969	0.02494	0.126639
CRAT	0.680734	0.0233445	0.122497
GRAMD1A	0.680438	0.0199555	0.112653
TCTA	0.680346	0.00377509	0.0540191
PRR5	0.68023	0.00632365	0.068399
BMP8B	0.67983	0.00144283	0.0364803
COX14	0.67934	0.00101124	0.0332389
NPFF	0.678576	0.262666	0.46672
TNFSF12	0.678384	0.050834	0.183778
CYB5R1	0.678247	0.00149359	0.0367521
ZNF428	0.678209	0.0346264	0.148805
ERCC2	0.678172	0.0154664	0.0995709
CCL18	0.677731	0.0520389	0.185771
FAM134B	0.677585	0.00734621	0.0726344
IMPDH1	0.677101	0.0122227	0.0896132
MAGIX	0.677044	0.00612347	0.067385
TRIM62	0.676947	0.00646729	0.0694309
MOK	0.676097	0.0101753	0.0830194
TMEM117	0.675726	0.0816783	0.236736
TBCB	0.675443	0.0244645	0.125492
FAM65B	0.675163	0.0368591	0.153749
LRRC14	0.675088	0.0469393	0.17557
FSBP	0.67483	0.317241	0.523862
CRYAB	0.674229	0.00132517	0.0355554
GDE1	0.673831	0.00153424	0.0369435
HAGH	0.673226	0.013118	0.09236
ARRDC1	0.673074	0.00205831	0.0423679
SDSL	0.67265	0.00934034	0.080219
C16orf71	0.672567	0.0360998	0.152017
PPP4C	0.672367	0.0522776	0.186177
ZNF706	0.672271	0.00197334	0.0415342
ORMDL2	0.672051	0.00133024	0.0355943
N4BP2L1	0.671784	0.0554023	0.1922
ACSBG1	0.671464	0.0611307	0.202311
PCDHB9	0.671263	0.047136	0.175802
MLANA	0.670661	0.000994728	0.0332389
RAMP2	0.670463	0.177859	0.371859
IRX6	0.670333	0.0579552	0.195654
SFRP1	0.670166	0.00538988	0.0631234
MTRF1L	0.669268	0.0111602	0.0853757
CRIM1	0.669233	0.00991699	0.0821351
PSMG4	0.668433	0.0319894	0.142228
TRIB1	0.668119	0.11214	0.285225
BORCS6	0.667988	0.0229763	0.121735
F2R	0.667967	0.00235193	0.044383
NFE2L3	0.667835	0.00662455	0.0695927
RRS1	0.667794	0.0304953	0.138958
CAV1	0.66748	0.00120942	0.0349079
NMI	0.667272	0.00654313	0.0695592
CNTN3	0.667252	0.0925045	0.255783
HOXB6	0.666836	0.000879787	0.031913
NAIF1	0.666634	0.0163162	0.102053
TAF1C	0.666578	0.00551657	0.0636321
DYRK1B	0.666042	0.00900664	0.0790333
COG1	0.665932	0.00592064	0.0659541
TIMM8B	0.665718	0.00256249	0.0463758
TNFSF4	0.6655	0.0305352	0.139087
PRRG4	0.66499	0.0649662	0.209486
SLC25A53	0.664901	0.0103324	0.0831411
FAXC	0.664714	0.0557224	0.192639
BCL6	0.664024	0.0309116	0.140106
DBNL	0.663815	0.00918401	0.0798266
FAM20C	0.663802	0.0510152	0.184043
FAM122A	0.663727	0.00105749	0.0335641
EVA1A	0.663592	0.0600161	0.199972
FKBP1A	0.663582	0.00780658	0.0746896
ZDHHC24	0.663402	0.0100257	0.0825151
PRAG1	0.663395	0.0715343	0.220203
MTHFD2L	0.662383	0.00745772	0.0728914
B9D2	0.661787	0.0217424	0.11776
MAP2K2	0.661415	0.0100668	0.0825966
GORASP1	0.661121	0.0342784	0.147628
HIST2H2AA3	0.660991	0.0431481	0.167294
GPX8	0.660295	0.00153354	0.0369435
TXNRD2	0.659649	0.0210205	0.115417
TMEM86B	0.657971	0.0461893	0.174107
SRM	0.657657	0.00781993	0.0746896
SSC4D	0.657547	0.0641741	0.208005
FSTL4	0.657532	0.00351687	0.0529075
PNMA6A	0.657491	0.0663272	0.210954
LRP10	0.65724	0.00404617	0.0562785
H2AFY2	0.657166	0.00890585	0.0786642
RDH14	0.656213	0.0620163	0.204206
C6orf47	0.656119	0.0405936	0.161863
PQLC2	0.656086	0.00252946	0.0462276
HIST3H2A	0.655937	0.264231	0.4682
MFSD2A	0.654841	0.0753471	0.225928
EPDR1	0.654626	0.000989214	0.0332389
TRPC4AP	0.654598	0.012287	0.0897925
COMMD7	0.653662	0.0247658	0.126413
TMED3	0.653039	0.064329	0.208275
RADIL	0.652968	0.051478	0.184865
RELL1	0.652605	0.00682648	0.0707181
ACOT13	0.651983	0.0144436	0.0964425
GPM6B	0.651925	0.00182649	0.0403654
SAXO2	0.651227	0.0996818	0.266897
DEPDC7	0.650498	0.0862373	0.244597
CDRT4	0.650184	0.0773303	0.229262
BTBD6	0.650184	0.0317376	0.142016
PLPP5	0.649764	0.00818325	0.0760829
FBXO2	0.649652	0.0273672	0.132066
CYHR1	0.649636	0.0373095	0.154601
AP3B2	0.649591	0.0444671	0.170579
FRG2	0.648096	0.124445	0.30284
KLRG1	0.647647	0.150241	0.3373
HDAC5	0.647519	0.0201528	0.113072
STARD10	0.646207	0.0130939	0.0922992
RAB17	0.646085	0.00416353	0.0569138
GABRA3	0.646019	0.0647004	0.209173
LSM10	0.64588	0.00126701	0.0349079
MROH1	0.645692	0.0282178	0.133632
THRA	0.645526	0.013767	0.0939906
C18orf32	0.64523	0.0083666	0.0771827
BORCS8	0.644738	0.0203164	0.113456
CISD1	0.644381	0.00225047	0.044028
TEKT5	0.64432	0.0554351	0.1922
LMO4	0.644177	0.0093448	0.080219
GBA	0.643936	0.00361188	0.0532727
PCDH1	0.643388	0.0256446	0.127903
LMNA	0.642955	0.00364221	0.0532835
POLR3E	0.642449	0.0209189	0.115109
LRCH4	0.64221	0.0414957	0.164194
PTPRS	0.642074	0.00630826	0.068399
CTSH	0.641181	0.00158987	0.0374852
GUCA1C	0.64115	0.270712	0.47615
PYGB	0.640663	0.00295494	0.0488376
ZFYVE28	0.64042	0.00891185	0.0786642
EFHD2	0.640203	0.0385215	0.157383
KRT27	0.639539	0.00312399	0.0499755
USMG5	0.639486	0.0046527	0.0598699
VILL	0.639322	0.210584	0.409901
NR4A3	0.63886	0.0171064	0.104423
BTK	0.637607	0.0426077	0.166156
ATP6V0C	0.637208	0.0810062	0.2355
HLX	0.636106	0.0235833	0.123278
MRPL33	0.635841	0.00260012	0.0465215
TMEM136	0.635014	0.0690757	0.215742
SPATC1L	0.634619	0.0420678	0.164927
MFSD3	0.634479	0.00769029	0.0740791
MARK1	0.634102	0.0172136	0.104541
CBX4	0.633914	0.0174492	0.105544
HAGHL	0.633821	0.128199	0.3074
C22orf39	0.633793	0.126167	0.304917
ZHX2	0.633657	0.0308236	0.139866
MT1X	0.63343	0.00103044	0.0333173
SHARPIN	0.633339	0.00740248	0.0727218
HSBP1L1	0.632807	0.0839492	0.241003
CTC1	0.63269	0.0142321	0.0956876
ZDHHC1	0.632017	0.0108878	0.08466
C9orf142	0.631847	0.027761	0.13285
CASP9	0.631414	0.0065011	0.0695592
RAB11FIP3	0.631245	0.0215859	0.117253
S100A4	0.631072	0.0161762	0.101715
FAM210B	0.629788	0.00287969	0.0482672
DAP	0.629343	0.00348307	0.0529075
SULT1A1	0.629034	0.00373363	0.0536833
SBNO2	0.628947	0.0312454	0.14103
PXK	0.628452	0.033691	0.145888
USF2	0.628409	0.0141896	0.0955859
MAST1	0.628007	0.0165964	0.102889
CADPS	0.626388	0.0399811	0.160462
IL1R2	0.626021	0.0980968	0.264383
DDB2	0.625325	0.00266253	0.0467043
BIN1	0.62525	0.057691	0.19537
HABP4	0.625123	0.0195157	0.111531
GALNT11	0.624582	0.0141705	0.0955859
CNRIP1	0.624372	0.00551047	0.0636321
SMDT1	0.624288	0.0129847	0.0920463
LINC00116	0.624159	0.00219761	0.0435652
TMEM251	0.623811	0.00140044	0.0360083
POLB	0.623321	0.0153408	0.0991749
C1QTNF3	0.623255	0.00398681	0.0560407
AIFM2	0.622915	0.00183721	0.0404525
MMEL1	0.622534	0.141293	0.324802
EXT2	0.622342	0.00869619	0.0781464
KIAA1024	0.62215	0.00121074	0.0349079
TOP3B	0.621595	0.395645	0.600719
SPATA20	0.621592	0.0048872	0.0609784
MCAM	0.620809	0.00262813	0.0465344
ABCG5	0.620465	0.00877055	0.0784028
ZNF213	0.620041	0.0610565	0.202263
LIMA1	0.619932	0.00235787	0.044383
COA3	0.619657	0.00485961	0.0609784
MFSD12	0.619167	0.00572605	0.0648953
TAS2R14	0.619144	0.0146893	0.0972758
HTATIP2	0.617668	0.004806	0.0605648
ALG1	0.616267	0.0132492	0.0927884
PSENEN	0.615706	0.00295872	0.0488376
SMPD1	0.61568	0.00703045	0.0714245
C8orf46	0.615147	0.0167568	0.103366
C19orf43	0.614975	0.0202421	0.113237
NDUFAF3	0.614772	0.0136128	0.0937758
METRNL	0.614714	0.0553389	0.1922
MYLPF	0.614647	0.0272957	0.131932
C16orf95	0.613702	0.0190952	0.110301
SDF2L1	0.613514	0.137247	0.319543
NHSL1	0.613279	0.00941546	0.080219
TP53I3	0.613141	0.015814	0.100707
FUOM	0.612952	0.0742113	0.225009
SLC24A5	0.612444	0.00435469	0.0580658
ZNF558	0.612238	0.0456514	0.173308
KCTD1	0.611334	0.0971096	0.26291
MYEOV	0.611274	0.0102217	0.0830194
TMEM171	0.611024	0.16749	0.358342
P2RX7	0.610987	0.00228618	0.0442911
ATP6V0E2	0.610905	0.0126119	0.0911166
TSNARE1	0.610753	0.0175207	0.10587
TSACC	0.610386	0.0334117	0.145187
GSTO1	0.610384	0.00426205	0.0574727
DGAT1	0.610245	0.0473368	0.176095
PXN	0.609998	0.00198024	0.041606
CENPH	0.609353	0.0458723	0.173384
DOK5	0.608867	0.0883871	0.248718
KLC2	0.608758	0.135861	0.317479
RNASE6	0.608134	0.232505	0.434357
ZCCHC4	0.608127	0.0271011	0.131527
GLRX5	0.608109	0.0256904	0.127959
NME3	0.607963	0.199273	0.39679
ROPN1	0.607302	0.0076618	0.0739949
ALG2	0.607221	0.010706	0.0845785
C10orf35	0.607152	0.15876	0.347768
CSAG2	0.607103	0.0533013	0.187695
RTKN	0.607003	0.00852035	0.0775847
LRRC6	0.606979	0.00884433	0.0785491
INTS10	0.606614	0.0257895	0.128291
PHLDB1	0.606553	0.0115156	0.0867046
ATF7IP2	0.606545	0.0663368	0.210954
SLC39A3	0.606346	0.0346179	0.148805
EHD1	0.605649	0.0242273	0.125042
IMMP2L	0.605431	0.00870258	0.0781464
NBDY	0.605177	0.00316668	0.0503211
SLC35G2	0.605068	0.00424916	0.0574287
SLC35C1	0.604912	0.0485252	0.179066
NPEPL1	0.604707	0.0234827	0.122914
PRKAR1B	0.604659	0.00277023	0.0474142
TMEM53	0.604249	0.00153501	0.0369435
RNF144B	0.60332	0.00461988	0.0597331
TMEM126A	0.603032	0.00326472	0.0513322
GNPTG	0.601683	0.054851	0.191122
ABCC4	0.601459	0.0445687	0.170859
HOXD9	0.601277	0.0956623	0.260528
FBXW9	0.600978	0.101378	0.269453
TCEAL1	0.600708	0.0209665	0.115253
SIAE	0.600642	0.00906759	0.079393
FAM89A	0.600486	0.00766982	0.0739949
FAM174B	0.600038	0.00742818	0.0727218
SMAP1	0.60002	0.211858	0.411376
SLC9A3R1	0.599973	0.00843536	0.077239
FBXO9	0.599648	0.0102	0.0830194
LRRIQ3	0.599286	0.0195285	0.111531
YDJC	0.59919	0.047258	0.176023
FLNA	0.598713	0.0148563	0.0977907
VGF	0.598099	0.108993	0.280579
CPEB1	0.597642	0.0108264	0.0845964
CA11	0.597566	0.143373	0.328032
CCDC61	0.597284	0.0842827	0.241554
PRNP	0.596747	0.00292177	0.0487669
CLCN7	0.595937	0.0134532	0.0934037
TAPT1	0.595605	0.180753	0.375672
CFHR3	0.595135	0.0294065	0.136233
FDX2	0.595047	0.0034879	0.0529075
EFCAB2	0.594669	0.010877	0.08466
SYCE1L	0.593668	0.154423	0.34267
GNB1L	0.593614	0.0436292	0.168666
TMEM30A	0.593462	0.011269	0.0858776
AKIRIN2	0.591709	0.0716349	0.220276
ADGRE5	0.591539	0.013429	0.0934037
DALRD3	0.59148	0.0236526	0.123586
ADRA2A	0.591184	0.0135352	0.0935315
E2F4	0.591013	0.0278571	0.132925
SLC38A10	0.59079	0.00209587	0.0427558
TUFM	0.589719	0.019243	0.11094
POLL	0.58967	0.014989	0.0979619
TMEM243	0.588964	0.0446432	0.171089
NEK6	0.588745	0.0131797	0.0925762
LINGO2	0.588694	0.0299915	0.137707
ALKBH6	0.588429	0.0312129	0.140936
RPP38	0.588273	0.00715507	0.0718242
CCDC137	0.58808	0.0700678	0.217607
DDT	0.587424	0.0948632	0.259461
ALLC	0.587333	0.187593	0.383279
KCNN4	0.58721	0.119239	0.295413
DOCK10	0.586998	0.0125567	0.0909639
LYG2	0.586846	0.179516	0.373816
C10orf11	0.586447	0.0106716	0.0845727
DNTTIP1	0.585987	0.0061974	0.0677287
LRCH2	0.585859	0.0992034	0.266342
ITGB5	0.585791	0.00230657	0.044383
ARMC6	0.585284	0.00806583	0.0757934
DDX54	0.585134	0.0950818	0.259539
AGT	0.585118	0.0529812	0.187064
SLIRP	0.585057	0.00466558	0.0598699
IGFBP7	0.585003	0.0240873	0.124656
BLCAP	0.58484	0.0173033	0.104874
OR4A16	0.584823	0.410792	0.613566
SORCS1	0.584808	0.0699892	0.217607
HOXB7	0.584657	0.00590411	0.0658502
URM1	0.584501	0.00166184	0.0383606
ATG2A	0.583612	0.123393	0.301339
CCDC141	0.583547	0.0401025	0.160699
KDELC1	0.583526	0.0133433	0.0932094
IL20	0.583379	0.391722	0.597161
EGF	0.582251	0.0796879	0.233073
MON1A	0.58224	0.0252992	0.126858
TRPM8	0.582112	0.00886962	0.0786293
MAGEF1	0.582075	0.0279157	0.133099
DDX20	0.582003	0.0194843	0.111531
BLOC1S4	0.580724	0.115801	0.290025
LCMT2	0.580348	0.0410104	0.163031
BBIP1	0.579719	0.014892	0.0979132
BLVRB	0.579622	0.019852	0.112335
DTYMK	0.579466	0.0626057	0.205427
FRMD8	0.57937	0.0126716	0.0913876
GNG5	0.579065	0.0104428	0.0834165
FMO4	0.578916	0.01023	0.0830194
LPAR4	0.578862	0.014301	0.0958904
PSMD3	0.5781	0.0131621	0.0925068
PIGV	0.577788	0.0521773	0.186042
VPS4A	0.57772	0.0212333	0.115918
CDK2AP1	0.577603	0.0135193	0.0935315
RPUSD2	0.577432	0.0867275	0.24532
CHURC1	0.577314	0.00270454	0.047117
SLC47A1	0.577189	0.15577	0.344571
CHKB	0.577101	0.0119219	0.0881394
SMPD2	0.576224	0.280324	0.486602
PDGFRL	0.576007	0.0190082	0.110118
TMEM179B	0.574395	0.00627333	0.0682461
ELL	0.574107	0.0559328	0.192777
MROH8	0.574	0.141487	0.324963
SMIM3	0.573861	0.240094	0.441667
AAED1	0.573844	0.0189517	0.109951
FTCDNL1	0.573731	0.161697	0.351574
KATNB1	0.573678	0.00393564	0.0556493
MED22	0.573638	0.013578	0.0936106
RGS14	0.573143	0.123468	0.301339
UCHL3	0.572402	0.00731692	0.0725251
CASP4	0.572173	0.0148977	0.0979132
SHKBP1	0.572074	0.0827816	0.2388
BOLA3	0.571929	0.00208795	0.0427413
TMEM129	0.571756	0.0136841	0.0938704
TMEM255A	0.57164	0.0232712	0.122291
TXNRD3	0.57126	0.115574	0.289912
HOXA11	0.5708	0.193178	0.390544
SLC25A4	0.570406	0.0367982	0.15364
ATP5G1	0.570382	0.00240608	0.0449361
CDKN2B	0.57023	0.0763223	0.227571
RPL22L1	0.569793	0.0117734	0.0875411
GATSL3	0.569491	0.231991	0.433607
CLPP	0.569422	0.054722	0.190951
RHOQ	0.568366	0.00722298	0.0721331
ARHGDIG	0.567803	0.0452661	0.1727
TMEM208	0.567673	0.0149492	0.0979132
RWDD1	0.567566	0.00711233	0.0718242
TPK1	0.567427	0.0264149	0.129887
SPINK7	0.566644	0.505086	0.688471
ATP5E	0.566625	0.00229131	0.0443184
UBALD2	0.566284	0.00825153	0.0763362
FAM222A	0.566119	0.0626575	0.205428
PLEKHB1	0.56539	0.0181393	0.107597
REEP4	0.565027	0.0112473	0.0857696
PLSCR3	0.564955	0.0648621	0.209433
ZNF362	0.564831	0.0659913	0.210634
RAB11FIP2	0.564536	0.044206	0.169975
SNX21	0.564276	0.105879	0.276098
TNS2	0.563987	0.0268485	0.130927
LETM1	0.563551	0.0101765	0.0830194
CYB5R3	0.563364	0.0239382	0.124355
LINC00493	0.563256	0.0103138	0.0831411
MAP3K12	0.563119	0.0989382	0.266017
NFKBIA	0.563026	0.0400056	0.160462
FNDC10	0.56266	0.0151705	0.0984472
PHACTR3	0.562589	0.083468	0.240029
CSPG4	0.562587	0.00331495	0.0515951
LRRC8B	0.562249	0.00647841	0.0694639
PCDHB10	0.562134	0.346009	0.552707
TOPORS	0.561523	0.0363287	0.152604
PNMA1	0.561323	0.0262908	0.129507
TRAF1	0.560978	0.0358288	0.151356
POLE4	0.560904	0.0349578	0.149532
PHF11	0.560253	0.143232	0.327772
ZSWIM7	0.559935	0.00513826	0.0616901
MTFMT	0.559866	0.156	0.344743
PAGE5	0.558973	0.0622868	0.204831
NGRN	0.558824	0.0218291	0.117984
PSKH1	0.558711	0.0261705	0.129385
CAPNS1	0.55871	0.00659157	0.0695927
HAPLN3	0.558523	0.00709	0.0718242
APOLD1	0.558184	0.0800557	0.233627
TSPAN9	0.558145	0.0189478	0.109951
BST1	0.558102	0.192961	0.39037
CTNNBIP1	0.557989	0.054499	0.19034
PIAS4	0.557341	0.065063	0.209624
HIBCH	0.557263	0.00303059	0.0493411
HIBADH	0.557235	0.0162125	0.101725
BAAT	0.556979	0.00359249	0.0531921
CTU2	0.556745	0.0364703	0.152929
TMEM167A	0.556317	0.00449192	0.0585864
TBL1Y	0.556294	0.0891969	0.249912
TXNDC17	0.556251	0.0043792	0.0581031
SYNM	0.556063	0.0566491	0.193781
SLC10A7	0.556039	0.0792586	0.232287
RTN4RL1	0.555963	0.0522739	0.186177
HIST1H2BD	0.555902	0.020688	0.11462
LEMD2	0.555856	0.130113	0.309672
FAM161B	0.555832	0.322795	0.529808
NAXE	0.555827	0.040418	0.161429
DNAL1	0.555493	0.0380581	0.156131
SF3A2	0.554677	0.068809	0.215134
C1orf228	0.55453	0.0964773	0.261911
ATP6AP2	0.55443	0.0111574	0.0853757
ASB2	0.554161	0.0582684	0.196185
SLC12A9	0.553313	0.0429969	0.167087
ARIH2OS	0.552737	0.102728	0.271471
ZNF576	0.552181	0.0202204	0.113185
CNOT11	0.551897	0.0738676	0.224138
HDAC7	0.551816	0.101314	0.269343
SPPL3	0.551609	0.0560717	0.192777
FADS3	0.551057	0.19884	0.396351
FLYWCH1	0.550299	0.0664189	0.210978
GADD45A	0.550054	0.13595	0.317535
MAP1LC3B	0.549995	0.0653482	0.210016
TNFSF10	0.549797	0.249852	0.453151
KEAP1	0.549775	0.067394	0.212682
TELO2	0.549658	0.146882	0.332806
PON2	0.549622	0.0423235	0.165332
RALGDS	0.548966	0.00971759	0.0813134
CWF19L1	0.548633	0.0116035	0.0869578
SHC1	0.548514	0.0101139	0.0827838
SEM1	0.548449	0.00217921	0.0435624
CD33	0.548231	0.193321	0.39057
ARMCX2	0.548218	0.216504	0.416154
SEC24D	0.548112	0.0170803	0.104423
KCNN3	0.548022	0.00775621	0.0744671
NDUFA3	0.547047	0.00251118	0.0461763
BCL7B	0.546864	0.034928	0.149532
SCRN1	0.5468	0.030695	0.139601
ST20	0.546645	0.0786005	0.231153
ARPC2	0.546644	0.0212607	0.115962
MKKS	0.546128	0.00557309	0.0639302
GRASP	0.545931	0.0166187	0.102917
SULT1A2	0.545796	0.0250772	0.126665
F3	0.545642	0.0675502	0.212984
SMIM19	0.545627	0.00931457	0.080219
ERBB2	0.54544	0.110596	0.282865
MTHFS	0.545407	0.0495437	0.181311
ATXN7L3	0.545401	0.103398	0.272335
PPM1M	0.545138	0.427303	0.628707
BAHD1	0.544584	0.0547938	0.191054
CERS4	0.54423	0.277286	0.482945
MYCBP	0.543627	0.00738586	0.0727218
KIF9	0.54348	0.01261	0.0911166
COPZ2	0.543331	0.004083	0.0565273
TANGO2	0.543145	0.0115285	0.0867473
AFAP1L2	0.54259	0.0258257	0.128345
NMNAT1	0.54238	0.113821	0.287236
TBX19	0.542322	0.187925	0.38376
FCMR	0.541982	0.00992747	0.0821351
ZDHHC16	0.541958	0.180197	0.374908
MCF2L	0.541795	0.00681302	0.07064
FHL3	0.541104	0.0117716	0.0875411
WDR5B	0.540919	0.0122842	0.0897925
MAGED2	0.540756	0.00284742	0.0479959
ALOX15B	0.540492	0.302016	0.509797
FBXW4	0.540345	0.108486	0.279928
GJB1	0.540335	0.0042372	0.0573319
HELQ	0.540328	0.031622	0.141889
TM7SF3	0.540026	0.00938368	0.080219
ARL6IP5	0.53873	0.00379939	0.0542367
ORAI2	0.538659	0.00824792	0.0763362
ITGA10	0.5386	0.172169	0.365144
ATPIF1	0.538589	0.00567439	0.0646569
CHFR	0.538554	0.00968173	0.0812069
CYSRT1	0.538527	0.0542118	0.189559
TIMM50	0.538183	0.068044	0.213922
USP12	0.53805	0.0422011	0.165122
HDHD3	0.537983	0.018921	0.10994
IMMP1L	0.537633	0.00852301	0.0775847
PSMB2	0.537558	0.00311918	0.0499755
UPK1A	0.536873	0.0352432	0.14973
PODXL2	0.536843	0.0588308	0.197548
NRXN3	0.53657	0.00937701	0.080219
TWIST1	0.536057	0.0826164	0.238381
MYO1B	0.535902	0.0245217	0.125597
COX6C	0.53537	0.00372386	0.0536474
GLYCTK	0.53528	0.0497738	0.181596
RANBP1	0.535215	0.147479	0.333613
NCK2	0.535133	0.0229181	0.121557
C11orf84	0.535082	0.0443803	0.170355
YY2	0.535028	0.017222	0.104541
MFSD11	0.534966	0.0145386	0.0966591
DAND5	0.534747	0.35293	0.559567
DPH1	0.534254	0.122335	0.299969
TRAM2	0.534143	0.00500475	0.0609784
CCDC92	0.534101	0.00941354	0.080219
ROM1	0.533947	0.135052	0.316331
UQCRC1	0.53381	0.0642158	0.208021
MS4A8	0.533296	0.0662885	0.210954
GRAMD3	0.533148	0.0388199	0.157792
KLHL29	0.532877	0.138079	0.320767
ACYP1	0.532848	0.00673506	0.0701975
KCNE4	0.532647	0.131412	0.311581
BAALC	0.532631	0.0828133	0.238834
RBP5	0.53263	0.380753	0.586841
ARF5	0.532629	0.0288284	0.134806
CPA2	0.532494	0.402279	0.606851
CARMIL1	0.532367	0.0331572	0.144679
MRPS12	0.532093	0.0098205	0.081842
DAB2	0.531775	0.010432	0.0834026
ST8SIA1	0.53158	0.00736954	0.0727218
MT1F	0.531559	0.276737	0.48234
SURF4	0.530892	0.0141774	0.0955859
DRAM1	0.530715	0.00692705	0.0711347
HHEX	0.530586	0.120649	0.297731
PPP1R3B	0.530302	0.0389055	0.15796
PARD6G	0.530294	0.0221428	0.11914
TSPAN7	0.530176	0.022047	0.118807
HAS2	0.529731	0.256586	0.460605
MRPL36	0.529233	0.00847506	0.0773843
MORN2	0.529119	0.00353029	0.0529075
NAP1L5	0.529073	0.0345229	0.14862
TMEM214	0.528943	0.0508597	0.183816
GALNS	0.528559	0.0210986	0.11551
FES	0.528511	0.00724875	0.0722092
YKT6	0.528258	0.00707379	0.0717236
AHCYL2	0.528076	0.0700974	0.217607
ST3GAL4	0.527898	0.0330248	0.144595
ADAM23	0.527867	0.181086	0.375936
FSTL3	0.52726	0.206003	0.404995
PPP1R12C	0.527204	0.125945	0.304626
ZNF512B	0.527119	0.0998469	0.267205
PCBP4	0.527073	0.0337439	0.146064
S100A3	0.526737	0.0285765	0.134476
TMEM9B	0.526597	0.00501474	0.0609784
C15orf39	0.5263	0.0581414	0.19595
COMMD6	0.52625	0.0115446	0.0867586
SULF1	0.526152	0.0486546	0.179322
HPS6	0.526046	0.0726568	0.221988
NDUFS5	0.525943	0.00545887	0.0633718
BCL2L1	0.525798	0.0229821	0.121735
CARF	0.525707	0.0342573	0.147591
ASPSCR1	0.525628	0.0782373	0.230537
TBXAS1	0.525521	0.0791409	0.232147
ARMC5	0.524971	0.0903224	0.25226
STRADB	0.524395	0.028034	0.133332
RAB3IL1	0.524293	0.167469	0.358342
FPGS	0.524095	0.0398992	0.160462
TIMP1	0.524043	0.00998596	0.082306
IFRD2	0.524037	0.0399623	0.160462
PSMB6	0.52343	0.00352907	0.0529075
CPT2	0.523362	0.0459595	0.173468
MAF1	0.523068	0.0187022	0.109441
MKRN1	0.522995	0.0161814	0.101715
AARD	0.522965	0.0264497	0.129985
PALM2	0.522805	0.171252	0.363979
NAV3	0.522638	0.0976586	0.263724
PLXNB3	0.522141	0.021286	0.115994
ACCS	0.522137	0.0102488	0.0830194
NDUFB3	0.521791	0.0136895	0.0938704
GYS1	0.521728	0.0593692	0.19863
GORASP2	0.521258	0.0111555	0.0853757
AGPAT2	0.52121	0.0451981	0.172496
ZGPAT	0.520996	0.00537446	0.0630047
WHAMM	0.520656	0.0597071	0.199205
BCKDHB	0.520581	0.010915	0.0847494
GREB1	0.520357	0.00491041	0.0609784
REXO2	0.520347	0.00988833	0.0821099
RPP25L	0.520056	0.0108315	0.0845964
STRN4	0.519129	0.0515899	0.184998
PSMB5	0.519101	0.00420428	0.0571877
SCARB2	0.518824	0.0167772	0.103366
RBPMS	0.518742	0.0101771	0.0830194
ARFGEF1	0.518387	0.0124212	0.0904117
PET100	0.518302	0.0314981	0.141558
TCIRG1	0.518267	0.154892	0.3432
TBCEL	0.518077	0.0727423	0.222028
UBE2U	0.518	0.0519795	0.18567
HSPE1	0.517958	0.00476965	0.0604004
ZNRF1	0.517508	0.0627036	0.205428
PKIG	0.517452	0.012781	0.0917738
CHST11	0.517443	0.00780259	0.0746896
CENPT	0.517409	0.0985949	0.265425
FXN	0.517276	0.227996	0.429774
FAM219B	0.517126	0.0661301	0.210902
BANP	0.517058	0.0271303	0.131615
TMEM67	0.516446	0.115596	0.289912
PLEKHM2	0.516195	0.0318653	0.142016
FAM118A	0.515988	0.0713807	0.220118
MNT	0.515864	0.127573	0.306562
C11orf70	0.515456	0.103563	0.27265
C6orf226	0.515416	0.0187027	0.109441
MFSD1	0.515319	0.0908294	0.253134
A2M	0.515231	0.109537	0.281484
RAI1	0.515176	0.0633513	0.20656
PHLDA2	0.514569	0.0136255	0.0937758
C19orf12	0.514208	0.0865726	0.245114
LRRFIP2	0.514118	0.00771329	0.0741744
PCBD2	0.513644	0.0430284	0.167155
FKBP7	0.513374	0.0263068	0.129516
ZNF771	0.512803	0.0329342	0.144511
BGLAP	0.512538	0.0743952	0.225083
ABHD17C	0.512118	0.0620284	0.204206
REEP6	0.511964	0.114937	0.289197
ARPC5L	0.511755	0.0666941	0.211476
ITPKB	0.5117	0.0485963	0.179218
COX17	0.511679	0.00515203	0.0617044
EIF5A	0.51143	0.0814371	0.236465
MFAP2	0.511301	0.178661	0.372688
SHISA4	0.510872	0.0151189	0.0983267
PRICKLE3	0.510871	0.117145	0.292105
STAT2	0.510725	0.0155149	0.0996984
E4F1	0.510319	0.0200516	0.112928
RAB4A	0.510316	0.0291439	0.135627
TMEM159	0.509977	0.0186625	0.109337
CDKN1A	0.509973	0.00621517	0.0677988
FLYWCH2	0.509512	0.0164644	0.102346
TP53RK	0.509196	0.109526	0.281484
EP400NL	0.508978	0.018593	0.109105
PITPNC1	0.50896	0.10522	0.275372
SUMF1	0.508915	0.083469	0.240029
CARD8	0.508539	0.133378	0.314772
THSD4	0.508215	0.0280474	0.133332
ZNF443	0.507808	0.0589994	0.197892
EVI2A	0.507177	0.145113	0.330491
TRAPPC2B	0.506999	0.0200134	0.112767
HMGN5	0.506788	0.024478	0.125492
BTBD8	0.506555	0.0670329	0.212025
S100A10	0.506487	0.0237284	0.123765
LRRC43	0.506074	0.190658	0.387882
UTS2B	0.506063	0.239973	0.441667
CTSS	0.505975	0.0873264	0.246547
CALM3	0.505804	0.0150337	0.0981465
EFCAB5	0.505725	0.0266325	0.130153
SQSTM1	0.505497	0.083008	0.239279
PRRX1	0.505261	0.0847834	0.24229
POLR2I	0.504999	0.00861712	0.0779017
TRIOBP	0.504709	0.00520093	0.0620679
PRH1	0.504637	0.392994	0.597984
NOL6	0.504274	0.0285173	0.134251
MOXD1	0.504161	0.0406866	0.162013
NDUFB2	0.504094	0.00558197	0.0639302
MYL6	0.503985	0.0190707	0.110301
RNF150	0.503785	0.200957	0.398573
OSTM1	0.503755	0.0244679	0.125492
FAM50A	0.503713	0.0118667	0.0878522
UBE2D4	0.503578	0.0187792	0.10954
SLC35B2	0.50357	0.0274605	0.132115
CENPX	0.503521	0.0149391	0.0979132
TEN1	0.502991	0.12924	0.308779
AGAP6	0.502791	0.0296472	0.136448
TSKU	0.501871	0.10555	0.275811
UBL5	0.501736	0.0171284	0.104423
ZBED1	0.501244	0.0355883	0.150783
ATP2B1	0.501186	0.00522243	0.0621218
DBP	0.500975	0.237244	0.439171
ADRB2	0.500704	0.195583	0.393209
BDH2	0.500669	0.042618	0.166156
FAM3A	0.500463	0.0387876	0.157792
SLC25A30	0.500266	0.00937751	0.080219
FAM207A	0.500249	0.162296	0.35241
TMEM165	0.500154	0.0242456	0.125042
AFMID	0.499743	0.0782399	0.230537
AVPI1	0.499416	0.0383251	0.156951
HIST4H4	0.499306	0.0381637	0.156349
FAM109A	0.499038	0.0548408	0.191122
ITM2B	0.499014	0.00739041	0.0727218
ANKRD13D	0.498355	0.0525221	0.186421
UTP14C	0.498283	0.0560695	0.192777
NDUFA12	0.498224	0.00542791	0.0632678
LOXL4	0.497905	0.00778827	0.0746896
LDB1	0.497708	0.0359113	0.151436
UTP18	0.49725	0.0752945	0.225928
SLC9A9	0.496422	0.0561503	0.19289
RAB39B	0.496419	0.0762527	0.227459
GCSH	0.496308	0.0659406	0.210634
AGMO	0.496187	0.0279945	0.133314
PSMA5	0.496128	0.00862284	0.0779017
PRKACB	0.495955	0.074901	0.225383
USP30	0.495907	0.209518	0.408895
POLR2F	0.495547	0.0346523	0.148809
RNF157	0.495528	0.0288296	0.134806
VAMP2	0.495353	0.0265337	0.130015
UQCR10	0.494993	0.00502817	0.0609784
PPT2	0.494839	0.0365735	0.1532
EIF2AK4	0.494718	0.0350333	0.149638
GALNT7	0.494666	0.0175154	0.10587
CBR3	0.494532	0.192355	0.389669
TTC21A	0.494187	0.293923	0.501598
RTEL1	0.494062	0.0728484	0.222289
SEPHS2	0.493913	0.0473784	0.176141
NDUFA1	0.493896	0.00489518	0.0609784
NDUFAF6	0.493745	0.0181564	0.107597
CFAP53	0.493493	0.0396009	0.159931
ATP6V1F	0.493487	0.0143775	0.096178
SIM2	0.493331	0.0538742	0.18871
B9D1	0.493084	0.00415379	0.0569138
TMEM263	0.493066	0.00960507	0.0809501
MAP1S	0.493036	0.031298	0.141153
ADPRHL2	0.492827	0.124642	0.302932
DKK1	0.492767	0.101859	0.270426
PLSCR4	0.492653	0.0226134	0.120854
SMAD7	0.492539	0.0162001	0.101715
CPTP	0.492196	0.160709	0.350302
PIGQ	0.492172	0.0109245	0.0847678
TSPAN4	0.491982	0.0135587	0.0935321
CCNDBP1	0.491827	0.00557738	0.0639302
APLP1	0.491644	0.148477	0.33502
STK16	0.491551	0.14094	0.324267
IL12A	0.491502	0.317173	0.523822
ITGA9	0.49138	0.133024	0.314421
SAMD8	0.491304	0.169339	0.361067
SPRYD3	0.491226	0.0300806	0.137911
C19orf66	0.491044	0.00713296	0.0718242
NR1H2	0.49035	0.0633639	0.20656
SLC35D1	0.490335	0.0795475	0.232824
PSMB3	0.4901	0.00617096	0.0675016
CNP	0.490094	0.00481411	0.0605842
OSTF1	0.489891	0.0180951	0.107597
CTDP1	0.489329	0.106778	0.277451
PPP1R26	0.489324	0.0402488	0.160914
DGCR6	0.489246	0.137328	0.319656
BCDIN3D	0.48922	0.11002	0.282178
LGALS3	0.489069	0.00943184	0.080219
TPRKB	0.488822	0.0153537	0.0991802
NCALD	0.488625	0.1168	0.291486
TUSC3	0.488402	0.0240528	0.12464
CCDC25	0.488198	0.00505078	0.061121
EGLN3	0.487758	0.0134625	0.0934037
TBC1D7	0.48761	0.0192683	0.111032
INPP1	0.487104	0.0720528	0.220992
MYOT	0.486984	0.40064	0.6057
TMX4	0.486944	0.0121754	0.0895888
ARSJ	0.486791	0.121927	0.299214
RPS24	0.486531	0.00925912	0.0801293
PHF23	0.486515	0.00620661	0.0677674
P2RX4	0.486471	0.115597	0.289912
GAS8	0.486466	0.0270618	0.13139
NT5C3B	0.486407	0.046795	0.175448
RBKS	0.485637	0.0752989	0.225928
GABARAP	0.485582	0.00528158	0.0624681
ING2	0.48555	0.260215	0.464255
ATP5I	0.484751	0.0127282	0.0914497
DPH7	0.484416	0.00994513	0.0821351
REEP5	0.484247	0.00773473	0.0743207
CPS1	0.483974	0.31095	0.518077
PTK2B	0.483743	0.221131	0.421427
ARL8A	0.483341	0.0325682	0.143632
UBA5	0.483086	0.0322524	0.142875
SIRT4	0.483011	0.146002	0.331783
GPC1	0.482936	0.0562475	0.193001
AP1M1	0.482876	0.0663465	0.210954
PNKP	0.482587	0.0252972	0.126858
RIDA	0.482313	0.0332684	0.1449
NDUFA7	0.481951	0.00508692	0.0611968
RASSF3	0.481671	0.0330064	0.144595
DGCR2	0.481256	0.0616984	0.203682
CASKIN2	0.481207	0.0110079	0.0850833
FAM229A	0.481144	0.234255	0.435836
C12orf49	0.480965	0.0459616	0.173468
ELAC1	0.480456	0.0175346	0.1059
SNX8	0.480352	0.122844	0.300664
PLEKHO2	0.480127	0.035201	0.149657
HMOX2	0.480057	0.00643868	0.069287
SSSCA1	0.479786	0.0155025	0.0996984
IFT22	0.479551	0.0137107	0.0939079
MRAS	0.479496	0.127326	0.306457
MARCKSL1	0.479475	0.00881516	0.0785075
C14orf2	0.479111	0.0162458	0.10188
ZRSR2	0.479104	0.0171931	0.104541
HSPA2	0.479095	0.0319667	0.142228
FBXL6	0.479022	0.326167	0.53285
EIF2B1	0.478859	0.0769203	0.228293
PLA2G15	0.478694	0.0154213	0.0994109
PSMB1	0.478343	0.00651099	0.0695592
NOTCH1	0.47832	0.0661943	0.210954
PHTF1	0.47829	0.0510081	0.184043
MYLK	0.478239	0.0319836	0.142228
DHRS1	0.477903	0.0129436	0.0920463
NRBP2	0.477886	0.0718447	0.22074
NFS1	0.477511	0.162285	0.35241
ABHD16A	0.477355	0.00583588	0.0655418
PTGES2	0.47717	0.0215252	0.117031
SLC25A32	0.476827	0.044452	0.170576
MAP2K3	0.476708	0.0329449	0.144511
OGFOD2	0.476366	0.0144027	0.0962387
ESRP1	0.47634	0.0359842	0.15169
PDK2	0.476104	0.123267	0.301202
DUSP14	0.476061	0.0149075	0.0979132
SNRPN	0.476056	0.0128463	0.0920152
CTSB	0.475564	0.00615637	0.0675016
CD59	0.475426	0.00693133	0.0711347
ZPR1	0.475244	0.114237	0.288104
CHTF18	0.475219	0.110273	0.282403
ANKRD23	0.475127	0.238538	0.440339
TMEM184B	0.475044	0.0172451	0.104628
POP5	0.474558	0.00985923	0.0820502
UBD	0.474322	0.274937	0.480607
SPG21	0.474317	0.0298832	0.137322
STEAP1B	0.474263	0.0778325	0.229983
C12orf45	0.47418	0.0157687	0.100633
PCDHB2	0.474107	0.0999042	0.267205
RGL3	0.473744	0.142535	0.326678
CNN2	0.47291	0.00933981	0.080219
COQ9	0.472647	0.0191068	0.110315
MRPS17	0.472333	0.0128345	0.0920152
RASA3	0.47211	0.0685247	0.214582
SCAF1	0.471388	0.0251503	0.126665
GOSR2	0.471197	0.021035	0.115417
TMEM27	0.471038	0.458741	0.653193
XPA	0.470672	0.166759	0.357385
POLR3G	0.470111	0.0101437	0.082971
RNASEK	0.469775	0.00839233	0.0771827
FECH	0.469643	0.0568177	0.194065
HSPH1	0.469636	0.0175677	0.106032
NUDT19	0.469452	0.02272	0.121153
SGCG	0.469144	0.278702	0.484844
RPS12	0.469044	0.013089	0.0922992
GMDS	0.468677	0.185591	0.380919
PARP10	0.468345	0.292281	0.50006
TRMO	0.468302	0.123421	0.301339
CTNS	0.468127	0.225297	0.426168
DUSP18	0.468067	0.156718	0.345451
STX18	0.468058	0.10614	0.276506
ACTN1	0.467938	0.0108758	0.08466
ACAD8	0.467848	0.0612753	0.202677
FAH	0.467413	0.0105697	0.0842612
BTBD2	0.467311	0.175199	0.368753
ZFYVE21	0.46715	0.0627094	0.205428
ZNF783	0.466908	0.153331	0.34139
MPHOSPH6	0.466799	0.0129201	0.0920463
CHMP4B	0.466594	0.0129851	0.0920463
NDUFB9	0.466577	0.00750023	0.073176
TOP1MT	0.466233	0.0860544	0.244285
POLD1	0.466228	0.161989	0.351999
ARSD	0.466136	0.0821702	0.237759
NDUFAF2	0.465953	0.0379593	0.155886
THOC3	0.465777	0.191934	0.389549
ZSCAN16	0.465415	0.231715	0.433262
TTLL7	0.464862	0.255393	0.459206
DENND5B	0.464748	0.0644914	0.208688
LARS2	0.464686	0.0242362	0.125042
NME5	0.464534	0.0301431	0.138038
ATP13A2	0.464457	0.110447	0.282666
PPFIBP1	0.464432	0.00758465	0.0737094
SRGN	0.464253	0.0186086	0.109127
CLDN1	0.46422	0.0159558	0.101178
H1FX	0.463499	0.0523501	0.186242
PPP2CA	0.463434	0.0490953	0.180389
PIDD1	0.463189	0.0869828	0.245926
CREB3	0.462781	0.0125615	0.0909639
MRPS30	0.462766	0.055146	0.191784
ADPRM	0.462754	0.139184	0.322091
MRPS33	0.462733	0.0187469	0.10954
WFDC2	0.462557	0.116754	0.291434
ECE1	0.462364	0.0404362	0.161447
ZZEF1	0.46212	0.0577549	0.195467
PSMD2	0.461941	0.00868581	0.0781464
ZCCHC24	0.46183	0.0412948	0.163672
CCDC146	0.4618	0.0748759	0.225383
GRWD1	0.461387	0.0457873	0.173384
SCLY	0.461293	0.19296	0.39037
PTRH1	0.460849	0.0654061	0.210016
SPRY4	0.460775	0.0226758	0.12108
RHBDF1	0.460597	0.237641	0.439662
FAM155B	0.460303	0.257647	0.462022
TMOD2	0.460113	0.0106323	0.084493
RSG1	0.459924	0.24434	0.446547
IDS	0.459912	0.0217482	0.11776
NDUFB6	0.459436	0.0134608	0.0934037
ITGA5	0.459349	0.129747	0.309185
ENTPD7	0.459314	0.158313	0.347313
NELFA	0.458547	0.031061	0.140598
YARS2	0.458419	0.115652	0.289912
MRPL34	0.458401	0.0179688	0.10722
CAB39L	0.458287	0.0133786	0.0933139
ZYX	0.457968	0.0738542	0.224138
COL4A3BP	0.457866	0.013143	0.0924536
RABAC1	0.457691	0.0351233	0.149657
RPS26	0.457396	0.00659913	0.0695927
SPOUT1	0.457017	0.00917513	0.0798076
PHKA1	0.456558	0.207583	0.406848
ST8SIA2	0.456492	0.0499392	0.181994
NUMBL	0.456185	0.330954	0.536673
COX20	0.456113	0.0513788	0.18463
ZNF781	0.455623	0.375452	0.581826
CHMP6	0.455302	0.0509927	0.184043
RHEB	0.454993	0.167672	0.358561
AP1S2	0.454981	0.0166426	0.102961
C7orf31	0.454973	0.0312649	0.141064
GALNT1	0.454972	0.0251128	0.126665
IGSF8	0.454514	0.0589973	0.197892
C12orf57	0.454504	0.0114089	0.0862928
PSMD13	0.454215	0.0232715	0.122291
CAPN1	0.454153	0.0239275	0.124355
NDUFAB1	0.453991	0.0669259	0.21181
GLA	0.453612	0.0156508	0.100149
LSR	0.453205	0.0785071	0.230935
SPAG8	0.452881	0.24619	0.448599
TSPAN13	0.45288	0.0782562	0.230537
NME2	0.452681	0.034546	0.14862
ATXN7L1	0.452133	0.0429548	0.166978
CSRNP3	0.452084	0.0394139	0.159554
DHX30	0.452009	0.0674668	0.212777
SEC11C	0.451707	0.0451848	0.172496
TMEM55A	0.451704	0.00890633	0.0786642
RING1	0.451391	0.0190176	0.110119
BTD	0.450893	0.0235193	0.122997
HINT1	0.450738	0.0257983	0.128291
C7orf49	0.450697	0.0110542	0.0852752
ITFG1	0.45047	0.025151	0.126665
NCDN	0.450368	0.0950298	0.259539
C11orf98	0.45017	0.016985	0.104162
FAM86C1	0.449767	0.13523	0.316563
BLOC1S2	0.44968	0.00782429	0.0746896
UBE2L3	0.449431	0.00710354	0.0718242
RGS20	0.449371	0.0149306	0.0979132
FAM200B	0.449344	0.0120503	0.0888255
OSCP1	0.44901	0.0199231	0.11263
CCDC88B	0.448197	0.0972828	0.26314
CHN2	0.448143	0.0107831	0.0845785
COX5B	0.448123	0.0201363	0.113072
YIF1A	0.447985	0.0576367	0.195316
IRGQ	0.447589	0.0197813	0.112172
AKAP7	0.447434	0.0187799	0.10954
FTH1	0.447386	0.267709	0.47272
NDUFB4	0.447312	0.00769097	0.0740791
PDE3B	0.447285	0.0115007	0.086702
BMP1	0.447094	0.134459	0.315935
TRPM1	0.446978	0.0856606	0.243571
ZNF578	0.446949	0.171254	0.363979
TMSB4Y	0.446749	0.172264	0.365195
SIGMAR1	0.446359	0.0936584	0.25742
HMGCL	0.446251	0.00712157	0.0718242
PPP1R12B	0.445792	0.0399212	0.160462
TMEM42	0.445522	0.027456	0.132115
TNFSF9	0.445284	0.0999175	0.267205
PLEKHA4	0.445004	0.0207541	0.114789
COX10	0.444472	0.139704	0.322942
SPHK1	0.44445	0.0950055	0.259539
EPHB1	0.444427	0.166738	0.357385
ACOT8	0.444327	0.00856835	0.0778372
PIM3	0.443786	0.0464464	0.17461
DOCK11	0.44365	0.102518	0.27112
LIMK2	0.443583	0.0592958	0.198551
SETD6	0.443483	0.239941	0.441667
COQ6	0.44286	0.0321935	0.142767
CRLS1	0.442679	0.0167728	0.103366
TMEM101	0.442624	0.116967	0.291721
WDR34	0.442583	0.108031	0.27936
SH3KBP1	0.442501	0.00887495	0.0786293
TRIM47	0.442366	0.0859009	0.243965
NDUFC2	0.442342	0.00976442	0.0816026
BORCS7	0.442109	0.104368	0.274042
DUS4L	0.442021	0.0754645	0.226171
TIPRL	0.441733	0.0126207	0.0911166
POLRMT	0.441242	0.0867154	0.24532
SCAP	0.440636	0.0280097	0.133332
GOLGA7B	0.440378	0.145661	0.331464
AGPS	0.439796	0.027499	0.132115
NFIC	0.439724	0.0394566	0.159673
PTPN1	0.439543	0.00811651	0.0758987
RAB2A	0.439036	0.0379453	0.155883
WBSCR27	0.43896	0.216458	0.416154
CLMP	0.438843	0.199756	0.396991
PIGP	0.438631	0.0205559	0.114288
ZNHIT1	0.438399	0.0141788	0.0955859
DGKI	0.438234	0.168585	0.360168
TRPM3	0.438204	0.0570544	0.194317
CNPPD1	0.438172	0.0320266	0.142296
DNAJC15	0.43694	0.0163623	0.102181
SWAP70	0.436741	0.0103097	0.0831411
CXCL16	0.43664	0.137499	0.319921
FARS2	0.436601	0.0555722	0.192399
PTPRZ1	0.436303	0.0203612	0.113629
AGK	0.436179	0.0603724	0.200739
C14orf159	0.436085	0.168627	0.360192
MBD3	0.435865	0.0153585	0.0991802
CPPED1	0.43584	0.026144	0.129385
RNASEH2B	0.435507	0.0193934	0.111484
TIGD4	0.435479	0.438469	0.637666
SNRPF	0.434999	0.0104273	0.0834026
MCTS1	0.434954	0.0144528	0.0964425
C17orf62	0.434926	0.0178584	0.106775
U2AF2	0.434812	0.056682	0.193781
APOM	0.434798	0.171391	0.364141
SMARCB1	0.434419	0.175573	0.369279
ATL1	0.434381	0.196306	0.393551
DTWD1	0.434332	0.0292149	0.135714
ATXN1	0.434264	0.0317688	0.142016
RPS6KB2	0.434255	0.0228158	0.121273
MICALL2	0.434112	0.085482	0.243323
PPP1R2	0.433908	0.104685	0.274575
SLC25A14	0.433892	0.110577	0.282865
PTDSS2	0.433891	0.0855961	0.243449
CD55	0.433855	0.0564717	0.193548
TGFBR2	0.433816	0.0378476	0.155718
PEX16	0.43337	0.0181349	0.107597
APBB3	0.432986	0.0667639	0.211529
LZTS2	0.432956	0.140215	0.323395
SF3B5	0.432804	0.0278107	0.132864
LIMS2	0.43273	0.12862	0.308082
GUK1	0.432691	0.105425	0.275723
SKA2	0.43253	0.0377433	0.155535
PPP1R36	0.432393	0.267853	0.472793
GNG7	0.432345	0.00893365	0.0787401
ASB14	0.431687	0.02081	0.114816
APOBEC3C	0.431605	0.0331108	0.144679
HGS	0.430568	0.142835	0.327115
DHRS7B	0.430266	0.0138083	0.0940571
COMT	0.429977	0.0154273	0.0994109
CMC1	0.429945	0.0410443	0.163057
MYO9B	0.429785	0.0157013	0.10031
RPS29	0.429749	0.0287734	0.134806
BBC3	0.429535	0.0579995	0.195665
SCYL1	0.429109	0.0368072	0.15364
ETHE1	0.429054	0.0673612	0.212682
ITFG2	0.428549	0.118834	0.294897
PGAP2	0.428306	0.0484762	0.179013
RANGRF	0.428274	0.011662	0.0870926
CCL20	0.4282	0.176179	0.369901
WBP4	0.428127	0.0189313	0.10994
AQP1	0.428104	0.113775	0.287236
MRPL38	0.428084	0.111498	0.284311
MAD2L2	0.427799	0.0756861	0.226659
METTL9	0.427318	0.011984	0.0884461
RAB43	0.427303	0.0110742	0.0853189
NAB2	0.427289	0.155628	0.344384
SCUBE2	0.427247	0.0974032	0.263346
EXOC6B	0.427089	0.155429	0.344135
ECHDC3	0.426925	0.173158	0.36633
FAHD1	0.426791	0.0115587	0.0868099
FAM177A1	0.426638	0.0164897	0.102441
UBE2E2	0.426555	0.130164	0.309686
STN1	0.42653	0.102964	0.271971
ITGB3	0.426468	0.03182	0.142016
HOXC8	0.426413	0.293418	0.501095
ATP5J2	0.426348	0.0157402	0.100505
UNC119B	0.426213	0.29759	0.505399
SMAP2	0.4261	0.0961058	0.261428
ZNFX1	0.425851	0.0201752	0.113091
HERC5	0.425846	0.0227459	0.12116
KLHL41	0.425809	0.494692	0.681108
TDRD7	0.425619	0.0278736	0.132951
RPL36AL	0.425367	0.0106817	0.0845785
TIGD1	0.425252	0.218137	0.418192
NECAB3	0.4251	0.041545	0.164271
RPS27A	0.425014	0.0218943	0.118176
MRM1	0.424958	0.138586	0.321331
LAMTOR2	0.424595	0.00872215	0.0781472
TIRAP	0.424586	0.135298	0.31661
CKAP4	0.424446	0.0151415	0.0983528
NRP2	0.424404	0.0243173	0.125195
HIVEP3	0.424297	0.209302	0.408605
VPS26B	0.424093	0.164228	0.3546
ZSCAN18	0.42397	0.0281074	0.133394
FBXO21	0.423909	0.0352214	0.149691
TTYH3	0.423813	0.0352858	0.149805
FGL2	0.42376	0.0632532	0.206529
MRPS36	0.423569	0.0136254	0.0937758
NELFE	0.423421	0.0176289	0.106093
PELI3	0.423377	0.0931006	0.25666
ANAPC2	0.42331	0.0766532	0.227842
MTSS1L	0.423252	0.224614	0.425294
LCA5L	0.423153	0.251827	0.455142
UAP1L1	0.422973	0.0371108	0.154161
WDR81	0.42295	0.0525305	0.186421
FAM83H	0.422936	0.16067	0.350302
TUBG2	0.422909	0.0809196	0.235401
STIM2	0.422849	0.0450366	0.172276
MTG1	0.422403	0.0793632	0.232536
ASB1	0.422356	0.0334646	0.145277
EPC2	0.421941	0.0639838	0.207778
EIF2B2	0.421873	0.0112395	0.0857696
ROPN1B	0.421385	0.0331731	0.144696
TCP11L1	0.42134	0.253965	0.457621
POU3F2	0.421329	0.102136	0.270595
RAP1GDS1	0.421299	0.0766255	0.227842
SURF2	0.421192	0.164014	0.354399
TTC8	0.420772	0.0339674	0.146749
ABTB2	0.420684	0.130618	0.310456
CCDC136	0.42047	0.080841	0.235401
ALDH1A1	0.42021	0.159011	0.348191
C1orf50	0.420064	0.0178341	0.106712
PDGFC	0.419997	0.261046	0.465057
ZNF134	0.419644	0.257946	0.462396
GYG1	0.419527	0.0367904	0.15364
MIEN1	0.419368	0.0111121	0.0853356
ZNF581	0.419321	0.12506	0.303284
COX7B	0.418969	0.0265002	0.129985
BRI3	0.418967	0.0205935	0.114377
APOL2	0.418959	0.0329492	0.144511
LMAN2L	0.418932	0.0393928	0.159523
FAM64A	0.418616	0.0659077	0.210634
LINC00282	0.418419	0.176836	0.370369
TMLHE	0.418221	0.0207333	0.114764
PARVA	0.417732	0.0250429	0.126665
SH3BP2	0.417528	0.106183	0.276557
ASB6	0.417356	0.0362478	0.152371
CAPN7	0.417275	0.0925155	0.255783
RNF181	0.417172	0.0160604	0.101407
FBXO8	0.41691	0.138455	0.321214
EID2B	0.416877	0.0582932	0.196185
RAPGEFL1	0.416687	0.370063	0.576659
MSRA	0.416623	0.113815	0.287236
CAMK2N1	0.416439	0.058827	0.197548
LIX1L	0.416097	0.112858	0.28626
RTF1	0.41592	0.0476418	0.1769
JMJD8	0.415861	0.111815	0.284667
ALCAM	0.415484	0.022283	0.11984
NDUFS6	0.415366	0.0307456	0.139619
KPTN	0.41528	0.0743223	0.225083
B3GNTL1	0.415031	0.2383	0.440128
NRG3	0.414829	0.0727443	0.222028
CTSK	0.414601	0.0162024	0.101715
[truncated: 9,935 more rows]
