# Supplementary material for: The Lipogenic Regulator SREBP2 Induces Transferrin in Circulating Melanoma Cells and Suppresses Ferroptosis
Source: Oxford University Press journal article supplement (doi:10.1158/2159-8290.cd-19-1500), 2020-11-17
Supplement: 21598290cd191500-sup-234279_2_supp_6710152_qj55dt.xlsx [file 21598290cd191500-sup-234279_2_supp_6710152_qj55dt.xlsx]

## Sheet: Differential GSVA-all patients
Set	P value	FDR-adjusted P value	Mean difference in GSVA enrichment scores (C2-C1)
OXIDATIVE_PHOSPHORYLATION	1.52919e-22	8.41057e-21	0.600211
MYC_TARGETS_V2	2.93088e-17	4.02996e-16	0.591033
MYC_TARGETS_V1	5.5561e-22	1.52793e-20	0.540921
SREBP_2_TARGET	2.48471e-08	9.76137e-08	0.385084
PANCREAS_BETA_CELLS	1.67754e-06	4.19386e-06	0.353856
FATTY_ACID_METABOLISM	1.17728e-14	1.07917e-13	0.348879
ADIPOGENESIS	1.80484e-17	3.30888e-16	0.292163
MTORC1_SIGNALING	5.22925e-16	5.75217e-15	0.27358
UNFOLDED_PROTEIN_RESPONSE	4.0421e-12	2.77894e-11	0.265974
DNA_REPAIR	6.432e-12	3.93067e-11	0.254398
INTERFERON_ALPHA_RESPONSE	1.92525e-08	8.14529e-08	0.241474
IRON_ION_HOMEOSTASIS	5.64053e-07	1.82488e-06	0.24063
SREBP_1_TARGET	0.00473976	0.0074482	0.19976
ANDROGEN_RESPONSE	1.74949e-08	8.01852e-08	0.195896
ALLOGRAFT_REJECTION	6.07589e-06	1.342e-05	0.184926
INTERFERON_GAMMA_RESPONSE	6.60249e-08	2.42091e-07	0.183283
PROTEIN_SECRETION	3.06911e-07	1.05501e-06	0.177728
PEROXISOME	5.97473e-06	1.342e-05	0.171523
APICAL_SURFACE	0.00795116	0.0118193	0.165304
PI3K_AKT_MTOR_SIGNALING	0.000102673	0.000190716	0.149984
REACTIVE_OXIGEN_SPECIES_PATHWAY	0.00765876	0.0117009	0.132504
GLYCOLYSIS	3.6291e-05	7.39262e-05	0.131746
FERROPTOSIS	0.0293932	0.038491	0.108116
XENOBIOTIC_METABOLISM	0.00248624	0.00414374	0.0999378
SREBP_TARGET	0.0749086	0.0915549	0.0861314
HYPOXIA	0.0192724	0.0264996	0.0671173
E2F_TARGETS	0.0969307	0.11343	0.0597819
P53_PATHWAY	0.0832421	0.0995285	0.0537682
CHOLESTEROL_HOMEOSTASIS	0.185766	0.212857	0.044714
UV_RESPONSE_UP	0.226026	0.253703	0.0431733
BILE_ACID_METABOLISM	0.952637	0.952637	0.00285249
APOPTOSIS	0.662521	0.687522	-0.0125089
KRAS_SIGNALING_UP	0.685253	0.697943	-0.01557
IL2_STAT5_SIGNALING	0.415936	0.448559	-0.0245763
NOTCH_SIGNALING	0.605762	0.64071	-0.0300381
ESTROGEN_RESPONSE_LATE	0.412498	0.448559	-0.0322696
G2M_CHECKPOINT	0.0124992	0.0176271	-0.0758829
COMPLEMENT	0.0224643	0.030135	-0.0815283
HEME_METABOLISM	0.0630275	0.0787844	-0.0950568
EPITHELIAL_MESENCHYMAL_TRANSITION	0.00940701	0.0136154	-0.102947
TNFA_SIGNALING_VIA_NFKB	0.00405578	0.00656082	-0.111172
IL6_JAK_STAT3_SIGNALING	0.00113163	0.001945	-0.117558
ESTROGEN_RESPONSE_EARLY	0.000104027	0.000190716	-0.135062
ANGIOGENESIS	0.035169	0.0449837	-0.150266
TGF_BETA_SIGNALING	4.80952e-05	9.44728e-05	-0.164703
APICAL_JUNCTION	6.1e-06	1.342e-05	-0.178307
UV_RESPONSE_DN	2.33501e-05	4.93944e-05	-0.185552
MITOTIC_SPINDLE	4.47447e-10	2.46096e-09	-0.204589
INFLAMMATORY_RESPONSE	7.8021e-07	2.38398e-06	-0.215535
COAGULATION	1.48071e-06	4.12533e-06	-0.242615
WNT_BETA_CATENIN_SIGNALING	0.000385714	0.000684331	-0.250231
SPERMATOGENESIS	1.61844e-06	4.19386e-06	-0.280978
MYOGENESIS	2.06335e-14	1.62121e-13	-0.306414
HEDGEHOG_SIGNALING	1.50012e-06	4.12533e-06	-0.364535
KRAS_SIGNALING_DN	2.09395e-09	1.04698e-08	-0.40571

## Sheet: Differential GSVA-perm.test
Set	P value (permutation-based)	FDR-adjusted P value (permutation-based)
OXIDATIVE_PHOSPHORYLATION	0	0
MYC_TARGETS_V2	0	0
MYC_TARGETS_V1	0	0
SREBP_2_TARGET	0.0159405	0.0674405
PANCREAS_BETA_CELLS	0.0308183	0.0984395
FATTY_ACID_METABOLISM	0	0
ADIPOGENESIS	0	0
MTORC1_SIGNALING	0	0
UNFOLDED_PROTEIN_RESPONSE	0	0
DNA_REPAIR	0	0
INTERFERON_ALPHA_RESPONSE	0.00956429	0.0478215
IRON_ION_HOMEOSTASIS	0.0340064	0.0984395
SREBP_1_TARGET	0.287991	0.445472
ANDROGEN_RESPONSE	0.0223167	0.0876727
ALLOGRAFT_REJECTION	0.0722635	0.15898
INTERFERON_GAMMA_RESPONSE	0.0244421	0.089621
PROTEIN_SECRETION	0.0329437	0.0984395
PEROXISOME	0.0584485	0.133944
APICAL_SURFACE	0.298618	0.445472
PI3K_AKT_MTOR_SIGNALING	0.119022	0.218208
REACTIVE_OXIGEN_SPECIES_PATHWAY	0.299681	0.445472
GLYCOLYSIS	0.0935175	0.190499
FERROPTOSIS	0.395324	0.517686
XENOBIOTIC_METABOLISM	0.252922	0.421537
SREBP_TARGET	0.510096	0.609897
HYPOXIA	0.347503	0.477816
E2F_TARGETS	0.545165	0.637959
P53_PATHWAY	0.497343	0.607864
CHOLESTEROL_HOMEOSTASIS	0.609989	0.698946
UV_RESPONSE_UP	0.662062	0.74313
BILE_ACID_METABOLISM	0.974495	0.974495
APOPTOSIS	0.87779	0.902704
KRAS_SIGNALING_UP	0.886291	0.902704
IL2_STAT5_SIGNALING	0.783209	0.844638
NOTCH_SIGNALING	0.820404	0.867735
ESTROGEN_RESPONSE_LATE	0.752391	0.82763
G2M_CHECKPOINT	0.340064	0.477816
COMPLEMENT	0.37407	0.501801
HEME_METABOLISM	0.469713	0.587141
EPITHELIAL_MESENCHYMAL_TRANSITION	0.315622	0.456821
TNFA_SIGNALING_VIA_NFKB	0.285866	0.445472
IL6_JAK_STAT3_SIGNALING	0.201913	0.347038
ESTROGEN_RESPONSE_EARLY	0.109458	0.207593
ANGIOGENESIS	0.428268	0.547784
TGF_BETA_SIGNALING	0.104145	0.20457
APICAL_JUNCTION	0.0520723	0.124521
UV_RESPONSE_DN	0.0797024	0.168601
MITOTIC_SPINDLE	0.0063762	0.0350691
INFLAMMATORY_RESPONSE	0.031881	0.0984395
COAGULATION	0.0414453	0.108547
WNT_BETA_CATENIN_SIGNALING	0.147715	0.262075
SPERMATOGENESIS	0.0488842	0.12221
MYOGENESIS	0.0031881	0.0194828
HEDGEHOG_SIGNALING	0.0393199	0.10813
KRAS_SIGNALING_DN	0.0116897	0.0535778

## Sheet: Differential GSVA-immunotherapy
Set	P value	FDR-adjusted P value	Mean difference in GSVA enrichment scores (C2-C1)
MYC_TARGETS_V2	6.48594e-14	3.56727e-12	0.612554
OXIDATIVE_PHOSPHORYLATION	1.35055e-12	2.476e-11	0.558743
SREBF2_TARGET	9.5172e-10	7.4778e-09	0.509104
MYC_TARGETS_V1	6.21086e-12	8.53993e-11	0.478665
SREBF1_TARGET	0.000999591	0.00213264	0.300877
PANCREAS_BETA_CELLS	0.000111694	0.000341286	0.29036
UNFOLDED_PROTEIN_RESPONSE	5.5043e-10	5.04561e-09	0.282583
FATTY_ACID_METABOLISM	5.98702e-07	3.29286e-06	0.276917
ADIPOGENESIS	1.08962e-09	7.49117e-09	0.271787
DNA_REPAIR	1.58466e-08	9.68402e-08	0.252124
IRON_ION_HOMEOSTASIS	0.000381979	0.00105044	0.21537
SREBP_TARGET	0.00026524	0.0007678	0.210519
MTORC1_SIGNALING	3.75252e-06	1.87626e-05	0.203722
PROTEIN_SECRETION	8.44181e-06	3.57154e-05	0.195691
INTERFERON_ALPHA_RESPONSE	0.00205265	0.00403199	0.171599
ANDROGEN_RESPONSE	0.000797667	0.00190747	0.142481
PEROXISOME	0.00695637	0.0126929	0.132807
GLYCOLYSIS	0.00233615	0.00443063	0.122963
NOTCH_SIGNALING	0.0948269	0.124178	0.107084
PI3K_AKT_MTOR_SIGNALING	0.0254839	0.0400461	0.10566
E2F_TARGETS	0.0186173	0.0301163	0.094867
REACTIVE_OXIGEN_SPECIES_PATHWAY	0.140531	0.179749	0.088685
INTERFERON_GAMMA_RESPONSE	0.0396378	0.0589211	0.0875685
FERROPTOSIS	0.248988	0.297703	0.0721325
XENOBIOTIC_METABOLISM	0.0754281	0.101184	0.0713702
APICAL_SURFACE	0.398156	0.456221	0.062881
ALLOGRAFT_REJECTION	0.267592	0.313139	0.0554324
CHOLESTEROL_HOMEOSTASIS	0.238866	0.291948	0.0467959
BILE_ACID_METABOLISM	0.51726	0.568986	0.0346039
HYPOXIA	0.666565	0.718844	0.0148088
IL2_STAT5_SIGNALING	0.776254	0.805547	0.0110649
ESTROGEN_RESPONSE_LATE	0.874273	0.874273	-0.00788058
UV_RESPONSE_UP	0.807152	0.822099	-0.0104557
P53_PATHWAY	0.740452	0.78317	-0.0117422
HEME_METABOLISM	0.481334	0.540273	-0.0481471
APOPTOSIS	0.0499365	0.0722766	-0.0650426
KRAS_SIGNALING_UP	0.166465	0.208081	-0.0662031
ESTROGEN_RESPONSE_EARLY	0.0532105	0.0750405	-0.0851021
G2M_CHECKPOINT	0.0174073	0.0290121	-0.0896057
COMPLEMENT	0.0291896	0.0445952	-0.0932435
IL6_JAK_STAT3_SIGNALING	0.00715417	0.0126929	-0.123006
UV_RESPONSE_DN	0.011247	0.0193307	-0.142677
EPITHELIAL_MESENCHYMAL_TRANSITION	0.00084168	0.00192885	-0.168429
TGF_BETA_SIGNALING	0.00112404	0.00228972	-0.176292
TNFA_SIGNALING_VIA_NFKB	6.51804e-05	0.00021245	-0.177221
WNT_BETA_CATENIN_SIGNALING	0.0596324	0.0819946	-0.178149
MITOTIC_SPINDLE	9.98691e-06	3.92343e-05	-0.181865
APICAL_JUNCTION	4.24133e-06	1.94394e-05	-0.223861
SPERMATOGENESIS	0.00100816	0.00213264	-0.230393
COAGULATION	1.60613e-05	5.88914e-05	-0.263813
ANGIOGENESIS	0.000703184	0.00175796	-0.2738
MYOGENESIS	9.19139e-11	1.01105e-09	-0.300434
HEDGEHOG_SIGNALING	0.000646873	0.00169419	-0.319268
KRAS_SIGNALING_DN	6.56664e-05	0.00021245	-0.329561
INFLAMMATORY_RESPONSE	1.1766e-12	2.476e-11	-0.345636

## Sheet: MYC_TARGETS_V1
Set	Gene	P value	Log2FoldChange	Mean expression C1	Mean expression C2
MYC_TARGETS_V1	ETF1	4.05977e-232	4.51558	0.636364	162.186
MYC_TARGETS_V1	PSMA1	1.39815e-192	2.44661	3	143.698
MYC_TARGETS_V1	GNL3	1.95039e-191	3.80014	1.0303	106.116
MYC_TARGETS_V1	CCT7	5.20519e-175	3.83128	0.636364	116.581
MYC_TARGETS_V1	PRDX3	5.32583e-136	2.08692	0	41.8372
MYC_TARGETS_V1	HDDC2	5.31609e-125	1.49273	0	31
MYC_TARGETS_V1	PGK1	3.15924e-22	1.58418	13.5455	238.651
MYC_TARGETS_V1	EIF3B	5.01846e-16	5.68006	0.121212	72.7442
MYC_TARGETS_V1	NCBP2	9.11354e-15	-0.020718	2.18182	57.7442
MYC_TARGETS_V1	BUB3	2.43842e-14	0.17863	22.5455	86.0698
MYC_TARGETS_V1	FBL	9.32181e-14	2.13682	1.84848	46.186
MYC_TARGETS_V1	PA2G4	8.29077e-12	-1.62921	17.3333	70.9767
MYC_TARGETS_V1	CCT4	9.91499e-12	2.06215	1.0303	170.535
MYC_TARGETS_V1	LDHA	2.80017e-11	3.41297	1.57576	269.256
MYC_TARGETS_V1	NOP16	5.73686e-11	4.37281	0.121212	58.8605
MYC_TARGETS_V1	RPS6	4.30505e-10	4.97732	1.87879	932.395
MYC_TARGETS_V1	NDUFAB1	4.99921e-10	1.05775	8.21212	53.3023
MYC_TARGETS_V1	RPL14	1.83797e-09	4.67177	1.51515	200.14
MYC_TARGETS_V1	RANBP1	1.85461e-09	1.05802	0.939394	41.3953
MYC_TARGETS_V1	HSPE1	1.98923e-09	3.73495	0.181818	143.977
MYC_TARGETS_V1	HSPD1	2.38822e-09	4.59439	1.09091	165.86
MYC_TARGETS_V1	NME1	5.31499e-09	3.78765	0.212121	63.6977
MYC_TARGETS_V1	RPS2	6.43368e-09	4.8974	0.424242	118.14
MYC_TARGETS_V1	MCM5	8.34702e-09	0.438685	3.78788	59.907
MYC_TARGETS_V1	C1QBP	1.01911e-08	2.93829	0.030303	24.6977
MYC_TARGETS_V1	SNRPG	6.03545e-08	4.54549	0.181818	87
MYC_TARGETS_V1	HSP90AB1	7.48805e-08	4.17806	6.87879	1636.67
MYC_TARGETS_V1	EEF1B2	8.5148e-08	4.4821	0.121212	156.372
MYC_TARGETS_V1	EIF2S2	8.60508e-08	4.05357	0.545455	96.0465
MYC_TARGETS_V1	TUFM	1.14828e-07	5.41367	0.484848	116.674
MYC_TARGETS_V1	CNBP	2.12565e-07	4.17112	0.666667	370.558
MYC_TARGETS_V1	CCT3	2.84338e-07	4.17663	0.121212	112.442
MYC_TARGETS_V1	ILF2	3.40823e-07	4.22651	0.242424	114.465
MYC_TARGETS_V1	IMPDH2	3.63267e-07	3.93522	0.212121	72.4651
MYC_TARGETS_V1	SNRPA1	4.97878e-07	4.23016	0.0606061	17.6744
MYC_TARGETS_V1	EIF2S1	5.42698e-07	4.24032	0.939394	118.721
MYC_TARGETS_V1	SF3B3	7.37551e-07	0.602785	9.21212	74.2558
MYC_TARGETS_V1	CCT2	1.09213e-06	3.7562	0.242424	117.86
MYC_TARGETS_V1	RPS5	1.18399e-06	3.48575	6.15152	646.907
MYC_TARGETS_V1	GLO1	2.38746e-06	1.31815	1.48485	49.7907
MYC_TARGETS_V1	FAM120A	2.80189e-06	3.15641	1.51515	91.3488
MYC_TARGETS_V1	AP3S1	3.93949e-06	3.77191	0.333333	32.6279
MYC_TARGETS_V1	TARDBP	4.76493e-06	4.26022	22.8182	437.419
MYC_TARGETS_V1	COPS5	4.7382e-05	3.01908	0.363636	47.3488
MYC_TARGETS_V1	IARS	5.73965e-05	2.91179	1.12121	201.349
MYC_TARGETS_V1	SYNCRIP	6.89092e-05	2.71903	4.51515	96.2558
MYC_TARGETS_V1	NOP56	7.15248e-05	4.37733	0.787879	124.302
MYC_TARGETS_V1	TXNL4A	0.000113335	2.77119	0.484848	33.4186
MYC_TARGETS_V1	ERH	0.000136358	2.77459	0.0606061	17.3488
MYC_TARGETS_V1	COX5A	0.000190482	-1.01381	6.09091	45
MYC_TARGETS_V1	EIF4A1	0.000201381	2.3331	9.75758	391.698
MYC_TARGETS_V1	HNRNPD	0.000205932	2.58218	11.5152	99.8837
MYC_TARGETS_V1	LSM7	0.000218005	0.10729	5.39394	24.5349
MYC_TARGETS_V1	RPS10	0.00022399	2.48659	2.18182	120.86
MYC_TARGETS_V1	HNRNPC	0.000235033	2.41014	31.6364	426.186
MYC_TARGETS_V1	ODC1	0.000239606	2.16959	145.303	482.256
MYC_TARGETS_V1	PSMD14	0.000268935	2.62156	0.212121	93.4186
MYC_TARGETS_V1	KPNA2	0.000283724	2.80975	0.969697	155.279
MYC_TARGETS_V1	RPL6	0.000336063	4.23631	0.727273	210.465
MYC_TARGETS_V1	RPL34	0.000360152	2.33654	5.06061	374.791
MYC_TARGETS_V1	SSBP1	0.000493973	2.29509	0.454545	46.1163
MYC_TARGETS_V1	SRSF2	0.00087729	2.04874	11.7576	297.907
MYC_TARGETS_V1	SNRPB2	0.00116681	4.55406	0.30303	38.814
MYC_TARGETS_V1	RPLP0	0.00123502	2.20928	7.81818	666.884
MYC_TARGETS_V1	NPM1	0.00142262	2.07674	4.9697	172.465
MYC_TARGETS_V1	NOLC1	0.00160784	2.1703	1.93939	108.953
MYC_TARGETS_V1	IFRD1	0.00189085	0.236169	706.03	784.86
MYC_TARGETS_V1	SMARCC1	0.00193457	-0.694038	19.4242	98.1628
MYC_TARGETS_V1	PRDX4	0.002164	1.95627	1.06061	75
MYC_TARGETS_V1	EIF4H	0.00229957	3.30991	6.66667	210.326
MYC_TARGETS_V1	PTGES3	0.00251723	2.07153	13.6364	377.605
MYC_TARGETS_V1	PSMA7	0.00273732	2.43181	21.8788	410.419
MYC_TARGETS_V1	UBA2	0.00275369	1.96981	2.09091	89.6744
MYC_TARGETS_V1	ABCE1	0.00312823	2.01512	1.60606	81.7209
MYC_TARGETS_V1	HDGF	0.00438629	1.44003	15.9091	90.7674
MYC_TARGETS_V1	XRCC6	0.00690243	1.79296	8.87879	303.186
MYC_TARGETS_V1	RPL18	0.00940716	1.70942	29.8182	475.86
MYC_TARGETS_V1	PSMD7	0.0105718	1.53501	0.69697	73.3256
MYC_TARGETS_V1	DHX15	0.0118216	1.6779	25.1818	159.326
MYC_TARGETS_V1	RUVBL2	0.0135233	2.43638	1	58.2558
MYC_TARGETS_V1	CANX	0.0161736	1.60823	3.48485	319.837
MYC_TARGETS_V1	USP1	0.0162774	2.79942	1.63636	87.3256
MYC_TARGETS_V1	RRM1	0.0194308	-0.433426	4.33333	50.7209
MYC_TARGETS_V1	SRSF7	0.023746	-0.128857	31.1818	174.721
MYC_TARGETS_V1	MCM7	0.0297538	1.72126	95.0606	345.558
MYC_TARGETS_V1	EXOSC7	0.0311467	-1.41887	2	8.74419
MYC_TARGETS_V1	CBX3	0.0320644	1.92993	22.7879	191.558
MYC_TARGETS_V1	EPRS	0.0333881	-0.53835	7.27273	32.7674
MYC_TARGETS_V1	CCT5	0.0411866	1.09894	0.848485	207.581
MYC_TARGETS_V1	SET	0.0486231	1.22479	20.5758	246.558
MYC_TARGETS_V1	HNRNPA1	0.0488707	1.28685	25.697	324.535
MYC_TARGETS_V1	RNPS1	0.0511381	-0.427687	44.2727	78.8837
MYC_TARGETS_V1	PSMC4	0.0531517	1.13781	3.81818	79.5581
MYC_TARGETS_V1	SNRPD2	0.0560874	1.18253	5.42424	65.9767
MYC_TARGETS_V1	NAP1L1	0.0586264	-0.0416625	575.303	602.488
MYC_TARGETS_V1	RPS3	0.0652294	1.1662	43.9697	870.744
MYC_TARGETS_V1	MRPL9	0.0689555	1.09075	1.09091	12.4419
MYC_TARGETS_V1	RPL22	0.0738349	1.15331	2.09091	109.395
MYC_TARGETS_V1	PABPC1	0.0785323	1.19356	79	580.767
MYC_TARGETS_V1	CUL1	0.079916	0.99754	25.6364	93.4186
MYC_TARGETS_V1	YWHAE	0.0855621	1.76867	35.8485	323.395
MYC_TARGETS_V1	PHB2	0.0929394	-0.877313	30.303	152.581
MYC_TARGETS_V1	CLNS1A	0.0940422	4.64582	0.151515	8
MYC_TARGETS_V1	MRPS18B	0.105294	1.8993	1.45455	59.4186
MYC_TARGETS_V1	MAD2L1	0.10574	1.14679	7.45455	45.7209
MYC_TARGETS_V1	NCBP1	0.106164	-2.73177	46.6061	27.7674
MYC_TARGETS_V1	KARS	0.10729	0.436449	34.4545	55.7907
MYC_TARGETS_V1	SRSF3	0.107432	1.7281	191.394	997.698
MYC_TARGETS_V1	RSL1D1	0.116525	1.70035	1.36364	67.8837
MYC_TARGETS_V1	XPOT	0.117568	0.984968	2.57576	45.8372
MYC_TARGETS_V1	PPIA	0.159906	0.870414	16.3636	247.093
MYC_TARGETS_V1	PSMA6	0.184671	-0.782317	15.7879	68.3023
MYC_TARGETS_V1	SSB	0.191316	2.2	6.90909	99.2558
MYC_TARGETS_V1	MCM6	0.241674	-0.220379	32.9394	47.0698
MYC_TARGETS_V1	ACP1	0.255926	0.727447	41.5455	335.535
MYC_TARGETS_V1	PSMB2	0.260086	0.751755	10.4848	156.791
MYC_TARGETS_V1	POLE3	0.270422	1.04189	3.39394	49.093
MYC_TARGETS_V1	HNRNPA3	0.273026	-0.672923	21.3333	103.512
MYC_TARGETS_V1	SLC25A3	0.279987	0.691252	47.2727	491.907
MYC_TARGETS_V1	ORC2	0.28062	0.655804	5	10.3953
MYC_TARGETS_V1	DDX21	0.293398	0.46878	3.78788	64.1628
MYC_TARGETS_V1	TCP1	0.309709	-0.601601	25.3939	168.233
MYC_TARGETS_V1	G3BP1	0.310922	0.643189	11.9394	117.186
MYC_TARGETS_V1	TRIM28	0.319852	-1.25842	50.8485	62.0465
MYC_TARGETS_V1	UBE2E1	0.321522	-1.05891	4.12121	25.9535
MYC_TARGETS_V1	STARD7	0.324831	1.90321	1.93939	38.7209
MYC_TARGETS_V1	PPM1G	0.326106	-0.537753	6.9697	82.0698
MYC_TARGETS_V1	HNRNPA2B1	0.326851	1.08182	185.333	704.465
MYC_TARGETS_V1	UBE2L3	0.379139	2.57261	10.6061	79.093
MYC_TARGETS_V1	RAD23B	0.386186	2.56814	4.60606	34.0465
MYC_TARGETS_V1	PSMB3	0.397411	3.98843	0	50.4651
MYC_TARGETS_V1	PSMA2	0.416865	-0.450038	41.2424	173.233
MYC_TARGETS_V1	SERBP1	0.441425	0.496403	21	132.953
MYC_TARGETS_V1	GSPT1	0.443357	0.490808	8.84848	93.7907
MYC_TARGETS_V1	EIF4E	0.461037	0.514961	47.1818	147.558
MYC_TARGETS_V1	PWP1	0.48643	1.40346	0.727273	12.907
MYC_TARGETS_V1	SNRPD1	0.501697	-0.594805	10.8485	41.2093
MYC_TARGETS_V1	PCBP1	0.506961	0.47574	17.8485	52.6512
MYC_TARGETS_V1	SRPK1	0.521826	-1.45402	8.87879	32.4419
MYC_TARGETS_V1	HDAC2	0.524036	1.31137	26.1212	280.07
MYC_TARGETS_V1	CYC1	0.539354	0.381498	11.8485	76.8372
MYC_TARGETS_V1	PSMD1	0.55816	0.591601	4.45455	96.0233
MYC_TARGETS_V1	HNRNPU	0.64359	0.272173	95.3939	417.651
MYC_TARGETS_V1	PSMD8	0.645492	0.285294	12.3636	139.326
MYC_TARGETS_V1	HNRNPR	0.648565	0.293994	19.3636	148.349
MYC_TARGETS_V1	TRA2B	0.658967	0.274144	148.485	252.721
MYC_TARGETS_V1	VBP1	0.668863	3.21453	0	60.5116
MYC_TARGETS_V1	GOT2	0.680157	-1.25989	7.9697	21.2791
MYC_TARGETS_V1	VDAC1	0.694267	4.48651	0	61.2326
MYC_TARGETS_V1	SF3A1	0.69634	0.292825	34.7576	69.6977
MYC_TARGETS_V1	EIF1AX	0.710049	-0.0176487	11.1212	20.5349
MYC_TARGETS_V1	NHP2	0.710494	4.13538	0	41.7209
MYC_TARGETS_V1	SRSF1	0.718582	1.07008	38.6667	205.953
MYC_TARGETS_V1	VDAC3	0.721028	-0.213395	100.97	124.349
MYC_TARGETS_V1	H2AFZ	0.741051	-0.199922	34.1515	186.977
MYC_TARGETS_V1	SNRPD3	0.756553	1.15286	1.18182	18.9767
MYC_TARGETS_V1	DDX18	0.777869	-0.190257	5.36364	41.0465
MYC_TARGETS_V1	XPO1	0.795446	0.155729	145.485	264.628
MYC_TARGETS_V1	PSMC6	0.807766	-0.149102	1.9697	39.3721
MYC_TARGETS_V1	RAN	0.808295	-0.161647	11.3939	315.93
MYC_TARGETS_V1	DEK	0.812478	-0.152233	49.1212	158.372
MYC_TARGETS_V1	PSMA4	0.844453	1.15984	0.878788	48.186
MYC_TARGETS_V1	YWHAQ	0.84468	-0.118803	10.6364	186.814
MYC_TARGETS_V1	EIF3D	0.858919	-0.104703	13.9697	92.0698
MYC_TARGETS_V1	PSMD3	0.876624	1.4492	1.06061	30.5814
MYC_TARGETS_V1	CDK2	0.940618	-0.048379	9.84848	48.7907
MYC_TARGETS_V1	EIF3J	0.947447	-1.6935	22.4242	21.4186
MYC_TARGETS_V1	EIF4G2	0.976544	0.740705	165.909	685.674
MYC_TARGETS_V1	KPNB1	0.979281	-0.0187051	12.303	46.2326

## Sheet: MYC_TARGETS_V2
Set	Gene	P value	Log2FoldChange	Mean expression C1	Mean expression C2
MYC_TARGETS_V2	GNL3	1.95039e-191	3.80014	1.0303	106.116
MYC_TARGETS_V2	NOP2	3.44426e-15	1.59639	4.60606	94.7442
MYC_TARGETS_V2	PA2G4	8.29077e-12	-1.62921	17.3333	70.9767
MYC_TARGETS_V2	NOP16	5.73686e-11	4.37281	0.121212	58.8605
MYC_TARGETS_V2	RCL1	1.23421e-09	2.41502	7.81818	130.93
MYC_TARGETS_V2	HSPE1	1.98923e-09	3.73495	0.181818	143.977
MYC_TARGETS_V2	HSPD1	2.38822e-09	4.59439	1.09091	165.86
MYC_TARGETS_V2	MCM5	8.34702e-09	0.438685	3.78788	59.907
MYC_TARGETS_V2	NOP56	7.15248e-05	4.37733	0.787879	124.302
MYC_TARGETS_V2	IMP4	0.000120804	2.65322	0.393939	47.4884
MYC_TARGETS_V2	NPM1	0.00142262	2.07674	4.9697	172.465
MYC_TARGETS_V2	NOLC1	0.00160784	2.1703	1.93939	108.953
MYC_TARGETS_V2	PPRC1	0.00419827	1.97333	1.75758	38.4884
MYC_TARGETS_V2	CBX3	0.0320644	1.92993	22.7879	191.558
MYC_TARGETS_V2	WDR43	0.0336979	1.86308	3.09091	62.6047
MYC_TARGETS_V2	PRMT3	0.0455237	-2.82137	16.2121	18.6047
MYC_TARGETS_V2	TCOF1	0.0996719	-0.189776	4.81818	10.6744
MYC_TARGETS_V2	PLK4	0.16525	1.37556	6.81818	10.9535
MYC_TARGETS_V2	RABEPK	0.255706	1.46255	5.63636	21.186
MYC_TARGETS_V2	RRP12	0.274181	2.16533	1.63636	20.8605
MYC_TARGETS_V2	EXOSC5	0.326858	-0.610102	3.51515	12.6744
MYC_TARGETS_V2	TBRG4	0.332402	0.626034	3.33333	41.1395
MYC_TARGETS_V2	FARSA	0.627612	-0.300713	3.33333	46.093
MYC_TARGETS_V2	SUPV3L1	0.730024	4.36524	0	41.5814
MYC_TARGETS_V2	DDX18	0.777869	-0.190257	5.36364	41.0465
MYC_TARGETS_V2	UTP20	0.993582	-0.732459	2.69697	7.06977
MYC_TARGETS_V2	MPHOSPH10	0.994445	-0.409469	8.78788	33.2558

## Sheet: SREBP_2_TARGET
Set	Gene	P value	Log2FoldChange	Mean expression C1	Mean expression C2
SREBP_2_TARGET	IDI1	2.10255e-24	4.2583	0.454545	56.3953
SREBP_2_TARGET	FDFT1	1.56025e-07	2.18299	15.2424	96.8837
SREBP_2_TARGET	LSS	0.00709911	0.691405	12.6364	80.8605
SREBP_2_TARGET	ACAT2	0.0845998	1.07578	2.12121	59.3953
SREBP_2_TARGET	HMGCR	0.194565	0.740365	3.0303	63.814
SREBP_2_TARGET	MSMO1	0.377458	-0.519541	1.72727	8.39535
SREBP_2_TARGET	DHCR7	0.422513	0.495296	5.06061	58.093
SREBP_2_TARGET	HMGCS1	0.607816	0.211654	5.15152	24.7674

## Sheet: FATTY_ACID_METABOLISM
Set	Gene	P value	Log2FoldChange	Mean expression C1	Mean expression C2
FATTY_ACID_METABOLISM	LGALS1	1.71341e-156	1.73746	5.36364	499.209
FATTY_ACID_METABOLISM	ELOVL5	2.24203e-124	1.59263	0	107.233
FATTY_ACID_METABOLISM	IDI1	2.10255e-24	4.2583	0.454545	56.3953
FATTY_ACID_METABOLISM	PDHA1	5.07694e-22	1.40225	10.3333	91.1395
FATTY_ACID_METABOLISM	SMS	1.37105e-19	2.37423	1.09091	42.8837
FATTY_ACID_METABOLISM	HMGCL	5.88728e-17	0.520501	14.0909	35.7907
FATTY_ACID_METABOLISM	ECH1	1.23996e-15	-0.0585021	29.9394	72.8837
FATTY_ACID_METABOLISM	HADHB	2.01189e-11	4.84076	0.0606061	94.6047
FATTY_ACID_METABOLISM	LDHA	2.80017e-11	3.41297	1.57576	269.256
FATTY_ACID_METABOLISM	ENO2	4.65533e-10	0.779947	71.0909	78.1395
FATTY_ACID_METABOLISM	GRHPR	1.502e-08	4.33201	0.121212	24.3721
FATTY_ACID_METABOLISM	OSTC	6.21318e-08	5.11097	0.030303	91.6279
FATTY_ACID_METABOLISM	DLD	2.4836e-07	4.34522	0.424242	49.6744
FATTY_ACID_METABOLISM	ALAD	3.58295e-07	2.76743	1.27273	103.372
FATTY_ACID_METABOLISM	MDH2	4.72071e-07	4.38815	0.0909091	48.4186
FATTY_ACID_METABOLISM	S100A10	5.82589e-07	4.51494	0.575758	276.302
FATTY_ACID_METABOLISM	ADIPOR2	1.07837e-06	1.97854	8.72727	57.8837
FATTY_ACID_METABOLISM	SERINC1	8.70194e-06	3.00227	9.30303	547.907
FATTY_ACID_METABOLISM	PSME1	1.04459e-05	3.18333	1	115.698
FATTY_ACID_METABOLISM	ERP29	4.71321e-05	2.83088	1.27273	118.721
FATTY_ACID_METABOLISM	HPGD	6.68839e-05	2.73723	1.81818	31.7907
FATTY_ACID_METABOLISM	D2HGDH	0.000109138	-3.00303	16.0303	2.51163
FATTY_ACID_METABOLISM	UBE2L6	0.00022996	0.0191857	9.09091	85.2558
FATTY_ACID_METABOLISM	ODC1	0.000239606	2.16959	145.303	482.256
FATTY_ACID_METABOLISM	GCDH	0.000451923	3.67921	0.545455	13.0465
FATTY_ACID_METABOLISM	GSTZ1	0.000810028	0.949355	11.6061	14.1163
FATTY_ACID_METABOLISM	IDH3G	0.00112441	-0.638246	15.9091	30.6744
FATTY_ACID_METABOLISM	UGDH	0.00131976	-1.16332	8.18182	27.8605
FATTY_ACID_METABOLISM	IDH3B	0.00145734	1.8652	2.45455	82.907
FATTY_ACID_METABOLISM	ACADM	0.00630538	-2.7488	25.0909	24.5814
FATTY_ACID_METABOLISM	GABARAPL1	0.00756415	1.83735	5.84848	128.767
FATTY_ACID_METABOLISM	CRAT	0.00997558	0.379841	271.303	241.512
FATTY_ACID_METABOLISM	NBN	0.0108818	1.69958	3.54545	20.6744
FATTY_ACID_METABOLISM	CPT1A	0.0110858	1.8163	6.81818	70.7442
FATTY_ACID_METABOLISM	CBR1	0.0125325	-0.674541	10.1515	26.5581
FATTY_ACID_METABOLISM	ETFDH	0.0125435	0.958642	7.60606	34.1628
FATTY_ACID_METABOLISM	HSPH1	0.0151109	0.720458	27.9091	295.116
FATTY_ACID_METABOLISM	DECR1	0.0166405	1.65457	1.24242	14.5581
FATTY_ACID_METABOLISM	HSD17B11	0.019832	2.15796	0.545455	41.2326
FATTY_ACID_METABOLISM	PPARA	0.0208031	0.77	2.06061	2.48837
FATTY_ACID_METABOLISM	SDHC	0.0416367	-2.5354	14.0303	7.09302
FATTY_ACID_METABOLISM	HSD17B4	0.0503834	1.78711	1.0303	13.7907
FATTY_ACID_METABOLISM	UROS	0.0572763	-1.46831	21	80.4884
FATTY_ACID_METABOLISM	CCDC58	0.0640674	3.07477	0.242424	6.93023
FATTY_ACID_METABOLISM	CPOX	0.0711435	2.29937	29.5758	171.93
FATTY_ACID_METABOLISM	ACAT2	0.0845998	1.07578	2.12121	59.3953
FATTY_ACID_METABOLISM	HSP90AA1	0.0940642	1.06526	122	1035.91
FATTY_ACID_METABOLISM	HADH	0.100504	1.64803	19.6061	81.1163
FATTY_ACID_METABOLISM	PRDX6	0.108271	2.07414	45.1212	493.977
FATTY_ACID_METABOLISM	ACSM3	0.17729	0.791935	2.30303	10.0233
FATTY_ACID_METABOLISM	GLUL	0.182319	2.73718	102.091	900.744
FATTY_ACID_METABOLISM	TP53INP2	0.196464	1.05983	2.66667	26.8605
FATTY_ACID_METABOLISM	EPHX1	0.199552	-0.835737	6.30303	3.37209
FATTY_ACID_METABOLISM	ME1	0.202353	-2.24959	10.1212	2.06977
FATTY_ACID_METABOLISM	ACADVL	0.213973	0.649007	26.2727	58.3023
FATTY_ACID_METABOLISM	METAP1	0.219755	-0.77209	25.6364	83.6744
FATTY_ACID_METABOLISM	RDH11	0.233127	0.761892	382.364	362.419
FATTY_ACID_METABOLISM	SDHA	0.262097	1.40678	37.7879	182.023
FATTY_ACID_METABOLISM	MLYCD	0.2992	1.06007	16.697	12.8605
FATTY_ACID_METABOLISM	ACSS1	0.337994	-1.86154	25.7576	11.6977
FATTY_ACID_METABOLISM	MCEE	0.350816	0.701841	1.48485	27.4884
FATTY_ACID_METABOLISM	ACOT8	0.376752	2.64497	2.66667	33.2093
FATTY_ACID_METABOLISM	SUCLG1	0.425512	0.770407	1.87879	39.6512
FATTY_ACID_METABOLISM	HIBCH	0.451666	2.40662	8.36364	59.7674
FATTY_ACID_METABOLISM	CD36	0.473854	0.449267	9.18182	90.5814
FATTY_ACID_METABOLISM	BMPR1B	0.486942	-0.320877	24.5152	11.8837
FATTY_ACID_METABOLISM	CA2	0.48784	2.68714	183.091	1486.26
FATTY_ACID_METABOLISM	MDH1	0.533802	-1.09636	16.2121	59.186
FATTY_ACID_METABOLISM	CIDEA	0.534975	-1.02808	4.48485	3.09302
FATTY_ACID_METABOLISM	PTS	0.546298	-3.0724	7.0303	5.7907
FATTY_ACID_METABOLISM	CPT2	0.593759	0.107349	3.57576	20.6279
FATTY_ACID_METABOLISM	HMGCS1	0.607816	0.211654	5.15152	24.7674
FATTY_ACID_METABOLISM	UROD	0.64563	0.280448	33.1212	548.535
FATTY_ACID_METABOLISM	GPD2	0.672724	1.88344	21.7273	37.5116
FATTY_ACID_METABOLISM	FASN	0.681076	0.675534	2.48485	29.4651
FATTY_ACID_METABOLISM	MGLL	0.685645	0.305054	60.9394	162.512
FATTY_ACID_METABOLISM	YWHAH	0.709857	2.07905	26.9697	79.3256
FATTY_ACID_METABOLISM	ADSL	0.713959	-2.02373	29.8182	52.8605
FATTY_ACID_METABOLISM	RAP1GDS1	0.736573	0.208751	15.8182	50.2093
FATTY_ACID_METABOLISM	DLST	0.738264	0.59386	25.8485	15.4884
FATTY_ACID_METABOLISM	H2AFZ	0.741051	-0.199922	34.1515	186.977
FATTY_ACID_METABOLISM	ACOX1	0.783534	1.04777	9.84848	23.8837
FATTY_ACID_METABOLISM	PTPRG	0.79403	0.14396	27.7576	58.6744
FATTY_ACID_METABOLISM	ACSL5	0.843942	-0.213154	3.06061	4
FATTY_ACID_METABOLISM	ALDOA	0.901968	0.869009	240.03	668.442
FATTY_ACID_METABOLISM	ALDH3A2	0.904147	-0.575853	7	5.76744
FATTY_ACID_METABOLISM	SDHD	0.935699	-0.0536709	10.1818	35.7907
FATTY_ACID_METABOLISM	SUCLG2	0.957318	0.0637511	1.15152	1.65116
FATTY_ACID_METABOLISM	ENO3	0.95992	-0.0356297	5.15152	35

## Sheet: ADIPOGENESIS
Set	Gene	P value	Log2FoldChange	Mean expression C1	Mean expression C2
ADIPOGENESIS	UQCRQ	4.24155e-161	3.60882	0	69.3953
ADIPOGENESIS	COQ9	1.61322e-142	5.1247	0	35.4419
ADIPOGENESIS	PRDX3	5.32583e-136	2.08692	0	41.8372
ADIPOGENESIS	SDHB	5.4169e-27	0.151407	16.0303	113.767
ADIPOGENESIS	BCKDHA	4.64567e-19	-2.38972	13.9394	15.6512
ADIPOGENESIS	APLP2	5.13198e-19	0.608212	11.3333	136.279
ADIPOGENESIS	ECH1	1.23996e-15	-0.0585021	29.9394	72.8837
ADIPOGENESIS	NDUFS3	6.07457e-12	5.81585	0.484848	62.4419
ADIPOGENESIS	TKT	9.58665e-11	-0.987114	9.51515	70.186
ADIPOGENESIS	NDUFAB1	4.99921e-10	1.05775	8.21212	53.3023
ADIPOGENESIS	CAT	1.03733e-08	2.61409	4.36364	386.698
ADIPOGENESIS	STOM	4.08739e-08	4.89074	48.3636	2216.42
ADIPOGENESIS	SLC1A5	6.66606e-08	4.02026	5.51515	236.116
ADIPOGENESIS	DLD	2.4836e-07	4.34522	0.424242	49.6744
ADIPOGENESIS	MDH2	4.72071e-07	4.38815	0.0909091	48.4186
ADIPOGENESIS	ATP1B3	4.77589e-07	4.40116	0.0909091	56.1395
ADIPOGENESIS	ADIPOR2	1.07837e-06	1.97854	8.72727	57.8837
ADIPOGENESIS	PLIN2	1.42649e-06	0.452994	11.0909	66.4186
ADIPOGENESIS	NDUFB7	2.0809e-06	3.56209	0.272727	60
ADIPOGENESIS	MGST3	1.28769e-05	3.23036	0.636364	117.14
ADIPOGENESIS	GRPEL1	1.65056e-05	2.18125	1.81818	85.3023
ADIPOGENESIS	ELMOD3	0.000118336	-1.99795	21.7576	11.4884
ADIPOGENESIS	PTCD3	0.000349181	2.49587	3.51515	80.0233
ADIPOGENESIS	POR	0.000662121	2.35504	1.15152	88.0233
ADIPOGENESIS	REEP5	0.000968709	2.18146	1.33333	157.977
ADIPOGENESIS	IDH3G	0.00112441	-0.638246	15.9091	30.6744
ADIPOGENESIS	BCL2L13	0.00164907	4.15933	0.69697	40.2791
ADIPOGENESIS	PFKFB3	0.00192548	2.41217	3.18182	40.6744
ADIPOGENESIS	DNAJB9	0.00233917	2.06287	2.93939	78.0698
ADIPOGENESIS	CHUK	0.00244207	2.02222	0.575758	22.5814
ADIPOGENESIS	NDUFA5	0.00327858	2.15924	16.6364	78.9302
ADIPOGENESIS	ACADM	0.00630538	-2.7488	25.0909	24.5814
ADIPOGENESIS	CRAT	0.00997558	0.379841	271.303	241.512
ADIPOGENESIS	PPP1R15B	0.0138297	-0.0367296	43.6667	233.209
ADIPOGENESIS	GHITM	0.0166147	1.505	18.4848	371.465
ADIPOGENESIS	DECR1	0.0166405	1.65457	1.24242	14.5581
ADIPOGENESIS	GPHN	0.0204147	2.61766	0.545455	6.30233
ADIPOGENESIS	ACLY	0.0208134	1.52864	1.33333	69.2093
ADIPOGENESIS	UBQLN1	0.0216534	-1.43139	53.3333	95.907
ADIPOGENESIS	AGPAT3	0.0231196	2.44962	10.5455	69.3256
ADIPOGENESIS	GBE1	0.0243044	1.43459	0.909091	27.9302
ADIPOGENESIS	NMT1	0.0243281	-0.610198	66.2121	68.0465
ADIPOGENESIS	UQCR11	0.0281803	1.43971	19.2121	172.07
ADIPOGENESIS	ARAF	0.0284257	0.0336284	22.3333	65.4419
ADIPOGENESIS	MAP4K3	0.0284544	-0.780387	12	29.7209
ADIPOGENESIS	PFKL	0.0303776	1.5066	16.1212	106.395
ADIPOGENESIS	SDHC	0.0416367	-2.5354	14.0303	7.09302
ADIPOGENESIS	CYP4B1	0.0420614	-0.0193078	2.93939	7.60465
ADIPOGENESIS	UCP2	0.0648273	1.16527	38.8788	304.163
ADIPOGENESIS	EPHX2	0.0846379	-1.08464	77.8485	106.488
ADIPOGENESIS	UBC	0.0846804	1.13706	109.364	871.395
ADIPOGENESIS	DRAM2	0.0905035	-0.883344	15.8182	30
ADIPOGENESIS	ELOVL6	0.100349	1.07608	10.6364	50.6512
ADIPOGENESIS	FAH	0.100359	1.19271	39.1212	74.1395
ADIPOGENESIS	HADH	0.100504	1.64803	19.6061	81.1163
ADIPOGENESIS	COL4A1	0.10111	1.63614	3.12121	7.16279
ADIPOGENESIS	DBT	0.103499	-3.45526	12.9091	1.93023
ADIPOGENESIS	PPM1B	0.117118	-0.214471	3.21212	18.9767
ADIPOGENESIS	BCL6	0.122578	2.02313	36.6364	473.419
ADIPOGENESIS	UQCR10	0.127958	0.885769	4.87879	87.1395
ADIPOGENESIS	LAMA4	0.128612	0.965016	3.06061	55.6279
ADIPOGENESIS	SOD1	0.130177	1.09108	26.3939	342.814
ADIPOGENESIS	ATP5O	0.131305	0.174049	6.57576	51.5349
ADIPOGENESIS	CS	0.134376	0.887542	4.15152	101.767
ADIPOGENESIS	BAZ2A	0.173272	-0.881405	297.273	150.186
ADIPOGENESIS	G3BP2	0.194285	3.78848	23.1818	289.023
ADIPOGENESIS	ME1	0.202353	-2.24959	10.1212	2.06977
ADIPOGENESIS	ANGPT1	0.205588	0.838317	7.18182	54.3953
ADIPOGENESIS	IFNGR1	0.221796	0.733264	44.6667	314.605
ADIPOGENESIS	UQCRC1	0.244266	0.716625	2.0303	50.907
ADIPOGENESIS	YWHAG	0.298721	0.691449	12.4848	62.0698
ADIPOGENESIS	MYLK	0.329096	0.533139	304.606	417.14
ADIPOGENESIS	RREB1	0.379093	0.729222	102.182	121.163
ADIPOGENESIS	ABCA1	0.387571	2.89665	21.3939	150.372
ADIPOGENESIS	ESYT1	0.405408	1.002	8.15152	112.023
ADIPOGENESIS	ITSN1	0.406198	-0.643656	20.9091	50.4419
ADIPOGENESIS	DNAJC15	0.411287	0.31935	45.3636	63.6047
ADIPOGENESIS	COX7B	0.41248	1.30618	4.93939	276.047
ADIPOGENESIS	DHCR7	0.422513	0.495296	5.06061	58.093
ADIPOGENESIS	SUCLG1	0.425512	0.770407	1.87879	39.6512
ADIPOGENESIS	ETFB	0.42895	0.639109	5.15152	14.7209
ADIPOGENESIS	ATL2	0.436767	3.13097	0.787879	54.6512
ADIPOGENESIS	HIBCH	0.451666	2.40662	8.36364	59.7674
ADIPOGENESIS	PIM3	0.462191	0.498921	32.3333	235
ADIPOGENESIS	LIFR	0.465076	-0.0915486	14.3636	33.0233
ADIPOGENESIS	CD36	0.473854	0.449267	9.18182	90.5814
ADIPOGENESIS	RTN3	0.486945	1.7625	46.7879	149.581
ADIPOGENESIS	RIOK3	0.496107	0.390477	421.455	797.605
ADIPOGENESIS	IMMT	0.498554	0.842507	5.90909	27.0233
ADIPOGENESIS	PTGER3	0.510034	-0.515058	31.0909	21.2558
ADIPOGENESIS	PDCD4	0.534199	-0.377875	113.03	111.209
ADIPOGENESIS	CIDEA	0.534975	-1.02808	4.48485	3.09302
ADIPOGENESIS	GADD45A	0.535271	1.54579	31.303	211.744
ADIPOGENESIS	CYC1	0.539354	0.381498	11.8485	76.8372
ADIPOGENESIS	ARL4A	0.548788	-0.357302	24.0909	52.186
ADIPOGENESIS	ALDH2	0.580865	-0.401309	11.6667	26.2791
ADIPOGENESIS	STAT5A	0.589405	-0.561546	16.5152	45.3488
ADIPOGENESIS	CPT2	0.593759	0.107349	3.57576	20.6279
ADIPOGENESIS	RNF11	0.595938	0.362796	39.7273	122.814
ADIPOGENESIS	COX6A1	0.615171	0.304845	9.39394	92.4186
ADIPOGENESIS	AK2	0.647421	1.4928	1.27273	68.7209
ADIPOGENESIS	NKIRAS1	0.651616	-2.02987	7.81818	6.65116
ADIPOGENESIS	GPX4	0.662351	0.640309	287.182	458.767
ADIPOGENESIS	SDPR	0.671227	1.74451	524.697	1044.35
ADIPOGENESIS	GPD2	0.672724	1.88344	21.7273	37.5116
ADIPOGENESIS	MGLL	0.685645	0.305054	60.9394	162.512
ADIPOGENESIS	TANK	0.726174	-0.648177	18.1818	57.4186
ADIPOGENESIS	CD151	0.760031	0.190561	10.8485	52.8605
ADIPOGENESIS	TALDO1	0.771609	0.831475	160.939	444.209
ADIPOGENESIS	ACOX1	0.783534	1.04777	9.84848	23.8837
ADIPOGENESIS	ENPP2	0.786111	0.173035	4.06061	15.6279
ADIPOGENESIS	SCP2	0.800948	2.2235	1.21212	21.0233
ADIPOGENESIS	ADCY6	0.806379	-0.155958	19.5758	21.8605
ADIPOGENESIS	CMPK1	0.809399	0.150641	39.6364	131.535
ADIPOGENESIS	COX8A	0.83155	-0.489876	7.63636	47.7674
ADIPOGENESIS	ALDOA	0.901968	0.869009	240.03	668.442
ADIPOGENESIS	ITIH5	0.937637	-0.380355	7.81818	3.5814
ADIPOGENESIS	SORBS1	0.945804	-0.0441232	80.8788	398.326
ADIPOGENESIS	SQRDL	0.957259	-0.856708	4.69697	2.83721
ADIPOGENESIS	TOB1	0.968248	0.0241103	40.2727	184.023
ADIPOGENESIS	SSPN	0.974139	0.128492	16.9394	8.76744

## Sheet: MTORC1 SIGNALING
Set	Gene	P value	Log2FoldChange	Mean expression C1	Mean expression C2
MTORC1_SIGNALING	ETF1	4.05977e-232	4.51558	0.636364	162.186
MTORC1_SIGNALING	YKT6	2.49191e-146	3.80513	0	36.9767
MTORC1_SIGNALING	ELOVL5	2.24203e-124	1.59263	0	107.233
MTORC1_SIGNALING	PSMB5	1.38539e-93	2.96903	0	42.6279
MTORC1_SIGNALING	IDI1	2.10255e-24	4.2583	0.454545	56.3953
MTORC1_SIGNALING	PGK1	3.15924e-22	1.58418	13.5455	238.651
MTORC1_SIGNALING	PNP	4.57402e-14	4.08537	3.09091	148.535
MTORC1_SIGNALING	PHGDH	1.30104e-12	5.50922	0.363636	60.2791
MTORC1_SIGNALING	PSME3	2.27318e-11	-2.12473	10.3636	32.8837
MTORC1_SIGNALING	LDHA	2.80017e-11	3.41297	1.57576	269.256
MTORC1_SIGNALING	BTG2	8.05024e-11	2.58857	24.2424	292.256
MTORC1_SIGNALING	SLC2A1	2.1884e-10	3.1353	1.93939	297.419
MTORC1_SIGNALING	HSPE1	1.98923e-09	3.73495	0.181818	143.977
MTORC1_SIGNALING	HSPD1	2.38822e-09	4.59439	1.09091	165.86
MTORC1_SIGNALING	ACSL3	4.44008e-09	1.04052	12.0909	49.4419
MTORC1_SIGNALING	SLC7A11	5.41825e-08	4.55812	0.030303	24.6047
MTORC1_SIGNALING	SLC1A5	6.66606e-08	4.02026	5.51515	236.116
MTORC1_SIGNALING	EIF2S2	8.60508e-08	4.05357	0.545455	96.0465
MTORC1_SIGNALING	NUP205	9.06277e-08	4.68162	0.0606061	45.8372
MTORC1_SIGNALING	HMBS	4.40458e-07	3.29767	1.24242	798.767
MTORC1_SIGNALING	TFRC	5.13897e-07	2.91294	4.45455	249.977
MTORC1_SIGNALING	CALR	8.04295e-07	1.67684	14.4545	498.442
MTORC1_SIGNALING	ADIPOR2	1.07837e-06	1.97854	8.72727	57.8837
MTORC1_SIGNALING	PSMC2	1.33992e-06	0.970014	11.0909	81.5814
MTORC1_SIGNALING	M6PR	2.79075e-06	2.98584	12.0606	219.512
MTORC1_SIGNALING	TUBG1	7.27411e-06	3.55615	0.121212	40.8837
MTORC1_SIGNALING	ACTR2	3.87209e-05	2.89273	0.969697	47.6744
MTORC1_SIGNALING	PITPNB	4.21268e-05	2.9329	0.393939	69.093
MTORC1_SIGNALING	COPS5	4.7382e-05	3.01908	0.363636	47.3488
MTORC1_SIGNALING	HSPA5	5.14107e-05	2.66742	4.45455	501.14
MTORC1_SIGNALING	EEF1E1	7.24638e-05	-0.164835	5.87879	68.3023
MTORC1_SIGNALING	TXNRD1	0.000190771	0.945637	5.72727	92.5349
MTORC1_SIGNALING	PSMD14	0.000268935	2.62156	0.212121	93.4186
MTORC1_SIGNALING	ATP2A2	0.000351133	-1.52959	33.8788	55.1395
MTORC1_SIGNALING	GGA2	0.000565407	2.0351	1.30303	44.2326
MTORC1_SIGNALING	TPI1	0.000937538	2.33063	7	274.488
MTORC1_SIGNALING	BCAT1	0.00162393	-2.27234	80.3333	54.1395
MTORC1_SIGNALING	GTF2H1	0.00182225	-0.606981	18.8788	40.6512
MTORC1_SIGNALING	IFRD1	0.00189085	0.236169	706.03	784.86
MTORC1_SIGNALING	LDLR	0.00233213	-2.08774	151	81.3488
MTORC1_SIGNALING	WARS	0.00259286	1.14017	9.42424	57.9302
MTORC1_SIGNALING	MAP2K3	0.0041653	2.02537	76.0303	835.814
MTORC1_SIGNALING	EDEM1	0.00427354	1.81129	2.54545	94.4186
MTORC1_SIGNALING	FADS2	0.00466032	-1.96335	75.9697	84.2326
MTORC1_SIGNALING	SYTL2	0.00488283	3.63076	1	18.8372
MTORC1_SIGNALING	LGMN	0.00497111	1.67289	8.21212	94.5581
MTORC1_SIGNALING	STIP1	0.00498314	0.150371	35.0909	214.651
MTORC1_SIGNALING	FAM129A	0.00660959	1.91249	2.57576	15.4419
MTORC1_SIGNALING	NFKBIB	0.00959298	1.68909	2.45455	30
MTORC1_SIGNALING	PSMD13	0.00966108	1.67978	6.63636	133.535
MTORC1_SIGNALING	GPI	0.0115829	1.74612	2.90909	126.326
MTORC1_SIGNALING	SKAP2	0.0138497	2.19224	15.0909	44.3953
MTORC1_SIGNALING	PLOD2	0.015938	0.0115725	33.697	37.0698
MTORC1_SIGNALING	CANX	0.0161736	1.60823	3.48485	319.837
MTORC1_SIGNALING	VLDLR	0.0186803	3.33275	0.030303	2.46512
MTORC1_SIGNALING	ACLY	0.0208134	1.52864	1.33333	69.2093
MTORC1_SIGNALING	GLA	0.0235877	1.38412	77.0303	172.721
MTORC1_SIGNALING	GBE1	0.0243044	1.43459	0.909091	27.9302
MTORC1_SIGNALING	NMT1	0.0243281	-0.610198	66.2121	68.0465
MTORC1_SIGNALING	HSP90B1	0.0282331	1.46598	14.3333	519.372
MTORC1_SIGNALING	PFKL	0.0303776	1.5066	16.1212	106.395
MTORC1_SIGNALING	EPRS	0.0333881	-0.53835	7.27273	32.7674
MTORC1_SIGNALING	NFYC	0.0409666	-1.90325	29.8485	22.4884
MTORC1_SIGNALING	PSMC4	0.0531517	1.13781	3.81818	79.5581
MTORC1_SIGNALING	GSK3B	0.0549109	-0.0879997	38.8182	31.907
MTORC1_SIGNALING	PPA1	0.0590093	1.18764	2.36364	16.2093
MTORC1_SIGNALING	MLLT11	0.0647321	0.00207392	17.7879	9.69767
MTORC1_SIGNALING	TBK1	0.0680478	1.66442	2.63636	45.1395
MTORC1_SIGNALING	PRDX1	0.0775045	1.06642	2.51515	102.907
MTORC1_SIGNALING	SLC2A3	0.080433	2.23622	426.394	1880.51
MTORC1_SIGNALING	GAPDH	0.0910258	1.0968	90.5152	1502.72
MTORC1_SIGNALING	PSMD12	0.0921193	1.07696	12.4848	110.581
MTORC1_SIGNALING	UBE2D3	0.100057	2.28597	108.061	646.419
MTORC1_SIGNALING	ELOVL6	0.100349	1.07608	10.6364	50.6512
MTORC1_SIGNALING	STARD4	0.106521	-0.864836	42.8485	52.2326
MTORC1_SIGNALING	SSR1	0.121476	1.26487	34.3939	71.5581
MTORC1_SIGNALING	DDX39A	0.121971	-0.327266	43.9697	113.233
MTORC1_SIGNALING	TCEA1	0.12987	1.02219	11.7576	51.9535
MTORC1_SIGNALING	INSIG1	0.131519	0.962622	46.5152	196.279
MTORC1_SIGNALING	CDKN1A	0.132152	1.30827	207.545	488.419
MTORC1_SIGNALING	SLC9A3R1	0.141554	-0.947027	31.4848	41.3023
MTORC1_SIGNALING	ATP6V1D	0.149837	2.09332	3.0303	53.2093
MTORC1_SIGNALING	EGLN3	0.157078	-0.344025	39.9697	136.233
MTORC1_SIGNALING	PPIA	0.159906	0.870414	16.3636	247.093
MTORC1_SIGNALING	CD9	0.165672	2.39761	37.9394	291.442
MTORC1_SIGNALING	ACACA	0.181635	0.885588	6.51515	38.0233
MTORC1_SIGNALING	HMGCR	0.194565	0.740365	3.0303	63.814
MTORC1_SIGNALING	ME1	0.202353	-2.24959	10.1212	2.06977
MTORC1_SIGNALING	SLC7A5	0.209476	-0.866113	104.121	145.86
MTORC1_SIGNALING	STC1	0.21649	0.877933	8.45455	16.6279
MTORC1_SIGNALING	DDIT4	0.22237	-1.29698	9.15152	30.5116
MTORC1_SIGNALING	RPN1	0.225144	2.23643	65.1818	324.605
MTORC1_SIGNALING	PPP1R15A	0.225801	0.667034	1341.21	3196.56
MTORC1_SIGNALING	RDH11	0.233127	0.761892	382.364	362.419
MTORC1_SIGNALING	ENO1	0.257941	0.262819	59.3333	351.023
MTORC1_SIGNALING	LTA4H	0.263813	-0.19811	9.27273	16.8372
MTORC1_SIGNALING	ITGB2	0.27893	1.2263	4.75758	50.3721
MTORC1_SIGNALING	AK4	0.287142	0.0678357	4.36364	6.27907
MTORC1_SIGNALING	SQLE	0.311978	-0.403623	6.60606	8.02326
MTORC1_SIGNALING	SEC11A	0.321729	4.29389	0	54.4419
MTORC1_SIGNALING	BUB1	0.350337	-0.597191	8.90909	23.8837
MTORC1_SIGNALING	HSPA9	0.354485	0.6114	27.5455	347.326
MTORC1_SIGNALING	ACTR3	0.355723	0.861634	69.4545	561.721
MTORC1_SIGNALING	ADD3	0.364679	0.464844	354.939	258.628
MTORC1_SIGNALING	DAPP1	0.400883	0.838095	93.697	160.116
MTORC1_SIGNALING	FKBP2	0.405064	-0.502608	20.7576	56.0698
MTORC1_SIGNALING	DHCR7	0.422513	0.495296	5.06061	58.093
MTORC1_SIGNALING	GSR	0.471784	-0.425523	7.24242	8.48837
MTORC1_SIGNALING	CCT6A	0.482058	0.407147	3.72727	101.419
MTORC1_SIGNALING	GMPS	0.486649	-0.442967	23.4848	96.6512
MTORC1_SIGNALING	IMMT	0.498554	0.842507	5.90909	27.0233
MTORC1_SIGNALING	SQSTM1	0.526519	1.798	249.212	631.721
MTORC1_SIGNALING	UFM1	0.528722	0.366319	5.09091	57.3488
MTORC1_SIGNALING	BHLHE40	0.529113	1.76211	3.15152	79.4419
MTORC1_SIGNALING	PDK1	0.539404	0.391033	196.758	391.535
MTORC1_SIGNALING	XBP1	0.55283	0.215541	7.87879	51.8372
MTORC1_SIGNALING	SLC6A6	0.5547	0.883714	91.2424	363.628
MTORC1_SIGNALING	TUBA4A	0.597354	0.705502	904.727	1310.6
MTORC1_SIGNALING	ATP5G1	0.599479	0.434617	2.60606	25.4651
MTORC1_SIGNALING	HSPA4	0.602362	2.46917	9.36364	174.279
MTORC1_SIGNALING	HMGCS1	0.607816	0.211654	5.15152	24.7674
MTORC1_SIGNALING	PIK3R3	0.666924	1.15704	2.39394	4.97674
MTORC1_SIGNALING	CORO1A	0.688751	-1.23424	8.66667	64.6047
MTORC1_SIGNALING	RAB1A	0.704734	1.53056	55.6667	294.535
MTORC1_SIGNALING	SLA	0.716774	-0.0409699	18.6061	57.0698
MTORC1_SIGNALING	MTHFD2	0.752105	1.49614	7.87879	62.2093
MTORC1_SIGNALING	PDAP1	0.796875	0.11897	2.66667	5.39535
MTORC1_SIGNALING	PSMC6	0.807766	-0.149102	1.9697	39.3721
MTORC1_SIGNALING	FADS1	0.837626	-0.0127986	38.1818	149.674
MTORC1_SIGNALING	SERPINH1	0.837732	-0.208049	10.4848	35.7674
MTORC1_SIGNALING	PSMA4	0.844453	1.15984	0.878788	48.186
MTORC1_SIGNALING	MTHFD2L	0.846614	-0.410259	20.0909	38.4884
MTORC1_SIGNALING	DDIT3	0.85294	-0.119454	31.9394	105.791
MTORC1_SIGNALING	CTSC	0.860311	-1.04827	17.0606	27.4186
MTORC1_SIGNALING	PSMA3	0.867407	-0.464087	5.15152	42.6279
MTORC1_SIGNALING	SERP1	0.877031	-0.0951358	10.0303	95.1628
MTORC1_SIGNALING	POLR3G	0.882029	1.6335	2.09091	12.3953
MTORC1_SIGNALING	USO1	0.901177	-1.56916	67.0606	51.4651
MTORC1_SIGNALING	ALDOA	0.901968	0.869009	240.03	668.442
MTORC1_SIGNALING	ARPC5L	0.923514	0.58372	4.06061	24.1163
MTORC1_SIGNALING	RPA1	0.937628	-0.615045	14.6667	20.907
MTORC1_SIGNALING	CACYBP	0.946456	-0.0410023	17.0606	116.651
MTORC1_SIGNALING	CCNG1	0.957111	2.25162	111.303	904.535
MTORC1_SIGNALING	P4HA1	0.971861	2.59771	8.66667	44.7907
MTORC1_SIGNALING	NAMPT	0.979247	-1.81253	6.63636	18.2093
MTORC1_SIGNALING	RIT1	0.984682	1.31786	37.5455	141.093
MTORC1_SIGNALING	CXCR4	0.992794	0.581005	35.697	134.279

## Sheet: IRON_ION_HOMEOSTASIS
Set	Gene	P value	Log2FoldChange	Mean expression C1	Mean expression C2
IRON_ION_HOMEOSTASIS	STEAP3	7.4082e-12	0.715926	7.39394	55.4419
IRON_ION_HOMEOSTASIS	CYBRD1	9.05249e-12	1.30418	4.72727	175.372
IRON_ION_HOMEOSTASIS	ATP6V1G1	2.51758e-08	4.51941	0.242424	110.093
IRON_ION_HOMEOSTASIS	EPB42	4.18264e-08	4.80409	1.9697	609.721
IRON_ION_HOMEOSTASIS	ALAS2	5.79561e-08	4.83497	24.8182	2609.51
IRON_ION_HOMEOSTASIS	TFRC	5.13897e-07	2.91294	4.45455	249.977
IRON_ION_HOMEOSTASIS	SKP1	6.27574e-06	3.49288	24.2424	467.186
IRON_ION_HOMEOSTASIS	GLRX3	1.75e-05	3.29534	0.454545	96.3721
IRON_ION_HOMEOSTASIS	SFXN5	4.95144e-05	-2.80752	23.6061	13.7209
IRON_ION_HOMEOSTASIS	NCOA4	6.6692e-05	2.77732	147.091	2144.53
IRON_ION_HOMEOSTASIS	SLC25A37	0.00028426	2.5807	135.606	1970.91
IRON_ION_HOMEOSTASIS	ATP6V1A	0.000971645	2.15847	4.90909	97.186
IRON_ION_HOMEOSTASIS	ATP6V0D1	0.00241322	1.99096	2.84848	99.3488
IRON_ION_HOMEOSTASIS	CUBN	0.00494703	-1.32582	11.0303	18.9302
IRON_ION_HOMEOSTASIS	ISCU	0.00600049	1.87738	33.6061	238
IRON_ION_HOMEOSTASIS	CP	0.00655927	1.63859	1.75758	3.27907
IRON_ION_HOMEOSTASIS	FTL	0.0108688	1.55055	400.636	3426.23
IRON_ION_HOMEOSTASIS	SLC22A17	0.0125649	1.33512	28.1212	62.3953
IRON_ION_HOMEOSTASIS	B2M	0.0144342	2.12755	970.758	9446.05
IRON_ION_HOMEOSTASIS	HEPH	0.047677	1.53322	3.78788	38.2791
IRON_ION_HOMEOSTASIS	FLVCR1	0.0525702	0.128155	28.7273	26.1395
IRON_ION_HOMEOSTASIS	CUL1	0.079916	0.99754	25.6364	93.4186
IRON_ION_HOMEOSTASIS	SLC40A1	0.0969292	1.12474	100	437.442
IRON_ION_HOMEOSTASIS	TFR2	0.112338	-2.57172	22.6364	27.3721
IRON_ION_HOMEOSTASIS	SOD1	0.130177	1.09108	26.3939	342.814
IRON_ION_HOMEOSTASIS	FTH1	0.138412	0.742059	98.3939	372.093
IRON_ION_HOMEOSTASIS	SFXN3	0.139503	2.18854	7.90909	89.5581
IRON_ION_HOMEOSTASIS	ATP6V0A2	0.150086	1.26381	20.3939	97.6047
IRON_ION_HOMEOSTASIS	NEDD8	0.161717	0.816727	3.45455	86.3721
IRON_ION_HOMEOSTASIS	TTC7A	0.200682	0.588732	3.54545	17.6047
IRON_ION_HOMEOSTASIS	BMP6	0.26345	0.712726	16.697	95.1395
IRON_ION_HOMEOSTASIS	SFXN1	0.267002	2.01653	1.42424	6.95349
IRON_ION_HOMEOSTASIS	LCN2	0.28521	0.647076	48.0606	81.6744
IRON_ION_HOMEOSTASIS	FBXL5	0.295574	0.168001	15.0909	59.6977
IRON_ION_HOMEOSTASIS	ABCB6	0.303364	-0.802924	39.5758	30.3256
IRON_ION_HOMEOSTASIS	STEAP4	0.309288	0.205838	9.24242	5.16279
IRON_ION_HOMEOSTASIS	CAND1	0.315897	1.90419	17.4242	40.3488
IRON_ION_HOMEOSTASIS	ABCG2	0.339656	-3.61458	8.30303	0.72093
IRON_ION_HOMEOSTASIS	BTBD9	0.35259	-1.70647	5.51515	3.02326
IRON_ION_HOMEOSTASIS	EIF2AK1	0.377186	-0.111198	242.091	230.326
IRON_ION_HOMEOSTASIS	SFXN2	0.389087	-0.878916	14.0909	8.60465
IRON_ION_HOMEOSTASIS	ATP13A2	0.399793	-1.05506	14.1818	8.76744
IRON_ION_HOMEOSTASIS	HEPHL1	0.494243	-0.711434	5.45455	3.25581
IRON_ION_HOMEOSTASIS	HIF1A	0.558144	0.350243	8.9697	81.0698
IRON_ION_HOMEOSTASIS	NDFIP1	0.599129	-0.35	49.3939	55
IRON_ION_HOMEOSTASIS	NEO1	0.599799	0.603084	2.36364	2.09302
IRON_ION_HOMEOSTASIS	HFE	0.645675	1.96774	17.4242	118.209
IRON_ION_HOMEOSTASIS	SLC11A2	0.712454	-1.54673	17.697	72.4651
IRON_ION_HOMEOSTASIS	IREB2	0.759296	-0.202299	34.7273	73.0233
IRON_ION_HOMEOSTASIS	SMAD4	0.78511	-0.181943	30.4242	17.7209
IRON_ION_HOMEOSTASIS	ATP6AP1	0.828444	1.13846	29.7576	128.767
IRON_ION_HOMEOSTASIS	SLC11A1	0.836171	0.287304	11.9697	11.9767
IRON_ION_HOMEOSTASIS	PICALM	0.926313	-0.057853	14.1818	78.0698

[truncated: 5 more sheets: OXIDATIVE_PHOSPHORYLATION, PANCREAS_BETA_CELLS, UNFOLDED_PROTEIN_RESPONSE, DNA_REPAIR, INTERFERON_ALPHA_RESPONSE]
