# Supplementary material for: The Lipogenic Regulator SREBP2 Induces Transferrin in Circulating Melanoma Cells and Suppresses Ferroptosis
Source: Oxford University Press journal article supplement (doi:10.1158/2159-8290.cd-19-1500), 2020-11-17
Supplement: 21598290cd191500-sup-234279_2_supp_6710156_qjjk29.xlsx [file 21598290cd191500-sup-234279_2_supp_6710156_qjjk29.xlsx]

## Sheet: TCGA_SKCM_Expression_Subtypes
Sample	Expression_Subtypes	Primary.Met.High.Purity	SREBF2	SREBF2.High.Low
SKCM-3N-A9WB-TM	MITF high	Metastases with high purity (>80%)	5.74513	Low
SKCM-3N-A9WC-TM	Immune	Low tumor purity	6.5426
SKCM-3N-A9WD-TM	Keratin high	Low tumor purity	5.88132
SKCM-BF-A1PU-TP	MITF high	Primary tumor with high purity (>80%)	9.14121	High
SKCM-BF-A1PV-TP	MITF high	Low tumor purity	6.20444
SKCM-BF-A1PX-TP	Keratin high	Low tumor purity	6.84623
SKCM-BF-A1PZ-TP	MITF high	Low tumor purity	6.4422
SKCM-BF-A1Q0-TP	MITF low	Low tumor purity	5.15982
SKCM-BF-A3DJ-TP	Immune	Low tumor purity	5.45975
SKCM-BF-A3DL-TP	MITF high	Primary tumor with high purity (>80%)	7.46532	High
SKCM-BF-A3DM-TP	Intermediate	Primary tumor with high purity (>80%)	6.6835	High
SKCM-BF-A3DN-TP	Intermediate	Primary tumor with high purity (>80%)	5.71251	Low
SKCM-BF-A5EO-TP	Keratin high	Low tumor purity	6.69271
SKCM-BF-A5EP-TP	MITF high	Low tumor purity	6.6614
SKCM-BF-A5EQ-TP	Immune	Low tumor purity	6.01378
SKCM-BF-A5ER-TP	MITF high	Primary tumor with high purity (>80%)	7.16065	High
SKCM-BF-A5ES-TP	Keratin high	Low tumor purity	6.99663
SKCM-BF-A9VF-TP	MITF high	Primary tumor with high purity (>80%)	5.57963	Low
SKCM-BF-AAOU-TP	Keratin high	Low tumor purity	5.84776
SKCM-BF-AAOX-TP	MITF high	Low tumor purity	6.43923
SKCM-BF-AAP0-TM	Immune	Low tumor purity	5.36323
SKCM-BF-AAP1-TP	Intermediate	Low tumor purity	6.26845
SKCM-BF-AAP2-TP	MITF high	Low tumor purity	6.2856
SKCM-BF-AAP4-TP	Immune	Low tumor purity	6.60866
SKCM-BF-AAP6-TP	MITF high	Primary tumor with high purity (>80%)	5.47793	Low
SKCM-BF-AAP7-TP	Keratin high	Low tumor purity	6.00461
SKCM-BF-AAP8-TP	Intermediate	Low tumor purity	6.06033
SKCM-D3-A1Q1-TM	Intermediate	Low tumor purity	5.89463
SKCM-D3-A1Q3-TM	Immune	Low tumor purity	6.49252
SKCM-D3-A1Q4-TM	MITF low	Low tumor purity	5.48133
SKCM-D3-A1Q5-TM	MITF low	Metastases with high purity (>80%)	5.40472	Low
SKCM-D3-A1Q6-TM	MITF low	Metastases with high purity (>80%)	5.08606	Low
SKCM-D3-A1Q7-TM	Immune	Low tumor purity	6.15109
SKCM-D3-A1Q8-TM	MITF low	Low tumor purity	4.50029
SKCM-D3-A1Q9-TM	MITF high	Low tumor purity	5.89053
SKCM-D3-A1QB-TM	Immune	Low tumor purity	5.99713
SKCM-D3-A2J6-TM	MITF high	Low tumor purity	6.14628
SKCM-D3-A2J7-TM	Immune	Low tumor purity	7.08409
SKCM-D3-A2J8-TM	Immune	Low tumor purity	6.02657
SKCM-D3-A2J9-TM	Immune	Low tumor purity	5.74046
SKCM-D3-A2JA-TM	MITF low	Low tumor purity	4.78393
SKCM-D3-A2JB-TM	Immune	Low tumor purity	6.50207
SKCM-D3-A2JC-TM	Immune	Low tumor purity	6.9594
SKCM-D3-A2JD-TM	Keratin high	Low tumor purity	6.86262
SKCM-D3-A2JE-TM	Intermediate	Low tumor purity	6.30235
SKCM-D3-A2JF-TM	Immune	Low tumor purity	5.86136
SKCM-D3-A2JG-TM	MITF high	Metastases with high purity (>80%)	5.80342	Low
SKCM-D3-A2JH-TM	Immune	Low tumor purity	5.40558
SKCM-D3-A2JK-TM	Keratin high	Low tumor purity	8.52739
SKCM-D3-A2JL-TM	Immune	Low tumor purity	5.44172
SKCM-D3-A2JN-TM	MITF low	Low tumor purity	5.79918
SKCM-D3-A2JO-TM	Immune	Low tumor purity	6.22125
SKCM-D3-A2JP-TM	Immune	Low tumor purity	6.30568
SKCM-D3-A3BZ-TM	Immune	Low tumor purity	5.5475
SKCM-D3-A3C1-TM	Immune	Low tumor purity	6.78343
SKCM-D3-A3C3-TM	Immune	Low tumor purity	5.31387
SKCM-D3-A3C6-TM	Intermediate	Low tumor purity	6.30393
SKCM-D3-A3C7-TM	MITF low	Low tumor purity	5.8959
SKCM-D3-A3C8-TM	Immune	Low tumor purity	6.24508
SKCM-D3-A3CB-TM	Immune	Low tumor purity	6.18428
SKCM-D3-A3CC-TM	MITF high	Metastases with high purity (>80%)	5.85255	Low
SKCM-D3-A3CE-TM	Immune	Low tumor purity	6.82601
SKCM-D3-A3CF-TM	Immune	Low tumor purity	4.93714
SKCM-D3-A3ML-TM	MITF high	Low tumor purity	6.07939
SKCM-D3-A3MO-TM	MITF low	Metastases with high purity (>80%)	5.60539	Low
SKCM-D3-A3MR-TM	Immune	Low tumor purity	5.17355
SKCM-D3-A3MU-TM	Keratin high	Low tumor purity	6.72576
SKCM-D3-A3MV-TM	MITF low	Low tumor purity	6.36523
SKCM-D3-A51E-TM	Immune	Low tumor purity	5.30563
SKCM-D3-A51F-TM	Immune	Low tumor purity	5.02883
SKCM-D3-A51G-TM	MITF low	Low tumor purity	6.6241
SKCM-D3-A51H-TM	Immune	Low tumor purity	6.17337
SKCM-D3-A51J-TM	Immune	Low tumor purity	6.18493
SKCM-D3-A51K-TM	Keratin high	Low tumor purity	6.80126
SKCM-D3-A51N-TM	Immune	Low tumor purity	5.23589
SKCM-D3-A51R-TM	MITF low	Low tumor purity	5.76468
SKCM-D3-A51T-TM	Immune	Low tumor purity	6.723
SKCM-D3-A5GL-TM	MITF high	Low tumor purity	6.24953
SKCM-D3-A5GN-TM	MITF low	Low tumor purity	6.76339
SKCM-D3-A5GO-TM	Immune	Low tumor purity	6.44931
SKCM-D3-A5GR-TM	Immune	Low tumor purity	6.00598
SKCM-D3-A5GS-TM	Immune	Low tumor purity	6.96404
SKCM-D3-A5GT-TP	MITF high	Primary tumor with high purity (>80%)	5.65436	Low
SKCM-D3-A5GU-TM	Intermediate	Metastases with high purity (>80%)	4.9899	Low
SKCM-D3-A8GB-TM	Immune	Low tumor purity	5.40241
SKCM-D3-A8GC-TM	MITF high	Metastases with high purity (>80%)	6.98228	High
SKCM-D3-A8GD-TM	Immune	Low tumor purity	4.91175
SKCM-D3-A8GE-TM	MITF low	Low tumor purity	4.8668
SKCM-D3-A8GI-TM	MITF high	Metastases with high purity (>80%)	9.16757	High
SKCM-D3-A8GJ-TM	Immune	Low tumor purity	6.37135
SKCM-D3-A8GK-TM	MITF high	Low tumor purity	6.87215
SKCM-D3-A8GL-TM	MITF high	Low tumor purity	6.47603
SKCM-D3-A8GM-TM	MITF high	Low tumor purity	6.0497
SKCM-D3-A8GN-TM	Immune	Low tumor purity	6.62708
SKCM-D3-A8GO-TM	Immune	Low tumor purity	4.41365
SKCM-D3-A8GP-TM	MITF high	Metastases with high purity (>80%)	5.76269	Low
SKCM-D3-A8GQ-TM	MITF low	Low tumor purity	6.15848
SKCM-D3-A8GR-TM	MITF high	Low tumor purity	3.5673
SKCM-D3-A8GS-TM	Immune	Low tumor purity	6.69866
SKCM-D3-A8GV-TM	MITF high	Metastases with high purity (>80%)	6.93002	High
SKCM-D9-A148-TM	MITF high	Low tumor purity	6.26722
SKCM-D9-A149-TM	Immune	Low tumor purity	6.05828
SKCM-D9-A1JW-TM	Immune	Low tumor purity	6.7117
SKCM-D9-A1JX-TM	Immune	Low tumor purity	6.62089
SKCM-D9-A1X3-TM	MITF high	Low tumor purity	6.67236
SKCM-D9-A3Z1-TM	Immune	Low tumor purity	6.68922
SKCM-D9-A3Z3-TM	Immune	Low tumor purity	7.04859
SKCM-D9-A3Z4-TP	Intermediate	Low tumor purity	6.005
SKCM-D9-A4Z2-TP	Intermediate	Low tumor purity	6.70856
SKCM-D9-A4Z3-TP	MITF low	Low tumor purity	6.2357
SKCM-D9-A4Z5-TP	Intermediate	Primary tumor with high purity (>80%)	7.08197	High
SKCM-D9-A4Z6-TM	Intermediate	Low tumor purity	5.99959
SKCM-D9-A6E9-TM	Immune	Low tumor purity	6.69756
SKCM-D9-A6EA-TM	MITF high	Metastases with high purity (>80%)	7.39836	High
SKCM-D9-A6EC-TM	MITF high	Metastases with high purity (>80%)	5.56507	Low
SKCM-D9-A6EG-TM	MITF high	Low tumor purity	6.77264
SKCM-DA-A1HV-TM	Immune	Low tumor purity	6.97246
SKCM-DA-A1HW-TM	Immune	Low tumor purity	5.49429
SKCM-DA-A1HY-TM	MITF low	Metastases with high purity (>80%)	5.57769	Low
SKCM-DA-A1I0-TM	Keratin high	Low tumor purity	7.17101
SKCM-DA-A1I1-TM	Immune	Low tumor purity	7.56583
SKCM-DA-A1I2-TM	Immune	Low tumor purity	5.54164
SKCM-DA-A1I4-TM	Keratin high	Low tumor purity	4.16944
SKCM-DA-A1I5-TM	Immune	Low tumor purity	5.62409
SKCM-DA-A1I7-TM	MITF low	Low tumor purity	7.53439
SKCM-DA-A1I8-TM	MITF low	Low tumor purity	6.65493
SKCM-DA-A1IA-TM	MITF high	Metastases with high purity (>80%)	7.7899	High
SKCM-DA-A1IB-TM	Immune	Low tumor purity	6.88271
SKCM-DA-A1IC-TM	MITF high	Metastases with high purity (>80%)	5.48432	Low
SKCM-DA-A3F2-TM	Immune	Low tumor purity	6.19008
SKCM-DA-A3F3-TM	Intermediate	Low tumor purity	6.78293
SKCM-DA-A3F5-TM	MITF low	Low tumor purity	6.90619
SKCM-DA-A3F8-TM	Immune	Low tumor purity	6.41211
SKCM-DA-A95V-TM	Keratin high	Low tumor purity	7.56597
SKCM-DA-A95W-TM	Intermediate	Metastases with high purity (>80%)	7.08618	High
SKCM-DA-A95X-TM	MITF low	Low tumor purity	4.93911
SKCM-DA-A95Y-TM	MITF high	Low tumor purity	6.79336
SKCM-DA-A95Z-TM	Intermediate	Low tumor purity	6.82483
SKCM-DA-A960-TP	MITF high	Low tumor purity	7.33655
SKCM-EB-A1NK-TP	MITF high	Low tumor purity	6.40915
SKCM-EB-A24C-TP	MITF high	Low tumor purity	6.5267
SKCM-EB-A24D-TP	Intermediate	Primary tumor with high purity (>80%)	7.60121	High
SKCM-EB-A299-TP	Keratin high	Low tumor purity	5.96461
SKCM-EB-A3HV-TP	Keratin high	Low tumor purity	6.70737
SKCM-EB-A3XB-TP	MITF high	Primary tumor with high purity (>80%)	5.27744	Low
SKCM-EB-A3XC-TP	MITF high	Low tumor purity	6.48893
SKCM-EB-A3XD-TP	Keratin high	Low tumor purity	6.64417
SKCM-EB-A3XE-TP	Keratin high	Low tumor purity	6.53867
SKCM-EB-A3XF-TP	Intermediate	Low tumor purity	4.82197
SKCM-EB-A3Y6-TP	MITF high	Low tumor purity	7.18818
SKCM-EB-A3Y7-TP	MITF high	Low tumor purity	5.85059
SKCM-EB-A41A-TP	MITF high	Primary tumor with high purity (>80%)	4.34976	Low
SKCM-EB-A41B-TP	MITF high	Primary tumor with high purity (>80%)	6.78678	High
SKCM-EB-A42Y-TP	MITF high	Low tumor purity	6.20272
SKCM-EB-A42Z-TP	MITF high	Primary tumor with high purity (>80%)	5.85838	Low
SKCM-EB-A430-TP	MITF high	Low tumor purity	5.71215
SKCM-EB-A431-TP	MITF high	Primary tumor with high purity (>80%)	7.38476	High
SKCM-EB-A44N-TP	Keratin high	Low tumor purity	6.12066
SKCM-EB-A44O-TP	MITF high	Low tumor purity	4.89251
SKCM-EB-A44P-TP	MITF high	Low tumor purity	5.37349
SKCM-EB-A44Q-TM	Immune	Low tumor purity	4.87744
SKCM-EB-A44R-TM	Intermediate	Low tumor purity	5.15799
SKCM-EB-A4IQ-TP	MITF high	Primary tumor with high purity (>80%)	7.1882	High
SKCM-EB-A4IS-TP	Immune	Low tumor purity	6.23647
SKCM-EB-A4OY-TP	Keratin high	Low tumor purity	7.94074
SKCM-EB-A4OZ-TP	Keratin high	Low tumor purity	6.39308
SKCM-EB-A4P0-TP	Intermediate	Low tumor purity	4.70273
SKCM-EB-A4XL-TP	Keratin high	Low tumor purity	5.40146
SKCM-EB-A51B-TP	MITF high	Primary tumor with high purity (>80%)	5.61707	Low
SKCM-EB-A550-TP	Keratin high	Low tumor purity	6.26456
SKCM-EB-A551-TP	Immune	Low tumor purity	6.40531
SKCM-EB-A553-TP	Keratin high	Low tumor purity	5.71144
SKCM-EB-A57M-TP	Keratin high	Low tumor purity	5.9162
SKCM-EB-A5FP-TP	MITF high	Low tumor purity	6.43366
SKCM-EB-A5KH-TM	Keratin high	Metastases with high purity (>80%)	7.93419	High
SKCM-EB-A5SE-TP	Intermediate	Low tumor purity	6.5325
SKCM-EB-A5SF-TP	Keratin high	Primary tumor with high purity (>80%)	8.22027	High
SKCM-EB-A5SG-TM	Immune	Low tumor purity	6.50202
SKCM-EB-A5SH-TM	Keratin high	Metastases with high purity (>80%)	8.08277	High
SKCM-EB-A5UL-TM	Immune	Low tumor purity	6.98492
SKCM-EB-A5UM-TP	Keratin high	Low tumor purity	6.43695
SKCM-EB-A5UN-TM	MITF high	Low tumor purity	5.85095
SKCM-EB-A5VU-TP	Intermediate	Primary tumor with high purity (>80%)	5.8218	Low
SKCM-EB-A5VV-TM	Immune	Low tumor purity	5.73189
SKCM-EB-A6L9-TM	Keratin high	Low tumor purity	5.88209
SKCM-EB-A6QY-TP	MITF high	Low tumor purity	5.94413
SKCM-EB-A6QZ-TP	Intermediate	Low tumor purity	5.19825
SKCM-EB-A6R0-TP	Immune	Low tumor purity	5.29192
SKCM-EB-A82B-TP	Immune	Low tumor purity	6.56184
SKCM-EB-A82C-TP	MITF high	Low tumor purity	6.37105
SKCM-EB-A85I-TP	Immune	Low tumor purity	5.02613
SKCM-EB-A85J-TP	Immune	Low tumor purity	5.00374
SKCM-EB-A97M-TP	Keratin high	Low tumor purity	6.92632
SKCM-EE-A17X-TM	MITF high	Low tumor purity	6.67752
SKCM-EE-A17Y-TM	MITF low	Low tumor purity	6.60919
SKCM-EE-A17Z-TM	Intermediate	Metastases with high purity (>80%)	7.64338	High
SKCM-EE-A180-TM	MITF high	Metastases with high purity (>80%)	8.16456	High
SKCM-EE-A181-TM	Immune	Low tumor purity	5.93329
SKCM-EE-A182-TM	Keratin high	Low tumor purity	8.74659
SKCM-EE-A183-TM	Keratin high	Low tumor purity	7.89442
SKCM-EE-A184-TM	MITF high	Metastases with high purity (>80%)	7.53214	High
SKCM-EE-A185-TM	MITF high	Low tumor purity	6.65312
SKCM-EE-A20B-TM	MITF low	Low tumor purity	6.99348
SKCM-EE-A20C-TM	MITF high	Metastases with high purity (>80%)	7.85758	High
SKCM-EE-A20F-TM	Immune	Low tumor purity	6.05803
SKCM-EE-A20H-TM	MITF low	Low tumor purity	6.80424
SKCM-EE-A20I-TM	MITF high	Low tumor purity	6.9601
SKCM-EE-A29A-TM	MITF low	Low tumor purity	6.10857
SKCM-EE-A29B-TM	MITF high	Metastases with high purity (>80%)	7.30857	High
SKCM-EE-A29C-TM	Keratin high	Low tumor purity	5.60255
SKCM-EE-A29D-TM	MITF high	Metastases with high purity (>80%)	5.44758	Low
SKCM-EE-A29E-TM	MITF high	Metastases with high purity (>80%)	5.48507	Low
SKCM-EE-A29G-TM	Keratin high	Low tumor purity	7.22523
SKCM-EE-A29H-TM	MITF high	Low tumor purity	6.76755
SKCM-EE-A29L-TM	MITF high	Metastases with high purity (>80%)	8.81492	High
SKCM-EE-A29M-TM	MITF high	Metastases with high purity (>80%)	7.6202	High
SKCM-EE-A29N-TM	Immune	Low tumor purity	6.37682
SKCM-EE-A29P-TM	Immune	Low tumor purity	6.76209
SKCM-EE-A29Q-TM	MITF high	Low tumor purity	5.90041
SKCM-EE-A29R-TM	MITF low	Low tumor purity	6.3968
SKCM-EE-A29S-TM	Immune	Low tumor purity	6.51147
SKCM-EE-A29T-TM	Immune	Low tumor purity	6.50157
SKCM-EE-A29V-TM	MITF high	Metastases with high purity (>80%)	7.24993	High
SKCM-EE-A29W-TM	MITF low	Metastases with high purity (>80%)	5.30369	Low
SKCM-EE-A29X-TM	Immune	Low tumor purity	7.25437
SKCM-EE-A2A0-TM	MITF low	Low tumor purity	4.19386
SKCM-EE-A2A1-TM	Immune	Low tumor purity	6.43819
SKCM-EE-A2A2-TM	MITF high	Low tumor purity	6.89841
SKCM-EE-A2A5-TM	Intermediate	Low tumor purity	6.51371
SKCM-EE-A2A6-TM	Immune	Low tumor purity	6.93101
SKCM-EE-A2GB-TM	MITF high	Low tumor purity	6.70112
SKCM-EE-A2GC-TM	Immune	Low tumor purity	5.92715
SKCM-EE-A2GD-TM	MITF low	Low tumor purity	5.32536
SKCM-EE-A2GE-TM	Immune	Low tumor purity	5.49576
SKCM-EE-A2GH-TM	Immune	Low tumor purity	5.69569
SKCM-EE-A2GI-TM	Immune	Low tumor purity	6.57597
SKCM-EE-A2GJ-TM	Immune	Low tumor purity	5.94744
SKCM-EE-A2GK-TM	Immune	Low tumor purity	6.48646
SKCM-EE-A2GL-TM	Immune	Low tumor purity	5.53025
SKCM-EE-A2GN-TM	Intermediate	Low tumor purity	5.97623
SKCM-EE-A2GO-TM	MITF low	Low tumor purity	6.5481
SKCM-EE-A2GP-TM	MITF low	Low tumor purity	5.23021
SKCM-EE-A2GR-TM	MITF high	Low tumor purity	6.46945
SKCM-EE-A2GS-TM	Intermediate	Low tumor purity	5.74655
SKCM-EE-A2GT-TM	Immune	Low tumor purity	7.401
SKCM-EE-A2GU-TM	Immune	Low tumor purity	6.74017
SKCM-EE-A2M5-TM	MITF low	Low tumor purity	6.92006
SKCM-EE-A2M6-TM	MITF low	Low tumor purity	7.4766
SKCM-EE-A2M7-TM	MITF low	Low tumor purity	5.17813
SKCM-EE-A2M8-TM	Immune	Low tumor purity	5.17878
SKCM-EE-A2MC-TM	Immune	Low tumor purity	5.74409
SKCM-EE-A2MD-TM	MITF high	Low tumor purity	6.69156
SKCM-EE-A2ME-TM	Immune	Low tumor purity	6.36896
SKCM-EE-A2MF-TM	Intermediate	Metastases with high purity (>80%)	5.51549	Low
SKCM-EE-A2MG-TM	Immune	Low tumor purity	5.88527
SKCM-EE-A2MH-TM	Immune	Low tumor purity	6.01719
SKCM-EE-A2MI-TM	MITF low	Low tumor purity	6.05156
SKCM-EE-A2MJ-TM	Immune	Low tumor purity	7.57557
SKCM-EE-A2MK-TM	Immune	Low tumor purity	6.3489
SKCM-EE-A2ML-TM	Immune	Low tumor purity	6.57922
SKCM-EE-A2MM-TM	MITF low	Metastases with high purity (>80%)	5.47774	Low
SKCM-EE-A2MN-TM	Immune	Low tumor purity	8.48446
SKCM-EE-A2MP-TM	Immune	Low tumor purity	5.13043
SKCM-EE-A2MQ-TM	MITF high	Low tumor purity	7.42803
SKCM-EE-A2MR-TM	Immune	Low tumor purity	5.20373
SKCM-EE-A2MS-TM	MITF low	Low tumor purity	6.50622
SKCM-EE-A2MT-TM	MITF high	Low tumor purity	5.58258
SKCM-EE-A2MU-TM	Immune	Low tumor purity	6.57738
SKCM-EE-A3AA-TM	Immune	Low tumor purity	7.5215
SKCM-EE-A3AB-TM	MITF low	Low tumor purity	5.58296
SKCM-EE-A3AC-TM	Immune	Low tumor purity	5.47853
SKCM-EE-A3AD-TM	MITF high	Low tumor purity	6.48524
SKCM-EE-A3AE-TM	Immune	Low tumor purity	6.62969
SKCM-EE-A3AF-TM	Keratin high	Low tumor purity	6.66699
SKCM-EE-A3AG-TM	MITF low	Low tumor purity	6.00742
SKCM-EE-A3AH-TM	Intermediate	Metastases with high purity (>80%)	7.2832	High
SKCM-EE-A3J3-TM	MITF low	Low tumor purity	6.08601
SKCM-EE-A3J4-TM	Intermediate	Metastases with high purity (>80%)	5.39962	Low
SKCM-EE-A3J5-TM	Immune	Low tumor purity	6.34933
SKCM-EE-A3J7-TM	Intermediate	Metastases with high purity (>80%)	7.29889	High
SKCM-EE-A3J8-TM	Intermediate	Metastases with high purity (>80%)	5.67532	Low
SKCM-EE-A3JA-TM	Immune	Low tumor purity	5.90667
SKCM-EE-A3JB-TM	MITF low	Low tumor purity	5.1463
SKCM-EE-A3JD-TM	Immune	Low tumor purity	5.93021
SKCM-EE-A3JE-TM	Immune	Low tumor purity	5.67255
SKCM-EE-A3JH-TM	Immune	Low tumor purity	5.96081
SKCM-EE-A3JI-TM	Intermediate	Metastases with high purity (>80%)	7.29375	High
SKCM-ER-A193-TM	Immune	Low tumor purity	6.06571
SKCM-ER-A194-TP	Keratin high	Low tumor purity	6.60018
SKCM-ER-A195-TM	MITF low	Low tumor purity	5.7358
SKCM-ER-A196-TP	MITF high	Low tumor purity	6.08175
SKCM-ER-A197-TM	Immune	Low tumor purity	6.21039
SKCM-ER-A198-TM	Immune	Low tumor purity	7.24459
SKCM-ER-A199-TM	Immune	Low tumor purity	6.66378
SKCM-ER-A19A-TM	Immune	Low tumor purity	6.09878
SKCM-ER-A19B-TM	MITF low	Metastases with high purity (>80%)	7.90067	High
SKCM-ER-A19C-TM	MITF high	Metastases with high purity (>80%)	8.58866	High
SKCM-ER-A19D-TM	MITF low	Low tumor purity	4.65374
SKCM-ER-A19E-TM	MITF low	Low tumor purity	4.91985
SKCM-ER-A19F-TM	MITF high	Low tumor purity	6.0405
SKCM-ER-A19G-TM	Immune	Low tumor purity	7.16998
SKCM-ER-A19H-TM	Immune	Low tumor purity	4.62839
SKCM-ER-A19J-TM	Intermediate	Low tumor purity	5.5961
SKCM-ER-A19K-TP	MITF high	Low tumor purity	6.47831
SKCM-ER-A19L-TM	MITF low	Metastases with high purity (>80%)	7.65403	High
SKCM-ER-A19M-TM	Immune	Low tumor purity	6.59013
SKCM-ER-A19N-TM	Immune	Low tumor purity	5.35875
SKCM-ER-A19O-TM	Immune	Low tumor purity	6.82129
SKCM-ER-A19P-TM	Immune	Low tumor purity	5.55986
SKCM-ER-A19Q-TM	Immune	Low tumor purity	5.77834
SKCM-ER-A19S-TM	Immune	Low tumor purity	6.10469
SKCM-ER-A19T-TM	Intermediate	Low tumor purity	6.61437
SKCM-ER-A19W-TM	Immune	Low tumor purity	6.57335
SKCM-ER-A1A1-TM	Immune	Low tumor purity	6.1551
SKCM-ER-A2NB-TP	Keratin high	Low tumor purity	7.75894
SKCM-ER-A2NC-TM	MITF low	Low tumor purity	6.06983
SKCM-ER-A2ND-TM	MITF high	Low tumor purity	6.2314
SKCM-ER-A2NE-TM	MITF high	Metastases with high purity (>80%)	7.55041	High
SKCM-ER-A2NF-TM	Intermediate	Low tumor purity	7.3999
SKCM-ER-A2NG-TM	Immune	Low tumor purity	6.75253
SKCM-ER-A2NH-TM	Immune	Low tumor purity	6.36766
SKCM-ER-A3ES-TM	Intermediate	Low tumor purity	6.09646
SKCM-ER-A3ET-TM	Immune	Low tumor purity	6.60989
SKCM-ER-A3EV-TM	Keratin high	Low tumor purity	6.77089
SKCM-ER-A3PL-TM	MITF low	Low tumor purity	5.88754
SKCM-ER-A42H-TP	Intermediate	Low tumor purity	6.08465
SKCM-ER-A42K-TM	MITF low	Low tumor purity	6.80204
SKCM-ER-A42L-TM	Immune	Low tumor purity	6.97699
SKCM-FR-A2OS-TP	Intermediate	Low tumor purity	6.01865
SKCM-FR-A3R1-TP	Immune	Low tumor purity	6.41292
SKCM-FR-A3YN-TM	MITF high	Low tumor purity	6.00634
SKCM-FR-A3YO-TM	Keratin high	Low tumor purity	6.22168
SKCM-FR-A44A-TM	Immune	Low tumor purity	7.00239
SKCM-FR-A69P-TM	Intermediate	Low tumor purity	6.46024
SKCM-FR-A726-TP	MITF high	Low tumor purity	5.41268
SKCM-FR-A728-TP	Immune	Low tumor purity	5.71815
SKCM-FR-A729-TM	Immune	Low tumor purity	4.75956
SKCM-FR-A7U8-TM	Intermediate	Metastases with high purity (>80%)	7.47137	High
SKCM-FR-A7U9-TM	Immune	Low tumor purity	4.5341
SKCM-FR-A7UA-TM	Immune	Low tumor purity	6.17643
SKCM-FR-A8YC-TM	Intermediate	Low tumor purity	6.18742
SKCM-FR-A8YD-TM	Keratin high	Metastases with high purity (>80%)	9.35701	High
SKCM-FR-A8YE-TM	Immune	Low tumor purity	6.22315
SKCM-FS-A1YW-TM	Intermediate	Metastases with high purity (>80%)	5.10921	Low
SKCM-FS-A1YX-TM	Intermediate	Low tumor purity	6.67896
SKCM-FS-A1YY-TM	MITF high	Metastases with high purity (>80%)	5.52127	Low
SKCM-FS-A1Z0-TM	Immune	Low tumor purity	6.8073
SKCM-FS-A1Z3-TM	Intermediate	Metastases with high purity (>80%)	5.78852	Low
SKCM-FS-A1Z4-TM	Immune	Low tumor purity	5.69919
SKCM-FS-A1Z7-TM	Intermediate	Low tumor purity	5.23143
SKCM-FS-A1ZA-TM	MITF low	Low tumor purity	6.3891
SKCM-FS-A1ZB-TM	Keratin high	Low tumor purity	6.5912
SKCM-FS-A1ZC-TM	MITF low	Low tumor purity	6.01483
SKCM-FS-A1ZD-TM	MITF low	Low tumor purity	5.95154
SKCM-FS-A1ZE-TM	MITF high	Metastases with high purity (>80%)	7.77434	High
SKCM-FS-A1ZF-TM	Intermediate	Metastases with high purity (>80%)	5.77613	Low
SKCM-FS-A1ZG-TM	MITF high	Metastases with high purity (>80%)	5.67385	Low
SKCM-FS-A1ZH-TM	MITF low	Low tumor purity	5.80967
SKCM-FS-A1ZJ-TM	Intermediate	Low tumor purity	5.88112
SKCM-FS-A1ZK-TM	MITF high	Low tumor purity	5.92232
SKCM-FS-A1ZM-TM	MITF low	Low tumor purity	6.0882
SKCM-FS-A1ZN-TP	Intermediate	Low tumor purity	5.98913
SKCM-FS-A1ZP-TM	Intermediate	Low tumor purity	5.44077
SKCM-FS-A1ZQ-TM	MITF high	Low tumor purity	6.53359
SKCM-FS-A1ZR-TM	Intermediate	Low tumor purity	6.33926
SKCM-FS-A1ZS-TM	MITF low	Low tumor purity	6.25039
SKCM-FS-A1ZT-TM	Immune	Low tumor purity	6.62715
SKCM-FS-A1ZU-TM	Intermediate	Metastases with high purity (>80%)	8.23728	High
SKCM-FS-A1ZW-TM	Immune	Low tumor purity	5.99375
SKCM-FS-A1ZY-TM	Intermediate	Metastases with high purity (>80%)	9.08857	High
SKCM-FS-A1ZZ-TM	MITF high	Low tumor purity	6.43315
SKCM-FS-A4F0-TM	MITF high	Metastases with high purity (>80%)	4.64847	Low
SKCM-FS-A4F2-TM	MITF low	Low tumor purity	6.62699
SKCM-FS-A4F4-TM	Keratin high	Low tumor purity	8.74219
SKCM-FS-A4F5-TM	MITF high	Low tumor purity	6.63769
SKCM-FS-A4F8-TM	Immune	Low tumor purity	5.86511
SKCM-FS-A4F9-TM	MITF high	Metastases with high purity (>80%)	7.22438	High
SKCM-FS-A4FB-TM	Intermediate	Low tumor purity	6.04022
SKCM-FS-A4FC-TM	MITF high	Low tumor purity	6.46313
SKCM-FS-A4FD-TM	Intermediate	Low tumor purity	6.82487
SKCM-FW-A3I3-TM	MITF high	Metastases with high purity (>80%)	5.64548	Low
SKCM-FW-A3R5-TM	MITF high	Low tumor purity	6.6366
SKCM-FW-A3TU-TM	Keratin high	Low tumor purity	6.81559
SKCM-FW-A3TV-TM	MITF high	Low tumor purity	6.14939
SKCM-FW-A5DX-TP	Intermediate	Primary tumor with high purity (>80%)	5.21363	Low
SKCM-FW-A5DY-TM	Immune	Low tumor purity	6.29249
SKCM-GF-A2C7-TP	Intermediate	Primary tumor with high purity (>80%)	6.57931	High
SKCM-GF-A3OT-TM	MITF low	Low tumor purity	6.51923
SKCM-GF-A4EO-TM	Immune	Low tumor purity	5.85803
SKCM-GF-A6C8-TM	Immune	Low tumor purity	5.80767
SKCM-GF-A6C9-TM	Immune	Low tumor purity	5.59834
SKCM-GF-A769-TP	MITF low	Low tumor purity	6.49196
SKCM-GN-A262-TM	Intermediate	Low tumor purity	6.64269
SKCM-GN-A263-TP	MITF high	Low tumor purity	4.45797
SKCM-GN-A264-TM	MITF high	Low tumor purity	6.64382
SKCM-GN-A265-TM	Immune	Low tumor purity	6.38592
SKCM-GN-A266-TM	Immune	Low tumor purity	5.70882
SKCM-GN-A267-TM	Intermediate	Low tumor purity	5.74356
SKCM-GN-A268-TM	MITF high	Low tumor purity	6.64334
SKCM-GN-A26A-TM	MITF low	Low tumor purity	6.03822
SKCM-GN-A26C-TP	Immune	Low tumor purity	5.89466
SKCM-GN-A26D-TM	MITF high	Metastases with high purity (>80%)	7.32002	High
SKCM-GN-A4U3-TM	MITF high	Low tumor purity	6.81383
SKCM-GN-A4U4-TM	Intermediate	Low tumor purity	6.5768
SKCM-GN-A4U5-TP	Keratin high	Low tumor purity	6.11462
SKCM-GN-A4U7-TM	MITF high	Low tumor purity	6.62383
SKCM-GN-A4U8-TM	Immune	Low tumor purity	5.44819
SKCM-GN-A4U9-TM	MITF low	Metastases with high purity (>80%)	4.90903	Low
SKCM-GN-A8LK-TM	MITF high	Low tumor purity	6.67172
SKCM-GN-A8LL-TM	Keratin high	Metastases with high purity (>80%)	7.2502	High
SKCM-GN-A8LN-TP	Intermediate	Low tumor purity	6.18354
SKCM-GN-A9SD-TM	Immune	Low tumor purity	5.11182
SKCM-HR-A2OG-TM	MITF low	Low tumor purity	6.6884
SKCM-HR-A2OH-TM	Immune	Low tumor purity	6.58366
SKCM-HR-A5NC-TP	Intermediate	Low tumor purity	6.21482
SKCM-IH-A3EA-TP	Keratin high	Primary tumor with high purity (>80%)	6.73206	High
SKCM-LH-A9QB-TM	MITF low	Low tumor purity	6.48094
SKCM-OD-A75X-TM	Intermediate	Low tumor purity	6.24961
SKCM-QB-A6FS-TM	Keratin high	Low tumor purity	7.88154
SKCM-QB-AA9O-TM	Immune	Low tumor purity	5.38275
SKCM-RP-A690-TM	Intermediate	Low tumor purity	5.97545
SKCM-RP-A693-TM	Immune	Low tumor purity	6.39085
SKCM-RP-A694-TM	Intermediate	Low tumor purity	7.43522
SKCM-RP-A695-TM	MITF high	Metastases with high purity (>80%)	6.95235	High
SKCM-RP-A6K9-TM	Intermediate	Low tumor purity	6.39164
SKCM-W3-A824-TM	Immune	Metastases with high purity (>80%)	5.57966	Low
SKCM-W3-A825-TM	MITF low	Low tumor purity	4.783
SKCM-W3-A828-TM	MITF low	Low tumor purity	5.70049
SKCM-W3-AA1O-TM	MITF high	Low tumor purity	6.34537
SKCM-W3-AA1Q-TM	Intermediate	Low tumor purity	5.76542
SKCM-W3-AA1R-TM	MITF high	Low tumor purity	6.53126
SKCM-W3-AA1W-TM	Immune	Low tumor purity	5.79691
SKCM-W3-AA21-TM	Intermediate	Metastases with high purity (>80%)	5.52686	Low
SKCM-WE-A8JZ-TM	Intermediate	Metastases with high purity (>80%)	5.54133	Low
SKCM-WE-A8K1-TM	Immune	Low tumor purity	6.12164
SKCM-WE-A8K4-TP	Immune	Low tumor purity	4.70929
SKCM-WE-A8K5-TM	Intermediate	Low tumor purity	4.98757
SKCM-WE-A8K6-TM	MITF low	Low tumor purity	6.78891
SKCM-WE-A8ZM-TM	MITF low	Metastases with high purity (>80%)	5.32688	Low
SKCM-WE-A8ZN-TM	Keratin high	Low tumor purity	6.76024
SKCM-WE-A8ZO-TM	Immune	Low tumor purity	6.20123
SKCM-WE-A8ZQ-TM	MITF low	Metastases with high purity (>80%)	4.3361	Low
SKCM-WE-A8ZR-TM	MITF high	Low tumor purity	6.70664
SKCM-WE-A8ZT-TM	Intermediate	Low tumor purity	6.3394
SKCM-WE-A8ZX-TM	Immune	Low tumor purity	5.74068
SKCM-WE-A8ZY-TM	MITF high	Low tumor purity	6.57167
SKCM-WE-AA9Y-TM	Keratin high	Low tumor purity	6.47869
SKCM-WE-AAA0-TM	MITF high	Low tumor purity	6.24997
SKCM-WE-AAA3-TM	Intermediate	Low tumor purity	7.38321
SKCM-WE-AAA4-TM	Keratin high	Low tumor purity	6.32355
SKCM-XV-A9VZ-TP	Keratin high	Low tumor purity	6.03464
SKCM-XV-A9W2-TP	MITF high	Low tumor purity	7.57377
SKCM-XV-A9W5-TP	MITF low	Primary tumor with high purity (>80%)	5.6835	Low
SKCM-XV-AAZV-TP	MITF low	Low tumor purity	6.36135
SKCM-XV-AAZW-TP	Keratin high	Primary tumor with high purity (>80%)	5.85692	Low
SKCM-XV-AAZY-TP	Keratin high	Low tumor purity	8.04628
SKCM-YD-A89C-TM	MITF low	Low tumor purity	6.1372
SKCM-YD-A9TA-TM	MITF low	Low tumor purity	6.96396
SKCM-YD-A9TB-TM	MITF low	Low tumor purity	5.78736
SKCM-YG-AA3N-TP	Immune	Low tumor purity	5.88673
SKCM-YG-AA3O-TM	MITF high	Low tumor purity	5.56501
SKCM-YG-AA3P-TM	Intermediate	Metastases with high purity (>80%)	5.15737	Low
SKCM-Z2-A8RT-TM	Immune	Low tumor purity	6.09924
SKCM-Z2-AA3S-TM	Intermediate	Metastases with high purity (>80%)	4.04871	Low
SKCM-Z2-AA3V-TM	Keratin high	Low tumor purity	6.98854
SKCM-D3-A1QA-TAM	Immune	Metastases with high purity (>80%)	7.52438	High
